# Supplementary material for: Computational study of productive and non-productive cycles in fluoroalkene metathesis
Source: publisher site journal article supplement (doi:10.3762/bjoc.11.232), 2015-11-10
Supplement: Additional file 1 [file 1860-5397-11-232-S1.pdf]

## Supporting Information

for

# Computational study of productive and non-productive cycles in fluoroalkene metathesis

Markéta Rybáčková, Jan Hošek, Ondřej Šimůnek, Viola Kolaříková and Jaroslav Kvíčala\*

Address: Department of Organic Chemistry, University of Chemistry and Technology, Technická 5, 166 28 Prague 6, Czech Republic

Email: Jaroslav Kvíčala - kvicalaj@vscht.cz

\*Corresponding author

**Table containing total electronic and free Gibbs energies in hartrees, total and relative electronic and free Gibbs energies in kJ/mol for all computed structures, as well as their coordinates in the pdb format.**

Table S1. Total electronic and free Gibbs energies in hartrees, total and relative electronic and free Gibbs energies in kJ/mol for all computed structures.

| Structure  | Total electronic energy (hartree) | Total free Gibbs energy (hartree) | Total electronic energy (kJ/mol) | Relative electronic energy (kJ/mol) | Total free Gibbs energy (kJ/mol) | Relative free Gibbs energy (kJ/mol) |
|------------|-----------------------------------|-----------------------------------|----------------------------------|-------------------------------------|----------------------------------|-------------------------------------|
| <b>1a</b>  | -2482.573127                      | -2481.977548                      | -6517995.75                      | 1.50                                | -6516432.05                      | <b>0.00</b>                         |
| <b>1b</b>  | -2482.557065                      | -2481.958447                      | -6517953.57                      | 43.67                               | -6516381.90                      | <b>50.15</b>                        |
| <b>1c</b>  | -2482.559513                      | -2481.958603                      | -6517960.00                      | 37.25                               | -6516382.31                      | <b>49.74</b>                        |
| <b>1d</b>  | -2482.552073                      | -2481.948530                      | -6517940.47                      | 56.78                               | -6516355.87                      | <b>76.19</b>                        |
| <b>1I</b>  | -2482.571286                      | -2481.965937                      | -6517990.91                      | 6.34                                | -6516401.57                      | <b>30.48</b>                        |
| <b>1e</b>  | -2482.553076                      | -2481.948593                      | -6517943.10                      | 54.15                               | -6516356.03                      | <b>76.02</b>                        |
| <b>1f</b>  | -2482.559890                      | -2481.957404                      | -6517960.99                      | 36.26                               | -6516379.16                      | <b>52.89</b>                        |
| <b>s2a</b> | -2680.988342                      | -2680.403412                      | -7038934.89                      | 35.93                               | -7037399.16                      | <b>33.32</b>                        |
| <b>s2b</b> | -2680.968034                      | -2680.385592                      | -7038881.57                      | 89.25                               | -7037352.37                      | <b>80.11</b>                        |
| <b>s2c</b> | -2680.968461                      | -2680.383870                      | -7038882.69                      | 88.13                               | -7037347.85                      | <b>84.63</b>                        |
| <b>s2d</b> | -2680.955706                      | -2680.367753                      | -7038849.21                      | 121.61                              | -7037305.54                      | <b>126.95</b>                       |
| <b>s2I</b> | -2680.986839                      | -2680.399458                      | -7038930.95                      | 39.87                               | -7037388.78                      | <b>43.70</b>                        |
| <b>s2e</b> | -2680.985199                      | -2680.398466                      | -7038926.64                      | 44.18                               | -7037386.17                      | <b>46.31</b>                        |
| <b>s2f</b> | -2681.002026                      | -2680.416104                      | -7038970.82                      | 0.00                                | -7037432.48                      | <b>0.00</b>                         |
| <b>a2a</b> | -2680.986070                      | -2680.401973                      | -7038928.93                      | 41.89                               | -7037395.38                      | <b>37.10</b>                        |
| <b>a2b</b> | -2680.965169                      | -2680.382171                      | -7038874.05                      | 96.77                               | -7037343.39                      | <b>89.09</b>                        |
| <b>a2c</b> | -2680.968993                      | -2680.385796                      | -7038884.09                      | 86.73                               | -7037352.91                      | <b>79.57</b>                        |

|             |              |              |             |        |             |               |
|-------------|--------------|--------------|-------------|--------|-------------|---------------|
| <b>a2d</b>  | -2680.948949 | -2680.359077 | -7038831.47 | 139.35 | -7037282.76 | <b>149.72</b> |
| <b>a2I</b>  | -2680.963854 | -2680.371511 | -7038870.60 | 100.22 | -7037315.40 | <b>117.08</b> |
| <b>a2e</b>  | -2680.942048 | -2680.355736 | -7038813.35 | 157.47 | -7037273.98 | <b>158.50</b> |
| <b>a2f</b>  | -2680.960824 | -2680.377057 | -7038862.64 | 108.18 | -7037329.96 | <b>102.52</b> |
| <b>sc3a</b> | -2581.780048 | -2581.190987 | -6778463.51 | 0.00   | -6776916.94 | <b>0.00</b>   |
| <b>sc3b</b> | n.a.         | n.a.         | n.a.        | n.a.   | n.a.        | n.a.          |
| <b>sc3c</b> | n.a.         | n.a.         | n.a.        | n.a.   | n.a.        | n.a.          |
| <b>sc3d</b> | -2581.750821 | -2581.156613 | -6778386.78 | 76.73  | -6776826.69 | <b>90.25</b>  |
| <b>sc3I</b> | -2581.775253 | -2581.178330 | -6778450.93 | 12.59  | -6776883.71 | <b>33.23</b>  |
| <b>sc3e</b> | -2581.761722 | -2581.166154 | -6778415.40 | 48.12  | -6776851.74 | <b>65.20</b>  |
| <b>sc3f</b> | -2581.776091 | -2581.182029 | -6778453.13 | 10.39  | -6776893.42 | <b>23.52</b>  |
| <b>st3a</b> | -2581.777829 | -2581.187167 | -6778457.69 | 5.83   | -6776906.91 | <b>10.03</b>  |
| <b>st3b</b> | -2581.756024 | -2581.159477 | -6778400.44 | 63.07  | -6776834.21 | <b>82.73</b>  |
| <b>st3c</b> | -2581.761868 | -2581.167358 | -6778415.78 | 47.73  | -6776854.90 | <b>62.04</b>  |
| <b>st3d</b> | -2581.747896 | -2581.155150 | -6778379.10 | 84.41  | -6776822.85 | <b>94.09</b>  |
| <b>st3I</b> | -2581.775970 | -2581.178282 | -6778452.81 | 10.71  | -6776883.58 | <b>33.36</b>  |
| <b>st3e</b> | -2581.763141 | -2581.167459 | -6778419.13 | 44.39  | -6776855.16 | <b>61.77</b>  |
| <b>st3f</b> | -2581.779831 | -2581.188713 | -6778462.95 | 0.57   | -6776910.97 | <b>5.97</b>   |
| <b>ac3a</b> | -2581.771516 | -2581.185848 | -6778441.11 | 22.40  | -6776903.44 | <b>13.49</b>  |
| <b>ac3b</b> | -2581.754684 | -2581.162093 | -6778396.92 | 66.59  | -6776841.08 | <b>75.86</b>  |
| <b>ac3c</b> | -2581.761055 | -2581.167999 | -6778413.65 | 49.86  | -6776856.58 | <b>60.35</b>  |
| <b>ac3d</b> | -2581.748141 | -2581.152903 | -6778379.75 | 83.77  | -6776816.95 | <b>99.99</b>  |
| <b>ac3I</b> | -2581.760538 | -2581.160331 | -6778412.29 | 51.22  | -6776836.45 | <b>80.49</b>  |
| <b>ac3e</b> | -2581.737046 | -2581.141452 | -6778350.61 | 112.90 | -6776786.88 | <b>130.05</b> |
| <b>ac3f</b> | -2581.747783 | -2581.153042 | -6778378.80 | 84.71  | -6776817.31 | <b>99.62</b>  |
| <b>at3a</b> | -2581.773076 | -2581.183512 | -6778445.21 | 18.30  | -6776897.31 | <b>19.63</b>  |
| <b>at3b</b> | -2581.756790 | -2581.162633 | -6778402.45 | 61.06  | -6776842.49 | <b>74.44</b>  |
| <b>at3c</b> | -2581.758188 | -2581.164675 | -6778406.12 | 57.39  | -6776847.85 | <b>69.08</b>  |
| <b>at3d</b> | -2581.746289 | -2581.151835 | -6778374.88 | 88.63  | -6776814.14 | <b>102.79</b> |
| <b>at3I</b> | -2581.761737 | -2581.166037 | -6778415.44 | 48.07  | -6776851.43 | <b>65.51</b>  |
| <b>at3e</b> | -2581.738830 | -2581.144079 | -6778355.30 | 108.22 | -6776793.78 | <b>123.16</b> |
| <b>at3f</b> | -2581.760321 | -2581.166387 | -6778411.72 | 51.79  | -6776852.35 | <b>64.59</b>  |
| <b>s2g</b>  | -2455.278100 | -2454.869732 | -6446332.65 | 3.92   | -6445260.48 | <b>13.48</b>  |
| <b>s2h</b>  | -2455.260649 | -2454.849518 | -6446286.83 | 49.74  | -6445207.41 | <b>66.55</b>  |
| <b>s2NA</b> | -2455.272139 | -2454.864468 | -6446317.00 | 19.57  | -6445246.66 | <b>27.30</b>  |
| <b>s2i</b>  | -2455.260649 | -2454.849518 | -6446286.83 | 49.74  | -6445207.41 | <b>66.55</b>  |
| <b>s2j</b>  | -2455.278100 | -2454.869732 | -6446332.65 | 3.92   | -6445260.48 | <b>13.48</b>  |
| <b>a2g</b>  | -2455.279592 | -2454.874867 | -6446336.57 | 0.00   | -6445273.96 | <b>0.00</b>   |
| <b>a2h</b>  | n.a.         | n.a.         | n.a.        | n.a.   | n.a.        | n.a.          |
| <b>a2PA</b> | n.a.         | n.a.         | n.a.        | n.a.   | n.a.        | n.a.          |
| <b>a2i</b>  | -2455.207427 | -2454.801310 | -6446147.10 | 189.47 | -6445080.84 | <b>193.12</b> |
| <b>a2j</b>  | -2455.215796 | -2454.811428 | -6446169.07 | 167.50 | -6445107.40 | <b>166.56</b> |
| <b>s2k</b>  | -2256.835696 | -2256.413633 | -5925322.12 | 91.31  | -5924213.99 | 84.68         |
| <b>s2l</b>  | -2256.822386 | -2256.399978 | -5925287.17 | 126.25 | -5924178.14 | <b>120.53</b> |
| <b>s2PB</b> | -2256.861741 | -2256.438763 | -5925390.50 | 22.93  | -5924279.97 | <b>18.70</b>  |
| <b>s2m</b>  | -2256.858350 | -2256.433379 | -5925381.60 | 31.83  | -5924265.84 | <b>32.84</b>  |
| <b>s2n</b>  | -2256.870473 | -2256.445887 | -5925413.43 | 0.00   | -5924298.68 | <b>0.00</b>   |
| <b>a2k</b>  | -2256.836828 | -2256.415327 | -5925325.09 | 88.34  | -5924218.44 | <b>80.24</b>  |
| <b>a2l</b>  | -2256.823518 | -2256.399301 | -5925290.15 | 123.28 | -5924176.36 | <b>122.31</b> |
| <b>a2NB</b> | -2256.841262 | -2256.415358 | -5925336.73 | 76.69  | -5924218.52 | <b>80.15</b>  |
| <b>a2m</b>  | -2256.823518 | -2256.399301 | -5925290.15 | 123.28 | -5924176.36 | <b>122.31</b> |

|              |              |              |             |        |             |               |
|--------------|--------------|--------------|-------------|--------|-------------|---------------|
| <b>a2n</b>   | -2256.836828 | -2256.415327 | -5925325.09 | 88.34  | -5924218.44 | <b>80.24</b>  |
| <b>sc3g</b>  | -2256.849388 | -2256.427990 | -5925358.07 | 19.30  | -5924251.69 | <b>7.10</b>   |
| <b>sc3h</b>  | -2256.838573 | -2256.412564 | -5925329.67 | 47.70  | -5924211.19 | <b>47.60</b>  |
| <b>sc3NA</b> | -2256.853256 | -2256.426577 | -5925368.22 | 9.15   | -5924247.98 | <b>10.81</b>  |
| <b>sc3i</b>  | -2256.838573 | -2256.412564 | -5925329.67 | 47.70  | -5924211.19 | <b>47.60</b>  |
| <b>sc3j</b>  | -2256.849388 | -2256.427990 | -5925358.07 | 19.30  | -5924251.69 | <b>7.10</b>   |
| <b>st3g</b>  | -2256.850232 | -2256.428577 | -5925360.28 | 17.09  | -5924253.23 | <b>5.56</b>   |
| <b>st3h</b>  | -2256.841508 | -2256.415519 | -5925337.38 | 39.99  | -5924218.95 | <b>39.84</b>  |
| <b>st3NA</b> | -2256.856740 | -2256.430693 | -5925377.37 | 0.00   | -5924258.78 | <b>0.00</b>   |
| <b>st3i</b>  | -2256.841508 | -2256.415519 | -5925337.38 | 39.99  | -5924218.95 | <b>39.84</b>  |
| <b>st3j</b>  | -2256.850232 | -2256.428577 | -5925360.28 | 17.09  | -5924253.23 | <b>5.56</b>   |
| <b>ac3g</b>  | -2256.850198 | -2256.426778 | -5925360.19 | 17.18  | -5924248.51 | <b>10.28</b>  |
| <b>ac3h</b>  | -2256.837399 | -2256.412466 | -5925326.59 | 50.78  | -5924210.93 | <b>47.85</b>  |
| <b>ac3PA</b> | -2256.841934 | -2256.415971 | -5925338.50 | 38.87  | -5924220.13 | <b>38.65</b>  |
| <b>ac3i</b>  | -2256.814521 | -2256.391862 | -5925266.53 | 110.85 | -5924156.83 | <b>101.95</b> |
| <b>ac3j</b>  | -2256.821547 | -2256.402205 | -5925284.97 | 92.40  | -5924183.99 | <b>74.80</b>  |
| <b>at3g</b>  | -2256.851405 | -2256.428217 | -5925363.36 | 14.01  | -5924252.28 | <b>6.50</b>   |
| <b>at3h</b>  | -2256.836260 | -2256.411376 | -5925323.60 | 53.77  | -5924208.07 | <b>50.72</b>  |
| <b>at3PA</b> | -2256.842348 | -2256.416065 | -5925339.58 | 37.79  | -5924220.38 | <b>38.41</b>  |
| <b>at3i</b>  | -2256.810557 | -2256.387829 | -5925256.12 | 121.25 | -5924146.25 | <b>112.54</b> |
| <b>at3j</b>  | -2256.817500 | -2256.395121 | -5925274.35 | 103.03 | -5924165.39 | <b>93.39</b>  |
| <b>s3k</b>   | -2157.627650 | -2157.197385 | -5664851.39 | 62.43  | -5663721.73 | <b>55.44</b>  |
| <b>s3l</b>   | -2157.622366 | -2157.190129 | -5664837.52 | 76.30  | -5663702.68 | <b>74.49</b>  |
| <b>s3PB</b>  | -2157.651429 | -2157.218502 | -5664913.83 | 0.00   | -5663777.18 | <b>0.00</b>   |
| <b>s3m</b>   | -2157.642241 | -2157.209862 | -5664889.70 | 24.12  | -5663754.49 | <b>22.68</b>  |
| <b>s3n</b>   | -2157.650156 | -2157.217637 | -5664910.48 | 3.34   | -5663774.91 | <b>2.27</b>   |
| <b>a3k</b>   | -2157.629594 | -2157.198377 | -5664856.50 | 57.33  | -5663724.34 | <b>52.84</b>  |
| <b>a3l</b>   | -2157.621859 | -2157.189034 | -5664836.19 | 77.64  | -5663699.81 | <b>77.37</b>  |
| <b>a3NB</b>  | -2157.640468 | -2157.206005 | -5664885.05 | 28.78  | -5663744.37 | <b>32.81</b>  |
| <b>a3m</b>   | -2157.621859 | -2157.189034 | -5664836.19 | 77.64  | -5663699.81 | <b>77.37</b>  |
| <b>a3n</b>   | -2157.629594 | -2157.198377 | -5664856.50 | 57.33  | -5663724.34 | <b>52.84</b>  |
| <b>4a</b>    | -2653.653700 | -2653.263990 | -6967167.79 | 0.00   | -6966144.61 | <b>0.00</b>   |
| <b>4b</b>    | -2653.644966 | -2653.250541 | -6967144.86 | 22.93  | -6966109.30 | <b>35.31</b>  |
| <b>4NA</b>   | -2653.651385 | -2653.258662 | -6967161.71 | 6.08   | -6966130.62 | <b>13.99</b>  |
| <b>s5a</b>   | -3014.014501 | -3013.625279 | -7913295.07 | 0.54   | -7912273.17 | <b>8.57</b>   |
| <b>s5b</b>   | -3014.001344 | -3013.612325 | -7913260.53 | 35.08  | -7912239.16 | <b>42.58</b>  |
| <b>s5PA</b>  | -3014.005400 | -3013.616550 | -7913271.18 | 24.44  | -7912250.25 | <b>31.49</b>  |
| <b>s5c</b>   | -3013.996461 | -3013.608234 | -7913247.71 | 47.90  | -7912228.42 | <b>53.32</b>  |
| <b>s5d</b>   | -3014.007883 | -3013.620550 | -7913277.70 | 17.92  | -7912260.75 | <b>20.99</b>  |
| <b>a5a</b>   | -3014.014707 | -3013.628544 | -7913295.61 | 0.00   | -7912281.74 | <b>0.00</b>   |
| <b>a5b</b>   | -3014.002632 | -3013.614315 | -7913263.91 | 31.70  | -7912244.38 | <b>37.36</b>  |
| <b>a5NA</b>  | -3014.007052 | -3013.618624 | -7913275.52 | 20.10  | -7912255.70 | <b>26.04</b>  |
| <b>a5c</b>   | -3014.002632 | -3013.614315 | -7913263.91 | 31.70  | -7912244.38 | <b>37.36</b>  |
| <b>a5d</b>   | -3014.014707 | -3013.628544 | -7913295.61 | 0.00   | -7912281.74 | <b>0.00</b>   |
| <b>sc5e</b>  | -3374.368689 | -3373.983471 | -8859404.99 | 13.22  | -8858393.60 | <b>11.21</b>  |
| <b>sc5f</b>  | -3374.355026 | -3373.968736 | -8859369.12 | 46.93  | -8858354.92 | <b>49.89</b>  |
| <b>sc5NB</b> | -3374.359399 | -3373.972199 | -8859380.60 | 37.61  | -8858364.01 | <b>40.80</b>  |
| <b>sc5g</b>  | -3374.355026 | -3373.968736 | -8859369.12 | 46.93  | -8858354.92 | <b>49.89</b>  |
| <b>sc5h</b>  | -3374.368689 | -3373.983471 | -8859404.99 | 13.22  | -8858393.60 | <b>11.21</b>  |
| <b>st5e</b>  | -3374.369031 | -3373.981034 | -8859405.89 | 12.32  | -8858387.20 | <b>17.60</b>  |
| <b>st5f</b>  | -3374.354438 | -3373.966917 | -8859367.58 | 48.48  | -8858350.14 | <b>54.67</b>  |

|              |              |              |             |       |             |              |
|--------------|--------------|--------------|-------------|-------|-------------|--------------|
| <b>st5NB</b> | -3374.358728 | -3373.972549 | -8859378.84 | 39.37 | -8858364.93 | <b>39.88</b> |
| <b>st5g</b>  | -3374.354438 | -3373.966917 | -8859367.58 | 48.48 | -8858350.14 | <b>54.67</b> |
| <b>st5h</b>  | -3374.369031 | -3373.981034 | -8859405.89 | 12.32 | -8858387.20 | <b>17.60</b> |
| <b>ac5e</b>  | -3374.368393 | -3373.983597 | -8859404.22 | 13.99 | -8858393.93 | <b>10.87</b> |
| <b>ac5f</b>  | -3374.355166 | -3373.968679 | -8859369.49 | 46.57 | -8858354.77 | <b>50.04</b> |
| <b>ac5NB</b> | -3374.359740 | -3373.973217 | -8859381.50 | 36.71 | -8858366.68 | <b>38.13</b> |
| <b>ac5g</b>  | -3374.358353 | -3373.971373 | -8859377.86 | 38.20 | -8858361.84 | <b>42.97</b> |
| <b>ac5h</b>  | -3374.372902 | -3373.987204 | -8859416.05 | 2.15  | -8858403.40 | <b>1.40</b>  |
| <b>at5e</b>  | -3374.369568 | -3373.987739 | -8859407.30 | 10.91 | -8858404.81 | <b>0.00</b>  |
| <b>at5f</b>  | -3374.354242 | -3373.965129 | -8859367.06 | 48.99 | -8858345.45 | <b>59.36</b> |
| <b>at5PB</b> | -3374.360599 | -3373.973985 | -8859383.75 | 34.46 | -8858368.70 | <b>36.11</b> |
| <b>at5g</b>  | -3374.358353 | -3373.972653 | -8859377.86 | 38.20 | -8858365.20 | <b>39.61</b> |
| <b>at5h</b>  | -3374.373723 | -3373.986934 | -8859418.21 | 0.00  | -8858402.70 | <b>2.11</b>  |

List of all computed structures in the pdb format. For visualization, copy the corresponding part of the text into a separate file named „title“.pdb.

### 1a.pdb

```

TITLE          1a
HETATM   1 Ru          0      -0.018   0.350   0.115                Ru
HETATM   2 C          0      -0.585  -3.913   0.231                C
HETATM   3 C          0       0.923  -3.775   0.385                C
HETATM   4 H          0      -1.067  -4.416   1.091                H
HETATM   5 H          0       1.298  -4.153   1.356                H
HETATM   6 C          0      -0.021  -1.613   0.146                C
HETATM   7 N          0       1.135  -2.335   0.288                N
HETATM   8 N          0      -1.037  -2.527   0.134                N
HETATM   9 Cl         0       0.909   0.625  -2.058               Cl
HETATM  10 Cl         0       0.215   0.528   2.471               Cl
HETATM  11 C          0      -1.804   0.744  -0.147                C
HETATM  12 H          0      -2.594  -0.004  -0.313                H
HETATM  13 C          0      -2.267   2.110  -0.150                C
HETATM  14 C          0      -1.326   3.157   0.023                C
HETATM  15 C          0      -3.628   2.436  -0.312                C
HETATM  16 C          0      -1.745   4.488   0.032                C
HETATM  17 C          0      -4.046   3.762  -0.300                C
HETATM  18 H          0      -4.349   1.619  -0.443                H
HETATM  19 C          0      -3.103   4.779  -0.129                C
HETATM  20 H          0      -1.036   5.307   0.163                H
HETATM  21 H          0      -5.106   4.010  -0.424                H
HETATM  22 H          0      -3.423   5.827  -0.119                H
HETATM  23 O          0      -0.062   2.700   0.167                O
HETATM  24 C          0       1.114   3.533   0.363                C
HETATM  25 H          0       1.894   2.756   0.436                H
HETATM  26 C          0       2.477  -1.864   0.167                C
HETATM  27 C          0       3.236  -1.582   1.320                C
HETATM  28 C          0       3.082  -1.870  -1.112                C
HETATM  29 C          0       4.583  -1.227   1.162                C
HETATM  30 C          0       4.426  -1.510  -1.218                C
HETATM  31 C          0       5.190  -1.175  -0.093                C

```

|        |    |   |   |        |        |        |   |
|--------|----|---|---|--------|--------|--------|---|
| HETATM | 32 | H | 0 | 5.175  | -0.997 | 2.059  | H |
| HETATM | 33 | H | 0 | 4.893  | -1.493 | -2.212 | H |
| HETATM | 34 | C | 0 | -2.428 | -2.283 | -0.024 | C |
| HETATM | 35 | C | 0 | -3.235 | -2.123 | 1.115  | C |
| HETATM | 36 | C | 0 | -2.968 | -2.206 | -1.321 | C |
| HETATM | 37 | C | 0 | -4.603 | -1.889 | 0.935  | C |
| HETATM | 38 | C | 0 | -4.340 | -1.975 | -1.460 | C |
| HETATM | 39 | C | 0 | -5.170 | -1.812 | -0.343 | C |
| HETATM | 40 | H | 0 | -5.240 | -1.755 | 1.819  | H |
| HETATM | 41 | H | 0 | -4.768 | -1.905 | -2.468 | H |
| HETATM | 42 | C | 0 | 2.683  | -1.740 | 2.704  | C |
| HETATM | 43 | H | 0 | 2.810  | -0.817 | 3.296  | H |
| HETATM | 44 | H | 0 | 1.608  | -1.969 | 2.711  | H |
| HETATM | 45 | H | 0 | 3.219  | -2.545 | 3.243  | H |
| HETATM | 46 | C | 0 | 2.340  | -2.336 | -2.328 | C |
| HETATM | 47 | H | 0 | 1.253  | -2.181 | -2.252 | H |
| HETATM | 48 | H | 0 | 2.678  | -1.796 | -3.229 | H |
| HETATM | 49 | H | 0 | 2.523  | -3.414 | -2.510 | H |
| HETATM | 50 | C | 0 | 6.619  | -0.751 | -0.245 | C |
| HETATM | 51 | H | 0 | 6.681  | 0.291  | -0.615 | H |
| HETATM | 52 | H | 0 | 7.168  | -0.792 | 0.710  | H |
| HETATM | 53 | H | 0 | 7.160  | -1.375 | -0.978 | H |
| HETATM | 54 | C | 0 | -2.622 | -2.133 | 2.481  | C |
| HETATM | 55 | H | 0 | -3.386 | -2.009 | 3.265  | H |
| HETATM | 56 | H | 0 | -2.077 | -3.072 | 2.691  | H |
| HETATM | 57 | H | 0 | -1.882 | -1.316 | 2.594  | H |
| HETATM | 58 | C | 0 | -2.064 | -2.271 | -2.514 | C |
| HETATM | 59 | H | 0 | -1.428 | -3.176 | -2.517 | H |
| HETATM | 60 | H | 0 | -2.637 | -2.262 | -3.456 | H |
| HETATM | 61 | H | 0 | -1.372 | -1.406 | -2.531 | H |
| HETATM | 62 | C | 0 | -6.632 | -1.524 | -0.517 | C |
| HETATM | 63 | H | 0 | -6.812 | -0.445 | -0.687 | H |
| HETATM | 64 | H | 0 | -7.056 | -2.053 | -1.389 | H |
| HETATM | 65 | H | 0 | -7.218 | -1.808 | 0.372  | H |
| HETATM | 66 | C | 0 | 1.073  | 4.266  | 1.687  | C |
| HETATM | 67 | H | 0 | 2.079  | 4.665  | 1.905  | H |
| HETATM | 68 | H | 0 | 0.373  | 5.118  | 1.707  | H |
| HETATM | 69 | H | 0 | 0.802  | 3.569  | 2.497  | H |
| HETATM | 70 | C | 0 | 1.415  | 4.369  | -0.860 | C |
| HETATM | 71 | H | 0 | 0.718  | 5.212  | -1.003 | H |
| HETATM | 72 | H | 0 | 2.431  | 4.789  | -0.769 | H |
| HETATM | 73 | H | 0 | 1.393  | 3.736  | -1.764 | H |
| HETATM | 74 | H | 0 | 1.487  | -4.299 | -0.409 | H |
| HETATM | 75 | H | 0 | -0.880 | -4.477 | -0.676 | H |
| HETATM | 76 | H | 0 | 3.307  | 1.023  | -0.310 | H |
| HETATM | 77 | C | 0 | 4.089  | 1.792  | -0.406 | C |
| HETATM | 78 | H | 0 | 4.723  | 1.960  | 0.477  | H |
| HETATM | 79 | C | 0 | 4.258  | 2.466  | -1.543 | C |
| HETATM | 80 | H | 0 | 5.040  | 3.230  | -1.661 | H |
| HETATM | 81 | H | 0 | 3.612  | 2.280  | -2.413 | H |

END

## 1b.pdb

|        |        |    |   |        |        |        |    |
|--------|--------|----|---|--------|--------|--------|----|
| TITLE  | 1b.pdb |    |   |        |        |        |    |
| HETATM | 1      | Ru | 0 | -0.525 | 0.346  | -0.407 | Ru |
| HETATM | 2      | C  | 0 | -0.272 | -3.599 | 1.278  | C  |
| HETATM | 3      | C  | 0 | -1.758 | -3.261 | 1.342  | C  |
| HETATM | 4      | H  | 0 | 0.186  | -3.712 | 2.280  | H  |
| HETATM | 5      | H  | 0 | -2.166 | -3.294 | 2.370  | H  |
| HETATM | 6      | C  | 0 | -0.592 | -1.454 | 0.358  | C  |

|        |    |    |   |        |        |        |    |
|--------|----|----|---|--------|--------|--------|----|
| HETATM | 7  | N  | 0 | -1.800 | -1.905 | 0.816  | N  |
| HETATM | 8  | N  | 0 | 0.313  | -2.442 | 0.593  | N  |
| HETATM | 9  | Cl | 0 | -0.526 | 1.361  | 1.787  | Cl |
| HETATM | 10 | Cl | 0 | -0.944 | -0.534 | -2.658 | Cl |
| HETATM | 11 | C  | 0 | 1.282  | 0.307  | -0.816 | C  |
| HETATM | 12 | H  | 0 | 1.620  | -0.606 | -1.342 | H  |
| HETATM | 13 | C  | 0 | 2.377  | 1.237  | -0.643 | C  |
| HETATM | 14 | C  | 0 | 2.245  | 2.617  | -0.303 | C  |
| HETATM | 15 | C  | 0 | 3.680  | 0.713  | -0.815 | C  |
| HETATM | 16 | C  | 0 | 3.402  | 3.387  | -0.106 | C  |
| HETATM | 17 | C  | 0 | 4.817  | 1.475  | -0.587 | C  |
| HETATM | 18 | H  | 0 | 3.769  | -0.338 | -1.116 | H  |
| HETATM | 19 | C  | 0 | 4.668  | 2.817  | -0.228 | C  |
| HETATM | 20 | H  | 0 | 3.322  | 4.452  | 0.121  | H  |
| HETATM | 21 | H  | 0 | 5.813  | 1.035  | -0.704 | H  |
| HETATM | 22 | H  | 0 | 5.552  | 3.445  | -0.062 | H  |
| HETATM | 23 | O  | 0 | 0.999  | 3.098  | -0.286 | O  |
| HETATM | 24 | C  | 0 | 0.595  | 4.308  | 0.392  | C  |
| HETATM | 25 | H  | 0 | -0.491 | 4.125  | 0.495  | H  |
| HETATM | 26 | C  | 0 | -3.033 | -1.240 | 0.545  | C  |
| HETATM | 27 | C  | 0 | -3.696 | -1.487 | -0.679 | C  |
| HETATM | 28 | C  | 0 | -3.603 | -0.391 | 1.517  | C  |
| HETATM | 29 | C  | 0 | -4.849 | -0.752 | -0.970 | C  |
| HETATM | 30 | C  | 0 | -4.758 | 0.325  | 1.179  | C  |
| HETATM | 31 | C  | 0 | -5.373 | 0.183  | -0.069 | C  |
| HETATM | 32 | H  | 0 | -5.352 | -0.918 | -1.932 | H  |
| HETATM | 33 | H  | 0 | -5.190 | 1.009  | 1.921  | H  |
| HETATM | 34 | C  | 0 | 1.726  | -2.435 | 0.408  | C  |
| HETATM | 35 | C  | 0 | 2.256  | -3.069 | -0.733 | C  |
| HETATM | 36 | C  | 0 | 2.564  | -1.895 | 1.399  | C  |
| HETATM | 37 | C  | 0 | 3.645  | -3.162 | -0.860 | C  |
| HETATM | 38 | C  | 0 | 3.950  | -2.013 | 1.234  | C  |
| HETATM | 39 | C  | 0 | 4.506  | -2.642 | 0.116  | C  |
| HETATM | 40 | H  | 0 | 4.066  | -3.648 | -1.750 | H  |
| HETATM | 41 | H  | 0 | 4.612  | -1.591 | 2.001  | H  |
| HETATM | 42 | C  | 0 | -3.251 | -2.571 | -1.612 | C  |
| HETATM | 43 | H  | 0 | -3.414 | -2.289 | -2.664 | H  |
| HETATM | 44 | H  | 0 | -2.182 | -2.816 | -1.513 | H  |
| HETATM | 45 | H  | 0 | -3.835 | -3.495 | -1.424 | H  |
| HETATM | 46 | C  | 0 | -3.071 | -0.323 | 2.915  | C  |
| HETATM | 47 | H  | 0 | -3.122 | 0.701  | 3.320  | H  |
| HETATM | 48 | H  | 0 | -3.682 | -0.967 | 3.580  | H  |
| HETATM | 49 | H  | 0 | -2.023 | -0.647 | 2.989  | H  |
| HETATM | 50 | C  | 0 | -6.562 | 1.017  | -0.437 | C  |
| HETATM | 51 | H  | 0 | -6.251 | 1.937  | -0.968 | H  |
| HETATM | 52 | H  | 0 | -7.249 | 0.481  | -1.114 | H  |
| HETATM | 53 | H  | 0 | -7.133 | 1.339  | 0.449  | H  |
| HETATM | 54 | C  | 0 | 1.341  | -3.570 | -1.807 | C  |
| HETATM | 55 | H  | 0 | 1.904  | -4.051 | -2.624 | H  |
| HETATM | 56 | H  | 0 | 0.607  | -4.308 | -1.430 | H  |
| HETATM | 57 | H  | 0 | 0.744  | -2.744 | -2.243 | H  |
| HETATM | 58 | C  | 0 | 1.993  | -1.168 | 2.575  | C  |
| HETATM | 59 | H  | 0 | 1.137  | -1.698 | 3.031  | H  |
| HETATM | 60 | H  | 0 | 2.753  | -1.011 | 3.358  | H  |
| HETATM | 61 | H  | 0 | 1.597  | -0.176 | 2.280  | H  |
| HETATM | 62 | C  | 0 | 5.992  | -2.705 | -0.067 | C  |
| HETATM | 63 | H  | 0 | 6.530  | -2.692 | 0.897  | H  |
| HETATM | 64 | H  | 0 | 6.306  | -3.605 | -0.623 | H  |
| HETATM | 65 | H  | 0 | 6.360  | -1.835 | -0.645 | H  |
| HETATM | 66 | C  | 0 | 0.798  | 5.529  | -0.486 | C  |
| HETATM | 67 | H  | 0 | 0.297  | 6.402  | -0.031 | H  |
| HETATM | 68 | H  | 0 | 1.861  | 5.791  | -0.618 | H  |

|        |    |   |   |        |        |        |   |
|--------|----|---|---|--------|--------|--------|---|
| HETATM | 69 | H | 0 | 0.363  | 5.379  | -1.489 | H |
| HETATM | 70 | C | 0 | 1.157  | 4.452  | 1.794  | C |
| HETATM | 71 | H | 0 | 2.180  | 4.861  | 1.826  | H |
| HETATM | 72 | H | 0 | 0.514  | 5.146  | 2.363  | H |
| HETATM | 73 | H | 0 | 1.139  | 3.482  | 2.317  | H |
| HETATM | 74 | H | 0 | -2.379 | -3.934 | 0.719  | H |
| HETATM | 75 | H | 0 | -0.058 | -4.528 | 0.717  | H |
| HETATM | 76 | C | 0 | -1.559 | 2.624  | -1.897 | C |
| HETATM | 77 | H | 0 | -1.075 | 3.602  | -1.786 | H |
| HETATM | 78 | H | 0 | -1.385 | 2.081  | -2.834 | H |
| HETATM | 79 | C | 0 | -2.335 | 2.114  | -0.926 | C |
| HETATM | 80 | H | 0 | -2.879 | 1.163  | -1.073 | H |
| HETATM | 81 | H | 0 | -2.528 | 2.647  | 0.015  | H |

END

## 1c.pdb

| TITLE  | 1c.pdb |    |   |        |        |        |    |
|--------|--------|----|---|--------|--------|--------|----|
| HETATM | 1      | Ru | 0 | -0.571 | 0.369  | -0.649 | Ru |
| HETATM | 2      | C  | 0 | -0.670 | -3.296 | 1.732  | C  |
| HETATM | 3      | C  | 0 | -2.126 | -2.850 | 1.691  | C  |
| HETATM | 4      | H  | 0 | -0.232 | -3.249 | 2.748  | H  |
| HETATM | 5      | H  | 0 | -2.565 | -2.700 | 2.695  | H  |
| HETATM | 6      | C  | 0 | -0.816 | -1.322 | 0.464  | C  |
| HETATM | 7      | N  | 0 | -2.051 | -1.583 | 0.968  | N  |
| HETATM | 8      | N  | 0 | 0.002  | -2.324 | 0.859  | N  |
| HETATM | 9      | Cl | 0 | -0.568 | 1.553  | 1.501  | Cl |
| HETATM | 10     | Cl | 0 | -1.033 | -0.958 | -2.658 | Cl |
| HETATM | 11     | C  | 0 | 1.259  | 0.205  | -0.935 | C  |
| HETATM | 12     | H  | 0 | 1.507  | -0.791 | -1.357 | H  |
| HETATM | 13     | C  | 0 | 2.465  | 0.995  | -0.791 | C  |
| HETATM | 14     | C  | 0 | 2.571  | 2.359  | -0.364 | C  |
| HETATM | 15     | C  | 0 | 3.670  | 0.302  | -1.072 | C  |
| HETATM | 16     | C  | 0 | 3.846  | 2.931  | -0.210 | C  |
| HETATM | 17     | C  | 0 | 4.921  | 0.876  | -0.909 | C  |
| HETATM | 18     | H  | 0 | 3.586  | -0.736 | -1.419 | H  |
| HETATM | 19     | C  | 0 | 5.001  | 2.200  | -0.470 | C  |
| HETATM | 20     | H  | 0 | 3.936  | 3.977  | 0.089  | H  |
| HETATM | 21     | H  | 0 | 5.829  | 0.304  | -1.131 | H  |
| HETATM | 22     | H  | 0 | 5.978  | 2.683  | -0.345 | H  |
| HETATM | 23     | O  | 0 | 1.436  | 3.041  | -0.205 | O  |
| HETATM | 24     | C  | 0 | 1.282  | 4.194  | 0.655  | C  |
| HETATM | 25     | H  | 0 | 0.191  | 4.174  | 0.822  | H  |
| HETATM | 26     | C  | 0 | -3.221 | -0.839 | 0.621  | C  |
| HETATM | 27     | C  | 0 | -3.919 | -1.158 | -0.566 | C  |
| HETATM | 28     | C  | 0 | -3.712 | 0.148  | 1.500  | C  |
| HETATM | 29     | C  | 0 | -5.006 | -0.359 | -0.935 | C  |
| HETATM | 30     | C  | 0 | -4.801 | 0.924  | 1.087  | C  |
| HETATM | 31     | C  | 0 | -5.438 | 0.708  | -0.139 | C  |
| HETATM | 32     | H  | 0 | -5.537 | -0.589 | -1.868 | H  |
| HETATM | 33     | H  | 0 | -5.169 | 1.713  | 1.757  | H  |
| HETATM | 34     | C  | 0 | 1.402  | -2.469 | 0.632  | C  |
| HETATM | 35     | C  | 0 | 1.832  | -3.320 | -0.406 | C  |
| HETATM | 36     | C  | 0 | 2.324  | -1.843 | 1.489  | C  |
| HETATM | 37     | C  | 0 | 3.203  | -3.535 | -0.569 | C  |
| HETATM | 38     | C  | 0 | 3.689  | -2.087 | 1.292  | C  |
| HETATM | 39     | C  | 0 | 4.145  | -2.928 | 0.273  | C  |
| HETATM | 40     | H  | 0 | 3.545  | -4.192 | -1.379 | H  |
| HETATM | 41     | H  | 0 | 4.415  | -1.595 | 1.953  | H  |
| HETATM | 42     | C  | 0 | -3.613 | -2.395 | -1.357 | C  |
| HETATM | 43     | H  | 0 | -3.743 | -2.226 | -2.437 | H  |

|        |    |   |   |        |        |        |   |
|--------|----|---|---|--------|--------|--------|---|
| HETATM | 44 | H | 0 | -2.584 | -2.759 | -1.217 | H |
| HETATM | 45 | H | 0 | -4.310 | -3.206 | -1.064 | H |
| HETATM | 46 | C | 0 | -3.178 | 0.316  | 2.890  | C |
| HETATM | 47 | H | 0 | -3.065 | 1.380  | 3.152  | H |
| HETATM | 48 | H | 0 | -3.886 | -0.129 | 3.618  | H |
| HETATM | 49 | H | 0 | -2.194 | -0.154 | 3.030  | H |
| HETATM | 50 | C | 0 | -6.562 | 1.591  | -0.589 | C |
| HETATM | 51 | H | 0 | -6.195 | 2.399  | -1.250 | H |
| HETATM | 52 | H | 0 | -7.320 | 1.034  | -1.166 | H |
| HETATM | 53 | H | 0 | -7.069 | 2.081  | 0.260  | H |
| HETATM | 54 | C | 0 | 0.836  | -3.929 | -1.344 | C |
| HETATM | 55 | H | 0 | 1.323  | -4.614 | -2.057 | H |
| HETATM | 56 | H | 0 | 0.050  | -4.500 | -0.815 | H |
| HETATM | 57 | H | 0 | 0.307  | -3.146 | -1.924 | H |
| HETATM | 58 | C | 0 | 1.866  | -0.898 | 2.553  | C |
| HETATM | 59 | H | 0 | 1.006  | -1.288 | 3.128  | H |
| HETATM | 60 | H | 0 | 2.676  | -0.667 | 3.264  | H |
| HETATM | 61 | H | 0 | 1.510  | 0.055  | 2.116  | H |
| HETATM | 62 | C | 0 | 5.612  | -3.137 | 0.048  | C |
| HETATM | 63 | H | 0 | 6.211  | -2.852 | 0.929  | H |
| HETATM | 64 | H | 0 | 5.848  | -4.187 | -0.201 | H |
| HETATM | 65 | H | 0 | 5.978  | -2.527 | -0.801 | H |
| HETATM | 66 | C | 0 | 1.628  | 5.479  | -0.072 | C |
| HETATM | 67 | H | 0 | 1.279  | 6.344  | 0.518  | H |
| HETATM | 68 | H | 0 | 2.711  | 5.612  | -0.239 | H |
| HETATM | 69 | H | 0 | 1.126  | 5.521  | -1.054 | H |
| HETATM | 70 | C | 0 | 1.933  | 4.025  | 2.013  | C |
| HETATM | 71 | H | 0 | 3.027  | 4.168  | 2.011  | H |
| HETATM | 72 | H | 0 | 1.508  | 4.771  | 2.706  | H |
| HETATM | 73 | H | 0 | 1.703  | 3.025  | 2.418  | H |
| HETATM | 74 | H | 0 | -2.779 | -3.560 | 1.146  | H |
| HETATM | 75 | H | 0 | -0.513 | -4.323 | 1.357  | H |
| HETATM | 76 | C | 0 | -0.488 | 2.113  | -2.355 | C |
| HETATM | 77 | H | 0 | 0.490  | 2.605  | -2.330 | H |
| HETATM | 78 | H | 0 | -0.723 | 1.516  | -3.243 | H |
| HETATM | 79 | C | 0 | -1.427 | 2.367  | -1.395 | C |
| HETATM | 80 | H | 0 | -2.464 | 2.011  | -1.519 | H |
| HETATM | 81 | H | 0 | -1.258 | 3.087  | -0.587 | H |

END

## 1d.pdb

|        |        |    |   |        |        |        |    |
|--------|--------|----|---|--------|--------|--------|----|
| TITLE  | 1d.pdb |    |   |        |        |        |    |
| HETATM | 1      | Ru | 0 | 0.537  | 0.190  | 1.003  | Ru |
| HETATM | 2      | C  | 0 | 0.815  | -3.199 | -1.687 | C  |
| HETATM | 3      | C  | 0 | 2.276  | -2.910 | -1.377 | C  |
| HETATM | 4      | H  | 0 | 0.559  | -3.030 | -2.753 | H  |
| HETATM | 5      | H  | 0 | 2.922  | -2.885 | -2.272 | H  |
| HETATM | 6      | C  | 0 | 0.945  | -1.263 | -0.381 | C  |
| HETATM | 7      | N  | 0 | 2.207  | -1.587 | -0.751 | N  |
| HETATM | 8      | N  | 0 | 0.111  | -2.219 | -0.851 | N  |
| HETATM | 9      | Cl | 0 | 1.129  | 2.039  | -0.463 | Cl |
| HETATM | 10     | Cl | 0 | 0.573  | -1.709 | 2.585  | Cl |
| HETATM | 11     | C  | 0 | -1.297 | 0.289  | 1.497  | C  |
| HETATM | 12     | H  | 0 | -1.521 | -0.476 | 2.266  | H  |
| HETATM | 13     | C  | 0 | -2.534 | 0.902  | 1.039  | C  |
| HETATM | 14     | C  | 0 | -2.692 | 2.121  | 0.309  | C  |
| HETATM | 15     | C  | 0 | -3.696 | 0.149  | 1.325  | C  |
| HETATM | 16     | C  | 0 | -3.959 | 2.452  | -0.203 | C  |
| HETATM | 17     | C  | 0 | -4.949 | 0.502  | 0.844  | C  |
| HETATM | 18     | H  | 0 | -3.579 | -0.768 | 1.915  | H  |



|        |    |   |   |        |        |        |   |
|--------|----|---|---|--------|--------|--------|---|
| HETATM | 19 | C | 0 | -5.068 | 1.649  | 0.058  | C |
| HETATM | 20 | H | 0 | -4.096 | 3.366  | -0.783 | H |
| HETATM | 21 | H | 0 | -5.825 | -0.114 | 1.072  | H |
| HETATM | 22 | H | 0 | -6.045 | 1.947  | -0.342 | H |
| HETATM | 23 | O | 0 | -1.614 | 2.899  | 0.244  | O |
| HETATM | 24 | C | 0 | -1.474 | 4.073  | -0.585 | C |
| HETATM | 25 | H | 0 | -0.413 | 4.312  | -0.397 | H |
| HETATM | 26 | C | 0 | 3.351  | -0.736 | -0.643 | C |
| HETATM | 27 | C | 0 | 4.214  | -0.816 | 0.466  | C |
| HETATM | 28 | C | 0 | 3.619  | 0.146  | -1.709 | C |
| HETATM | 29 | C | 0 | 5.305  | 0.062  | 0.521  | C |
| HETATM | 30 | C | 0 | 4.726  | 0.990  | -1.621 | C |
| HETATM | 31 | C | 0 | 5.568  | 0.976  | -0.502 | C |
| HETATM | 32 | H | 0 | 5.974  | 0.015  | 1.390  | H |
| HETATM | 33 | H | 0 | 4.929  | 1.689  | -2.443 | H |
| HETATM | 34 | C | 0 | -1.314 | -2.208 | -0.825 | C |
| HETATM | 35 | C | 0 | -1.998 | -3.215 | -0.116 | C |
| HETATM | 36 | C | 0 | -2.017 | -1.257 | -1.592 | C |
| HETATM | 37 | C | 0 | -3.395 | -3.252 | -0.191 | C |
| HETATM | 38 | C | 0 | -3.411 | -1.344 | -1.651 | C |
| HETATM | 39 | C | 0 | -4.117 | -2.335 | -0.963 | C |
| HETATM | 40 | H | 0 | -3.933 | -4.026 | 0.372  | H |
| HETATM | 41 | H | 0 | -3.963 | -0.602 | -2.244 | H |
| HETATM | 42 | C | 0 | 4.014  | -1.840 | 1.541  | C |
| HETATM | 43 | H | 0 | 4.635  | -1.613 | 2.424  | H |
| HETATM | 44 | H | 0 | 2.964  | -1.917 | 1.875  | H |
| HETATM | 45 | H | 0 | 4.313  | -2.848 | 1.192  | H |
| HETATM | 46 | C | 0 | 2.713  | 0.198  | -2.900 | C |
| HETATM | 47 | H | 0 | 2.494  | -0.803 | -3.315 | H |
| HETATM | 48 | H | 0 | 1.748  | 0.659  | -2.620 | H |
| HETATM | 49 | H | 0 | 3.151  | 0.807  | -3.708 | H |
| HETATM | 50 | C | 0 | 6.718  | 1.932  | -0.402 | C |
| HETATM | 51 | H | 0 | 7.202  | 2.099  | -1.380 | H |
| HETATM | 52 | H | 0 | 6.383  | 2.924  | -0.044 | H |
| HETATM | 53 | H | 0 | 7.489  | 1.579  | 0.304  | H |
| HETATM | 54 | C | 0 | -1.257 | -4.237 | 0.692  | C |
| HETATM | 55 | H | 0 | -1.893 | -4.636 | 1.499  | H |
| HETATM | 56 | H | 0 | -0.953 | -5.106 | 0.076  | H |
| HETATM | 57 | H | 0 | -0.351 | -3.811 | 1.156  | H |
| HETATM | 58 | C | 0 | -1.297 | -0.166 | -2.321 | C |
| HETATM | 59 | H | 0 | -0.458 | -0.551 | -2.930 | H |
| HETATM | 60 | H | 0 | -1.980 | 0.384  | -2.991 | H |
| HETATM | 61 | H | 0 | -0.850 | 0.570  | -1.621 | H |
| HETATM | 62 | C | 0 | -5.611 | -2.417 | -1.051 | C |
| HETATM | 63 | H | 0 | -6.050 | -1.483 | -1.441 | H |
| HETATM | 64 | H | 0 | -5.937 | -3.235 | -1.723 | H |
| HETATM | 65 | H | 0 | -6.070 | -2.623 | -0.068 | H |
| HETATM | 66 | C | 0 | -2.306 | 5.244  | -0.094 | C |
| HETATM | 67 | H | 0 | -1.920 | 6.175  | -0.546 | H |
| HETATM | 68 | H | 0 | -3.377 | 5.181  | -0.347 | H |
| HETATM | 69 | H | 0 | -2.220 | 5.351  | 1.001  | H |
| HETATM | 70 | C | 0 | -1.602 | 3.749  | -2.059 | C |
| HETATM | 71 | H | 0 | -2.615 | 3.425  | -2.355 | H |
| HETATM | 72 | H | 0 | -1.354 | 4.645  | -2.655 | H |
| HETATM | 73 | H | 0 | -0.884 | 2.956  | -2.326 | H |
| HETATM | 74 | H | 0 | 2.712  | -3.641 | -0.667 | H |
| HETATM | 75 | H | 0 | 0.509  | -4.226 | -1.427 | H |
| HETATM | 76 | C | 0 | -0.022 | 1.642  | 2.723  | C |
| HETATM | 77 | H | 0 | -0.407 | 2.571  | 2.287  | H |
| HETATM | 78 | H | 0 | -0.596 | 1.211  | 3.554  | H |
| HETATM | 79 | C | 0 | 1.351  | 1.336  | 2.625  | C |
| HETATM | 80 | H | 0 | 1.801  | 0.640  | 3.346  | H |

|        |    |   |   |       |       |       |   |
|--------|----|---|---|-------|-------|-------|---|
| HETATM | 81 | H | 0 | 2.021 | 2.059 | 2.140 | H |
| END    |    |   |   |       |       |       |   |

## 1I.pdb

| TITLE  | 1I.pdb |    |   |        |        |        |    |
|--------|--------|----|---|--------|--------|--------|----|
| HETATM | 1      | Ru | 0 | 0.524  | -0.589 | -0.370 | Ru |
| HETATM | 2      | C  | 0 | 1.367  | 3.390  | 0.979  | C  |
| HETATM | 3      | C  | 0 | 2.770  | 2.791  | 1.078  | C  |
| HETATM | 4      | H  | 0 | 0.995  | 3.789  | 1.940  | H  |
| HETATM | 5      | H  | 0 | 3.158  | 2.762  | 2.115  | H  |
| HETATM | 6      | C  | 0 | 1.295  | 1.151  | 0.310  | C  |
| HETATM | 7      | N  | 0 | 2.587  | 1.426  | 0.573  | N  |
| HETATM | 8      | N  | 0 | 0.552  | 2.246  | 0.559  | N  |
| HETATM | 9      | Cl | 0 | -0.419 | -1.121 | 1.787  | Cl |
| HETATM | 10     | Cl | 0 | 1.739  | -0.055 | -2.451 | Cl |
| HETATM | 11     | C  | 0 | -0.880 | -1.270 | -1.673 | C  |
| HETATM | 12     | H  | 0 | -0.518 | -0.990 | -2.674 | H  |
| HETATM | 13     | C  | 0 | -2.333 | -1.049 | -1.595 | C  |
| HETATM | 14     | C  | 0 | -3.250 | -1.595 | -0.651 | C  |
| HETATM | 15     | C  | 0 | -2.858 | -0.215 | -2.606 | C  |
| HETATM | 16     | C  | 0 | -4.615 | -1.280 | -0.757 | C  |
| HETATM | 17     | C  | 0 | -4.207 | 0.102  | -2.695 | C  |
| HETATM | 18     | H  | 0 | -2.154 | 0.198  | -3.341 | H  |
| HETATM | 19     | C  | 0 | -5.089 | -0.437 | -1.758 | C  |
| HETATM | 20     | H  | 0 | -5.327 | -1.730 | -0.062 | H  |
| HETATM | 21     | H  | 0 | -4.570 | 0.760  | -3.493 | H  |
| HETATM | 22     | H  | 0 | -6.162 | -0.217 | -1.811 | H  |
| HETATM | 23     | O  | 0 | -2.760 | -2.454 | 0.255  | O  |
| HETATM | 24     | C  | 0 | -3.359 | -2.697 | 1.547  | C  |
| HETATM | 25     | H  | 0 | -2.481 | -3.058 | 2.110  | H  |
| HETATM | 26     | C  | 0 | 3.673  | 0.509  | 0.429  | C  |
| HETATM | 27     | C  | 0 | 4.545  | 0.627  | -0.669 | C  |
| HETATM | 28     | C  | 0 | 3.871  | -0.479 | 1.412  | C  |
| HETATM | 29     | C  | 0 | 5.569  | -0.315 | -0.809 | C  |
| HETATM | 30     | C  | 0 | 4.906  | -1.403 | 1.231  | C  |
| HETATM | 31     | C  | 0 | 5.751  | -1.348 | 0.118  | C  |
| HETATM | 32     | H  | 0 | 6.238  | -0.243 | -1.677 | H  |
| HETATM | 33     | H  | 0 | 5.060  | -2.180 | 1.991  | H  |
| HETATM | 34     | C  | 0 | -0.875 | 2.292  | 0.509  | C  |
| HETATM | 35     | C  | 0 | -1.516 | 2.501  | -0.725 | C  |
| HETATM | 36     | C  | 0 | -1.611 | 2.166  | 1.704  | C  |
| HETATM | 37     | C  | 0 | -2.914 | 2.565  | -0.746 | C  |
| HETATM | 38     | C  | 0 | -3.005 | 2.217  | 1.631  | C  |
| HETATM | 39     | C  | 0 | -3.673 | 2.409  | 0.416  | C  |
| HETATM | 40     | H  | 0 | -3.421 | 2.730  | -1.705 | H  |
| HETATM | 41     | H  | 0 | -3.587 | 2.092  | 2.555  | H  |
| HETATM | 42     | C  | 0 | 4.419  | 1.746  | -1.658 | C  |
| HETATM | 43     | H  | 0 | 4.714  | 1.416  | -2.667 | H  |
| HETATM | 44     | H  | 0 | 3.385  | 2.119  | -1.735 | H  |
| HETATM | 45     | H  | 0 | 5.079  | 2.596  | -1.389 | H  |
| HETATM | 46     | C  | 0 | 3.014  | -0.536 | 2.638  | C  |
| HETATM | 47     | H  | 0 | 2.880  | 0.462  | 3.096  | H  |
| HETATM | 48     | H  | 0 | 1.994  | -0.912 | 2.428  | H  |
| HETATM | 49     | H  | 0 | 3.458  | -1.197 | 3.400  | H  |
| HETATM | 50     | C  | 0 | 6.822  | -2.376 | -0.089 | C  |
| HETATM | 51     | H  | 0 | 6.491  | -3.159 | -0.798 | H  |
| HETATM | 52     | H  | 0 | 7.741  | -1.937 | -0.515 | H  |
| HETATM | 53     | H  | 0 | 7.091  | -2.888 | 0.851  | H  |
| HETATM | 54     | C  | 0 | -0.725 | 2.655  | -1.988 | C  |
| HETATM | 55     | H  | 0 | -1.375 | 2.944  | -2.831 | H  |

|        |    |   |   |        |        |        |   |
|--------|----|---|---|--------|--------|--------|---|
| HETATM | 56 | H | 0 | 0.065  | 3.424  | -1.894 | H |
| HETATM | 57 | H | 0 | -0.196 | 1.723  | -2.273 | H |
| HETATM | 58 | C | 0 | -0.931 | 2.004  | 3.029  | C |
| HETATM | 59 | H | 0 | -0.761 | 2.982  | 3.522  | H |
| HETATM | 60 | H | 0 | -1.548 | 1.401  | 3.717  | H |
| HETATM | 61 | H | 0 | 0.040  | 1.491  | 2.940  | H |
| HETATM | 62 | C | 0 | -5.171 | 2.447  | 0.377  | C |
| HETATM | 63 | H | 0 | -5.605 | 1.500  | 0.748  | H |
| HETATM | 64 | H | 0 | -5.579 | 3.250  | 1.018  | H |
| HETATM | 65 | H | 0 | -5.553 | 2.606  | -0.646 | H |
| HETATM | 66 | C | 0 | -4.376 | -3.821 | 1.483  | C |
| HETATM | 67 | H | 0 | -4.656 | -4.129 | 2.506  | H |
| HETATM | 68 | H | 0 | -5.306 | -3.537 | 0.959  | H |
| HETATM | 69 | H | 0 | -3.955 | -4.703 | 0.971  | H |
| HETATM | 70 | C | 0 | -3.847 | -1.441 | 2.243  | C |
| HETATM | 71 | H | 0 | -4.835 | -1.090 | 1.900  | H |
| HETATM | 72 | H | 0 | -3.931 | -1.644 | 3.326  | H |
| HETATM | 73 | H | 0 | -3.114 | -0.627 | 2.113  | H |
| HETATM | 74 | H | 0 | 3.514  | 3.327  | 0.462  | H |
| HETATM | 75 | H | 0 | 1.294  | 4.203  | 0.232  | H |
| HETATM | 76 | C | 0 | -0.146 | -2.577 | -1.200 | C |
| HETATM | 77 | H | 0 | -0.802 | -3.167 | -0.549 | H |
| HETATM | 78 | H | 0 | 0.067  | -3.084 | -2.158 | H |
| HETATM | 79 | C | 0 | 1.267  | -2.398 | -0.547 | C |
| HETATM | 80 | H | 0 | 2.111  | -2.518 | -1.245 | H |
| HETATM | 81 | H | 0 | 1.373  | -2.950 | 0.402  | H |

END

## 1e.pdb

|        |        |    |   |        |        |        |    |
|--------|--------|----|---|--------|--------|--------|----|
| TITLE  | 1e.pdb |    |   |        |        |        |    |
| HETATM | 1      | Ru | 0 | -0.526 | -0.716 | 0.318  | Ru |
| HETATM | 2      | C  | 0 | -1.222 | 3.427  | -0.759 | C  |
| HETATM | 3      | C  | 0 | -2.644 | 2.886  | -0.875 | C  |
| HETATM | 4      | H  | 0 | -0.848 | 3.874  | -1.698 | H  |
| HETATM | 5      | H  | 0 | -3.048 | 2.946  | -1.904 | H  |
| HETATM | 6      | C  | 0 | -1.214 | 1.140  | -0.237 | C  |
| HETATM | 7      | N  | 0 | -2.499 | 1.484  | -0.470 | N  |
| HETATM | 8      | N  | 0 | -0.444 | 2.230  | -0.426 | N  |
| HETATM | 9      | Cl | 0 | 0.443  | -0.983 | -1.905 | Cl |
| HETATM | 10     | Cl | 0 | -1.596 | -0.297 | 2.496  | Cl |
| HETATM | 11     | C  | 0 | 0.756  | -1.997 | 1.562  | C  |
| HETATM | 12     | H  | 0 | 0.287  | -1.947 | 2.554  | H  |
| HETATM | 13     | C  | 0 | 2.107  | -1.419 | 1.572  | C  |
| HETATM | 14     | C  | 0 | 3.138  | -1.677 | 0.625  | C  |
| HETATM | 15     | C  | 0 | 2.409  | -0.611 | 2.688  | C  |
| HETATM | 16     | C  | 0 | 4.416  | -1.137 | 0.847  | C  |
| HETATM | 17     | C  | 0 | 3.674  | -0.075 | 2.891  | C  |
| HETATM | 18     | H  | 0 | 1.603  | -0.417 | 3.407  | H  |
| HETATM | 19     | C  | 0 | 4.679  | -0.347 | 1.963  | C  |
| HETATM | 20     | H  | 0 | 5.229  | -1.368 | 0.155  | H  |
| HETATM | 21     | H  | 0 | 3.877  | 0.548  | 3.770  | H  |
| HETATM | 22     | H  | 0 | 5.691  | 0.053  | 2.107  | H  |
| HETATM | 23     | O  | 0 | 2.831  | -2.506 | -0.382 | O  |
| HETATM | 24     | C  | 0 | 3.539  | -2.570 | -1.637 | C  |
| HETATM | 25     | H  | 0 | 2.754  | -2.990 | -2.290 | H  |
| HETATM | 26     | C  | 0 | -3.628 | 0.615  | -0.385 | C  |
| HETATM | 27     | C  | 0 | -4.469 | 0.672  | 0.740  | C  |
| HETATM | 28     | C  | 0 | -3.901 | -0.260 | -1.456 | C  |
| HETATM | 29     | C  | 0 | -5.549 | -0.217 | 0.808  | C  |
| HETATM | 30     | C  | 0 | -4.987 | -1.134 | -1.344 | C  |

|        |    |   |   |        |        |        |   |
|--------|----|---|---|--------|--------|--------|---|
| HETATM | 31 | C | 0 | -5.811 | -1.137 | -0.212 | C |
| HETATM | 32 | H | 0 | -6.197 | -0.192 | 1.694  | H |
| HETATM | 33 | H | 0 | -5.199 | -1.824 | -2.172 | H |
| HETATM | 34 | C | 0 | 0.983  | 2.265  | -0.381 | C |
| HETATM | 35 | C | 0 | 1.632  | 2.392  | 0.862  | C |
| HETATM | 36 | C | 0 | 1.711  | 2.256  | -1.586 | C |
| HETATM | 37 | C | 0 | 3.028  | 2.490  | 0.877  | C |
| HETATM | 38 | C | 0 | 3.106  | 2.339  | -1.521 | C |
| HETATM | 39 | C | 0 | 3.780  | 2.448  | -0.301 | C |
| HETATM | 40 | H | 0 | 3.538  | 2.602  | 1.841  | H |
| HETATM | 41 | H | 0 | 3.681  | 2.311  | -2.457 | H |
| HETATM | 42 | C | 0 | -4.261 | 1.679  | 1.830  | C |
| HETATM | 43 | H | 0 | -4.543 | 1.264  | 2.811  | H |
| HETATM | 44 | H | 0 | -3.211 | 2.000  | 1.908  | H |
| HETATM | 45 | H | 0 | -4.889 | 2.577  | 1.665  | H |
| HETATM | 46 | C | 0 | -3.060 | -0.239 | -2.695 | C |
| HETATM | 47 | H | 0 | -3.057 | 0.760  | -3.170 | H |
| HETATM | 48 | H | 0 | -1.999 | -0.489 | -2.497 | H |
| HETATM | 49 | H | 0 | -3.437 | -0.956 | -3.443 | H |
| HETATM | 50 | C | 0 | -6.944 | -2.111 | -0.091 | C |
| HETATM | 51 | H | 0 | -6.633 | -3.023 | 0.455  | H |
| HETATM | 52 | H | 0 | -7.795 | -1.688 | 0.468  | H |
| HETATM | 53 | H | 0 | -7.312 | -2.441 | -1.077 | H |
| HETATM | 54 | C | 0 | 0.850  | 2.455  | 2.138  | C |
| HETATM | 55 | H | 0 | 1.520  | 2.566  | 3.007  | H |
| HETATM | 56 | H | 0 | 0.145  | 3.309  | 2.149  | H |
| HETATM | 57 | H | 0 | 0.231  | 1.552  | 2.306  | H |
| HETATM | 58 | C | 0 | 1.030  | 2.195  | -2.920 | C |
| HETATM | 59 | H | 0 | 0.930  | 3.203  | -3.370 | H |
| HETATM | 60 | H | 0 | 1.612  | 1.582  | -3.630 | H |
| HETATM | 61 | H | 0 | 0.027  | 1.742  | -2.859 | H |
| HETATM | 62 | C | 0 | 5.277  | 2.492  | -0.258 | C |
| HETATM | 63 | H | 0 | 5.707  | 1.478  | -0.372 | H |
| HETATM | 64 | H | 0 | 5.699  | 3.106  | -1.074 | H |
| HETATM | 65 | H | 0 | 5.652  | 2.892  | 0.700  | H |
| HETATM | 66 | C | 0 | 4.685  | -3.561 | -1.565 | C |
| HETATM | 67 | H | 0 | 5.098  | -3.733 | -2.575 | H |
| HETATM | 68 | H | 0 | 5.513  | -3.209 | -0.925 | H |
| HETATM | 69 | H | 0 | 4.343  | -4.533 | -1.171 | H |
| HETATM | 70 | C | 0 | 3.918  | -1.217 | -2.213 | C |
| HETATM | 71 | H | 0 | 4.874  | -0.819 | -1.831 | H |
| HETATM | 72 | H | 0 | 4.025  | -1.315 | -3.308 | H |
| HETATM | 73 | H | 0 | 3.118  | -0.482 | -2.024 | H |
| HETATM | 74 | H | 0 | -3.360 | 3.401  | -0.210 | H |
| HETATM | 75 | H | 0 | -1.108 | 4.187  | 0.037  | H |
| HETATM | 76 | C | 0 | 0.127  | -2.901 | 0.666  | C |
| HETATM | 77 | H | 0 | 0.614  | -3.222 | -0.260 | H |
| HETATM | 78 | H | 0 | -0.569 | -3.618 | 1.124  | H |
| HETATM | 79 | C | 0 | -1.749 | -2.053 | -0.013 | C |
| HETATM | 80 | H | 0 | -2.518 | -2.347 | 0.731  | H |
| HETATM | 81 | H | 0 | -1.796 | -2.578 | -0.990 | H |

END

## 1f.pdb

|        |        |    |   |        |        |        |    |
|--------|--------|----|---|--------|--------|--------|----|
| TITLE  | 1f.pdb |    |   |        |        |        |    |
| HETATM | 1      | Ru | 0 | -0.520 | -0.791 | 0.393  | Ru |
| HETATM | 2      | C  | 0 | -1.219 | 3.293  | -0.766 | C  |
| HETATM | 3      | C  | 0 | -2.665 | 2.836  | -0.622 | C  |
| HETATM | 4      | H  | 0 | -0.959 | 3.582  | -1.803 | H  |
| HETATM | 5      | H  | 0 | -3.269 | 3.004  | -1.532 | H  |

|        |    |    |   |        |        |        |    |
|--------|----|----|---|--------|--------|--------|----|
| HETATM | 6  | C  | 0 | -1.241 | 1.013  | -0.191 | C  |
| HETATM | 7  | N  | 0 | -2.531 | 1.401  | -0.361 | N  |
| HETATM | 8  | N  | 0 | -0.460 | 2.103  | -0.378 | N  |
| HETATM | 9  | Cl | 0 | 0.228  | -1.322 | -1.869 | Cl |
| HETATM | 10 | Cl | 0 | -1.218 | -0.123 | 2.657  | Cl |
| HETATM | 11 | C  | 0 | 0.978  | -2.156 | 1.706  | C  |
| HETATM | 12 | C  | 0 | 2.227  | -1.387 | 1.656  | C  |
| HETATM | 13 | C  | 0 | 3.246  | -1.555 | 0.672  | C  |
| HETATM | 14 | C  | 0 | 2.469  | -0.508 | 2.731  | C  |
| HETATM | 15 | C  | 0 | 4.463  | -0.871 | 0.831  | C  |
| HETATM | 16 | C  | 0 | 3.670  | 0.176  | 2.867  | C  |
| HETATM | 17 | H  | 0 | 1.668  | -0.377 | 3.471  | H  |
| HETATM | 18 | C  | 0 | 4.669  | -0.019 | 1.913  | C  |
| HETATM | 19 | H  | 0 | 5.272  | -1.023 | 0.114  | H  |
| HETATM | 20 | H  | 0 | 3.828  | 0.856  | 3.712  | H  |
| HETATM | 21 | H  | 0 | 5.632  | 0.500  | 2.006  | H  |
| HETATM | 22 | O  | 0 | 2.988  | -2.435 | -0.304 | O  |
| HETATM | 23 | C  | 0 | 3.694  | -2.517 | -1.557 | C  |
| HETATM | 24 | H  | 0 | 2.982  | -3.121 | -2.148 | H  |
| HETATM | 25 | C  | 0 | -3.693 | 0.578  | -0.330 | C  |
| HETATM | 26 | C  | 0 | -4.555 | 0.613  | 0.784  | C  |
| HETATM | 27 | C  | 0 | -4.004 | -0.197 | -1.467 | C  |
| HETATM | 28 | C  | 0 | -5.695 | -0.199 | 0.765  | C  |
| HETATM | 29 | C  | 0 | -5.152 | -0.994 | -1.440 | C  |
| HETATM | 30 | C  | 0 | -6.001 | -1.018 | -0.327 | C  |
| HETATM | 31 | H  | 0 | -6.361 | -0.191 | 1.638  | H  |
| HETATM | 32 | H  | 0 | -5.394 | -1.605 | -2.320 | H  |
| HETATM | 33 | C  | 0 | 0.966  | 2.129  | -0.461 | C  |
| HETATM | 34 | C  | 0 | 1.716  | 2.445  | 0.691  | C  |
| HETATM | 35 | C  | 0 | 1.585  | 1.995  | -1.719 | C  |
| HETATM | 36 | C  | 0 | 3.101  | 2.585  | 0.564  | C  |
| HETATM | 37 | C  | 0 | 2.977  | 2.121  | -1.791 | C  |
| HETATM | 38 | C  | 0 | 3.749  | 2.407  | -0.663 | C  |
| HETATM | 39 | H  | 0 | 3.690  | 2.837  | 1.455  | H  |
| HETATM | 40 | H  | 0 | 3.468  | 1.995  | -2.766 | H  |
| HETATM | 41 | C  | 0 | -4.284 | 1.505  | 1.955  | C  |
| HETATM | 42 | H  | 0 | -4.711 | 1.086  | 2.881  | H  |
| HETATM | 43 | H  | 0 | -3.203 | 1.642  | 2.126  | H  |
| HETATM | 44 | H  | 0 | -4.745 | 2.504  | 1.816  | H  |
| HETATM | 45 | C  | 0 | -3.126 | -0.150 | -2.678 | C  |
| HETATM | 46 | H  | 0 | -2.977 | 0.888  | -3.034 | H  |
| HETATM | 47 | H  | 0 | -2.115 | -0.556 | -2.479 | H  |
| HETATM | 48 | H  | 0 | -3.562 | -0.728 | -3.509 | H  |
| HETATM | 49 | C  | 0 | -7.205 | -1.911 | -0.300 | C  |
| HETATM | 50 | H  | 0 | -6.985 | -2.866 | 0.214  | H  |
| HETATM | 51 | H  | 0 | -8.049 | -1.450 | 0.241  | H  |
| HETATM | 52 | H  | 0 | -7.550 | -2.169 | -1.316 | H  |
| HETATM | 53 | C  | 0 | 1.046  | 2.654  | 2.013  | C  |
| HETATM | 54 | H  | 0 | 1.776  | 2.954  | 2.784  | H  |
| HETATM | 55 | H  | 0 | 0.268  | 3.440  | 1.964  | H  |
| HETATM | 56 | H  | 0 | 0.528  | 1.743  | 2.369  | H  |
| HETATM | 57 | C  | 0 | 0.796  | 1.792  | -2.977 | C  |
| HETATM | 58 | H  | 0 | 0.663  | 2.750  | -3.520 | H  |
| HETATM | 59 | H  | 0 | 1.319  | 1.105  | -3.663 | H  |
| HETATM | 60 | H  | 0 | -0.198 | 1.357  | -2.793 | H  |
| HETATM | 61 | C  | 0 | 5.242  | 2.488  | -0.756 | C  |
| HETATM | 62 | H  | 0 | 5.703  | 1.496  | -0.581 | H  |
| HETATM | 63 | H  | 0 | 5.581  | 2.824  | -1.752 | H  |
| HETATM | 64 | H  | 0 | 5.669  | 3.171  | -0.000 | H  |
| HETATM | 65 | C  | 0 | 4.984  | -3.306 | -1.429 | C  |
| HETATM | 66 | H  | 0 | 5.372  | -3.548 | -2.434 | H  |
| HETATM | 67 | H  | 0 | 5.779  | -2.759 | -0.894 | H  |

|        |    |   |   |        |        |        |   |
|--------|----|---|---|--------|--------|--------|---|
| HETATM | 68 | H | 0 | 4.811  | -4.258 | -0.899 | H |
| HETATM | 69 | C | 0 | 3.828  | -1.181 | -2.262 | C |
| HETATM | 70 | H | 0 | 4.607  | -0.526 | -1.838 | H |
| HETATM | 71 | H | 0 | 4.087  | -1.357 | -3.321 | H |
| HETATM | 72 | H | 0 | 2.862  | -0.649 | -2.231 | H |
| HETATM | 73 | H | 0 | -3.188 | 3.328  | 0.220  | H |
| HETATM | 74 | H | 0 | -0.962 | 4.145  | -0.112 | H |
| HETATM | 75 | C | 0 | 0.429  | -3.035 | 0.805  | C |
| HETATM | 76 | H | 0 | 0.870  | -3.268 | -0.165 | H |
| HETATM | 77 | C | 0 | -2.069 | -1.725 | 0.247  | C |
| HETATM | 78 | H | 0 | -2.844 | -1.736 | 1.043  | H |
| HETATM | 79 | H | 0 | -2.259 | -2.391 | -0.625 | H |
| HETATM | 80 | H | 0 | 0.479  | -2.084 | 2.681  | H |
| HETATM | 81 | H | 0 | -0.418 | -3.650 | 1.130  | H |

END

## s2a.pdb

| TITLE  | s2a.pdb |    |   |        |        |        |    |
|--------|---------|----|---|--------|--------|--------|----|
| HETATM | 1       | Ru | 0 | 0.125  | 0.317  | -0.098 | Ru |
| HETATM | 2       | C  | 0 | 0.794  | -3.797 | 0.911  | C  |
| HETATM | 3       | C  | 0 | -0.671 | -3.814 | 0.528  | C  |
| HETATM | 4       | H  | 0 | 0.952  | -3.917 | 2.001  | H  |
| HETATM | 5       | H  | 0 | -1.327 | -4.234 | 1.310  | H  |
| HETATM | 6       | C  | 0 | 0.170  | -1.628 | 0.192  | C  |
| HETATM | 7       | N  | 0 | -0.962 | -2.400 | 0.312  | N  |
| HETATM | 8       | N  | 0 | 1.218  | -2.465 | 0.482  | N  |
| HETATM | 9       | Cl | 0 | -0.358 | 0.715  | 2.199  | Cl |
| HETATM | 10      | Cl | 0 | -0.617 | 0.403  | -2.344 | Cl |
| HETATM | 11      | C  | 0 | 1.921  | 0.678  | -0.332 | C  |
| HETATM | 12      | H  | 0 | 2.704  | -0.089 | -0.409 | H  |
| HETATM | 13      | C  | 0 | 2.406  | 2.024  | -0.517 | C  |
| HETATM | 14      | C  | 0 | 1.498  | 3.109  | -0.455 | C  |
| HETATM | 15      | C  | 0 | 3.769  | 2.287  | -0.763 | C  |
| HETATM | 16      | C  | 0 | 1.950  | 4.417  | -0.638 | C  |
| HETATM | 17      | C  | 0 | 4.220  | 3.590  | -0.938 | C  |
| HETATM | 18      | H  | 0 | 4.464  | 1.439  | -0.809 | H  |
| HETATM | 19      | C  | 0 | 3.308  | 4.648  | -0.875 | C  |
| HETATM | 20      | H  | 0 | 1.257  | 5.262  | -0.614 | H  |
| HETATM | 21      | H  | 0 | 5.280  | 3.789  | -1.128 | H  |
| HETATM | 22      | H  | 0 | 3.652  | 5.678  | -1.021 | H  |
| HETATM | 23      | O  | 0 | 0.219  | 2.720  | -0.246 | O  |
| HETATM | 24      | C  | 0 | -0.831 | 3.600  | 0.246  | C  |
| HETATM | 25      | H  | 0 | -1.581 | 2.849  | 0.531  | H  |
| HETATM | 26      | C  | 0 | -2.294 | -2.084 | -0.097 | C  |
| HETATM | 27      | C  | 0 | -2.658 | -2.219 | -1.452 | C  |
| HETATM | 28      | C  | 0 | -3.271 | -1.846 | 0.893  | C  |
| HETATM | 29      | C  | 0 | -3.995 | -2.005 | -1.809 | C  |
| HETATM | 30      | C  | 0 | -4.599 | -1.669 | 0.493  | C  |
| HETATM | 31      | C  | 0 | -4.976 | -1.720 | -0.854 | C  |
| HETATM | 32      | H  | 0 | -4.277 | -2.081 | -2.867 | H  |
| HETATM | 33      | H  | 0 | -5.358 | -1.464 | 1.259  | H  |
| HETATM | 34      | C  | 0 | 2.615  | -2.212 | 0.397  | C  |
| HETATM | 35      | C  | 0 | 3.251  | -2.392 | -0.846 | C  |
| HETATM | 36      | C  | 0 | 3.340  | -1.826 | 1.537  | C  |
| HETATM | 37      | C  | 0 | 4.629  | -2.174 | -0.932 | C  |
| HETATM | 38      | C  | 0 | 4.717  | -1.614 | 1.409  | C  |
| HETATM | 39      | C  | 0 | 5.377  | -1.780 | 0.185  | C  |
| HETATM | 40      | H  | 0 | 5.130  | -2.306 | -1.900 | H  |
| HETATM | 41      | H  | 0 | 5.290  | -1.303 | 2.293  | H  |
| HETATM | 42      | C  | 0 | -1.683 | -2.678 | -2.493 | C  |

|        |    |   |   |        |        |        |   |
|--------|----|---|---|--------|--------|--------|---|
| HETATM | 43 | H | 0 | -1.873 | -2.187 | -3.462 | H |
| HETATM | 44 | H | 0 | -0.638 | -2.462 | -2.225 | H |
| HETATM | 45 | H | 0 | -1.778 | -3.770 | -2.658 | H |
| HETATM | 46 | C | 0 | -2.906 | -1.828 | 2.345  | C |
| HETATM | 47 | H | 0 | -3.758 | -1.502 | 2.964  | H |
| HETATM | 48 | H | 0 | -2.611 | -2.834 | 2.701  | H |
| HETATM | 49 | H | 0 | -2.054 | -1.156 | 2.549  | H |
| HETATM | 50 | C | 0 | -6.390 | -1.443 | -1.263 | C |
| HETATM | 51 | H | 0 | -6.556 | -0.357 | -1.403 | H |
| HETATM | 52 | H | 0 | -6.648 | -1.930 | -2.219 | H |
| HETATM | 53 | H | 0 | -7.115 | -1.776 | -0.500 | H |
| HETATM | 54 | C | 0 | 2.442  | -2.729 | -2.060 | C |
| HETATM | 55 | H | 0 | 3.086  | -2.940 | -2.930 | H |
| HETATM | 56 | H | 0 | 1.787  | -3.606 | -1.903 | H |
| HETATM | 57 | H | 0 | 1.772  | -1.890 | -2.335 | H |
| HETATM | 58 | C | 0 | 2.643  | -1.597 | 2.842  | C |
| HETATM | 59 | H | 0 | 2.207  | -2.527 | 3.253  | H |
| HETATM | 60 | H | 0 | 3.338  | -1.201 | 3.601  | H |
| HETATM | 61 | H | 0 | 1.808  | -0.879 | 2.738  | H |
| HETATM | 62 | C | 0 | 6.846  | -1.507 | 0.067  | C |
| HETATM | 63 | H | 0 | 7.392  | -1.777 | 0.986  | H |
| HETATM | 64 | H | 0 | 7.303  | -2.055 | -0.775 | H |
| HETATM | 65 | H | 0 | 7.042  | -0.432 | -0.110 | H |
| HETATM | 66 | C | 0 | -1.405 | 4.451  | -0.868 | C |
| HETATM | 67 | H | 0 | -2.389 | 4.842  | -0.554 | H |
| HETATM | 68 | H | 0 | -0.776 | 5.318  | -1.133 | H |
| HETATM | 69 | H | 0 | -1.554 | 3.845  | -1.778 | H |
| HETATM | 70 | C | 0 | -0.434 | 4.339  | 1.504  | C |
| HETATM | 71 | H | 0 | 0.265  | 5.175  | 1.334  | H |
| HETATM | 72 | H | 0 | -1.347 | 4.762  | 1.961  | H |
| HETATM | 73 | H | 0 | 0.012  | 3.640  | 2.230  | H |
| HETATM | 74 | H | 0 | -0.861 | -4.384 | -0.406 | H |
| HETATM | 75 | H | 0 | 1.391  | -4.575 | 0.403  | H |
| HETATM | 76 | C | 0 | -3.491 | 1.467  | -0.440 | C |
| HETATM | 77 | H | 0 | -3.285 | 2.208  | -1.216 | H |
| HETATM | 78 | H | 0 | -3.332 | 0.408  | -0.658 | H |
| HETATM | 79 | C | 0 | -3.889 | 1.871  | 0.758  | C |
| HETATM | 80 | F | 0 | -4.154 | 1.105  | 1.793  | F |
| HETATM | 81 | F | 0 | -4.053 | 3.141  | 1.100  | F |

END

## s2b.pdb

| TITLE  | s2b.pdb |    |   |        |        |        |    |
|--------|---------|----|---|--------|--------|--------|----|
| HETATM | 1       | Ru | 0 | -0.286 | 0.179  | -0.354 | Ru |
| HETATM | 2       | C  | 0 | 0.022  | -3.747 | 1.298  | C  |
| HETATM | 3       | C  | 0 | -1.478 | -3.584 | 1.115  | C  |
| HETATM | 4       | H  | 0 | 0.327  | -3.740 | 2.364  | H  |
| HETATM | 5       | H  | 0 | -2.050 | -3.726 | 2.049  | H  |
| HETATM | 6       | C  | 0 | -0.392 | -1.647 | 0.309  | C  |
| HETATM | 7       | N  | 0 | -1.593 | -2.208 | 0.647  | N  |
| HETATM | 8       | N  | 0 | 0.568  | -2.570 | 0.620  | N  |
| HETATM | 9       | Cl | 0 | -0.730 | 1.048  | 1.823  | Cl |
| HETATM | 10      | Cl | 0 | -0.785 | -0.422 | -2.631 | Cl |
| HETATM | 11      | C  | 0 | 1.527  | 0.211  | -0.723 | C  |
| HETATM | 12      | H  | 0 | 1.956  | -0.730 | -1.109 | H  |
| HETATM | 13      | C  | 0 | 2.522  | 1.260  | -0.736 | C  |
| HETATM | 14      | C  | 0 | 2.286  | 2.603  | -0.324 | C  |
| HETATM | 15      | C  | 0 | 3.835  | 0.901  | -1.126 | C  |
| HETATM | 16      | C  | 0 | 3.355  | 3.511  | -0.288 | C  |
| HETATM | 17      | C  | 0 | 4.885  | 1.806  | -1.089 | C  |

|        |    |   |   |        |        |        |   |
|--------|----|---|---|--------|--------|--------|---|
| HETATM | 18 | H | 0 | 4.007  | -0.134 | -1.448 | H |
| HETATM | 19 | C | 0 | 4.637  | 3.115  | -0.663 | C |
| HETATM | 20 | H | 0 | 3.183  | 4.546  | 0.014  | H |
| HETATM | 21 | H | 0 | 5.893  | 1.502  | -1.393 | H |
| HETATM | 22 | H | 0 | 5.452  | 3.848  | -0.633 | H |
| HETATM | 23 | O | 0 | 1.016  | 2.918  | -0.037 | O |
| HETATM | 24 | C | 0 | 0.649  | 3.927  | 0.944  | C |
| HETATM | 25 | H | 0 | -0.374 | 3.604  | 1.190  | H |
| HETATM | 26 | C | 0 | -2.878 | -1.637 | 0.403  | C |
| HETATM | 27 | C | 0 | -3.498 | -1.827 | -0.851 | C |
| HETATM | 28 | C | 0 | -3.561 | -0.990 | 1.454  | C |
| HETATM | 29 | C | 0 | -4.739 | -1.224 | -1.078 | C |
| HETATM | 30 | C | 0 | -4.804 | -0.410 | 1.182  | C |
| HETATM | 31 | C | 0 | -5.389 | -0.485 | -0.085 | C |
| HETATM | 32 | H | 0 | -5.212 | -1.343 | -2.062 | H |
| HETATM | 33 | H | 0 | -5.327 | 0.120  | 1.990  | H |
| HETATM | 34 | C | 0 | 1.981  | -2.488 | 0.473  | C |
| HETATM | 35 | C | 0 | 2.564  | -3.105 | -0.651 | C |
| HETATM | 36 | C | 0 | 2.769  | -1.843 | 1.441  | C |
| HETATM | 37 | C | 0 | 3.954  | -3.069 | -0.790 | C |
| HETATM | 38 | C | 0 | 4.158  | -1.828 | 1.263  | C |
| HETATM | 39 | C | 0 | 4.766  | -2.430 | 0.157  | C |
| HETATM | 40 | H | 0 | 4.414  | -3.537 | -1.671 | H |
| HETATM | 41 | H | 0 | 4.780  | -1.316 | 2.009  | H |
| HETATM | 42 | C | 0 | -2.922 | -2.741 | -1.890 | C |
| HETATM | 43 | H | 0 | -3.092 | -2.353 | -2.908 | H |
| HETATM | 44 | H | 0 | -1.837 | -2.888 | -1.783 | H |
| HETATM | 45 | H | 0 | -3.411 | -3.735 | -1.833 | H |
| HETATM | 46 | C | 0 | -3.041 | -0.987 | 2.859  | C |
| HETATM | 47 | H | 0 | -3.161 | 0.003  | 3.330  | H |
| HETATM | 48 | H | 0 | -3.608 | -1.712 | 3.477  | H |
| HETATM | 49 | H | 0 | -1.973 | -1.242 | 2.922  | H |
| HETATM | 50 | C | 0 | -6.667 | 0.237  | -0.381 | C |
| HETATM | 51 | H | 0 | -6.460 | 1.269  | -0.726 | H |
| HETATM | 52 | H | 0 | -7.247 | -0.254 | -1.181 | H |
| HETATM | 53 | H | 0 | -7.313 | 0.325  | 0.510  | H |
| HETATM | 54 | C | 0 | 1.691  | -3.690 | -1.719 | C |
| HETATM | 55 | H | 0 | 2.290  | -4.159 | -2.517 | H |
| HETATM | 56 | H | 0 | 0.993  | -4.455 | -1.331 | H |
| HETATM | 57 | H | 0 | 1.059  | -2.908 | -2.185 | H |
| HETATM | 58 | C | 0 | 2.144  | -1.118 | 2.590  | C |
| HETATM | 59 | H | 0 | 1.219  | -1.601 | 2.951  | H |
| HETATM | 60 | H | 0 | 2.844  | -1.023 | 3.437  | H |
| HETATM | 61 | H | 0 | 1.839  | -0.097 | 2.290  | H |
| HETATM | 62 | C | 0 | 6.249  | -2.341 | -0.042 | C |
| HETATM | 63 | H | 0 | 6.793  | -2.290 | 0.916  | H |
| HETATM | 64 | H | 0 | 6.644  | -3.196 | -0.616 | H |
| HETATM | 65 | H | 0 | 6.518  | -1.427 | -0.607 | H |
| HETATM | 66 | C | 0 | 0.579  | 5.318  | 0.344  | C |
| HETATM | 67 | H | 0 | 0.085  | 5.996  | 1.062  | H |
| HETATM | 68 | H | 0 | 1.566  | 5.752  | 0.111  | H |
| HETATM | 69 | H | 0 | -0.025 | 5.324  | -0.578 | H |
| HETATM | 70 | C | 0 | 1.468  | 3.824  | 2.214  | C |
| HETATM | 71 | H | 0 | 2.497  | 4.209  | 2.116  | H |
| HETATM | 72 | H | 0 | 0.972  | 4.410  | 3.008  | H |
| HETATM | 73 | H | 0 | 1.509  | 2.776  | 2.554  | H |
| HETATM | 74 | H | 0 | -1.898 | -4.279 | 0.359  | H |
| HETATM | 75 | H | 0 | 0.422  | -4.674 | 0.850  | H |
| HETATM | 76 | C | 0 | -1.458 | 2.840  | -1.885 | C |
| HETATM | 77 | H | 0 | -0.748 | 3.663  | -1.976 | H |
| HETATM | 78 | H | 0 | -1.421 | 2.001  | -2.585 | H |
| HETATM | 79 | C | 0 | -2.361 | 2.858  | -0.913 | C |



|        |    |   |   |        |       |        |   |
|--------|----|---|---|--------|-------|--------|---|
| HETATM | 80 | F | 0 | -3.257 | 1.921 | -0.692 | F |
| HETATM | 81 | F | 0 | -2.503 | 3.827 | -0.028 | F |
| END    |    |   |   |        |       |        |   |

## s2c.pdb

| TITLE  | s2c.pdb |    |   |        |        |        |    |
|--------|---------|----|---|--------|--------|--------|----|
| HETATM | 1       | Ru | 0 | -0.445 | 0.163  | -0.477 | Ru |
| HETATM | 2       | C  | 0 | -0.248 | -3.614 | 1.568  | C  |
| HETATM | 3       | C  | 0 | -1.743 | -3.336 | 1.483  | C  |
| HETATM | 4       | H  | 0 | 0.139  | -3.565 | 2.605  | H  |
| HETATM | 5       | H  | 0 | -2.244 | -3.339 | 2.468  | H  |
| HETATM | 6       | C  | 0 | -0.571 | -1.579 | 0.428  | C  |
| HETATM | 7       | N  | 0 | -1.785 | -2.006 | 0.888  | N  |
| HETATM | 8       | N  | 0 | 0.338  | -2.534 | 0.769  | N  |
| HETATM | 9       | Cl | 0 | -0.768 | 1.276  | 1.631  | Cl |
| HETATM | 10      | Cl | 0 | -0.849 | -0.857 | -2.656 | Cl |
| HETATM | 11      | C  | 0 | 1.382  | 0.145  | -0.807 | C  |
| HETATM | 12      | H  | 0 | 1.730  | -0.823 | -1.212 | H  |
| HETATM | 13      | C  | 0 | 2.486  | 1.086  | -0.792 | C  |
| HETATM | 14      | C  | 0 | 2.467  | 2.426  | -0.289 | C  |
| HETATM | 15      | C  | 0 | 3.725  | 0.587  | -1.271 | C  |
| HETATM | 16      | C  | 0 | 3.658  | 3.171  | -0.266 | C  |
| HETATM | 17      | C  | 0 | 4.892  | 1.335  | -1.250 | C  |
| HETATM | 18      | H  | 0 | 3.742  | -0.441 | -1.657 | H  |
| HETATM | 19      | C  | 0 | 4.852  | 2.634  | -0.737 | C  |
| HETATM | 20      | H  | 0 | 3.646  | 4.199  | 0.101  | H  |
| HETATM | 21      | H  | 0 | 5.828  | 0.916  | -1.634 | H  |
| HETATM | 22      | H  | 0 | 5.760  | 3.248  | -0.714 | H  |
| HETATM | 23      | O  | 0 | 1.284  | 2.917  | 0.089  | O  |
| HETATM | 24      | C  | 0 | 1.111  | 3.958  | 1.081  | C  |
| HETATM | 25      | H  | 0 | 0.063  | 3.784  | 1.370  | H  |
| HETATM | 26      | C  | 0 | -3.022 | -1.357 | 0.589  | C  |
| HETATM | 27      | C  | 0 | -3.664 | -1.615 | -0.641 | C  |
| HETATM | 28      | C  | 0 | -3.619 | -0.514 | 1.551  | C  |
| HETATM | 29      | C  | 0 | -4.811 | -0.881 | -0.961 | C  |
| HETATM | 30      | C  | 0 | -4.767 | 0.196  | 1.188  | C  |
| HETATM | 31      | C  | 0 | -5.351 | 0.057  | -0.075 | C  |
| HETATM | 32      | H  | 0 | -5.295 | -1.053 | -1.931 | H  |
| HETATM | 33      | H  | 0 | -5.216 | 0.881  | 1.920  | H  |
| HETATM | 34      | C  | 0 | 1.747  | -2.526 | 0.563  | C  |
| HETATM | 35      | C  | 0 | 2.269  | -3.250 | -0.525 | C  |
| HETATM | 36      | C  | 0 | 2.590  | -1.846 | 1.461  | C  |
| HETATM | 37      | C  | 0 | 3.656  | -3.292 | -0.695 | C  |
| HETATM | 38      | C  | 0 | 3.972  | -1.910 | 1.252  | C  |
| HETATM | 39      | C  | 0 | 4.521  | -2.628 | 0.183  | C  |
| HETATM | 40      | H  | 0 | 4.070  | -3.850 | -1.545 | H  |
| HETATM | 41      | H  | 0 | 4.637  | -1.374 | 1.941  | H  |
| HETATM | 42      | C  | 0 | -3.221 | -2.725 | -1.546 | C  |
| HETATM | 43      | H  | 0 | -3.344 | -2.456 | -2.607 | H  |
| HETATM | 44      | H  | 0 | -2.163 | -2.999 | -1.411 | H  |
| HETATM | 45      | H  | 0 | -3.837 | -3.628 | -1.360 | H  |
| HETATM | 46      | C  | 0 | -3.118 | -0.441 | 2.960  | C  |
| HETATM | 47      | H  | 0 | -3.188 | 0.584  | 3.361  | H  |
| HETATM | 48      | H  | 0 | -3.734 | -1.090 | 3.614  | H  |
| HETATM | 49      | H  | 0 | -2.068 | -0.754 | 3.055  | H  |
| HETATM | 50      | C  | 0 | -6.518 | 0.906  | -0.477 | C  |
| HETATM | 51      | H  | 0 | -6.173 | 1.844  | -0.953 | H  |
| HETATM | 52      | H  | 0 | -7.168 | 0.400  | -1.210 | H  |
| HETATM | 53      | H  | 0 | -7.137 | 1.200  | 0.388  | H  |
| HETATM | 54      | C  | 0 | 1.345  | -3.883 | -1.519 | C  |

|        |    |   |   |        |        |        |   |
|--------|----|---|---|--------|--------|--------|---|
| HETATM | 55 | H | 0 | 1.904  | -4.429 | -2.297 | H |
| HETATM | 56 | H | 0 | 0.639  | -4.597 | -1.053 | H |
| HETATM | 57 | H | 0 | 0.720  | -3.117 | -2.022 | H |
| HETATM | 58 | C | 0 | 2.015  | -1.028 | 2.574  | C |
| HETATM | 59 | H | 0 | 1.282  | -1.592 | 3.180  | H |
| HETATM | 60 | H | 0 | 2.803  | -0.662 | 3.253  | H |
| HETATM | 61 | H | 0 | 1.462  | -0.151 | 2.184  | H |
| HETATM | 62 | C | 0 | 6.002  | -2.640 | -0.046 | C |
| HETATM | 63 | H | 0 | 6.568  | -2.587 | 0.900  | H |
| HETATM | 64 | H | 0 | 6.330  | -3.541 | -0.591 | H |
| HETATM | 65 | H | 0 | 6.319  | -1.769 | -0.651 | H |
| HETATM | 66 | C | 0 | 1.205  | 5.342  | 0.468  | C |
| HETATM | 67 | H | 0 | 0.822  | 6.089  | 1.185  | H |
| HETATM | 68 | H | 0 | 2.231  | 5.644  | 0.196  | H |
| HETATM | 69 | H | 0 | 0.577  | 5.403  | -0.438 | H |
| HETATM | 70 | C | 0 | 1.950  | 3.732  | 2.321  | C |
| HETATM | 71 | H | 0 | 3.027  | 3.928  | 2.184  | H |
| HETATM | 72 | H | 0 | 1.593  | 4.401  | 3.123  | H |
| HETATM | 73 | H | 0 | 1.823  | 2.694  | 2.675  | H |
| HETATM | 74 | H | 0 | -2.278 | -4.060 | 0.835  | H |
| HETATM | 75 | H | 0 | 0.040  | -4.599 | 1.159  | H |
| HETATM | 76 | C | 0 | -0.778 | 2.357  | -2.080 | C |
| HETATM | 77 | H | 0 | 0.155  | 2.919  | -2.038 | H |
| HETATM | 78 | H | 0 | -0.946 | 1.610  | -2.860 | H |
| HETATM | 79 | C | 0 | -1.767 | 2.674  | -1.239 | C |
| HETATM | 80 | F | 0 | -2.950 | 2.102  | -1.224 | F |
| HETATM | 81 | F | 0 | -1.724 | 3.634  | -0.349 | F |

END

## s2d.pdb

| TITLE  | s2d.pdb |    |   |        |        |        |    |
|--------|---------|----|---|--------|--------|--------|----|
| HETATM | 1       | Ru | 0 | -0.302 | 0.021  | -0.772 | Ru |
| HETATM | 2       | C  | 0 | -0.348 | -3.423 | 1.921  | C  |
| HETATM | 3       | C  | 0 | -1.834 | -3.078 | 1.874  | C  |
| HETATM | 4       | H  | 0 | 0.092  | -3.315 | 2.931  | H  |
| HETATM | 5       | H  | 0 | -2.268 | -2.884 | 2.871  | H  |
| HETATM | 6       | C  | 0 | -0.650 | -1.545 | 0.555  | C  |
| HETATM | 7       | N  | 0 | -1.858 | -1.860 | 1.061  | N  |
| HETATM | 8       | N  | 0 | 0.249  | -2.440 | 1.009  | N  |
| HETATM | 9       | Cl | 0 | -0.722 | 1.354  | 1.251  | Cl |
| HETATM | 10      | Cl | 0 | -0.058 | -1.631 | -2.548 | Cl |
| HETATM | 11      | C  | 0 | 1.507  | 0.520  | -1.052 | C  |
| HETATM | 12      | H  | 0 | 1.984  | -0.265 | -1.677 | H  |
| HETATM | 13      | C  | 0 | 2.490  | 1.467  | -0.571 | C  |
| HETATM | 14      | C  | 0 | 2.254  | 2.778  | -0.047 | C  |
| HETATM | 15      | C  | 0 | 3.823  | 0.990  | -0.589 | C  |
| HETATM | 16      | C  | 0 | 3.329  | 3.489  | 0.515  | C  |
| HETATM | 17      | C  | 0 | 4.871  | 1.693  | -0.016 | C  |
| HETATM | 18      | H  | 0 | 4.006  | 0.011  | -1.049 | H  |
| HETATM | 19      | C  | 0 | 4.610  | 2.945  | 0.548  | C  |
| HETATM | 20      | H  | 0 | 3.174  | 4.498  | 0.900  | H  |
| HETATM | 21      | H  | 0 | 5.886  | 1.280  | -0.020 | H  |
| HETATM | 22      | H  | 0 | 5.424  | 3.529  | 0.993  | H  |
| HETATM | 23      | O  | 0 | 1.035  | 3.278  | -0.221 | O  |
| HETATM | 24      | C  | 0 | 0.476  | 4.393  | 0.520  | C  |
| HETATM | 25      | H  | 0 | -0.599 | 4.190  | 0.397  | H  |
| HETATM | 26      | C  | 0 | -3.072 | -1.161 | 0.782  | C  |
| HETATM | 27      | C  | 0 | -3.732 | -1.364 | -0.444 | C  |
| HETATM | 28      | C  | 0 | -3.617 | -0.311 | 1.768  | C  |
| HETATM | 29      | C  | 0 | -4.896 | -0.628 | -0.705 | C  |

|        |    |   |   |        |        |        |   |
|--------|----|---|---|--------|--------|--------|---|
| HETATM | 30 | C | 0 | -4.779 | 0.399  | 1.464  | C |
| HETATM | 31 | C | 0 | -5.420 | 0.270  | 0.225  | C |
| HETATM | 32 | H | 0 | -5.407 | -0.774 | -1.666 | H |
| HETATM | 33 | H | 0 | -5.193 | 1.082  | 2.218  | H |
| HETATM | 34 | C | 0 | 1.640  | -2.491 | 0.695  | C |
| HETATM | 35 | C | 0 | 2.100  | -3.434 | -0.242 | C |
| HETATM | 36 | C | 0 | 2.540  | -1.655 | 1.390  | C |
| HETATM | 37 | C | 0 | 3.475  | -3.493 | -0.509 | C |
| HETATM | 38 | C | 0 | 3.904  | -1.771 | 1.114  | C |
| HETATM | 39 | C | 0 | 4.388  | -2.671 | 0.155  | C |
| HETATM | 40 | H | 0 | 3.837  | -4.210 | -1.257 | H |
| HETATM | 41 | H | 0 | 4.608  | -1.125 | 1.655  | H |
| HETATM | 42 | C | 0 | -3.255 | -2.357 | -1.460 | C |
| HETATM | 43 | H | 0 | -2.705 | -1.878 | -2.289 | H |
| HETATM | 44 | H | 0 | -2.561 | -3.104 | -1.040 | H |
| HETATM | 45 | H | 0 | -4.111 | -2.894 | -1.906 | H |
| HETATM | 46 | C | 0 | -3.001 | -0.190 | 3.128  | C |
| HETATM | 47 | H | 0 | -3.154 | 0.821  | 3.542  | H |
| HETATM | 48 | H | 0 | -3.460 | -0.904 | 3.841  | H |
| HETATM | 49 | H | 0 | -1.914 | -0.367 | 3.111  | H |
| HETATM | 50 | C | 0 | -6.639 | 1.084  | -0.088 | C |
| HETATM | 51 | H | 0 | -6.372 | 2.132  | -0.320 | H |
| HETATM | 52 | H | 0 | -7.185 | 0.689  | -0.961 | H |
| HETATM | 53 | H | 0 | -7.340 | 1.121  | 0.764  | H |
| HETATM | 54 | C | 0 | 1.169  | -4.394 | -0.916 | C |
| HETATM | 55 | H | 0 | 1.494  | -4.603 | -1.949 | H |
| HETATM | 56 | H | 0 | 1.143  | -5.366 | -0.384 | H |
| HETATM | 57 | H | 0 | 0.141  | -4.004 | -0.976 | H |
| HETATM | 58 | C | 0 | 2.050  | -0.670 | 2.404  | C |
| HETATM | 59 | H | 0 | 1.469  | -1.157 | 3.212  | H |
| HETATM | 60 | H | 0 | 2.891  | -0.135 | 2.877  | H |
| HETATM | 61 | H | 0 | 1.369  | 0.084  | 1.963  | H |
| HETATM | 62 | C | 0 | 5.851  | -2.716 | -0.166 | C |
| HETATM | 63 | H | 0 | 6.475  | -2.688 | 0.745  | H |
| HETATM | 64 | H | 0 | 6.124  | -3.620 | -0.736 | H |
| HETATM | 65 | H | 0 | 6.156  | -1.845 | -0.779 | H |
| HETATM | 66 | C | 0 | 0.807  | 5.704  | -0.164 | C |
| HETATM | 67 | H | 0 | 0.231  | 6.522  | 0.304  | H |
| HETATM | 68 | H | 0 | 1.877  | 5.969  | -0.089 | H |
| HETATM | 69 | H | 0 | 0.536  | 5.673  | -1.233 | H |
| HETATM | 70 | C | 0 | 0.775  | 4.368  | 2.009  | C |
| HETATM | 71 | H | 0 | 1.716  | 4.870  | 2.290  | H |
| HETATM | 72 | H | 0 | -0.040 | 4.892  | 2.539  | H |
| HETATM | 73 | H | 0 | 0.790  | 3.331  | 2.381  | H |
| HETATM | 74 | H | 0 | -2.447 | -3.864 | 1.393  | H |
| HETATM | 75 | H | 0 | -0.128 | -4.449 | 1.574  | H |
| HETATM | 76 | C | 0 | 0.047  | 1.485  | -2.461 | C |
| HETATM | 77 | H | 0 | 0.673  | 2.373  | -2.347 | H |
| HETATM | 78 | H | 0 | 0.169  | 0.873  | -3.363 | H |
| HETATM | 79 | C | 0 | -1.237 | 1.542  | -1.858 | C |
| HETATM | 80 | F | 0 | -2.283 | 0.947  | -2.467 | F |
| HETATM | 81 | F | 0 | -1.674 | 2.666  | -1.293 | F |

END

## s2I.pdb

|        |         |    |   |       |        |        |    |
|--------|---------|----|---|-------|--------|--------|----|
| TITLE  | S2I.pdb |    |   |       |        |        |    |
| HETATM | 1       | Ru | 0 | 0.490 | -0.455 | -0.334 | Ru |
| HETATM | 2       | C  | 0 | 1.158 | 3.626  | 0.863  | C  |
| HETATM | 3       | C  | 0 | 2.573 | 3.069  | 1.021  | C  |
| HETATM | 4       | H  | 0 | 0.756 | 4.063  | 1.794  | H  |

|        |    |    |   |        |        |        |    |
|--------|----|----|---|--------|--------|--------|----|
| HETATM | 5  | H  | 0 | 2.932  | 3.085  | 2.068  | H  |
| HETATM | 6  | C  | 0 | 1.158  | 1.365  | 0.290  | C  |
| HETATM | 7  | N  | 0 | 2.436  | 1.682  | 0.560  | N  |
| HETATM | 8  | N  | 0 | 0.379  | 2.443  | 0.485  | N  |
| HETATM | 9  | Cl | 0 | -0.577 | -0.846 | 1.794  | Cl |
| HETATM | 10 | Cl | 0 | 1.602  | 0.193  | -2.431 | Cl |
| HETATM | 11 | C  | 0 | -0.863 | -1.326 | -1.637 | C  |
| HETATM | 12 | H  | 0 | -0.479 | -1.090 | -2.640 | H  |
| HETATM | 13 | C  | 0 | -2.312 | -1.101 | -1.587 | C  |
| HETATM | 14 | C  | 0 | -3.240 | -1.639 | -0.648 | C  |
| HETATM | 15 | C  | 0 | -2.821 | -0.288 | -2.624 | C  |
| HETATM | 16 | C  | 0 | -4.605 | -1.336 | -0.785 | C  |
| HETATM | 17 | C  | 0 | -4.170 | 0.016  | -2.741 | C  |
| HETATM | 18 | H  | 0 | -2.104 | 0.114  | -3.351 | H  |
| HETATM | 19 | C  | 0 | -5.064 | -0.515 | -1.810 | C  |
| HETATM | 20 | H  | 0 | -5.329 | -1.779 | -0.098 | H  |
| HETATM | 21 | H  | 0 | -4.524 | 0.656  | -3.557 | H  |
| HETATM | 22 | H  | 0 | -6.138 | -0.306 | -1.889 | H  |
| HETATM | 23 | O  | 0 | -2.758 | -2.480 | 0.276  | O  |
| HETATM | 24 | C  | 0 | -3.384 | -2.736 | 1.554  | C  |
| HETATM | 25 | H  | 0 | -2.511 | -3.069 | 2.142  | H  |
| HETATM | 26 | C  | 0 | 3.542  | 0.782  | 0.453  | C  |
| HETATM | 27 | C  | 0 | 4.425  | 0.888  | -0.636 | C  |
| HETATM | 28 | C  | 0 | 3.736  | -0.187 | 1.457  | C  |
| HETATM | 29 | C  | 0 | 5.457  | -0.049 | -0.747 | C  |
| HETATM | 30 | C  | 0 | 4.778  | -1.106 | 1.304  | C  |
| HETATM | 31 | C  | 0 | 5.635  | -1.064 | 0.198  | C  |
| HETATM | 32 | H  | 0 | 6.134  | 0.012  | -1.610 | H  |
| HETATM | 33 | H  | 0 | 4.925  | -1.872 | 2.076  | H  |
| HETATM | 34 | C  | 0 | -1.051 | 2.433  | 0.452  | C  |
| HETATM | 35 | C  | 0 | -1.719 | 2.575  | -0.778 | C  |
| HETATM | 36 | C  | 0 | -1.764 | 2.308  | 1.661  | C  |
| HETATM | 37 | C  | 0 | -3.119 | 2.552  | -0.780 | C  |
| HETATM | 38 | C  | 0 | -3.159 | 2.277  | 1.609  | C  |
| HETATM | 39 | C  | 0 | -3.853 | 2.387  | 0.397  | C  |
| HETATM | 40 | H  | 0 | -3.647 | 2.664  | -1.735 | H  |
| HETATM | 41 | H  | 0 | -3.721 | 2.150  | 2.544  | H  |
| HETATM | 42 | C  | 0 | 4.302  | 1.986  | -1.649 | C  |
| HETATM | 43 | H  | 0 | 4.602  | 1.635  | -2.649 | H  |
| HETATM | 44 | H  | 0 | 3.269  | 2.357  | -1.740 | H  |
| HETATM | 45 | H  | 0 | 4.960  | 2.842  | -1.395 | H  |
| HETATM | 46 | C  | 0 | 2.863  | -0.227 | 2.674  | C  |
| HETATM | 47 | H  | 0 | 2.754  | 0.772  | 3.135  | H  |
| HETATM | 48 | H  | 0 | 1.837  | -0.579 | 2.456  | H  |
| HETATM | 49 | H  | 0 | 3.284  | -0.902 | 3.438  | H  |
| HETATM | 50 | C  | 0 | 6.707  | -2.095 | 0.021  | C  |
| HETATM | 51 | H  | 0 | 6.336  | -2.955 | -0.570 | H  |
| HETATM | 52 | H  | 0 | 7.582  | -1.695 | -0.520 | H  |
| HETATM | 53 | H  | 0 | 7.055  | -2.500 | 0.986  | H  |
| HETATM | 54 | C  | 0 | -0.957 | 2.770  | -2.052 | C  |
| HETATM | 55 | H  | 0 | -1.643 | 2.893  | -2.907 | H  |
| HETATM | 56 | H  | 0 | -0.313 | 3.669  | -2.012 | H  |
| HETATM | 57 | H  | 0 | -0.277 | 1.926  | -2.281 | H  |
| HETATM | 58 | C  | 0 | -1.062 | 2.237  | 2.983  | C  |
| HETATM | 59 | H  | 0 | -0.939 | 3.244  | 3.432  | H  |
| HETATM | 60 | H  | 0 | -1.638 | 1.632  | 3.702  | H  |
| HETATM | 61 | H  | 0 | -0.065 | 1.773  | 2.903  | H  |
| HETATM | 62 | C  | 0 | -5.351 | 2.344  | 0.375  | C  |
| HETATM | 63 | H  | 0 | -5.735 | 1.414  | 0.832  | H  |
| HETATM | 64 | H  | 0 | -5.794 | 3.179  | 0.950  | H  |
| HETATM | 65 | H  | 0 | -5.748 | 2.398  | -0.652 | H  |
| HETATM | 66 | C  | 0 | -4.365 | -3.889 | 1.462  | C  |

|        |    |   |   |        |        |        |   |
|--------|----|---|---|--------|--------|--------|---|
| HETATM | 67 | H | 0 | -4.674 | -4.197 | 2.477  | H |
| HETATM | 68 | H | 0 | -5.281 | -3.634 | 0.902  | H |
| HETATM | 69 | H | 0 | -3.901 | -4.763 | 0.974  | H |
| HETATM | 70 | C | 0 | -3.933 | -1.495 | 2.234  | C |
| HETATM | 71 | H | 0 | -4.938 | -1.200 | 1.888  | H |
| HETATM | 72 | H | 0 | -4.007 | -1.689 | 3.319  | H |
| HETATM | 73 | H | 0 | -3.239 | -0.648 | 2.095  | H |
| HETATM | 74 | H | 0 | 3.320  | 3.601  | 0.407  | H |
| HETATM | 75 | H | 0 | 1.080  | 4.397  | 0.073  | H |
| HETATM | 76 | C | 0 | -0.099 | -2.508 | -1.035 | C |
| HETATM | 77 | H | 0 | -0.688 | -3.082 | -0.308 | H |
| HETATM | 78 | H | 0 | 0.238  | -3.118 | -1.890 | H |
| HETATM | 79 | C | 0 | 1.339  | -2.179 | -0.361 | C |
| HETATM | 80 | F | 0 | 2.364  | -2.496 | -1.163 | F |
| HETATM | 81 | F | 0 | 1.520  | -2.900 | 0.758  | F |

END

## s2e.pdb

| TITLE  | s2e.pdb |    |   |        |        |        |    |
|--------|---------|----|---|--------|--------|--------|----|
| HETATM | 1       | Ru | 0 | -0.474 | -0.554 | 0.291  | Ru |
| HETATM | 2       | Cl | 0 | -1.523 | -0.005 | 2.450  | Cl |
| HETATM | 3       | Cl | 0 | 0.604  | -0.763 | -1.868 | Cl |
| HETATM | 4       | C  | 0 | -1.119 | 1.346  | -0.215 | C  |
| HETATM | 5       | N  | 0 | -2.397 | 1.701  | -0.438 | N  |
| HETATM | 6       | C  | 0 | -2.526 | 3.110  | -0.829 | C  |
| HETATM | 7       | C  | 0 | -1.103 | 3.640  | -0.669 | C  |
| HETATM | 8       | N  | 0 | -0.334 | 2.428  | -0.372 | N  |
| HETATM | 9       | C  | 0 | -3.526 | 0.828  | -0.366 | C  |
| HETATM | 10      | C  | 0 | -4.394 | 0.904  | 0.737  | C  |
| HETATM | 11      | C  | 0 | -5.471 | 0.013  | 0.797  | C  |
| HETATM | 12      | C  | 0 | -5.705 | -0.927 | -0.211 | C  |
| HETATM | 13      | C  | 0 | -4.857 | -0.941 | -1.324 | C  |
| HETATM | 14      | C  | 0 | -3.771 | -0.066 | -1.427 | C  |
| HETATM | 15      | C  | 0 | -4.213 | 1.928  | 1.816  | C  |
| HETATM | 16      | C  | 0 | -6.831 | -1.909 | -0.094 | C  |
| HETATM | 17      | C  | 0 | -2.906 | -0.067 | -2.650 | C  |
| HETATM | 18      | C  | 0 | 1.095  | 2.416  | -0.380 | C  |
| HETATM | 19      | C  | 0 | 1.771  | 2.383  | -1.616 | C  |
| HETATM | 20      | C  | 0 | 3.168  | 2.367  | -1.609 | C  |
| HETATM | 21      | C  | 0 | 3.897  | 2.397  | -0.414 | C  |
| HETATM | 22      | C  | 0 | 3.200  | 2.463  | 0.794  | C  |
| HETATM | 23      | C  | 0 | 1.800  | 2.473  | 0.835  | C  |
| HETATM | 24      | C  | 0 | 1.030  | 2.387  | -2.919 | C  |
| HETATM | 25      | C  | 0 | 5.396  | 2.363  | -0.439 | C  |
| HETATM | 26      | C  | 0 | 1.075  | 2.572  | 2.142  | C  |
| HETATM | 27      | H  | 0 | -3.256 | 3.621  | -0.178 | H  |
| HETATM | 28      | H  | 0 | -2.902 | 3.181  | -1.868 | H  |
| HETATM | 29      | H  | 0 | -0.999 | 4.366  | 0.160  | H  |
| HETATM | 30      | H  | 0 | -0.713 | 4.124  | -1.582 | H  |
| HETATM | 31      | H  | 0 | -6.139 | 0.050  | 1.668  | H  |
| HETATM | 32      | H  | 0 | -5.046 | -1.649 | -2.142 | H  |
| HETATM | 33      | H  | 0 | -4.850 | 2.817  | 1.633  | H  |
| HETATM | 34      | H  | 0 | -3.168 | 2.263  | 1.906  | H  |
| HETATM | 35      | H  | 0 | -4.504 | 1.522  | 2.799  | H  |
| HETATM | 36      | H  | 0 | -7.194 | -2.241 | -1.082 | H  |
| HETATM | 37      | H  | 0 | -6.512 | -2.819 | 0.450  | H  |
| HETATM | 38      | H  | 0 | -7.687 | -1.493 | 0.464  | H  |
| HETATM | 39      | H  | 0 | -3.311 | -0.746 | -3.419 | H  |
| HETATM | 40      | H  | 0 | -2.833 | 0.940  | -3.102 | H  |
| HETATM | 41      | H  | 0 | -1.868 | -0.389 | -2.445 | H  |

|        |    |   |   |        |        |        |   |
|--------|----|---|---|--------|--------|--------|---|
| HETATM | 42 | H | 0 | 3.702  | 2.314  | -2.568 | H |
| HETATM | 43 | H | 0 | 3.756  | 2.509  | 1.738  | H |
| HETATM | 44 | H | 0 | 0.915  | 3.415  | -3.318 | H |
| HETATM | 45 | H | 0 | 1.574  | 1.806  | -3.682 | H |
| HETATM | 46 | H | 0 | 0.027  | 1.939  | -2.831 | H |
| HETATM | 47 | H | 0 | 5.816  | 3.170  | -1.066 | H |
| HETATM | 48 | H | 0 | 5.772  | 1.413  | -0.863 | H |
| HETATM | 49 | H | 0 | 5.826  | 2.465  | 0.572  | H |
| HETATM | 50 | H | 0 | 0.429  | 3.470  | 2.184  | H |
| HETATM | 51 | H | 0 | 1.784  | 2.633  | 2.985  | H |
| HETATM | 52 | H | 0 | 0.403  | 1.712  | 2.327  | H |
| HETATM | 53 | C | 0 | 0.791  | -1.711 | 1.551  | C |
| HETATM | 54 | C | 0 | 2.195  | -1.296 | 1.597  | C |
| HETATM | 55 | C | 0 | 3.218  | -1.648 | 0.672  | C |
| HETATM | 56 | C | 0 | 4.532  | -1.211 | 0.911  | C |
| HETATM | 57 | C | 0 | 4.841  | -0.437 | 2.026  | C |
| HETATM | 58 | C | 0 | 3.847  | -0.082 | 2.940  | C |
| HETATM | 59 | C | 0 | 2.548  | -0.517 | 2.720  | C |
| HETATM | 60 | O | 0 | 2.860  | -2.458 | -0.333 | O |
| HETATM | 61 | C | 0 | 3.595  | -2.623 | -1.564 | C |
| HETATM | 62 | C | 0 | 4.068  | -1.321 | -2.184 | C |
| HETATM | 63 | C | 0 | 4.674  | -3.681 | -1.424 | C |
| HETATM | 64 | H | 0 | 0.328  | -1.643 | 2.545  | H |
| HETATM | 65 | H | 0 | 5.336  | -1.510 | 0.234  | H |
| HETATM | 66 | H | 0 | 5.879  | -0.120 | 2.185  | H |
| HETATM | 67 | H | 0 | 4.088  | 0.525  | 3.820  | H |
| HETATM | 68 | H | 0 | 1.749  | -0.255 | 3.426  | H |
| HETATM | 69 | H | 0 | 2.802  | -3.024 | -2.219 | H |
| HETATM | 70 | H | 0 | 3.287  | -0.548 | -2.090 | H |
| HETATM | 71 | H | 0 | 4.247  | -1.487 | -3.261 | H |
| HETATM | 72 | H | 0 | 5.011  | -0.938 | -1.757 | H |
| HETATM | 73 | H | 0 | 4.264  | -4.606 | -0.983 | H |
| HETATM | 74 | H | 0 | 5.079  | -3.935 | -2.419 | H |
| HETATM | 75 | H | 0 | 5.521  | -3.353 | -0.797 | H |
| HETATM | 76 | C | 0 | 0.111  | -2.676 | 0.678  | C |
| HETATM | 77 | C | 0 | -1.513 | -2.088 | 0.042  | C |
| HETATM | 78 | F | 0 | -2.484 | -2.516 | 0.846  | F |
| HETATM | 79 | F | 0 | -1.699 | -2.722 | -1.115 | F |
| HETATM | 80 | H | 0 | -0.407 | -3.449 | 1.267  | H |
| HETATM | 81 | H | 0 | 0.657  | -3.061 | -0.191 | H |

END

## s2f.pdb

|        |         |    |   |        |        |        |    |
|--------|---------|----|---|--------|--------|--------|----|
| TITLE  | s2f.pdb |    |   |        |        |        |    |
| HETATM | 1       | Ru | 0 | -0.418 | -0.699 | 0.418  | Ru |
| HETATM | 2       | C  | 0 | -1.010 | 3.444  | -0.601 | C  |
| HETATM | 3       | C  | 0 | -2.461 | 2.991  | -0.680 | C  |
| HETATM | 4       | H  | 0 | -0.637 | 3.879  | -1.547 | H  |
| HETATM | 5       | H  | 0 | -2.892 | 3.086  | -1.696 | H  |
| HETATM | 6       | C  | 0 | -1.119 | 1.140  | -0.133 | C  |
| HETATM | 7       | N  | 0 | -2.389 | 1.576  | -0.302 | N  |
| HETATM | 8       | N  | 0 | -0.293 | 2.201  | -0.308 | N  |
| HETATM | 9       | Cl | 0 | 0.341  | -1.114 | -1.858 | Cl |
| HETATM | 10      | Cl | 0 | -0.940 | -0.040 | 2.728  | Cl |
| HETATM | 11      | C  | 0 | 1.074  | -2.149 | 1.641  | C  |
| HETATM | 12      | C  | 0 | 2.341  | -1.414 | 1.591  | C  |
| HETATM | 13      | C  | 0 | 3.334  | -1.571 | 0.578  | C  |
| HETATM | 14      | C  | 0 | 2.634  | -0.591 | 2.698  | C  |
| HETATM | 15      | C  | 0 | 4.571  | -0.922 | 0.734  | C  |
| HETATM | 16      | C  | 0 | 3.856  | 0.055  | 2.833  | C  |

|        |    |   |   |        |        |        |   |
|--------|----|---|---|--------|--------|--------|---|
| HETATM | 17 | H | 0 | 1.857  | -0.474 | 3.464  | H |
| HETATM | 18 | C | 0 | 4.825  | -0.123 | 1.844  | C |
| HETATM | 19 | H | 0 | 5.359  | -1.066 | -0.008 | H |
| HETATM | 20 | H | 0 | 4.055  | 0.689  | 3.704  | H |
| HETATM | 21 | H | 0 | 5.803  | 0.367  | 1.934  | H |
| HETATM | 22 | O | 0 | 3.033  | -2.407 | -0.422 | O |
| HETATM | 23 | C | 0 | 3.729  | -2.486 | -1.682 | C |
| HETATM | 24 | H | 0 | 2.994  | -3.053 | -2.280 | H |
| HETATM | 25 | C | 0 | -3.586 | 0.798  | -0.332 | C |
| HETATM | 26 | C | 0 | -4.459 | 0.823  | 0.772  | C |
| HETATM | 27 | C | 0 | -3.918 | 0.101  | -1.510 | C |
| HETATM | 28 | C | 0 | -5.654 | 0.102  | 0.688  | C |
| HETATM | 29 | C | 0 | -5.119 | -0.616 | -1.545 | C |
| HETATM | 30 | C | 0 | -5.994 | -0.631 | -0.454 | C |
| HETATM | 31 | H | 0 | -6.335 | 0.108  | 1.549  | H |
| HETATM | 32 | H | 0 | -5.377 | -1.171 | -2.457 | H |
| HETATM | 33 | C | 0 | 1.135  | 2.190  | -0.397 | C |
| HETATM | 34 | C | 0 | 1.909  | 2.469  | 0.748  | C |
| HETATM | 35 | C | 0 | 1.734  | 2.079  | -1.668 | C |
| HETATM | 36 | C | 0 | 3.297  | 2.565  | 0.605  | C |
| HETATM | 37 | C | 0 | 3.127  | 2.159  | -1.757 | C |
| HETATM | 38 | C | 0 | 3.924  | 2.388  | -0.632 | C |
| HETATM | 39 | H | 0 | 3.903  | 2.785  | 1.493  | H |
| HETATM | 40 | H | 0 | 3.600  | 2.049  | -2.742 | H |
| HETATM | 41 | C | 0 | -4.098 | 1.562  | 2.021  | C |
| HETATM | 42 | H | 0 | -4.891 | 1.469  | 2.781  | H |
| HETATM | 43 | H | 0 | -3.158 | 1.168  | 2.454  | H |
| HETATM | 44 | H | 0 | -3.937 | 2.642  | 1.844  | H |
| HETATM | 45 | C | 0 | -2.999 | 0.117  | -2.691 | C |
| HETATM | 46 | H | 0 | -2.768 | 1.148  | -3.021 | H |
| HETATM | 47 | H | 0 | -2.024 | -0.360 | -2.469 | H |
| HETATM | 48 | H | 0 | -3.443 | -0.413 | -3.549 | H |
| HETATM | 49 | C | 0 | -7.259 | -1.433 | -0.503 | C |
| HETATM | 50 | H | 0 | -7.080 | -2.484 | -0.208 | H |
| HETATM | 51 | H | 0 | -8.026 | -1.037 | 0.184  | H |
| HETATM | 52 | H | 0 | -7.691 | -1.461 | -1.518 | H |
| HETATM | 53 | C | 0 | 1.270  | 2.699  | 2.082  | C |
| HETATM | 54 | H | 0 | 2.026  | 2.958  | 2.842  | H |
| HETATM | 55 | H | 0 | 0.533  | 3.523  | 2.051  | H |
| HETATM | 56 | H | 0 | 0.717  | 1.811  | 2.441  | H |
| HETATM | 57 | C | 0 | 0.922  | 1.962  | -2.923 | C |
| HETATM | 58 | H | 0 | 0.821  | 2.948  | -3.419 | H |
| HETATM | 59 | H | 0 | 1.407  | 1.287  | -3.647 | H |
| HETATM | 60 | H | 0 | -0.088 | 1.560  | -2.744 | H |
| HETATM | 61 | C | 0 | 5.417  | 2.419  | -0.744 | C |
| HETATM | 62 | H | 0 | 5.842  | 1.402  | -0.622 | H |
| HETATM | 63 | H | 0 | 5.755  | 2.787  | -1.729 | H |
| HETATM | 64 | H | 0 | 5.880  | 3.049  | 0.035  | H |
| HETATM | 65 | C | 0 | 4.992  | -3.322 | -1.577 | C |
| HETATM | 66 | H | 0 | 5.366  | -3.555 | -2.590 | H |
| HETATM | 67 | H | 0 | 5.807  | -2.814 | -1.035 | H |
| HETATM | 68 | H | 0 | 4.789  | -4.279 | -1.068 | H |
| HETATM | 69 | C | 0 | 3.910  | -1.142 | -2.360 | C |
| HETATM | 70 | H | 0 | 4.722  | -0.530 | -1.931 | H |
| HETATM | 71 | H | 0 | 4.153  | -1.308 | -3.425 | H |
| HETATM | 72 | H | 0 | 2.971  | -0.567 | -2.310 | H |
| HETATM | 73 | H | 0 | -3.127 | 3.539  | 0.009  | H |
| HETATM | 74 | H | 0 | -0.827 | 4.186  | 0.198  | H |
| HETATM | 75 | C | 0 | 0.461  | -2.958 | 0.714  | C |
| HETATM | 76 | H | 0 | 0.871  | -3.169 | -0.275 | H |
| HETATM | 77 | C | 0 | -1.972 | -1.643 | 0.281  | C |
| HETATM | 78 | H | 0 | 0.605  | -2.110 | 2.632  | H |

|        |    |   |   |        |        |        |   |
|--------|----|---|---|--------|--------|--------|---|
| HETATM | 79 | H | 0 | -0.383 | -3.577 | 1.045  | H |
| HETATM | 80 | F | 0 | -2.927 | -1.778 | 1.175  | F |
| HETATM | 81 | F | 0 | -2.290 | -2.465 | -0.703 | F |

END

## a2a.pdb

| TITLE  | a2a.pdb |    |   |        |        |        |    |
|--------|---------|----|---|--------|--------|--------|----|
| HETATM | 1       | Ru | 0 | -0.001 | 0.264  | 0.226  | Ru |
| HETATM | 2       | C  | 0 | 0.578  | -3.925 | -0.564 | C  |
| HETATM | 3       | C  | 0 | -0.937 | -3.796 | -0.580 | C  |
| HETATM | 4       | H  | 0 | 0.947  | -4.598 | 0.236  | H  |
| HETATM | 5       | H  | 0 | -1.440 | -4.463 | 0.144  | H  |
| HETATM | 6       | C  | 0 | 0.003  | -1.678 | -0.087 | C  |
| HETATM | 7       | N  | 0 | -1.151 | -2.400 | -0.213 | N  |
| HETATM | 8       | N  | 0 | 1.025  | -2.555 | -0.317 | N  |
| HETATM | 9       | Cl | 0 | -0.675 | 0.098  | 2.514  | Cl |
| HETATM | 10      | Cl | 0 | -0.283 | 0.772  | -2.083 | Cl |
| HETATM | 11      | C  | 0 | 1.810  | 0.597  | 0.319  | C  |
| HETATM | 12      | H  | 0 | 2.603  | -0.120 | 0.586  | H  |
| HETATM | 13      | C  | 0 | 2.262  | 1.910  | -0.088 | C  |
| HETATM | 14      | C  | 0 | 1.328  | 2.967  | -0.111 | C  |
| HETATM | 15      | C  | 0 | 3.563  | 2.143  | -0.571 | C  |
| HETATM | 16      | C  | 0 | 1.654  | 4.201  | -0.663 | C  |
| HETATM | 17      | C  | 0 | 3.900  | 3.384  | -1.106 | C  |
| HETATM | 18      | H  | 0 | 4.294  | 1.324  | -0.544 | H  |
| HETATM | 19      | C  | 0 | 2.944  | 4.402  | -1.165 | C  |
| HETATM | 20      | H  | 0 | 0.900  | 4.990  | -0.725 | H  |
| HETATM | 21      | H  | 0 | 4.909  | 3.557  | -1.497 | H  |
| HETATM | 22      | H  | 0 | 3.202  | 5.370  | -1.610 | H  |
| HETATM | 23      | O  | 0 | 0.101  | 2.689  | 0.451  | O  |
| HETATM | 24      | C  | 0 | -0.162 | 3.313  | 1.761  | C  |
| HETATM | 25      | H  | 0 | -0.986 | 2.688  | 2.140  | H  |
| HETATM | 26      | C  | 0 | -2.494 | -1.933 | -0.093 | C  |
| HETATM | 27      | C  | 0 | -3.205 | -1.551 | -1.251 | C  |
| HETATM | 28      | C  | 0 | -3.147 | -2.035 | 1.154  | C  |
| HETATM | 29      | C  | 0 | -4.548 | -1.181 | -1.117 | C  |
| HETATM | 30      | C  | 0 | -4.485 | -1.638 | 1.241  | C  |
| HETATM | 31      | C  | 0 | -5.197 | -1.194 | 0.120  | C  |
| HETATM | 32      | H  | 0 | -5.097 | -0.861 | -2.013 | H  |
| HETATM | 33      | H  | 0 | -4.990 | -1.692 | 2.214  | H  |
| HETATM | 34      | C  | 0 | 2.422  | -2.328 | -0.188 | C  |
| HETATM | 35      | C  | 0 | 3.177  | -1.990 | -1.325 | C  |
| HETATM | 36      | C  | 0 | 3.024  | -2.464 | 1.076  | C  |
| HETATM | 37      | C  | 0 | 4.554  | -1.797 | -1.176 | C  |
| HETATM | 38      | C  | 0 | 4.404  | -2.261 | 1.184  | C  |
| HETATM | 39      | C  | 0 | 5.183  | -1.926 | 0.070  | C  |
| HETATM | 40      | H  | 0 | 5.150  | -1.527 | -2.058 | H  |
| HETATM | 41      | H  | 0 | 4.880  | -2.356 | 2.169  | H  |
| HETATM | 42      | C  | 0 | -2.598 | -1.613 | -2.620 | C  |
| HETATM | 43      | H  | 0 | -2.859 | -0.719 | -3.211 | H  |
| HETATM | 44      | H  | 0 | -1.500 | -1.671 | -2.605 | H  |
| HETATM | 45      | H  | 0 | -2.986 | -2.491 | -3.174 | H  |
| HETATM | 46      | C  | 0 | -2.483 | -2.647 | 2.350  | C  |
| HETATM | 47      | H  | 0 | -2.746 | -2.107 | 3.274  | H  |
| HETATM | 48      | H  | 0 | -2.821 | -3.695 | 2.479  | H  |
| HETATM | 49      | H  | 0 | -1.386 | -2.648 | 2.278  | H  |
| HETATM | 50      | C  | 0 | -6.609 | -0.711 | 0.249  | C  |
| HETATM | 51      | H  | 0 | -6.636 | 0.376  | 0.463  | H  |
| HETATM | 52      | H  | 0 | -7.185 | -0.863 | -0.680 | H  |
| HETATM | 53      | H  | 0 | -7.146 | -1.208 | 1.074  | H  |



|        |    |   |   |        |        |        |   |
|--------|----|---|---|--------|--------|--------|---|
| HETATM | 54 | C | 0 | 2.502  | -1.775 | -2.644 | C |
| HETATM | 55 | H | 0 | 3.236  | -1.600 | -3.447 | H |
| HETATM | 56 | H | 0 | 1.876  | -2.636 | -2.942 | H |
| HETATM | 57 | H | 0 | 1.820  | -0.903 | -2.606 | H |
| HETATM | 58 | C | 0 | 2.180  | -2.716 | 2.287  | C |
| HETATM | 59 | H | 0 | 1.509  | -3.587 | 2.167  | H |
| HETATM | 60 | H | 0 | 2.798  | -2.890 | 3.183  | H |
| HETATM | 61 | H | 0 | 1.519  | -1.850 | 2.495  | H |
| HETATM | 62 | C | 0 | 6.655  | -1.678 | 0.206  | C |
| HETATM | 63 | H | 0 | 7.050  | -2.049 | 1.166  | H |
| HETATM | 64 | H | 0 | 7.230  | -2.159 | -0.605 | H |
| HETATM | 65 | H | 0 | 6.889  | -0.598 | 0.155  | H |
| HETATM | 66 | C | 0 | -0.630 | 4.741  | 1.596  | C |
| HETATM | 67 | H | 0 | -1.065 | 5.097  | 2.547  | H |
| HETATM | 68 | H | 0 | 0.195  | 5.428  | 1.341  | H |
| HETATM | 69 | H | 0 | -1.408 | 4.817  | 0.818  | H |
| HETATM | 70 | C | 0 | 1.017  | 3.156  | 2.693  | C |
| HETATM | 71 | H | 0 | 1.884  | 3.762  | 2.373  | H |
| HETATM | 72 | H | 0 | 0.729  | 3.487  | 3.706  | H |
| HETATM | 73 | H | 0 | 1.320  | 2.097  | 2.763  | H |
| HETATM | 74 | H | 0 | -1.378 | -3.999 | -1.576 | H |
| HETATM | 75 | H | 0 | 0.996  | -4.300 | -1.517 | H |
| HETATM | 76 | C | 0 | -3.057 | 2.269  | -0.942 | C |
| HETATM | 77 | C | 0 | -3.109 | 1.750  | 0.278  | C |
| HETATM | 78 | H | 0 | -3.594 | 0.786  | 0.452  | H |
| HETATM | 79 | H | 0 | -2.672 | 2.296  | 1.115  | H |
| HETATM | 80 | F | 0 | -2.499 | 3.422  | -1.247 | F |
| HETATM | 81 | F | 0 | -3.569 | 1.725  | -2.025 | F |

END

## a2b.pdb

| TITLE  | a2b.pdb |    |   |        |        |        |    |
|--------|---------|----|---|--------|--------|--------|----|
| HETATM | 1       | Ru | 0 | 0.594  | -0.498 | -0.271 | Ru |
| HETATM | 2       | C  | 0 | 1.081  | 3.499  | 1.197  | C  |
| HETATM | 3       | C  | 0 | 2.513  | 2.987  | 1.190  | C  |
| HETATM | 4       | H  | 0 | 0.687  | 3.652  | 2.222  | H  |
| HETATM | 5       | H  | 0 | 3.003  | 3.044  | 2.180  | H  |
| HETATM | 6       | C  | 0 | 1.093  | 1.296  | 0.356  | C  |
| HETATM | 7       | N  | 0 | 2.359  | 1.597  | 0.774  | N  |
| HETATM | 8       | N  | 0 | 0.339  | 2.423  | 0.538  | N  |
| HETATM | 9       | Cl | 0 | 0.755  | -1.350 | 1.998  | Cl |
| HETATM | 10      | Cl | 0 | 1.494  | -0.214 | -2.494 | Cl |
| HETATM | 11      | C  | 0 | -1.060 | 0.036  | -0.937 | C  |
| HETATM | 12      | H  | 0 | -0.983 | 0.897  | -1.627 | H  |
| HETATM | 13      | C  | 0 | -2.417 | -0.466 | -0.932 | C  |
| HETATM | 14      | C  | 0 | -2.950 | -1.397 | 0.013  | C  |
| HETATM | 15      | C  | 0 | -3.295 | 0.065  | -1.907 | C  |
| HETATM | 16      | C  | 0 | -4.306 | -1.752 | -0.060 | C  |
| HETATM | 17      | C  | 0 | -4.630 | -0.305 | -1.982 | C  |
| HETATM | 18      | H  | 0 | -2.884 | 0.790  | -2.621 | H  |
| HETATM | 19      | C  | 0 | -5.130 | -1.215 | -1.047 | C  |
| HETATM | 20      | H  | 0 | -4.724 | -2.475 | 0.641  | H  |
| HETATM | 21      | H  | 0 | -5.281 | 0.114  | -2.757 | H  |
| HETATM | 22      | H  | 0 | -6.182 | -1.522 | -1.085 | H  |
| HETATM | 23      | O  | 0 | -2.077 | -1.865 | 0.907  | O  |
| HETATM | 24      | C  | 0 | -2.425 | -2.608 | 2.093  | C  |
| HETATM | 25      | H  | 0 | -1.458 | -2.575 | 2.625  | H  |
| HETATM | 26      | C  | 0 | 3.512  | 0.800  | 0.490  | C  |
| HETATM | 27      | C  | 0 | 4.140  | 0.925  | -0.769 | C  |
| HETATM | 28      | C  | 0 | 4.054  | -0.036 | 1.485  | C  |

|        |    |   |   |        |        |        |   |
|--------|----|---|---|--------|--------|--------|---|
| HETATM | 29 | C | 0 | 5.229  | 0.101  | -1.057 | C |
| HETATM | 30 | C | 0 | 5.144  | -0.850 | 1.149  | C |
| HETATM | 31 | C | 0 | 5.725  | -0.815 | -0.121 | C |
| HETATM | 32 | H | 0 | 5.704  | 0.179  | -2.044 | H |
| HETATM | 33 | H | 0 | 5.557  | -1.520 | 1.915  | H |
| HETATM | 34 | C | 0 | -1.072 | 2.568  | 0.391  | C |
| HETATM | 35 | C | 0 | -1.567 | 3.226  | -0.752 | C |
| HETATM | 36 | C | 0 | -1.941 | 2.102  | 1.393  | C |
| HETATM | 37 | C | 0 | -2.947 | 3.388  | -0.886 | C |
| HETATM | 38 | C | 0 | -3.320 | 2.279  | 1.216  | C |
| HETATM | 39 | C | 0 | -3.840 | 2.914  | 0.087  | C |
| HETATM | 40 | H | 0 | -3.340 | 3.877  | -1.788 | H |
| HETATM | 41 | H | 0 | -4.007 | 1.898  | 1.985  | H |
| HETATM | 42 | C | 0 | 3.729  | 1.980  | -1.752 | C |
| HETATM | 43 | H | 0 | 3.913  | 1.653  | -2.787 | H |
| HETATM | 44 | H | 0 | 2.660  | 2.236  | -1.685 | H |
| HETATM | 45 | H | 0 | 4.317  | 2.907  | -1.593 | H |
| HETATM | 46 | C | 0 | 3.576  | -0.003 | 2.905  | C |
| HETATM | 47 | H | 0 | 3.419  | -1.018 | 3.305  | H |
| HETATM | 48 | H | 0 | 4.336  | 0.486  | 3.547  | H |
| HETATM | 49 | H | 0 | 2.625  | 0.538  | 3.020  | H |
| HETATM | 50 | C | 0 | 6.858  | -1.729 | -0.477 | C |
| HETATM | 51 | H | 0 | 6.510  | -2.574 | -1.101 | H |
| HETATM | 52 | H | 0 | 7.639  | -1.212 | -1.061 | H |
| HETATM | 53 | H | 0 | 7.335  | -2.165 | 0.418  | H |
| HETATM | 54 | C | 0 | -0.627 | 3.656  | -1.838 | C |
| HETATM | 55 | H | 0 | -1.165 | 4.150  | -2.663 | H |
| HETATM | 56 | H | 0 | 0.146  | 4.360  | -1.477 | H |
| HETATM | 57 | H | 0 | -0.077 | 2.792  | -2.261 | H |
| HETATM | 58 | C | 0 | -1.414 | 1.378  | 2.589  | C |
| HETATM | 59 | H | 0 | -0.460 | 1.795  | 2.958  | H |
| HETATM | 60 | H | 0 | -2.139 | 1.391  | 3.420  | H |
| HETATM | 61 | H | 0 | -1.187 | 0.324  | 2.343  | H |
| HETATM | 62 | C | 0 | -5.317 | 3.095  | -0.090 | C |
| HETATM | 63 | H | 0 | -5.643 | 2.799  | -1.103 | H |
| HETATM | 64 | H | 0 | -5.893 | 2.498  | 0.636  | H |
| HETATM | 65 | H | 0 | -5.618 | 4.151  | 0.040  | H |
| HETATM | 66 | C | 0 | -2.735 | -4.059 | 1.783  | C |
| HETATM | 67 | H | 0 | -2.816 | -4.629 | 2.725  | H |
| HETATM | 68 | H | 0 | -3.678 | -4.201 | 1.228  | H |
| HETATM | 69 | H | 0 | -1.923 | -4.513 | 1.190  | H |
| HETATM | 70 | C | 0 | -3.449 | -1.907 | 2.969  | C |
| HETATM | 71 | H | 0 | -4.492 | -2.016 | 2.630  | H |
| HETATM | 72 | H | 0 | -3.394 | -2.329 | 3.988  | H |
| HETATM | 73 | H | 0 | -3.224 | -0.830 | 3.047  | H |
| HETATM | 74 | H | 0 | 3.157  | 3.531  | 0.471  | H |
| HETATM | 75 | H | 0 | 0.952  | 4.454  | 0.655  | H |
| HETATM | 76 | C | 0 | -0.311 | -3.125 | -1.711 | C |
| HETATM | 77 | C | 0 | 0.693  | -3.053 | -0.826 | C |
| HETATM | 78 | H | 0 | 1.704  | -2.860 | -1.195 | H |
| HETATM | 79 | H | 0 | 0.523  | -3.356 | 0.209  | H |
| HETATM | 80 | F | 0 | -1.533 | -3.501 | -1.418 | F |
| HETATM | 81 | F | 0 | -0.224 | -2.865 | -2.983 | F |

END

## a2c.pdb

|        |         |    |   |       |        |        |    |
|--------|---------|----|---|-------|--------|--------|----|
| TITLE  | a2c.pdb |    |   |       |        |        |    |
| HETATM | 1       | Ru | 0 | 0.699 | -0.405 | -0.483 | Ru |
| HETATM | 2       | C  | 0 | 1.067 | 3.628  | 0.951  | C  |
| HETATM | 3       | C  | 0 | 2.454 | 3.048  | 1.211  | C  |

|        |    |    |   |        |        |        |    |
|--------|----|----|---|--------|--------|--------|----|
| HETATM | 4  | H  | 0 | 0.610  | 4.081  | 1.849  | H  |
| HETATM | 5  | H  | 0 | 2.702  | 2.996  | 2.291  | H  |
| HETATM | 6  | C  | 0 | 1.072  | 1.366  | 0.308  | C  |
| HETATM | 7  | N  | 0 | 2.346  | 1.706  | 0.650  | N  |
| HETATM | 8  | N  | 0 | 0.293  | 2.462  | 0.520  | N  |
| HETATM | 9  | Cl | 0 | 0.659  | -1.691 | 1.569  | Cl |
| HETATM | 10 | Cl | 0 | 1.419  | 0.483  | -2.651 | Cl |
| HETATM | 11 | C  | 0 | -1.040 | 0.034  | -1.004 | C  |
| HETATM | 12 | H  | 0 | -1.023 | 0.893  | -1.702 | H  |
| HETATM | 13 | C  | 0 | -2.361 | -0.567 | -1.008 | C  |
| HETATM | 14 | C  | 0 | -2.957 | -1.330 | 0.043  | C  |
| HETATM | 15 | C  | 0 | -3.112 | -0.360 | -2.189 | C  |
| HETATM | 16 | C  | 0 | -4.211 | -1.927 | -0.174 | C  |
| HETATM | 17 | C  | 0 | -4.350 | -0.953 | -2.393 | C  |
| HETATM | 18 | H  | 0 | -2.665 | 0.265  | -2.974 | H  |
| HETATM | 19 | C  | 0 | -4.889 | -1.748 | -1.377 | C  |
| HETATM | 20 | H  | 0 | -4.679 | -2.525 | 0.609  | H  |
| HETATM | 21 | H  | 0 | -4.894 | -0.796 | -3.330 | H  |
| HETATM | 22 | H  | 0 | -5.867 | -2.224 | -1.512 | H  |
| HETATM | 23 | O  | 0 | -2.290 | -1.343 | 1.194  | O  |
| HETATM | 24 | C  | 0 | -2.561 | -2.213 | 2.312  | C  |
| HETATM | 25 | H  | 0 | -1.707 | -1.958 | 2.963  | H  |
| HETATM | 26 | C  | 0 | 3.447  | 0.802  | 0.561  | C  |
| HETATM | 27 | C  | 0 | 4.275  | 0.823  | -0.581 | C  |
| HETATM | 28 | C  | 0 | 3.710  | -0.082 | 1.630  | C  |
| HETATM | 29 | C  | 0 | 5.275  | -0.150 | -0.695 | C  |
| HETATM | 30 | C  | 0 | 4.718  | -1.038 | 1.470  | C  |
| HETATM | 31 | C  | 0 | 5.488  | -1.105 | 0.304  | C  |
| HETATM | 32 | H  | 0 | 5.907  | -0.153 | -1.593 | H  |
| HETATM | 33 | H  | 0 | 4.908  | -1.746 | 2.288  | H  |
| HETATM | 34 | C  | 0 | -1.128 | 2.516  | 0.454  | C  |
| HETATM | 35 | C  | 0 | -1.761 | 3.120  | -0.649 | C  |
| HETATM | 36 | C  | 0 | -1.876 | 1.986  | 1.524  | C  |
| HETATM | 37 | C  | 0 | -3.159 | 3.139  | -0.686 | C  |
| HETATM | 38 | C  | 0 | -3.271 | 2.028  | 1.447  | C  |
| HETATM | 39 | C  | 0 | -3.929 | 2.582  | 0.342  | C  |
| HETATM | 40 | H  | 0 | -3.661 | 3.580  | -1.558 | H  |
| HETATM | 41 | H  | 0 | -3.861 | 1.604  | 2.270  | H  |
| HETATM | 42 | C  | 0 | 4.172  | 1.907  | -1.609 | C  |
| HETATM | 43 | H  | 0 | 4.383  | 1.525  | -2.620 | H  |
| HETATM | 44 | H  | 0 | 3.174  | 2.369  | -1.643 | H  |
| HETATM | 45 | H  | 0 | 4.916  | 2.702  | -1.398 | H  |
| HETATM | 46 | C  | 0 | 3.007  | 0.051  | 2.946  | C  |
| HETATM | 47 | H  | 0 | 2.908  | -0.924 | 3.450  | H  |
| HETATM | 48 | H  | 0 | 3.583  | 0.716  | 3.620  | H  |
| HETATM | 49 | H  | 0 | 1.991  | 0.464  | 2.849  | H  |
| HETATM | 50 | C  | 0 | 6.522  | -2.177 | 0.133  | C  |
| HETATM | 51 | H  | 0 | 6.073  | -3.108 | -0.263 | H  |
| HETATM | 52 | H  | 0 | 7.313  | -1.879 | -0.577 | H  |
| HETATM | 53 | H  | 0 | 7.003  | -2.444 | 1.090  | H  |
| HETATM | 54 | C  | 0 | -0.955 | 3.666  | -1.788 | C  |
| HETATM | 55 | H  | 0 | -1.591 | 3.862  | -2.667 | H  |
| HETATM | 56 | H  | 0 | -0.462 | 4.623  | -1.532 | H  |
| HETATM | 57 | H  | 0 | -0.154 | 2.967  | -2.098 | H  |
| HETATM | 58 | C  | 0 | -1.179 | 1.366  | 2.693  | C  |
| HETATM | 59 | H  | 0 | -0.390 | 2.027  | 3.101  | H  |
| HETATM | 60 | H  | 0 | -1.885 | 1.144  | 3.512  | H  |
| HETATM | 61 | H  | 0 | -0.681 | 0.418  | 2.407  | H  |
| HETATM | 62 | C  | 0 | -5.423 | 2.532  | 0.245  | C  |
| HETATM | 63 | H  | 0 | -5.761 | 1.543  | -0.122 | H  |
| HETATM | 64 | H  | 0 | -5.907 | 2.686  | 1.225  | H  |
| HETATM | 65 | H  | 0 | -5.820 | 3.285  | -0.456 | H  |

|        |    |   |   |        |        |        |   |
|--------|----|---|---|--------|--------|--------|---|
| HETATM | 66 | C | 0 | -2.427 | -3.676 | 1.942  | C |
| HETATM | 67 | H | 0 | -2.496 | -4.295 | 2.854  | H |
| HETATM | 68 | H | 0 | -3.209 | -4.024 | 1.245  | H |
| HETATM | 69 | H | 0 | -1.442 | -3.856 | 1.481  | H |
| HETATM | 70 | C | 0 | -3.835 | -1.852 | 3.056  | C |
| HETATM | 71 | H | 0 | -4.761 | -2.204 | 2.572  | H |
| HETATM | 72 | H | 0 | -3.805 | -2.305 | 4.063  | H |
| HETATM | 73 | H | 0 | -3.915 | -0.760 | 3.189  | H |
| HETATM | 74 | H | 0 | 3.261  | 3.615  | 0.712  | H |
| HETATM | 75 | H | 0 | 1.072  | 4.401  | 0.158  | H |
| HETATM | 76 | C | 0 | 0.036  | -2.745 | -1.796 | C |
| HETATM | 77 | C | 0 | 1.327  | -2.563 | -1.451 | C |
| HETATM | 78 | H | 0 | 2.017  | -2.162 | -2.199 | H |
| HETATM | 79 | H | 0 | 1.691  | -3.021 | -0.527 | H |
| HETATM | 80 | F | 0 | -0.851 | -3.377 | -1.067 | F |
| HETATM | 81 | F | 0 | -0.484 | -2.411 | -2.947 | F |

END

## a2d.pdb

| TITLE  | a2d.pdb |    |   |        |        |        |    |
|--------|---------|----|---|--------|--------|--------|----|
| HETATM | 1       | Ru | 0 | 0.532  | -0.668 | -0.093 | Ru |
| HETATM | 2       | C  | 0 | 1.169  | 3.616  | 0.211  | C  |
| HETATM | 3       | C  | 0 | 2.585  | 3.135  | 0.514  | C  |
| HETATM | 4       | H  | 0 | 0.748  | 4.259  | 1.002  | H  |
| HETATM | 5       | H  | 0 | 2.891  | 3.323  | 1.562  | H  |
| HETATM | 6       | C  | 0 | 1.224  | 1.279  | 0.116  | C  |
| HETATM | 7       | N  | 0 | 2.495  | 1.690  | 0.281  | N  |
| HETATM | 8       | N  | 0 | 0.419  | 2.358  | 0.120  | N  |
| HETATM | 9       | Cl | 0 | -0.133 | -0.475 | 2.233  | Cl |
| HETATM | 10      | Cl | 0 | 1.883  | -0.726 | -2.151 | Cl |
| HETATM | 11      | C  | 0 | -0.844 | -1.272 | -1.281 | C  |
| HETATM | 12      | H  | 0 | -0.433 | -1.579 | -2.259 | H  |
| HETATM | 13      | C  | 0 | -2.284 | -1.138 | -1.350 | C  |
| HETATM | 14      | C  | 0 | -3.189 | -1.085 | -0.246 | C  |
| HETATM | 15      | C  | 0 | -2.820 | -1.029 | -2.656 | C  |
| HETATM | 16      | C  | 0 | -4.560 | -0.898 | -0.491 | C  |
| HETATM | 17      | C  | 0 | -4.174 | -0.833 | -2.884 | C  |
| HETATM | 18      | H  | 0 | -2.124 | -1.091 | -3.502 | H  |
| HETATM | 19      | C  | 0 | -5.042 | -0.766 | -1.789 | C  |
| HETATM | 20      | H  | 0 | -5.259 | -0.832 | 0.347  | H  |
| HETATM | 21      | H  | 0 | -4.557 | -0.741 | -3.906 | H  |
| HETATM | 22      | H  | 0 | -6.116 | -0.612 | -1.946 | H  |
| HETATM | 23      | O  | 0 | -2.636 | -1.217 | 0.949  | O  |
| HETATM | 24      | C  | 0 | -3.303 | -1.652 | 2.147  | C  |
| HETATM | 25      | H  | 0 | -2.433 | -1.946 | 2.760  | H  |
| HETATM | 26      | C  | 0 | 3.660  | 0.862  | 0.268  | C  |
| HETATM | 27      | C  | 0 | 4.478  | 0.869  | -0.882 | C  |
| HETATM | 28      | C  | 0 | 4.004  | 0.094  | 1.394  | C  |
| HETATM | 29      | C  | 0 | 5.604  | 0.046  | -0.906 | C  |
| HETATM | 30      | C  | 0 | 5.140  | -0.725 | 1.322  | C  |
| HETATM | 31      | C  | 0 | 5.941  | -0.772 | 0.180  | C  |
| HETATM | 32      | H  | 0 | 6.229  | 0.031  | -1.809 | H  |
| HETATM | 33      | H  | 0 | 5.409  | -1.330 | 2.198  | H  |
| HETATM | 34      | C  | 0 | -1.004 | 2.337  | 0.005  | C  |
| HETATM | 35      | C  | 0 | -1.597 | 2.166  | -1.261 | C  |
| HETATM | 36      | C  | 0 | -1.789 | 2.568  | 1.153  | C  |
| HETATM | 37      | C  | 0 | -2.993 | 2.197  | -1.352 | C  |
| HETATM | 38      | C  | 0 | -3.179 | 2.587  | 1.015  | C  |
| HETATM | 39      | C  | 0 | -3.798 | 2.404  | -0.228 | C  |
| HETATM | 40      | H  | 0 | -3.462 | 2.051  | -2.333 | H  |

|        |    |   |   |        |        |        |   |
|--------|----|---|---|--------|--------|--------|---|
| HETATM | 41 | H | 0 | -3.797 | 2.752  | 1.908  | H |
| HETATM | 42 | C | 0 | 4.165  | 1.744  | -2.058 | C |
| HETATM | 43 | H | 0 | 4.552  | 1.301  | -2.991 | H |
| HETATM | 44 | H | 0 | 3.080  | 1.884  | -2.194 | H |
| HETATM | 45 | H | 0 | 4.634  | 2.744  | -1.961 | H |
| HETATM | 46 | C | 0 | 3.223  | 0.143  | 2.671  | C |
| HETATM | 47 | H | 0 | 2.532  | 1.001  | 2.723  | H |
| HETATM | 48 | H | 0 | 2.590  | -0.751 | 2.807  | H |
| HETATM | 49 | H | 0 | 3.904  | 0.191  | 3.540  | H |
| HETATM | 50 | C | 0 | 7.127  | -1.685 | 0.105  | C |
| HETATM | 51 | H | 0 | 6.893  | -2.597 | -0.477 | H |
| HETATM | 52 | H | 0 | 7.986  | -1.207 | -0.397 | H |
| HETATM | 53 | H | 0 | 7.457  | -2.017 | 1.104  | H |
| HETATM | 54 | C | 0 | -0.760 | 1.998  | -2.494 | C |
| HETATM | 55 | H | 0 | -1.395 | 1.923  | -3.393 | H |
| HETATM | 56 | H | 0 | -0.076 | 2.856  | -2.644 | H |
| HETATM | 57 | H | 0 | -0.111 | 1.101  | -2.465 | H |
| HETATM | 58 | C | 0 | -1.161 | 2.830  | 2.488  | C |
| HETATM | 59 | H | 0 | -1.033 | 3.917  | 2.666  | H |
| HETATM | 60 | H | 0 | -1.794 | 2.449  | 3.307  | H |
| HETATM | 61 | H | 0 | -0.176 | 2.346  | 2.588  | H |
| HETATM | 62 | C | 0 | -5.291 | 2.461  | -0.349 | C |
| HETATM | 63 | H | 0 | -5.788 | 1.809  | 0.393  | H |
| HETATM | 64 | H | 0 | -5.674 | 3.483  | -0.170 | H |
| HETATM | 65 | H | 0 | -5.633 | 2.150  | -1.350 | H |
| HETATM | 66 | C | 0 | -4.161 | -2.885 | 1.938  | C |
| HETATM | 67 | H | 0 | -4.395 | -3.330 | 2.921  | H |
| HETATM | 68 | H | 0 | -5.121 | -2.689 | 1.432  | H |
| HETATM | 69 | H | 0 | -3.611 | -3.645 | 1.356  | H |
| HETATM | 70 | C | 0 | -3.981 | -0.496 | 2.853  | C |
| HETATM | 71 | H | 0 | -4.836 | -0.080 | 2.290  | H |
| HETATM | 72 | H | 0 | -4.356 | -0.825 | 3.838  | H |
| HETATM | 73 | H | 0 | -3.249 | 0.311  | 3.019  | H |
| HETATM | 74 | H | 0 | 3.349  | 3.586  | -0.142 | H |
| HETATM | 75 | H | 0 | 1.095  | 4.170  | -0.745 | H |
| HETATM | 76 | C | 0 | 0.088  | -2.935 | -0.237 | C |
| HETATM | 77 | C | 0 | 1.349  | -2.544 | 0.306  | C |
| HETATM | 78 | H | 0 | 2.237  | -2.739 | -0.312 | H |
| HETATM | 79 | H | 0 | 1.455  | -2.628 | 1.396  | H |
| HETATM | 80 | F | 0 | 0.084  | -3.649 | -1.369 | F |
| HETATM | 81 | F | 0 | -0.865 | -3.406 | 0.569  | F |

END

## a2I.pdb

|        |         |    |   |        |        |        |    |
|--------|---------|----|---|--------|--------|--------|----|
| TITLE  | a2I.pdb |    |   |        |        |        |    |
| HETATM | 1       | Ru | 0 | 0.381  | -0.503 | 0.132  | Ru |
| HETATM | 2       | C  | 0 | 1.477  | 3.542  | -0.045 | C  |
| HETATM | 3       | C  | 0 | 2.831  | 2.993  | 0.391  | C  |
| HETATM | 4       | H  | 0 | 1.078  | 4.310  | 0.639  | H  |
| HETATM | 5       | H  | 0 | 3.071  | 3.227  | 1.447  | H  |
| HETATM | 6       | C  | 0 | 1.370  | 1.219  | 0.086  | C  |
| HETATM | 7       | N  | 0 | 2.666  | 1.540  | 0.241  | N  |
| HETATM | 8       | N  | 0 | 0.635  | 2.344  | -0.016 | N  |
| HETATM | 9       | Cl | 0 | -0.290 | -0.256 | 2.383  | Cl |
| HETATM | 10      | Cl | 0 | 1.758  | -0.649 | -1.968 | Cl |
| HETATM | 11      | C  | 0 | -0.891 | -1.604 | -1.139 | C  |
| HETATM | 12      | H  | 0 | -0.375 | -1.712 | -2.103 | H  |
| HETATM | 13      | C  | 0 | -2.308 | -1.292 | -1.360 | C  |
| HETATM | 14      | C  | 0 | -3.259 | -1.078 | -0.325 | C  |
| HETATM | 15      | C  | 0 | -2.747 | -1.172 | -2.695 | C  |

|        |    |   |   |        |        |        |   |
|--------|----|---|---|--------|--------|--------|---|
| HETATM | 16 | C | 0 | -4.599 | -0.815 | -0.652 | C |
| HETATM | 17 | C | 0 | -4.075 | -0.911 | -3.014 | C |
| HETATM | 18 | H | 0 | -2.012 | -1.321 | -3.496 | H |
| HETATM | 19 | C | 0 | -5.003 | -0.739 | -1.983 | C |
| HETATM | 20 | H | 0 | -5.324 | -0.632 | 0.145  | H |
| HETATM | 21 | H | 0 | -4.388 | -0.847 | -4.062 | H |
| HETATM | 22 | H | 0 | -6.054 | -0.527 | -2.214 | H |
| HETATM | 23 | O | 0 | -2.765 | -1.058 | 0.914  | O |
| HETATM | 24 | C | 0 | -3.464 | -1.484 | 2.097  | C |
| HETATM | 25 | H | 0 | -2.619 | -1.805 | 2.732  | H |
| HETATM | 26 | C | 0 | 3.793  | 0.661  | 0.216  | C |
| HETATM | 27 | C | 0 | 4.623  | 0.674  | -0.923 | C |
| HETATM | 28 | C | 0 | 4.088  | -0.157 | 1.318  | C |
| HETATM | 29 | C | 0 | 5.735  | -0.169 | -0.947 | C |
| HETATM | 30 | C | 0 | 5.211  | -0.993 | 1.248  | C |
| HETATM | 31 | C | 0 | 6.039  | -1.018 | 0.124  | C |
| HETATM | 32 | H | 0 | 6.375  | -0.176 | -1.840 | H |
| HETATM | 33 | H | 0 | 5.446  | -1.634 | 2.108  | H |
| HETATM | 34 | C | 0 | -0.794 | 2.367  | -0.098 | C |
| HETATM | 35 | C | 0 | -1.433 | 2.090  | -1.324 | C |
| HETATM | 36 | C | 0 | -1.538 | 2.726  | 1.047  | C |
| HETATM | 37 | C | 0 | -2.832 | 2.138  | -1.369 | C |
| HETATM | 38 | C | 0 | -2.929 | 2.767  | 0.951  | C |
| HETATM | 39 | C | 0 | -3.593 | 2.472  | -0.247 | C |
| HETATM | 40 | H | 0 | -3.338 | 1.912  | -2.316 | H |
| HETATM | 41 | H | 0 | -3.513 | 3.034  | 1.842  | H |
| HETATM | 42 | C | 0 | 4.342  | 1.564  | -2.096 | C |
| HETATM | 43 | H | 0 | 4.657  | 1.082  | -3.037 | H |
| HETATM | 44 | H | 0 | 3.267  | 1.791  | -2.198 | H |
| HETATM | 45 | H | 0 | 4.895  | 2.522  | -2.031 | H |
| HETATM | 46 | C | 0 | 3.240  | -0.161 | 2.552  | C |
| HETATM | 47 | H | 0 | 2.723  | 0.799  | 2.720  | H |
| HETATM | 48 | H | 0 | 2.442  | -0.923 | 2.499  | H |
| HETATM | 49 | H | 0 | 3.845  | -0.390 | 3.446  | H |
| HETATM | 50 | C | 0 | 7.213  | -1.947 | 0.052  | C |
| HETATM | 51 | H | 0 | 6.964  | -2.860 | -0.523 | H |
| HETATM | 52 | H | 0 | 8.077  | -1.484 | -0.455 | H |
| HETATM | 53 | H | 0 | 7.540  | -2.278 | 1.052  | H |
| HETATM | 54 | C | 0 | -0.662 | 1.790  | -2.573 | C |
| HETATM | 55 | H | 0 | -1.238 | 2.083  | -3.467 | H |
| HETATM | 56 | H | 0 | 0.314  | 2.306  | -2.601 | H |
| HETATM | 57 | H | 0 | -0.422 | 0.716  | -2.672 | H |
| HETATM | 58 | C | 0 | -0.865 | 3.098  | 2.333  | C |
| HETATM | 59 | H | 0 | -0.719 | 4.194  | 2.410  | H |
| HETATM | 60 | H | 0 | -1.476 | 2.794  | 3.200  | H |
| HETATM | 61 | H | 0 | 0.119  | 2.615  | 2.449  | H |
| HETATM | 62 | C | 0 | -5.087 | 2.550  | -0.324 | C |
| HETATM | 63 | H | 0 | -5.569 | 2.019  | 0.517  | H |
| HETATM | 64 | H | 0 | -5.440 | 3.598  | -0.272 | H |
| HETATM | 65 | H | 0 | -5.472 | 2.116  | -1.262 | H |
| HETATM | 66 | C | 0 | -4.364 | -2.684 | 1.876  | C |
| HETATM | 67 | H | 0 | -4.617 | -3.127 | 2.855  | H |
| HETATM | 68 | H | 0 | -5.316 | -2.444 | 1.373  | H |
| HETATM | 69 | H | 0 | -3.845 | -3.459 | 1.286  | H |
| HETATM | 70 | C | 0 | -4.133 | -0.307 | 2.778  | C |
| HETATM | 71 | H | 0 | -4.965 | 0.110  | 2.182  | H |
| HETATM | 72 | H | 0 | -4.544 | -0.617 | 3.755  | H |
| HETATM | 73 | H | 0 | -3.394 | 0.492  | 2.955  | H |
| HETATM | 74 | H | 0 | 3.669  | 3.351  | -0.230 | H |
| HETATM | 75 | H | 0 | 1.491  | 3.973  | -1.066 | H |
| HETATM | 76 | C | 0 | -0.359 | -2.800 | -0.294 | C |
| HETATM | 77 | C | 0 | 0.973  | -2.428 | 0.360  | C |

|        |    |   |   |        |        |        |   |
|--------|----|---|---|--------|--------|--------|---|
| HETATM | 78 | H | 0 | 1.826  | -2.730 | -0.265 | H |
| HETATM | 79 | H | 0 | 1.046  | -2.749 | 1.412  | H |
| HETATM | 80 | F | 0 | -0.179 | -3.851 | -1.162 | F |
| HETATM | 81 | F | 0 | -1.256 | -3.245 | 0.632  | F |

END

## a2e.pdb

| TITLE  | a2e.pdb |    |   |        |        |        |    |
|--------|---------|----|---|--------|--------|--------|----|
| HETATM | 1       | Ru | 0 | 0.592  | -0.608 | -0.225 | Ru |
| HETATM | 2       | Cl | 0 | 1.667  | -0.349 | -2.414 | Cl |
| HETATM | 3       | Cl | 0 | -0.398 | -0.715 | 1.982  | Cl |
| HETATM | 4       | C  | 0 | 1.189  | 1.311  | 0.199  | C  |
| HETATM | 5       | N  | 0 | 2.461  | 1.688  | 0.436  | N  |
| HETATM | 6       | C  | 0 | 2.572  | 3.111  | 0.774  | C  |
| HETATM | 7       | C  | 0 | 1.142  | 3.617  | 0.604  | C  |
| HETATM | 8       | N  | 0 | 0.392  | 2.389  | 0.318  | N  |
| HETATM | 9       | C  | 0 | 3.616  | 0.848  | 0.390  | C  |
| HETATM | 10      | C  | 0 | 4.446  | 0.875  | -0.744 | C  |
| HETATM | 11      | C  | 0 | 5.562  | 0.029  | -0.770 | C  |
| HETATM | 12      | C  | 0 | 5.870  | -0.815 | 0.300  | C  |
| HETATM | 13      | C  | 0 | 5.053  | -0.783 | 1.437  | C  |
| HETATM | 14      | C  | 0 | 3.930  | 0.047  | 1.507  | C  |
| HETATM | 15      | C  | 0 | 4.186  | 1.805  | -1.889 | C  |
| HETATM | 16      | C  | 0 | 7.041  | -1.749 | 0.229  | C  |
| HETATM | 17      | C  | 0 | 3.090  | 0.093  | 2.746  | C  |
| HETATM | 18      | C  | 0 | -1.033 | 2.409  | 0.221  | C  |
| HETATM | 19      | C  | 0 | -1.804 | 2.478  | 1.398  | C  |
| HETATM | 20      | C  | 0 | -3.194 | 2.556  | 1.276  | C  |
| HETATM | 21      | C  | 0 | -3.823 | 2.598  | 0.027  | C  |
| HETATM | 22      | C  | 0 | -3.028 | 2.563  | -1.122 | C  |
| HETATM | 23      | C  | 0 | -1.635 | 2.459  | -1.050 | C  |
| HETATM | 24      | C  | 0 | -1.171 | 2.507  | 2.756  | C  |
| HETATM | 25      | C  | 0 | -5.316 | 2.676  | -0.070 | C  |
| HETATM | 26      | C  | 0 | -0.804 | 2.432  | -2.296 | C  |
| HETATM | 27      | H  | 0 | 3.291  | 3.604  | 0.095  | H  |
| HETATM | 28      | H  | 0 | 2.956  | 3.228  | 1.805  | H  |
| HETATM | 29      | H  | 0 | 1.029  | 4.333  | -0.232 | H  |
| HETATM | 30      | H  | 0 | 0.742  | 4.102  | 1.512  | H  |
| HETATM | 31      | H  | 0 | 6.203  | 0.029  | -1.661 | H  |
| HETATM | 32      | H  | 0 | 5.300  | -1.414 | 2.301  | H  |
| HETATM | 33      | H  | 0 | 4.743  | 2.756  | -1.768 | H  |
| HETATM | 34      | H  | 0 | 3.115  | 2.041  | -2.001 | H  |
| HETATM | 35      | H  | 0 | 4.514  | 1.360  | -2.843 | H  |
| HETATM | 36      | H  | 0 | 7.830  | -1.372 | -0.444 | H  |
| HETATM | 37      | H  | 0 | 6.739  | -2.740 | -0.160 | H  |
| HETATM | 38      | H  | 0 | 7.491  | -1.924 | 1.221  | H  |
| HETATM | 39      | H  | 0 | 2.054  | -0.255 | 2.573  | H  |
| HETATM | 40      | H  | 0 | 3.004  | 1.121  | 3.148  | H  |
| HETATM | 41      | H  | 0 | 3.524  | -0.535 | 3.542  | H  |
| HETATM | 42      | H  | 0 | -3.804 | 2.583  | 2.190  | H  |
| HETATM | 43      | H  | 0 | -3.503 | 2.610  | -2.109 | H  |
| HETATM | 44      | H  | 0 | -1.045 | 3.546  | 3.122  | H  |
| HETATM | 45      | H  | 0 | -0.188 | 2.011  | 2.771  | H  |
| HETATM | 46      | H  | 0 | -1.802 | 1.985  | 3.496  | H  |
| HETATM | 47      | H  | 0 | -5.722 | 3.538  | 0.490  | H  |
| HETATM | 48      | H  | 0 | -5.657 | 2.763  | -1.115 | H  |
| HETATM | 49      | H  | 0 | -5.794 | 1.774  | 0.359  | H  |
| HETATM | 50      | H  | 0 | -1.439 | 2.487  | -3.197 | H  |
| HETATM | 51      | H  | 0 | -0.092 | 3.279  | -2.338 | H  |
| HETATM | 52      | H  | 0 | -0.185 | 1.517  | -2.380 | H  |

|        |    |   |   |        |        |        |   |
|--------|----|---|---|--------|--------|--------|---|
| HETATM | 53 | C | 0 | -0.770 | -1.850 | -1.369 | C |
| HETATM | 54 | C | 0 | -2.143 | -1.329 | -1.412 | C |
| HETATM | 55 | C | 0 | -3.173 | -1.511 | -0.444 | C |
| HETATM | 56 | C | 0 | -4.456 | -1.002 | -0.712 | C |
| HETATM | 57 | C | 0 | -4.731 | -0.328 | -1.897 | C |
| HETATM | 58 | C | 0 | -3.729 | -0.132 | -2.849 | C |
| HETATM | 59 | C | 0 | -2.457 | -0.625 | -2.595 | C |
| HETATM | 60 | O | 0 | -2.857 | -2.243 | 0.623  | O |
| HETATM | 61 | C | 0 | -3.554 | -2.224 | 1.884  | C |
| HETATM | 62 | C | 0 | -3.894 | -0.829 | 2.373  | C |
| HETATM | 63 | C | 0 | -4.717 | -3.197 | 1.885  | C |
| HETATM | 64 | H | 0 | -0.309 | -1.821 | -2.366 | H |
| HETATM | 65 | H | 0 | -5.264 | -1.174 | 0.002  | H |
| HETATM | 66 | H | 0 | -5.748 | 0.041  | -2.078 | H |
| HETATM | 67 | H | 0 | -3.939 | 0.400  | -3.784 | H |
| HETATM | 68 | H | 0 | -1.655 | -0.483 | -3.331 | H |
| HETATM | 69 | H | 0 | -2.769 | -2.621 | 2.552  | H |
| HETATM | 70 | H | 0 | -4.797 | -0.397 | 1.910  | H |
| HETATM | 71 | H | 0 | -3.041 | -0.153 | 2.193  | H |
| HETATM | 72 | H | 0 | -4.072 | -0.865 | 3.463  | H |
| HETATM | 73 | H | 0 | -5.561 | -2.861 | 1.257  | H |
| HETATM | 74 | H | 0 | -5.101 | -3.320 | 2.913  | H |
| HETATM | 75 | H | 0 | -4.400 | -4.190 | 1.524  | H |
| HETATM | 76 | C | 0 | -0.053 | -2.836 | -0.603 | C |
| HETATM | 77 | C | 0 | 1.715  | -2.036 | 0.150  | C |
| HETATM | 78 | F | 0 | 0.631  | -3.725 | -1.355 | F |
| HETATM | 79 | F | 0 | -0.538 | -3.479 | 0.442  | F |
| HETATM | 80 | H | 0 | 2.472  | -2.389 | -0.576 | H |
| HETATM | 81 | H | 0 | 1.728  | -2.510 | 1.152  | H |

END

## a2f.pdb

| TITLE  | a2f.pdb |    |   |        |        |        |    |
|--------|---------|----|---|--------|--------|--------|----|
| HETATM | 1       | Ru | 0 | -0.496 | -0.487 | 0.395  | Ru |
| HETATM | 2       | C  | 0 | -1.428 | 3.514  | -0.637 | C  |
| HETATM | 3       | C  | 0 | -2.847 | 2.996  | -0.447 | C  |
| HETATM | 4       | H  | 0 | -1.209 | 3.787  | -1.689 | H  |
| HETATM | 5       | H  | 0 | -3.506 | 3.198  | -1.310 | H  |
| HETATM | 6       | C  | 0 | -1.341 | 1.228  | -0.113 | C  |
| HETATM | 7       | N  | 0 | -2.650 | 1.553  | -0.284 | N  |
| HETATM | 8       | N  | 0 | -0.611 | 2.367  | -0.241 | N  |
| HETATM | 9       | Cl | 0 | 0.284  | -1.097 | -1.802 | Cl |
| HETATM | 10      | Cl | 0 | -1.083 | 0.004  | 2.721  | Cl |
| HETATM | 11      | C  | 0 | 1.115  | -2.112 | 1.551  | C  |
| HETATM | 12      | C  | 0 | 2.340  | -1.304 | 1.495  | C  |
| HETATM | 13      | C  | 0 | 3.373  | -1.434 | 0.527  | C  |
| HETATM | 14      | C  | 0 | 2.523  | -0.391 | 2.553  | C  |
| HETATM | 15      | C  | 0 | 4.546  | -0.676 | 0.670  | C  |
| HETATM | 16      | C  | 0 | 3.684  | 0.362  | 2.677  | C  |
| HETATM | 17      | H  | 0 | 1.716  | -0.287 | 3.289  | H  |
| HETATM | 18      | C  | 0 | 4.698  | 0.212  | 1.732  | C  |
| HETATM | 19      | H  | 0 | 5.363  | -0.806 | -0.044 | H  |
| HETATM | 20      | H  | 0 | 3.795  | 1.066  | 3.510  | H  |
| HETATM | 21      | H  | 0 | 5.627  | 0.789  | 1.818  | H  |
| HETATM | 22      | O  | 0 | 3.178  | -2.360 | -0.420 | O  |
| HETATM | 23      | C  | 0 | 3.770  | -2.336 | -1.733 | C  |
| HETATM | 24      | H  | 0 | 3.028  | -2.925 | -2.301 | H  |
| HETATM | 25      | C  | 0 | -3.757 | 0.661  | -0.344 | C  |
| HETATM | 26      | C  | 0 | -4.639 | 0.544  | 0.748  | C  |
| HETATM | 27      | C  | 0 | -3.994 | -0.037 | -1.548 | C  |



|        |    |   |   |        |        |        |   |
|--------|----|---|---|--------|--------|--------|---|
| HETATM | 28 | C | 0 | -5.732 | -0.321 | 0.629  | C |
| HETATM | 29 | C | 0 | -5.099 | -0.890 | -1.622 | C |
| HETATM | 30 | C | 0 | -5.972 | -1.052 | -0.540 | C |
| HETATM | 31 | H | 0 | -6.415 | -0.428 | 1.482  | H |
| HETATM | 32 | H | 0 | -5.285 | -1.436 | -2.556 | H |
| HETATM | 33 | C | 0 | 0.813  | 2.425  | -0.352 | C |
| HETATM | 34 | C | 0 | 1.578  | 2.756  | 0.784  | C |
| HETATM | 35 | C | 0 | 1.418  | 2.270  | -1.617 | C |
| HETATM | 36 | C | 0 | 2.962  | 2.892  | 0.638  | C |
| HETATM | 37 | C | 0 | 2.807  | 2.396  | -1.709 | C |
| HETATM | 38 | C | 0 | 3.594  | 2.701  | -0.594 | C |
| HETATM | 39 | H | 0 | 3.564  | 3.151  | 1.518  | H |
| HETATM | 40 | H | 0 | 3.285  | 2.261  | -2.689 | H |
| HETATM | 41 | C | 0 | -4.413 | 1.317  | 2.010  | C |
| HETATM | 42 | H | 0 | -4.956 | 0.863  | 2.855  | H |
| HETATM | 43 | H | 0 | -3.343 | 1.352  | 2.279  | H |
| HETATM | 44 | H | 0 | -4.775 | 2.360  | 1.923  | H |
| HETATM | 45 | C | 0 | -3.080 | 0.143  | -2.719 | C |
| HETATM | 46 | H | 0 | -2.936 | 1.212  | -2.965 | H |
| HETATM | 47 | H | 0 | -2.071 | -0.271 | -2.521 | H |
| HETATM | 48 | H | 0 | -3.477 | -0.358 | -3.617 | H |
| HETATM | 49 | C | 0 | -7.130 | -2.000 | -0.629 | C |
| HETATM | 50 | H | 0 | -6.829 | -3.028 | -0.350 | H |
| HETATM | 51 | H | 0 | -7.952 | -1.714 | 0.049  | H |
| HETATM | 52 | H | 0 | -7.536 | -2.059 | -1.654 | H |
| HETATM | 53 | C | 0 | 0.929  | 2.970  | 2.116  | C |
| HETATM | 54 | H | 0 | 1.660  | 3.325  | 2.861  | H |
| HETATM | 55 | H | 0 | 0.112  | 3.714  | 2.066  | H |
| HETATM | 56 | H | 0 | 0.467  | 2.042  | 2.505  | H |
| HETATM | 57 | C | 0 | 0.613  | 2.047  | -2.862 | C |
| HETATM | 58 | H | 0 | 0.432  | 3.002  | -3.394 | H |
| HETATM | 59 | H | 0 | 1.148  | 1.383  | -3.562 | H |
| HETATM | 60 | H | 0 | -0.361 | 1.575  | -2.662 | H |
| HETATM | 61 | C | 0 | 5.082  | 2.813  | -0.722 | C |
| HETATM | 62 | H | 0 | 5.550  | 1.816  | -0.833 | H |
| HETATM | 63 | H | 0 | 5.378  | 3.398  | -1.612 | H |
| HETATM | 64 | H | 0 | 5.539  | 3.288  | 0.163  | H |
| HETATM | 65 | C | 0 | 5.090  | -3.082 | -1.747 | C |
| HETATM | 66 | H | 0 | 5.436  | -3.218 | -2.787 | H |
| HETATM | 67 | H | 0 | 5.886  | -2.545 | -1.202 | H |
| HETATM | 68 | H | 0 | 4.984  | -4.082 | -1.294 | H |
| HETATM | 69 | C | 0 | 3.823  | -0.954 | -2.357 | C |
| HETATM | 70 | H | 0 | 4.689  | -0.349 | -2.036 | H |
| HETATM | 71 | H | 0 | 3.889  | -1.058 | -3.455 | H |
| HETATM | 72 | H | 0 | 2.897  | -0.402 | -2.128 | H |
| HETATM | 73 | H | 0 | -3.334 | 3.418  | 0.453  | H |
| HETATM | 74 | H | 0 | -1.195 | 4.392  | -0.010 | H |
| HETATM | 75 | C | 0 | 0.588  | -3.144 | 0.842  | C |
| HETATM | 76 | C | 0 | -2.008 | -1.477 | 0.240  | C |
| HETATM | 77 | H | 0 | -2.184 | -2.133 | -0.642 | H |
| HETATM | 78 | H | 0 | -2.769 | -1.544 | 1.046  | H |
| HETATM | 79 | H | 0 | 0.552  | -1.980 | 2.482  | H |
| HETATM | 80 | F | 0 | -0.462 | -3.792 | 1.318  | F |
| HETATM | 81 | F | 0 | 0.963  | -3.710 | -0.262 | F |

END

### sc3a.pdb

|        |                                   |    |   |       |       |       |    |
|--------|-----------------------------------|----|---|-------|-------|-------|----|
| TITLE  | sc3a.pdb                          |    |   |       |       |       |    |
| REMARK | 1 File created by GaussView 5.0.8 |    |   |       |       |       |    |
| HETATM | 1                                 | Ru | 0 | 0.073 | 0.277 | 0.091 | Ru |

|        |    |    |   |        |        |        |    |
|--------|----|----|---|--------|--------|--------|----|
| HETATM | 2  | C  | 0 | 1.104  | -3.893 | 0.274  | C  |
| HETATM | 3  | C  | 0 | -0.413 | -3.914 | 0.406  | C  |
| HETATM | 4  | H  | 0 | 1.622  | -4.331 | 1.148  | H  |
| HETATM | 5  | H  | 0 | -0.759 | -4.312 | 1.380  | H  |
| HETATM | 6  | C  | 0 | 0.303  | -1.669 | 0.151  | C  |
| HETATM | 7  | N  | 0 | -0.773 | -2.506 | 0.281  | N  |
| HETATM | 8  | N  | 0 | 1.410  | -2.467 | 0.162  | N  |
| HETATM | 9  | Cl | 0 | -0.263 | 0.461  | 2.435  | Cl |
| HETATM | 10 | Cl | 0 | -0.723 | 0.391  | -2.150 | Cl |
| HETATM | 11 | C  | 0 | 1.804  | 0.881  | -0.108 | C  |
| HETATM | 12 | H  | 0 | 2.689  | 0.232  | -0.199 | H  |
| HETATM | 13 | C  | 0 | 2.092  | 2.293  | -0.167 | C  |
| HETATM | 14 | C  | 0 | 1.034  | 3.228  | -0.027 | C  |
| HETATM | 15 | C  | 0 | 3.405  | 2.770  | -0.351 | C  |
| HETATM | 16 | C  | 0 | 1.297  | 4.598  | -0.068 | C  |
| HETATM | 17 | C  | 0 | 3.666  | 4.135  | -0.391 | C  |
| HETATM | 18 | H  | 0 | 4.215  | 2.037  | -0.460 | H  |
| HETATM | 19 | C  | 0 | 2.610  | 5.040  | -0.248 | C  |
| HETATM | 20 | H  | 0 | 0.493  | 5.329  | 0.029  | H  |
| HETATM | 21 | H  | 0 | 4.689  | 4.500  | -0.532 | H  |
| HETATM | 22 | H  | 0 | 2.805  | 6.118  | -0.279 | H  |
| HETATM | 23 | O  | 0 | -0.177 | 2.640  | 0.115  | O  |
| HETATM | 24 | C  | 0 | -1.380 | 3.320  | 0.584  | C  |
| HETATM | 25 | H  | 0 | -2.047 | 2.454  | 0.734  | H  |
| HETATM | 26 | C  | 0 | -2.150 | -2.143 | 0.183  | C  |
| HETATM | 27 | C  | 0 | -2.777 | -2.182 | -1.081 | C  |
| HETATM | 28 | C  | 0 | -2.901 | -1.903 | 1.353  | C  |
| HETATM | 29 | C  | 0 | -4.139 | -1.879 | -1.161 | C  |
| HETATM | 30 | C  | 0 | -4.259 | -1.588 | 1.221  | C  |
| HETATM | 31 | C  | 0 | -4.892 | -1.559 | -0.025 | C  |
| HETATM | 32 | H  | 0 | -4.626 | -1.884 | -2.145 | H  |
| HETATM | 33 | H  | 0 | -4.842 | -1.378 | 2.128  | H  |
| HETATM | 34 | C  | 0 | 2.766  | -2.073 | -0.000 | C  |
| HETATM | 35 | C  | 0 | 3.295  | -1.950 | -1.297 | C  |
| HETATM | 36 | C  | 0 | 3.551  | -1.814 | 1.137  | C  |
| HETATM | 37 | C  | 0 | 4.635  | -1.574 | -1.439 | C  |
| HETATM | 38 | C  | 0 | 4.887  | -1.438 | 0.954  | C  |
| HETATM | 39 | C  | 0 | 5.443  | -1.313 | -0.325 | C  |
| HETATM | 40 | H  | 0 | 5.055  | -1.472 | -2.448 | H  |
| HETATM | 41 | H  | 0 | 5.505  | -1.227 | 1.836  | H  |
| HETATM | 42 | C  | 0 | -2.044 | -2.620 | -2.313 | C  |
| HETATM | 43 | H  | 0 | -2.401 | -2.077 | -3.203 | H  |
| HETATM | 44 | H  | 0 | -0.958 | -2.451 | -2.248 | H  |
| HETATM | 45 | H  | 0 | -2.213 | -3.700 | -2.503 | H  |
| HETATM | 46 | C  | 0 | -2.321 | -2.094 | 2.722  | C  |
| HETATM | 47 | H  | 0 | -2.650 | -1.301 | 3.414  | H  |
| HETATM | 48 | H  | 0 | -2.665 | -3.057 | 3.148  | H  |
| HETATM | 49 | H  | 0 | -1.222 | -2.087 | 2.725  | H  |
| HETATM | 50 | C  | 0 | -6.335 | -1.176 | -0.142 | C  |
| HETATM | 51 | H  | 0 | -6.452 | -0.076 | -0.133 | H  |
| HETATM | 52 | H  | 0 | -6.786 | -1.541 | -1.080 | H  |
| HETATM | 53 | H  | 0 | -6.934 | -1.562 | 0.701  | H  |
| HETATM | 54 | C  | 0 | 2.412  | -2.138 | -2.492 | C  |
| HETATM | 55 | H  | 0 | 2.984  | -2.063 | -3.432 | H  |
| HETATM | 56 | H  | 0 | 1.899  | -3.118 | -2.491 | H  |
| HETATM | 57 | H  | 0 | 1.613  | -1.371 | -2.522 | H  |
| HETATM | 58 | C  | 0 | 2.942  | -1.871 | 2.503  | C  |
| HETATM | 59 | H  | 0 | 2.472  | -2.849 | 2.716  | H  |
| HETATM | 60 | H  | 0 | 3.696  | -1.688 | 3.287  | H  |
| HETATM | 61 | H  | 0 | 2.142  | -1.115 | 2.617  | H  |
| HETATM | 62 | C  | 0 | 6.866  | -0.872 | -0.500 | C  |
| HETATM | 63 | H  | 0 | 7.503  | -1.187 | 0.344  | H  |

|        |    |   |   |        |        |        |   |
|--------|----|---|---|--------|--------|--------|---|
| HETATM | 64 | H | 0 | 7.310  | -1.266 | -1.430 | H |
| HETATM | 65 | H | 0 | 6.941  | 0.231  | -0.556 | H |
| HETATM | 66 | C | 0 | -1.976 | 4.203  | -0.492 | C |
| HETATM | 67 | H | 0 | -3.022 | 4.436  | -0.229 | H |
| HETATM | 68 | H | 0 | -1.447 | 5.164  | -0.614 | H |
| HETATM | 69 | H | 0 | -1.985 | 3.681  | -1.463 | H |
| HETATM | 70 | C | 0 | -1.175 | 3.980  | 1.930  | C |
| HETATM | 71 | H | 0 | -0.542 | 4.882  | 1.886  | H |
| HETATM | 72 | H | 0 | -2.158 | 4.288  | 2.326  | H |
| HETATM | 73 | H | 0 | -0.730 | 3.266  | 2.643  | H |
| HETATM | 74 | H | 0 | -0.908 | -4.509 | -0.385 | H |
| HETATM | 75 | H | 0 | 1.469  | -4.434 | -0.620 | H |
| HETATM | 76 | C | 0 | -4.342 | 1.725  | -2.102 | C |
| HETATM | 77 | H | 0 | -5.226 | 2.346  | -2.290 | H |
| HETATM | 78 | H | 0 | -3.749 | 1.362  | -2.946 | H |
| HETATM | 79 | C | 0 | -3.954 | 1.408  | -0.872 | C |
| HETATM | 80 | H | 0 | -3.080 | 0.791  | -0.624 | H |
| HETATM | 81 | F | 0 | -4.610 | 1.827  | 0.222  | F |

END

### sc3d.pdb

|        |          |    |   |        |        |        |    |
|--------|----------|----|---|--------|--------|--------|----|
| TITLE  | sc3d.pdb |    |   |        |        |        |    |
| HETATM | 1        | Ru | 0 | -0.591 | 0.344  | -0.578 | Ru |
| HETATM | 2        | C  | 0 | -1.081 | -3.577 | 1.322  | C  |
| HETATM | 3        | C  | 0 | -2.465 | -2.944 | 1.467  | C  |
| HETATM | 4        | H  | 0 | -0.637 | -3.882 | 2.286  | H  |
| HETATM | 5        | H  | 0 | -2.733 | -2.727 | 2.520  | H  |
| HETATM | 6        | C  | 0 | -1.046 | -1.454 | 0.348  | C  |
| HETATM | 7        | N  | 0 | -2.322 | -1.696 | 0.717  | N  |
| HETATM | 8        | N  | 0 | -0.289 | -2.501 | 0.713  | N  |
| HETATM | 9        | Cl | 0 | 0.517  | 0.726  | 1.583  | Cl |
| HETATM | 10       | Cl | 0 | -1.747 | -0.380 | -2.614 | Cl |
| HETATM | 11       | C  | 0 | 1.039  | 0.478  | -1.507 | C  |
| HETATM | 12       | H  | 0 | 0.923  | -0.023 | -2.495 | H  |
| HETATM | 13       | C  | 0 | 2.415  | 0.861  | -1.264 | C  |
| HETATM | 14       | C  | 0 | 2.892  | 1.920  | -0.428 | C  |
| HETATM | 15       | C  | 0 | 3.369  | 0.066  | -1.939 | C  |
| HETATM | 16       | C  | 0 | 4.275  | 2.041  | -0.214 | C  |
| HETATM | 17       | C  | 0 | 4.733  | 0.196  | -1.719 | C  |
| HETATM | 18       | H  | 0 | 2.997  | -0.699 | -2.632 | H  |
| HETATM | 19       | C  | 0 | 5.178  | 1.179  | -0.834 | C  |
| HETATM | 20       | H  | 0 | 4.663  | 2.838  | 0.422  | H  |
| HETATM | 21       | H  | 0 | 5.443  | -0.462 | -2.233 | H  |
| HETATM | 22       | H  | 0 | 6.250  | 1.307  | -0.644 | H  |
| HETATM | 23       | O  | 0 | 1.977  | 2.788  | 0.001  | O  |
| HETATM | 24       | C  | 0 | 2.200  | 3.835  | 0.969  | C  |
| HETATM | 25       | H  | 0 | 1.158  | 4.126  | 1.185  | H  |
| HETATM | 26       | C  | 0 | -3.374 | -0.745 | 0.539  | C  |
| HETATM | 27       | C  | 0 | -4.307 | -0.940 | -0.506 | C  |
| HETATM | 28       | C  | 0 | -3.478 | 0.363  | 1.403  | C  |
| HETATM | 29       | C  | 0 | -5.281 | 0.034  | -0.720 | C  |
| HETATM | 30       | C  | 0 | -4.469 | 1.322  | 1.141  | C  |
| HETATM | 31       | C  | 0 | -5.363 | 1.184  | 0.079  | C  |
| HETATM | 32       | H  | 0 | -5.992 | -0.102 | -1.545 | H  |
| HETATM | 33       | H  | 0 | -4.544 | 2.194  | 1.805  | H  |
| HETATM | 34       | C  | 0 | 1.125  | -2.597 | 0.554  | C  |
| HETATM | 35       | C  | 0 | 1.657  | -2.919 | -0.707 | C  |
| HETATM | 36       | C  | 0 | 1.961  | -2.396 | 1.669  | C  |
| HETATM | 37       | C  | 0 | 3.047  | -3.014 | -0.840 | C  |
| HETATM | 38       | C  | 0 | 3.344  | -2.478 | 1.485  | C  |

|        |    |   |   |        |        |        |   |
|--------|----|---|---|--------|--------|--------|---|
| HETATM | 39 | C | 0 | 3.904  | -2.783 | 0.240  | C |
| HETATM | 40 | H | 0 | 3.471  | -3.266 | -1.822 | H |
| HETATM | 41 | H | 0 | 4.003  | -2.299 | 2.345  | H |
| HETATM | 42 | C | 0 | -4.277 | -2.179 | -1.347 | C |
| HETATM | 43 | H | 0 | -4.747 | -2.002 | -2.329 | H |
| HETATM | 44 | H | 0 | -3.248 | -2.525 | -1.535 | H |
| HETATM | 45 | H | 0 | -4.836 | -3.005 | -0.863 | H |
| HETATM | 46 | C | 0 | -2.626 | 0.534  | 2.623  | C |
| HETATM | 47 | H | 0 | -1.981 | -0.333 | 2.830  | H |
| HETATM | 48 | H | 0 | -1.946 | 1.398  | 2.531  | H |
| HETATM | 49 | H | 0 | -3.266 | 0.712  | 3.507  | H |
| HETATM | 50 | C | 0 | -6.395 | 2.233  | -0.207 | C |
| HETATM | 51 | H | 0 | -6.149 | 2.798  | -1.126 | H |
| HETATM | 52 | H | 0 | -7.394 | 1.792  | -0.374 | H |
| HETATM | 53 | H | 0 | -6.479 | 2.965  | 0.613  | H |
| HETATM | 54 | C | 0 | 0.754  | -3.173 | -1.876 | C |
| HETATM | 55 | H | 0 | 1.332  | -3.452 | -2.773 | H |
| HETATM | 56 | H | 0 | 0.043  | -3.997 | -1.674 | H |
| HETATM | 57 | H | 0 | 0.129  | -2.297 | -2.138 | H |
| HETATM | 58 | C | 0 | 1.407  | -2.144 | 3.038  | C |
| HETATM | 59 | H | 0 | 1.383  | -3.076 | 3.637  | H |
| HETATM | 60 | H | 0 | 2.033  | -1.423 | 3.590  | H |
| HETATM | 61 | H | 0 | 0.390  | -1.721 | 3.008  | H |
| HETATM | 62 | C | 0 | 5.392  | -2.844 | 0.075  | C |
| HETATM | 63 | H | 0 | 5.846  | -1.840 | 0.174  | H |
| HETATM | 64 | H | 0 | 5.868  | -3.480 | 0.844  | H |
| HETATM | 65 | H | 0 | 5.683  | -3.237 | -0.914 | H |
| HETATM | 66 | C | 0 | 2.899  | 5.027  | 0.341  | C |
| HETATM | 67 | H | 0 | 2.865  | 5.885  | 1.037  | H |
| HETATM | 68 | H | 0 | 3.960  | 4.836  | 0.106  | H |
| HETATM | 69 | H | 0 | 2.394  | 5.333  | -0.591 | H |
| HETATM | 70 | C | 0 | 2.806  | 3.358  | 2.276  | C |
| HETATM | 71 | H | 0 | 3.901  | 3.236  | 2.249  | H |
| HETATM | 72 | H | 0 | 2.583  | 4.103  | 3.060  | H |
| HETATM | 73 | H | 0 | 2.346  | 2.402  | 2.577  | H |
| HETATM | 74 | H | 0 | -3.273 | -3.564 | 1.040  | H |
| HETATM | 75 | H | 0 | -1.079 | -4.464 | 0.660  | H |
| HETATM | 76 | C | 0 | -0.437 | 2.318  | -1.747 | C |
| HETATM | 77 | H | 0 | 0.458  | 2.943  | -1.687 | H |
| HETATM | 78 | H | 0 | -0.821 | 2.043  | -2.736 | H |
| HETATM | 79 | C | 0 | -1.322 | 2.322  | -0.657 | C |
| HETATM | 80 | F | 0 | -1.123 | 3.154  | 0.386  | F |
| HETATM | 81 | H | 0 | -2.396 | 2.104  | -0.795 | H |

END

### sc3I.pdb

|        |          |    |   |        |        |        |    |
|--------|----------|----|---|--------|--------|--------|----|
| TITLE  | sc3I.pdb |    |   |        |        |        |    |
| HETATM | 1        | Ru | 0 | 0.511  | -0.487 | -0.388 | Ru |
| HETATM | 2        | C  | 0 | 1.300  | 3.477  | 1.074  | C  |
| HETATM | 3        | C  | 0 | 2.702  | 2.874  | 1.168  | C  |
| HETATM | 4        | H  | 0 | 0.926  | 3.864  | 2.039  | H  |
| HETATM | 5        | H  | 0 | 3.065  | 2.780  | 2.210  | H  |
| HETATM | 6        | C  | 0 | 1.235  | 1.266  | 0.328  | C  |
| HETATM | 7        | N  | 0 | 2.528  | 1.542  | 0.579  | N  |
| HETATM | 8        | N  | 0 | 0.485  | 2.340  | 0.636  | N  |
| HETATM | 9        | Cl | 0 | -0.551 | -0.920 | 1.734  | Cl |
| HETATM | 10       | Cl | 0 | 1.739  | 0.067  | -2.462 | Cl |
| HETATM | 11       | C  | 0 | -0.891 | -1.195 | -1.705 | C  |
| HETATM | 12       | H  | 0 | -0.544 | -0.876 | -2.700 | H  |
| HETATM | 13       | C  | 0 | -2.345 | -1.010 | -1.607 | C  |

|        |    |   |   |        |        |        |   |
|--------|----|---|---|--------|--------|--------|---|
| HETATM | 14 | C | 0 | -3.237 | -1.622 | -0.680 | C |
| HETATM | 15 | C | 0 | -2.901 | -0.154 | -2.583 | C |
| HETATM | 16 | C | 0 | -4.613 | -1.349 | -0.769 | C |
| HETATM | 17 | C | 0 | -4.259 | 0.125  | -2.650 | C |
| HETATM | 18 | H | 0 | -2.215 | 0.307  | -3.305 | H |
| HETATM | 19 | C | 0 | -5.118 | -0.480 | -1.732 | C |
| HETATM | 20 | H | 0 | -5.307 | -1.851 | -0.092 | H |
| HETATM | 21 | H | 0 | -4.648 | 0.804  | -3.418 | H |
| HETATM | 22 | H | 0 | -6.197 | -0.292 | -1.772 | H |
| HETATM | 23 | O | 0 | -2.713 | -2.496 | 0.188  | O |
| HETATM | 24 | C | 0 | -3.291 | -2.815 | 1.475  | C |
| HETATM | 25 | H | 0 | -2.389 | -3.130 | 2.028  | H |
| HETATM | 26 | C | 0 | 3.611  | 0.623  | 0.425  | C |
| HETATM | 27 | C | 0 | 4.514  | 0.792  | -0.643 | C |
| HETATM | 28 | C | 0 | 3.772  | -0.419 | 1.357  | C |
| HETATM | 29 | C | 0 | 5.540  | -0.144 | -0.798 | C |
| HETATM | 30 | C | 0 | 4.811  | -1.336 | 1.159  | C |
| HETATM | 31 | C | 0 | 5.692  | -1.223 | 0.081  | C |
| HETATM | 32 | H | 0 | 6.233  | -0.032 | -1.642 | H |
| HETATM | 33 | H | 0 | 4.934  | -2.156 | 1.878  | H |
| HETATM | 34 | C | 0 | -0.940 | 2.395  | 0.551  | C |
| HETATM | 35 | C | 0 | -1.551 | 2.596  | -0.699 | C |
| HETATM | 36 | C | 0 | -1.706 | 2.271  | 1.727  | C |
| HETATM | 37 | C | 0 | -2.948 | 2.647  | -0.758 | C |
| HETATM | 38 | C | 0 | -3.098 | 2.308  | 1.618  | C |
| HETATM | 39 | C | 0 | -3.736 | 2.488  | 0.385  | C |
| HETATM | 40 | H | 0 | -3.431 | 2.804  | -1.730 | H |
| HETATM | 41 | H | 0 | -3.702 | 2.181  | 2.527  | H |
| HETATM | 42 | C | 0 | 4.400  | 1.950  | -1.587 | C |
| HETATM | 43 | H | 0 | 4.765  | 1.678  | -2.591 | H |
| HETATM | 44 | H | 0 | 3.356  | 2.283  | -1.704 | H |
| HETATM | 45 | H | 0 | 5.006  | 2.814  | -1.246 | H |
| HETATM | 46 | C | 0 | 2.867  | -0.564 | 2.541  | C |
| HETATM | 47 | H | 0 | 2.531  | 0.410  | 2.939  | H |
| HETATM | 48 | H | 0 | 1.945  | -1.122 | 2.298  | H |
| HETATM | 49 | H | 0 | 3.373  | -1.108 | 3.356  | H |
| HETATM | 50 | C | 0 | 6.769  | -2.241 | -0.146 | C |
| HETATM | 51 | H | 0 | 6.464  | -2.981 | -0.910 | H |
| HETATM | 52 | H | 0 | 7.703  | -1.781 | -0.513 | H |
| HETATM | 53 | H | 0 | 7.003  | -2.807 | 0.772  | H |
| HETATM | 54 | C | 0 | -0.731 | 2.751  | -1.944 | C |
| HETATM | 55 | H | 0 | -1.358 | 3.070  | -2.794 | H |
| HETATM | 56 | H | 0 | 0.076  | 3.498  | -1.825 | H |
| HETATM | 57 | H | 0 | -0.219 | 1.813  | -2.238 | H |
| HETATM | 58 | C | 0 | -1.062 | 2.124  | 3.072  | C |
| HETATM | 59 | H | 0 | -0.924 | 3.107  | 3.567  | H |
| HETATM | 60 | H | 0 | -1.687 | 1.512  | 3.743  | H |
| HETATM | 61 | H | 0 | -0.080 | 1.628  | 3.009  | H |
| HETATM | 62 | C | 0 | -5.233 | 2.507  | 0.305  | C |
| HETATM | 63 | H | 0 | -5.665 | 1.560  | 0.680  | H |
| HETATM | 64 | H | 0 | -5.668 | 3.314  | 0.923  | H |
| HETATM | 65 | H | 0 | -5.590 | 2.644  | -0.729 | H |
| HETATM | 66 | C | 0 | -4.228 | -4.003 | 1.367  | C |
| HETATM | 67 | H | 0 | -4.504 | -4.355 | 2.377  | H |
| HETATM | 68 | H | 0 | -5.165 | -3.765 | 0.833  | H |
| HETATM | 69 | H | 0 | -3.742 | -4.842 | 0.841  | H |
| HETATM | 70 | C | 0 | -3.870 | -1.621 | 2.212  | C |
| HETATM | 71 | H | 0 | -4.899 | -1.361 | 1.911  | H |
| HETATM | 72 | H | 0 | -3.897 | -1.854 | 3.292  | H |
| HETATM | 73 | H | 0 | -3.220 | -0.739 | 2.081  | H |
| HETATM | 74 | H | 0 | 3.459  | 3.445  | 0.603  | H |
| HETATM | 75 | H | 0 | 1.230  | 4.299  | 0.336  | H |

|        |    |   |   |        |        |        |   |
|--------|----|---|---|--------|--------|--------|---|
| HETATM | 76 | C | 0 | -0.116 | -2.463 | -1.262 | C |
| HETATM | 77 | H | 0 | -0.711 | -3.109 | -0.604 | H |
| HETATM | 78 | H | 0 | 0.148  | -2.958 | -2.213 | H |
| HETATM | 79 | C | 0 | 1.307  | -2.245 | -0.591 | C |
| HETATM | 80 | F | 0 | 1.496  | -3.055 | 0.480  | F |
| HETATM | 81 | H | 0 | 2.161  | -2.357 | -1.281 | H |

END

### sc3e.pdb

| TITLE  | sc3e.pdb |    |   |        |        |        |    |
|--------|----------|----|---|--------|--------|--------|----|
| HETATM | 1        | Ru | 0 | -0.497 | -0.625 | 0.355  | Ru |
| HETATM | 2        | Cl | 0 | -1.604 | -0.155 | 2.505  | Cl |
| HETATM | 3        | Cl | 0 | 0.549  | -0.858 | -1.828 | Cl |
| HETATM | 4        | C  | 0 | -1.190 | 1.242  | -0.222 | C  |
| HETATM | 5        | N  | 0 | -2.473 | 1.583  | -0.442 | N  |
| HETATM | 6        | C  | 0 | -2.619 | 2.978  | -0.875 | C  |
| HETATM | 7        | C  | 0 | -1.202 | 3.528  | -0.733 | C  |
| HETATM | 8        | N  | 0 | -0.421 | 2.330  | -0.411 | N  |
| HETATM | 9        | C  | 0 | -3.598 | 0.706  | -0.349 | C  |
| HETATM | 10       | C  | 0 | -4.459 | 0.795  | 0.759  | C  |
| HETATM | 11       | C  | 0 | -5.531 | -0.101 | 0.838  | C  |
| HETATM | 12       | C  | 0 | -5.765 | -1.059 | -0.154 | C  |
| HETATM | 13       | C  | 0 | -4.917 | -1.090 | -1.267 | C  |
| HETATM | 14       | C  | 0 | -3.839 | -0.208 | -1.394 | C  |
| HETATM | 15       | C  | 0 | -4.268 | 1.832  | 1.823  | C  |
| HETATM | 16       | C  | 0 | -6.891 | -2.039 | -0.018 | C  |
| HETATM | 17       | C  | 0 | -2.972 | -0.229 | -2.614 | C  |
| HETATM | 18       | C  | 0 | 1.009  | 2.347  | -0.418 | C  |
| HETATM | 19       | C  | 0 | 1.687  | 2.321  | -1.653 | C  |
| HETATM | 20       | C  | 0 | 3.083  | 2.348  | -1.641 | C  |
| HETATM | 21       | C  | 0 | 3.809  | 2.414  | -0.446 | C  |
| HETATM | 22       | C  | 0 | 3.106  | 2.465  | 0.760  | C  |
| HETATM | 23       | C  | 0 | 1.708  | 2.431  | 0.799  | C  |
| HETATM | 24       | C  | 0 | 0.950  | 2.278  | -2.957 | C  |
| HETATM | 25       | C  | 0 | 5.307  | 2.423  | -0.468 | C  |
| HETATM | 26       | C  | 0 | 0.975  | 2.507  | 2.104  | C  |
| HETATM | 27       | H  | 0 | -3.355 | 3.501  | -0.239 | H  |
| HETATM | 28       | H  | 0 | -2.998 | 3.015  | -1.915 | H  |
| HETATM | 29       | H  | 0 | -1.103 | 4.272  | 0.081  | H  |
| HETATM | 30       | H  | 0 | -0.821 | 3.996  | -1.657 | H  |
| HETATM | 31       | H  | 0 | -6.197 | -0.052 | 1.710  | H  |
| HETATM | 32       | H  | 0 | -5.103 | -1.816 | -2.070 | H  |
| HETATM | 33       | H  | 0 | -3.217 | 2.152  | 1.908  | H  |
| HETATM | 34       | H  | 0 | -4.567 | 1.447  | 2.811  | H  |
| HETATM | 35       | H  | 0 | -4.890 | 2.728  | 1.626  | H  |
| HETATM | 36       | H  | 0 | -7.754 | -1.605 | 0.516  | H  |
| HETATM | 37       | H  | 0 | -7.243 | -2.401 | -0.999 | H  |
| HETATM | 38       | H  | 0 | -6.581 | -2.931 | 0.559  | H  |
| HETATM | 39       | H  | 0 | -1.925 | -0.510 | -2.391 | H  |
| HETATM | 40       | H  | 0 | -2.927 | 0.763  | -3.102 | H  |
| HETATM | 41       | H  | 0 | -3.353 | -0.948 | -3.358 | H  |
| HETATM | 42       | H  | 0 | 3.622  | 2.302  | -2.598 | H  |
| HETATM | 43       | H  | 0 | 3.659  | 2.538  | 1.704  | H  |
| HETATM | 44       | H  | 0 | 1.495  | 1.665  | -3.695 | H  |
| HETATM | 45       | H  | 0 | -0.054 | 1.836  | -2.858 | H  |
| HETATM | 46       | H  | 0 | 0.842  | 3.290  | -3.397 | H  |
| HETATM | 47       | H  | 0 | 5.710  | 1.473  | -0.867 | H  |
| HETATM | 48       | H  | 0 | 5.706  | 3.225  | -1.116 | H  |
| HETATM | 49       | H  | 0 | 5.733  | 2.561  | 0.541  | H  |
| HETATM | 50       | H  | 0 | 1.678  | 2.603  | 2.948  | H  |

|        |    |   |   |        |        |        |   |
|--------|----|---|---|--------|--------|--------|---|
| HETATM | 51 | H | 0 | 0.342  | 1.619  | 2.294  | H |
| HETATM | 52 | H | 0 | 0.288  | 3.374  | 2.139  | H |
| HETATM | 53 | C | 0 | 0.809  | -1.798 | 1.633  | C |
| HETATM | 54 | C | 0 | 2.191  | -1.304 | 1.634  | C |
| HETATM | 55 | C | 0 | 3.205  | -1.627 | 0.688  | C |
| HETATM | 56 | C | 0 | 4.511  | -1.153 | 0.899  | C |
| HETATM | 57 | C | 0 | 4.819  | -0.364 | 2.006  | C |
| HETATM | 58 | C | 0 | 3.833  | -0.031 | 2.934  | C |
| HETATM | 59 | C | 0 | 2.542  | -0.504 | 2.742  | C |
| HETATM | 60 | O | 0 | 2.851  | -2.450 | -0.306 | O |
| HETATM | 61 | C | 0 | 3.551  | -2.578 | -1.562 | C |
| HETATM | 62 | C | 0 | 4.642  | -3.628 | -1.471 | C |
| HETATM | 63 | C | 0 | 4.000  | -1.260 | -2.167 | C |
| HETATM | 64 | H | 0 | 0.358  | -1.713 | 2.631  | H |
| HETATM | 65 | H | 0 | 5.309  | -1.436 | 0.210  | H |
| HETATM | 66 | H | 0 | 5.852  | -0.019 | 2.144  | H |
| HETATM | 67 | H | 0 | 4.072  | 0.587  | 3.807  | H |
| HETATM | 68 | H | 0 | 1.752  | -0.264 | 3.465  | H |
| HETATM | 69 | H | 0 | 5.037  | -3.847 | -2.479 | H |
| HETATM | 70 | H | 0 | 4.251  | -4.570 | -1.051 | H |
| HETATM | 71 | H | 0 | 5.493  | -3.306 | -0.846 | H |
| HETATM | 72 | H | 0 | 2.742  | -2.970 | -2.204 | H |
| HETATM | 73 | H | 0 | 4.119  | -1.395 | -3.257 | H |
| HETATM | 74 | H | 0 | 4.967  | -0.896 | -1.781 | H |
| HETATM | 75 | H | 0 | 3.232  | -0.484 | -2.010 | H |
| HETATM | 76 | C | 0 | 0.143  | -2.748 | 0.783  | C |
| HETATM | 77 | C | 0 | -1.636 | -2.063 | 0.139  | C |
| HETATM | 78 | H | 0 | -0.462 | -3.489 | 1.328  | H |
| HETATM | 79 | H | 0 | 0.632  | -3.123 | -0.123 | H |
| HETATM | 80 | F | 0 | -1.852 | -2.760 | -0.977 | F |
| HETATM | 81 | H | 0 | -2.388 | -2.364 | 0.899  | H |

END

### sc3f.pdb

|        |          |    |   |        |        |        |    |
|--------|----------|----|---|--------|--------|--------|----|
| TITLE  | sc3f.pdb |    |   |        |        |        |    |
| HETATM | 1        | Ru | 0 | -0.486 | -0.740 | 0.419  | Ru |
| HETATM | 2        | Cl | 0 | -1.114 | 0.001  | 2.687  | Cl |
| HETATM | 3        | Cl | 0 | 0.317  | -1.194 | -1.831 | Cl |
| HETATM | 4        | C  | 0 | -1.187 | 1.090  | -0.183 | C  |
| HETATM | 5        | N  | 0 | -2.463 | 1.519  | -0.331 | N  |
| HETATM | 6        | C  | 0 | -2.560 | 2.953  | -0.612 | C  |
| HETATM | 7        | C  | 0 | -1.104 | 3.365  | -0.773 | C  |
| HETATM | 8        | N  | 0 | -0.377 | 2.155  | -0.382 | N  |
| HETATM | 9        | C  | 0 | -3.648 | 0.726  | -0.312 | C  |
| HETATM | 10       | C  | 0 | -4.507 | 0.770  | 0.803  | C  |
| HETATM | 11       | C  | 0 | -5.655 | -0.031 | 0.783  | C  |
| HETATM | 12       | C  | 0 | -5.970 | -0.844 | -0.311 | C  |
| HETATM | 13       | C  | 0 | -5.119 | -0.829 | -1.423 | C  |
| HETATM | 14       | C  | 0 | -3.961 | -0.047 | -1.449 | C  |
| HETATM | 15       | C  | 0 | -4.214 | 1.646  | 1.981  | C  |
| HETATM | 16       | C  | 0 | -7.183 | -1.724 | -0.291 | C  |
| HETATM | 17       | C  | 0 | -3.064 | -0.039 | -2.647 | C  |
| HETATM | 18       | C  | 0 | 1.053  | 2.159  | -0.478 | C  |
| HETATM | 19       | C  | 0 | 1.656  | 2.026  | -1.743 | C  |
| HETATM | 20       | C  | 0 | 3.050  | 2.124  | -1.825 | C  |
| HETATM | 21       | C  | 0 | 3.838  | 2.389  | -0.703 | C  |
| HETATM | 22       | C  | 0 | 3.204  | 2.576  | 0.530  | C  |
| HETATM | 23       | C  | 0 | 1.817  | 2.465  | 0.668  | C  |
| HETATM | 24       | C  | 0 | 0.857  | 1.848  | -2.998 | C  |
| HETATM | 25       | C  | 0 | 5.332  | 2.441  | -0.806 | C  |

|        |    |   |   |        |        |        |   |
|--------|----|---|---|--------|--------|--------|---|
| HETATM | 26 | C | 0 | 1.163  | 2.708  | 1.992  | C |
| HETATM | 27 | H | 0 | -3.063 | 3.469  | 0.228  | H |
| HETATM | 28 | H | 0 | -3.169 | 3.125  | -1.517 | H |
| HETATM | 29 | H | 0 | -0.813 | 4.214  | -0.130 | H |
| HETATM | 30 | H | 0 | -0.844 | 3.638  | -1.815 | H |
| HETATM | 31 | H | 0 | -6.321 | -0.020 | 1.656  | H |
| HETATM | 32 | H | 0 | -5.363 | -1.443 | -2.300 | H |
| HETATM | 33 | H | 0 | -3.130 | 1.756  | 2.151  | H |
| HETATM | 34 | H | 0 | -4.651 | 1.230  | 2.904  | H |
| HETATM | 35 | H | 0 | -4.649 | 2.657  | 1.852  | H |
| HETATM | 36 | H | 0 | -6.928 | -2.753 | 0.027  | H |
| HETATM | 37 | H | 0 | -7.951 | -1.355 | 0.410  | H |
| HETATM | 38 | H | 0 | -7.645 | -1.812 | -1.290 | H |
| HETATM | 39 | H | 0 | -2.083 | -0.512 | -2.439 | H |
| HETATM | 40 | H | 0 | -2.840 | 0.991  | -2.985 | H |
| HETATM | 41 | H | 0 | -3.521 | -0.578 | -3.492 | H |
| HETATM | 42 | H | 0 | 3.530  | 1.996  | -2.805 | H |
| HETATM | 43 | H | 0 | 3.804  | 2.820  | 1.415  | H |
| HETATM | 44 | H | 0 | 1.359  | 1.152  | -3.690 | H |
| HETATM | 45 | H | 0 | -0.147 | 1.436  | -2.811 | H |
| HETATM | 46 | H | 0 | 0.745  | 2.811  | -3.536 | H |
| HETATM | 47 | H | 0 | 5.777  | 1.449  | -0.591 | H |
| HETATM | 48 | H | 0 | 5.670  | 2.730  | -1.817 | H |
| HETATM | 49 | H | 0 | 5.773  | 3.147  | -0.081 | H |
| HETATM | 50 | H | 0 | 1.908  | 2.984  | 2.757  | H |
| HETATM | 51 | H | 0 | 0.607  | 1.824  | 2.358  | H |
| HETATM | 52 | H | 0 | 0.419  | 3.526  | 1.940  | H |
| HETATM | 53 | C | 0 | 0.992  | -2.144 | 1.708  | C |
| HETATM | 54 | C | 0 | 2.252  | -1.393 | 1.674  | C |
| HETATM | 55 | C | 0 | 3.273  | -1.563 | 0.691  | C |
| HETATM | 56 | C | 0 | 4.494  | -0.889 | 0.855  | C |
| HETATM | 57 | C | 0 | 4.705  | -0.044 | 1.940  | C |
| HETATM | 58 | C | 0 | 3.707  | 0.152  | 2.896  | C |
| HETATM | 59 | C | 0 | 2.501  | -0.523 | 2.756  | C |
| HETATM | 60 | O | 0 | 3.014  | -2.439 | -0.288 | O |
| HETATM | 61 | C | 0 | 3.722  | -2.518 | -1.541 | C |
| HETATM | 62 | C | 0 | 4.996  | -3.331 | -1.418 | C |
| HETATM | 63 | C | 0 | 3.885  | -1.176 | -2.229 | C |
| HETATM | 64 | H | 0 | 0.491  | -2.085 | 2.683  | H |
| HETATM | 65 | H | 0 | 5.303  | -1.045 | 0.138  | H |
| HETATM | 66 | H | 0 | 5.671  | 0.468  | 2.037  | H |
| HETATM | 67 | H | 0 | 3.870  | 0.824  | 3.746  | H |
| HETATM | 68 | H | 0 | 1.702  | -0.391 | 3.496  | H |
| HETATM | 69 | H | 0 | 5.390  | -3.559 | -2.424 | H |
| HETATM | 70 | H | 0 | 4.803  | -4.291 | -0.909 | H |
| HETATM | 71 | H | 0 | 5.794  | -2.808 | -0.864 | H |
| HETATM | 72 | H | 0 | 3.000  | -3.101 | -2.141 | H |
| HETATM | 73 | H | 0 | 4.709  | -0.562 | -1.825 | H |
| HETATM | 74 | H | 0 | 2.946  | -0.603 | -2.151 | H |
| HETATM | 75 | H | 0 | 4.096  | -1.343 | -3.300 | H |
| HETATM | 76 | C | 0 | 0.422  | -2.977 | 0.777  | C |
| HETATM | 77 | C | 0 | -2.063 | -1.616 | 0.339  | C |
| HETATM | 78 | H | 0 | -2.929 | -1.467 | 1.020  | H |
| HETATM | 79 | H | 0 | -0.439 | -3.584 | 1.079  | H |
| HETATM | 80 | F | 0 | -2.349 | -2.620 | -0.489 | F |
| HETATM | 81 | H | 0 | 0.871  | -3.203 | -0.191 | H |

END

### st3a.pdb

TITLE st3a.pdb



|        |    |    |   |        |        |        |    |
|--------|----|----|---|--------|--------|--------|----|
| HETATM | 1  | Ru | 0 | 0.085  | 0.330  | 0.017  | Ru |
| HETATM | 2  | C  | 0 | 0.845  | -3.814 | 0.780  | C  |
| HETATM | 3  | C  | 0 | -0.661 | -3.801 | 0.581  | C  |
| HETATM | 4  | H  | 0 | 1.132  | -3.993 | 1.834  | H  |
| HETATM | 5  | H  | 0 | -1.221 | -4.204 | 1.444  | H  |
| HETATM | 6  | C  | 0 | 0.172  | -1.622 | 0.204  | C  |
| HETATM | 7  | N  | 0 | -0.954 | -2.383 | 0.392  | N  |
| HETATM | 8  | N  | 0 | 1.235  | -2.466 | 0.370  | N  |
| HETATM | 9  | Cl | 0 | 0.000  | 0.599  | 2.377  | Cl |
| HETATM | 10 | Cl | 0 | -0.955 | 0.493  | -2.122 | Cl |
| HETATM | 11 | C  | 0 | 1.834  | 0.772  | -0.377 | C  |
| HETATM | 12 | H  | 0 | 2.634  | 0.047  | -0.593 | H  |
| HETATM | 13 | C  | 0 | 2.245  | 2.155  | -0.425 | C  |
| HETATM | 14 | C  | 0 | 1.270  | 3.167  | -0.225 | C  |
| HETATM | 15 | C  | 0 | 3.584  | 2.532  | -0.643 | C  |
| HETATM | 16 | C  | 0 | 1.636  | 4.513  | -0.235 | C  |
| HETATM | 17 | C  | 0 | 3.949  | 3.874  | -0.655 | C  |
| HETATM | 18 | H  | 0 | 4.331  | 1.743  | -0.797 | H  |
| HETATM | 19 | C  | 0 | 2.974  | 4.855  | -0.450 | C  |
| HETATM | 20 | H  | 0 | 0.899  | 5.302  | -0.074 | H  |
| HETATM | 21 | H  | 0 | 4.993  | 4.162  | -0.822 | H  |
| HETATM | 22 | H  | 0 | 3.254  | 5.915  | -0.454 | H  |
| HETATM | 23 | O  | 0 | 0.033  | 2.659  | -0.033 | O  |
| HETATM | 24 | C  | 0 | -1.190 | 3.428  | 0.129  | C  |
| HETATM | 25 | H  | 0 | -1.919 | 2.606  | 0.204  | H  |
| HETATM | 26 | C  | 0 | -2.294 | -2.026 | 0.037  | C  |
| HETATM | 27 | C  | 0 | -2.711 | -2.177 | -1.300 | C  |
| HETATM | 28 | C  | 0 | -3.216 | -1.681 | 1.047  | C  |
| HETATM | 29 | C  | 0 | -4.048 | -1.915 | -1.619 | C  |
| HETATM | 30 | C  | 0 | -4.543 | -1.434 | 0.682  | C  |
| HETATM | 31 | C  | 0 | -4.975 | -1.538 | -0.644 | C  |
| HETATM | 32 | H  | 0 | -4.372 | -2.018 | -2.663 | H  |
| HETATM | 33 | H  | 0 | -5.260 | -1.151 | 1.464  | H  |
| HETATM | 34 | C  | 0 | 2.616  | -2.170 | 0.203  | C  |
| HETATM | 35 | C  | 0 | 3.160  | -2.215 | -1.095 | C  |
| HETATM | 36 | C  | 0 | 3.417  | -1.856 | 1.315  | C  |
| HETATM | 37 | C  | 0 | 4.518  | -1.934 | -1.266 | C  |
| HETATM | 38 | C  | 0 | 4.772  | -1.575 | 1.101  | C  |
| HETATM | 39 | C  | 0 | 5.338  | -1.607 | -0.179 | C  |
| HETATM | 40 | H  | 0 | 4.945  | -1.962 | -2.278 | H  |
| HETATM | 41 | H  | 0 | 5.400  | -1.316 | 1.963  | H  |
| HETATM | 42 | C  | 0 | -1.785 | -2.677 | -2.367 | C  |
| HETATM | 43 | H  | 0 | -2.009 | -2.203 | -3.337 | H  |
| HETATM | 44 | H  | 0 | -0.727 | -2.468 | -2.145 | H  |
| HETATM | 45 | H  | 0 | -1.894 | -3.771 | -2.508 | H  |
| HETATM | 46 | C  | 0 | -2.811 | -1.648 | 2.488  | C  |
| HETATM | 47 | H  | 0 | -3.581 | -1.157 | 3.106  | H  |
| HETATM | 48 | H  | 0 | -2.679 | -2.672 | 2.890  | H  |
| HETATM | 49 | H  | 0 | -1.857 | -1.118 | 2.645  | H  |
| HETATM | 50 | C  | 0 | -6.397 | -1.235 | -1.005 | C  |
| HETATM | 51 | H  | 0 | -6.574 | -0.143 | -1.041 | H  |
| HETATM | 52 | H  | 0 | -6.670 | -1.641 | -1.994 | H  |
| HETATM | 53 | H  | 0 | -7.107 | -1.640 | -0.262 | H  |
| HETATM | 54 | C  | 0 | 2.271  | -2.481 | -2.271 | C  |
| HETATM | 55 | H  | 0 | 2.852  | -2.581 | -3.203 | H  |
| HETATM | 56 | H  | 0 | 1.671  | -3.402 | -2.144 | H  |
| HETATM | 57 | H  | 0 | 1.544  | -1.657 | -2.415 | H  |
| HETATM | 58 | C  | 0 | 2.835  | -1.799 | 2.693  | C  |
| HETATM | 59 | H  | 0 | 2.662  | -2.810 | 3.111  | H  |
| HETATM | 60 | H  | 0 | 3.516  | -1.281 | 3.389  | H  |
| HETATM | 61 | H  | 0 | 1.867  | -1.267 | 2.711  | H  |
| HETATM | 62 | C  | 0 | 6.783  | -1.265 | -0.386 | C  |

|        |    |   |   |        |        |        |   |
|--------|----|---|---|--------|--------|--------|---|
| HETATM | 63 | H | 0 | 7.401  | -1.531 | 0.489  | H |
| HETATM | 64 | H | 0 | 7.206  | -1.773 | -1.270 | H |
| HETATM | 65 | H | 0 | 6.922  | -0.179 | -0.550 | H |
| HETATM | 66 | C | 0 | -1.516 | 4.231  | -1.110 | C |
| HETATM | 67 | H | 0 | -2.545 | 4.620  | -1.024 | H |
| HETATM | 68 | H | 0 | -0.848 | 5.095  | -1.265 | H |
| HETATM | 69 | H | 0 | -1.469 | 3.585  | -2.003 | H |
| HETATM | 70 | C | 0 | -1.215 | 4.180  | 1.442  | C |
| HETATM | 71 | H | 0 | -0.588 | 5.088  | 1.448  | H |
| HETATM | 72 | H | 0 | -2.252 | 4.495  | 1.652  | H |
| HETATM | 73 | H | 0 | -0.890 | 3.520  | 2.264  | H |
| HETATM | 74 | H | 0 | -0.978 | -4.376 | -0.314 | H |
| HETATM | 75 | H | 0 | 1.363  | -4.570 | 0.163  | H |
| HETATM | 76 | C | 0 | -4.338 | 1.796  | -0.627 | C |
| HETATM | 77 | H | 0 | -5.086 | 2.171  | -1.333 | H |
| HETATM | 78 | H | 0 | -3.462 | 1.262  | -1.021 | H |
| HETATM | 79 | C | 0 | -4.527 | 1.994  | 0.674  | C |
| HETATM | 80 | F | 0 | -3.657 | 1.578  | 1.603  | F |
| HETATM | 81 | H | 0 | -5.383 | 2.509  | 1.129  | H |

END

### st3b.pdb

| TITLE  | st3b.pdb |    |   |        |        |        |    |
|--------|----------|----|---|--------|--------|--------|----|
| HETATM | 1        | Ru | 0 | -0.332 | 0.323  | -0.338 | Ru |
| HETATM | 2        | Cl | 0 | -0.851 | -0.244 | -2.620 | Cl |
| HETATM | 3        | Cl | 0 | -0.640 | 1.202  | 1.873  | Cl |
| HETATM | 4        | C  | 0 | -0.618 | -1.484 | 0.334  | C  |
| HETATM | 5        | N  | 0 | -1.867 | -1.900 | 0.703  | N  |
| HETATM | 6        | C  | 0 | -1.904 | -3.282 | 1.164  | C  |
| HETATM | 7        | C  | 0 | -0.430 | -3.634 | 1.284  | C  |
| HETATM | 8        | N  | 0 | 0.234  | -2.515 | 0.613  | N  |
| HETATM | 9        | C  | 0 | -3.089 | -1.214 | 0.421  | C  |
| HETATM | 10       | C  | 0 | -3.698 | -1.377 | -0.842 | C  |
| HETATM | 11       | C  | 0 | -4.877 | -0.675 | -1.108 | C  |
| HETATM | 12       | C  | 0 | -5.480 | 0.140  | -0.145 | C  |
| HETATM | 13       | C  | 0 | -4.915 | 0.193  | 1.132  | C  |
| HETATM | 14       | C  | 0 | -3.734 | -0.488 | 1.443  | C  |
| HETATM | 15       | C  | 0 | -3.187 | -2.365 | -1.847 | C  |
| HETATM | 16       | C  | 0 | -6.694 | 0.951  | -0.479 | C  |
| HETATM | 17       | C  | 0 | -3.247 | -0.508 | 2.861  | C  |
| HETATM | 18       | C  | 0 | 1.649  | -2.577 | 0.471  | C  |
| HETATM | 19       | C  | 0 | 2.492  | -2.038 | 1.459  | C  |
| HETATM | 20       | C  | 0 | 3.877  | -2.164 | 1.292  | C  |
| HETATM | 21       | C  | 0 | 4.428  | -2.805 | 0.179  | C  |
| HETATM | 22       | C  | 0 | 3.563  | -3.334 | -0.789 | C  |
| HETATM | 23       | C  | 0 | 2.175  | -3.225 | -0.663 | C  |
| HETATM | 24       | C  | 0 | 1.932  | -1.280 | 2.621  | C  |
| HETATM | 25       | C  | 0 | 5.914  | -2.879 | -0.004 | C  |
| HETATM | 26       | C  | 0 | 1.258  | -3.688 | -1.753 | C  |
| HETATM | 27       | H  | 0 | -2.438 | -3.915 | 0.426  | H  |
| HETATM | 28       | H  | 0 | -2.451 | -3.357 | 2.121  | H  |
| HETATM | 29       | H  | 0 | -0.165 | -4.591 | 0.798  | H  |
| HETATM | 30       | H  | 0 | -0.088 | -3.696 | 2.336  | H  |
| HETATM | 31       | H  | 0 | -5.340 | -0.776 | -2.099 | H  |
| HETATM | 32       | H  | 0 | -5.407 | 0.782  | 1.918  | H  |
| HETATM | 33       | H  | 0 | -2.110 | -2.568 | -1.746 | H  |
| HETATM | 34       | H  | 0 | -3.349 | -2.011 | -2.877 | H  |
| HETATM | 35       | H  | 0 | -3.729 | -3.327 | -1.743 | H  |
| HETATM | 36       | H  | 0 | -6.406 | 1.946  | -0.871 | H  |
| HETATM | 37       | H  | 0 | -7.313 | 0.472  | -1.258 | H  |

|        |    |   |   |        |        |        |   |
|--------|----|---|---|--------|--------|--------|---|
| HETATM | 38 | H | 0 | -7.331 | 1.131  | 0.404  | H |
| HETATM | 39 | H | 0 | -2.200 | -0.836 | 2.948  | H |
| HETATM | 40 | H | 0 | -3.313 | 0.490  | 3.324  | H |
| HETATM | 41 | H | 0 | -3.876 | -1.188 | 3.470  | H |
| HETATM | 42 | H | 0 | 4.542  | -1.741 | 2.056  | H |
| HETATM | 43 | H | 0 | 3.980  | -3.829 | -1.676 | H |
| HETATM | 44 | H | 0 | 1.686  | -0.240 | 2.332  | H |
| HETATM | 45 | H | 0 | 2.649  | -1.237 | 3.457  | H |
| HETATM | 46 | H | 0 | 0.985  | -1.706 | 2.995  | H |
| HETATM | 47 | H | 0 | 6.291  | -2.001 | -0.566 | H |
| HETATM | 48 | H | 0 | 6.451  | -2.889 | 0.960  | H |
| HETATM | 49 | H | 0 | 6.219  | -3.772 | -0.576 | H |
| HETATM | 50 | H | 0 | 1.813  | -4.191 | -2.561 | H |
| HETATM | 51 | H | 0 | 0.713  | -2.831 | -2.197 | H |
| HETATM | 52 | H | 0 | 0.482  | -4.390 | -1.393 | H |
| HETATM | 53 | C | 0 | 1.477  | 0.177  | -0.695 | C |
| HETATM | 54 | C | 0 | 2.559  | 1.136  | -0.742 | C |
| HETATM | 55 | C | 0 | 2.465  | 2.497  | -0.330 | C |
| HETATM | 56 | C | 0 | 3.608  | 3.309  | -0.363 | C |
| HETATM | 57 | C | 0 | 4.831  | 2.803  | -0.799 | C |
| HETATM | 58 | C | 0 | 4.942  | 1.473  | -1.216 | C |
| HETATM | 59 | C | 0 | 3.818  | 0.662  | -1.188 | C |
| HETATM | 60 | O | 0 | 1.246  | 2.930  | 0.029  | O |
| HETATM | 61 | C | 0 | 1.036  | 3.946  | 1.043  | C |
| HETATM | 62 | C | 0 | 1.030  | 5.344  | 0.457  | C |
| HETATM | 63 | C | 0 | 1.929  | 3.761  | 2.251  | C |
| HETATM | 64 | H | 0 | 1.819  | -0.803 | -1.071 | H |
| HETATM | 65 | H | 0 | 3.540  | 4.359  | -0.069 | H |
| HETATM | 66 | H | 0 | 5.705  | 3.464  | -0.822 | H |
| HETATM | 67 | H | 0 | 5.903  | 1.079  | -1.565 | H |
| HETATM | 68 | H | 0 | 3.885  | -0.388 | -1.503 | H |
| HETATM | 69 | H | 0 | 0.643  | 6.055  | 1.209  | H |
| HETATM | 70 | H | 0 | 2.028  | 5.702  | 0.154  | H |
| HETATM | 71 | H | 0 | 0.366  | 5.403  | -0.423 | H |
| HETATM | 72 | H | 0 | 0.011  | 3.698  | 1.368  | H |
| HETATM | 73 | H | 0 | 2.977  | 4.062  | 2.083  | H |
| HETATM | 74 | H | 0 | 1.911  | 2.707  | 2.577  | H |
| HETATM | 75 | H | 0 | 1.540  | 4.373  | 3.083  | H |
| HETATM | 76 | C | 0 | -1.164 | 3.022  | -2.010 | C |
| HETATM | 77 | C | 0 | -1.871 | 2.873  | -0.891 | C |
| HETATM | 78 | H | 0 | -1.394 | 2.449  | -2.913 | H |
| HETATM | 79 | H | 0 | -0.311 | 3.705  | -2.019 | H |
| HETATM | 80 | F | 0 | -2.917 | 2.040  | -0.813 | F |
| HETATM | 81 | H | 0 | -1.695 | 3.388  | 0.061  | H |

END

### st3c.pdb

|        |          |    |   |        |        |        |    |
|--------|----------|----|---|--------|--------|--------|----|
| TITLE  | st3c.pdb |    |   |        |        |        |    |
| HETATM | 1        | Ru | 0 | -0.517 | 0.338  | -0.628 | Ru |
| HETATM | 2        | C  | 0 | -0.514 | -3.390 | 1.716  | C  |
| HETATM | 3        | C  | 0 | -1.982 | -2.982 | 1.700  | C  |
| HETATM | 4        | H  | 0 | -0.065 | -3.356 | 2.727  | H  |
| HETATM | 5        | H  | 0 | -2.408 | -2.844 | 2.711  | H  |
| HETATM | 6        | C  | 0 | -0.733 | -1.403 | 0.475  | C  |
| HETATM | 7        | N  | 0 | -1.953 | -1.712 | 0.978  | N  |
| HETATM | 8        | N  | 0 | 0.121  | -2.379 | 0.859  | N  |
| HETATM | 9        | Cl | 0 | -0.505 | 1.433  | 1.580  | Cl |
| HETATM | 10       | Cl | 0 | -0.984 | -0.961 | -2.643 | Cl |
| HETATM | 11       | C  | 0 | 1.315  | 0.215  | -0.901 | C  |
| HETATM | 12       | H  | 0 | 1.579  | -0.782 | -1.310 | H  |

|        |    |   |   |        |        |        |   |
|--------|----|---|---|--------|--------|--------|---|
| HETATM | 13 | C | 0 | 2.504  | 1.030  | -0.774 | C |
| HETATM | 14 | C | 0 | 2.587  | 2.390  | -0.332 | C |
| HETATM | 15 | C | 0 | 3.720  | 0.367  | -1.084 | C |
| HETATM | 16 | C | 0 | 3.850  | 2.990  | -0.198 | C |
| HETATM | 17 | C | 0 | 4.960  | 0.969  | -0.941 | C |
| HETATM | 18 | H | 0 | 3.654  | -0.670 | -1.436 | H |
| HETATM | 19 | C | 0 | 5.017  | 2.290  | -0.489 | C |
| HETATM | 20 | H | 0 | 3.922  | 4.034  | 0.113  | H |
| HETATM | 21 | H | 0 | 5.877  | 0.421  | -1.185 | H |
| HETATM | 22 | H | 0 | 5.984  | 2.795  | -0.378 | H |
| HETATM | 23 | O | 0 | 1.439  | 3.042  | -0.130 | O |
| HETATM | 24 | C | 0 | 1.283  | 4.160  | 0.776  | C |
| HETATM | 25 | H | 0 | 0.198  | 4.109  | 0.975  | H |
| HETATM | 26 | C | 0 | -3.151 | -0.999 | 0.664  | C |
| HETATM | 27 | C | 0 | -3.852 | -1.315 | -0.521 | C |
| HETATM | 28 | C | 0 | -3.660 | -0.048 | 1.571  | C |
| HETATM | 29 | C | 0 | -4.965 | -0.541 | -0.861 | C |
| HETATM | 30 | C | 0 | -4.778 | 0.701  | 1.188  | C |
| HETATM | 31 | C | 0 | -5.417 | 0.496  | -0.038 | C |
| HETATM | 32 | H | 0 | -5.495 | -0.762 | -1.797 | H |
| HETATM | 33 | H | 0 | -5.161 | 1.466  | 1.877  | H |
| HETATM | 34 | C | 0 | 1.521  | -2.491 | 0.607  | C |
| HETATM | 35 | C | 0 | 1.951  | -3.301 | -0.463 | C |
| HETATM | 36 | C | 0 | 2.444  | -1.873 | 1.469  | C |
| HETATM | 37 | C | 0 | 3.324  | -3.479 | -0.655 | C |
| HETATM | 38 | C | 0 | 3.810  | -2.078 | 1.241  | C |
| HETATM | 39 | C | 0 | 4.267  | -2.875 | 0.188  | C |
| HETATM | 40 | H | 0 | 3.666  | -4.104 | -1.491 | H |
| HETATM | 41 | H | 0 | 4.536  | -1.591 | 1.905  | H |
| HETATM | 42 | C | 0 | -3.512 | -2.520 | -1.345 | C |
| HETATM | 43 | H | 0 | -3.679 | -2.335 | -2.418 | H |
| HETATM | 44 | H | 0 | -2.465 | -2.841 | -1.240 | H |
| HETATM | 45 | H | 0 | -4.164 | -3.370 | -1.055 | H |
| HETATM | 46 | C | 0 | -3.107 | 0.115  | 2.954  | C |
| HETATM | 47 | H | 0 | -3.015 | 1.178  | 3.229  | H |
| HETATM | 48 | H | 0 | -3.788 | -0.356 | 3.690  | H |
| HETATM | 49 | H | 0 | -2.108 | -0.331 | 3.071  | H |
| HETATM | 50 | C | 0 | -6.552 | 1.373  | -0.470 | C |
| HETATM | 51 | H | 0 | -6.186 | 2.207  | -1.098 | H |
| HETATM | 52 | H | 0 | -7.293 | 0.824  | -1.076 | H |
| HETATM | 53 | H | 0 | -7.077 | 1.826  | 0.389  | H |
| HETATM | 54 | C | 0 | 0.954  | -3.903 | -1.404 | C |
| HETATM | 55 | H | 0 | 1.442  | -4.571 | -2.133 | H |
| HETATM | 56 | H | 0 | 0.176  | -4.488 | -0.879 | H |
| HETATM | 57 | H | 0 | 0.415  | -3.115 | -1.967 | H |
| HETATM | 58 | C | 0 | 1.982  | -0.973 | 2.570  | C |
| HETATM | 59 | H | 0 | 1.149  | -1.406 | 3.154  | H |
| HETATM | 60 | H | 0 | 2.801  | -0.737 | 3.269  | H |
| HETATM | 61 | H | 0 | 1.586  | -0.021 | 2.168  | H |
| HETATM | 62 | C | 0 | 5.734  | -3.042 | -0.070 | C |
| HETATM | 63 | H | 0 | 6.343  | -2.755 | 0.804  | H |
| HETATM | 64 | H | 0 | 5.992  | -4.081 | -0.340 | H |
| HETATM | 65 | H | 0 | 6.066  | -2.410 | -0.917 | H |
| HETATM | 66 | C | 0 | 1.576  | 5.478  | 0.085  | C |
| HETATM | 67 | H | 0 | 1.223  | 6.314  | 0.714  | H |
| HETATM | 68 | H | 0 | 2.650  | 5.644  | -0.107 | H |
| HETATM | 69 | H | 0 | 1.045  | 5.540  | -0.881 | H |
| HETATM | 70 | C | 0 | 1.976  | 3.958  | 2.107  | C |
| HETATM | 71 | H | 0 | 3.067  | 4.116  | 2.078  | H |
| HETATM | 72 | H | 0 | 1.561  | 4.677  | 2.836  | H |
| HETATM | 73 | H | 0 | 1.771  | 2.943  | 2.487  | H |
| HETATM | 74 | H | 0 | -2.626 | -3.707 | 1.164  | H |

|        |    |   |   |        |        |        |   |
|--------|----|---|---|--------|--------|--------|---|
| HETATM | 75 | H | 0 | -0.333 | -4.403 | 1.313  | H |
| HETATM | 76 | C | 0 | -0.524 | 2.075  | -2.237 | C |
| HETATM | 77 | H | 0 | 0.476  | 2.513  | -2.268 | H |
| HETATM | 78 | H | 0 | -0.908 | 1.587  | -3.139 | H |
| HETATM | 79 | C | 0 | -1.350 | 2.376  | -1.190 | C |
| HETATM | 80 | H | 0 | -1.130 | 3.055  | -0.361 | H |
| HETATM | 81 | F | 0 | -2.665 | 2.062  | -1.261 | F |

END

### st3d.pdb

| TITLE  | st3d.pdb |    |   |        |        |        |    |
|--------|----------|----|---|--------|--------|--------|----|
| HETATM | 1        | Ru | 0 | 0.713  | -0.557 | -0.457 | Ru |
| HETATM | 2        | C  | 0 | 0.735  | 3.532  | 1.092  | C  |
| HETATM | 3        | C  | 0 | 2.203  | 3.125  | 1.223  | C  |
| HETATM | 4        | H  | 0 | 0.293  | 3.887  | 2.041  | H  |
| HETATM | 5        | H  | 0 | 2.568  | 3.150  | 2.268  | H  |
| HETATM | 6        | C  | 0 | 0.964  | 1.304  | 0.403  | C  |
| HETATM | 7        | N  | 0 | 2.202  | 1.754  | 0.715  | N  |
| HETATM | 8        | N  | 0 | 0.084  | 2.290  | 0.658  | N  |
| HETATM | 9        | Cl | 0 | 0.161  | -1.618 | 1.682  | Cl |
| HETATM | 10       | Cl | 0 | 1.718  | 0.422  | -2.474 | Cl |
| HETATM | 11       | C  | 0 | -0.844 | -0.600 | -1.542 | C  |
| HETATM | 12       | H  | 0 | -0.555 | -0.309 | -2.572 | H  |
| HETATM | 13       | C  | 0 | -2.281 | -0.787 | -1.488 | C  |
| HETATM | 14       | C  | 0 | -3.049 | -1.495 | -0.509 | C  |
| HETATM | 15       | C  | 0 | -2.986 | -0.165 | -2.550 | C  |
| HETATM | 16       | C  | 0 | -4.453 | -1.425 | -0.559 | C  |
| HETATM | 17       | C  | 0 | -4.371 | -0.122 | -2.602 | C  |
| HETATM | 18       | H  | 0 | -2.395 | 0.327  | -3.332 | H  |
| HETATM | 19       | C  | 0 | -5.099 | -0.741 | -1.584 | C  |
| HETATM | 20       | H  | 0 | -5.055 | -1.940 | 0.191  | H  |
| HETATM | 21       | H  | 0 | -4.881 | 0.390  | -3.426 | H  |
| HETATM | 22       | H  | 0 | -6.196 | -0.718 | -1.597 | H  |
| HETATM | 23       | O  | 0 | -2.356 | -2.261 | 0.325  | O  |
| HETATM | 24       | C  | 0 | -2.877 | -2.894 | 1.512  | C  |
| HETATM | 25       | H  | 0 | -1.940 | -3.284 | 1.945  | H  |
| HETATM | 26       | C  | 0 | 3.362  | 0.924  | 0.624  | C  |
| HETATM | 27       | C  | 0 | 4.243  | 1.049  | -0.470 | C  |
| HETATM | 28       | C  | 0 | 3.613  | -0.009 | 1.652  | C  |
| HETATM | 29       | C  | 0 | 5.259  | 0.101  | -0.611 | C  |
| HETATM | 30       | C  | 0 | 4.639  | -0.944 | 1.465  | C  |
| HETATM | 31       | C  | 0 | 5.438  | -0.931 | 0.317  | C  |
| HETATM | 32       | H  | 0 | 5.920  | 0.163  | -1.485 | H  |
| HETATM | 33       | H  | 0 | 4.825  | -1.689 | 2.249  | H  |
| HETATM | 34       | C  | 0 | -1.335 | 2.190  | 0.559  | C  |
| HETATM | 35       | C  | 0 | -1.975 | 2.548  | -0.639 | C  |
| HETATM | 36       | C  | 0 | -2.069 | 1.785  | 1.690  | C  |
| HETATM | 37       | C  | 0 | -3.373 | 2.500  | -0.686 | C  |
| HETATM | 38       | C  | 0 | -3.463 | 1.731  | 1.592  | C  |
| HETATM | 39       | C  | 0 | -4.130 | 2.091  | 0.415  | C  |
| HETATM | 40       | H  | 0 | -3.882 | 2.767  | -1.621 | H  |
| HETATM | 41       | H  | 0 | -4.043 | 1.408  | 2.467  | H  |
| HETATM | 42       | C  | 0 | 4.153  | 2.199  | -1.425 | C  |
| HETATM | 43       | H  | 0 | 4.472  | 1.902  | -2.438 | H  |
| HETATM | 44       | H  | 0 | 3.130  | 2.594  | -1.515 | H  |
| HETATM | 45       | H  | 0 | 4.819  | 3.024  | -1.099 | H  |
| HETATM | 46       | C  | 0 | 2.855  | 0.036  | 2.944  | C  |
| HETATM | 47       | H  | 0 | 2.658  | 1.074  | 3.268  | H  |
| HETATM | 48       | H  | 0 | 1.876  | -0.473 | 2.871  | H  |
| HETATM | 49       | H  | 0 | 3.426  | -0.463 | 3.746  | H  |

|        |    |   |   |        |        |        |   |
|--------|----|---|---|--------|--------|--------|---|
| HETATM | 50 | C | 0 | 6.464  | -1.996 | 0.079  | C |
| HETATM | 51 | H | 0 | 6.077  | -2.763 | -0.618 | H |
| HETATM | 52 | H | 0 | 7.383  | -1.592 | -0.380 | H |
| HETATM | 53 | H | 0 | 6.745  | -2.519 | 1.009  | H |
| HETATM | 54 | C | 0 | -1.172 | 2.946  | -1.839 | C |
| HETATM | 55 | H | 0 | -1.815 | 3.075  | -2.726 | H |
| HETATM | 56 | H | 0 | -0.639 | 3.904  | -1.685 | H |
| HETATM | 57 | H | 0 | -0.390 | 2.199  | -2.084 | H |
| HETATM | 58 | C | 0 | -1.370 | 1.407  | 2.959  | C |
| HETATM | 59 | H | 0 | -0.677 | 2.197  | 3.309  | H |
| HETATM | 60 | H | 0 | -2.091 | 1.219  | 3.772  | H |
| HETATM | 61 | H | 0 | -0.763 | 0.491  | 2.822  | H |
| HETATM | 62 | C | 0 | -5.628 | 2.061  | 0.353  | C |
| HETATM | 63 | H | 0 | -6.042 | 1.187  | 0.886  | H |
| HETATM | 64 | H | 0 | -6.074 | 2.957  | 0.826  | H |
| HETATM | 65 | H | 0 | -5.995 | 2.029  | -0.688 | H |
| HETATM | 66 | C | 0 | -3.772 | -4.081 | 1.204  | C |
| HETATM | 67 | H | 0 | -3.880 | -4.697 | 2.114  | H |
| HETATM | 68 | H | 0 | -4.788 | -3.812 | 0.871  | H |
| HETATM | 69 | H | 0 | -3.316 | -4.720 | 0.428  | H |
| HETATM | 70 | C | 0 | -3.435 | -1.885 | 2.493  | C |
| HETATM | 71 | H | 0 | -4.389 | -1.432 | 2.171  | H |
| HETATM | 72 | H | 0 | -3.613 | -2.376 | 3.466  | H |
| HETATM | 73 | H | 0 | -2.699 | -1.079 | 2.647  | H |
| HETATM | 74 | H | 0 | 2.882  | 3.758  | 0.623  | H |
| HETATM | 75 | H | 0 | 0.575  | 4.327  | 0.339  | H |
| HETATM | 76 | C | 0 | 0.474  | -2.701 | -1.349 | C |
| HETATM | 77 | H | 0 | -0.215 | -3.140 | -0.621 | H |
| HETATM | 78 | H | 0 | 0.235  | -2.783 | -2.417 | H |
| HETATM | 79 | C | 0 | 1.781  | -2.409 | -0.984 | C |
| HETATM | 80 | H | 0 | 2.179  | -2.607 | 0.023  | H |
| HETATM | 81 | F | 0 | 2.751  | -2.339 | -1.900 | F |

END

### st3I.pdb

|        |          |    |   |        |        |        |    |
|--------|----------|----|---|--------|--------|--------|----|
| TITLE  | st3I.pdb |    |   |        |        |        |    |
| HETATM | 1        | Ru | 0 | 0.516  | -0.509 | -0.352 | Ru |
| HETATM | 2        | C  | 0 | 1.257  | 3.530  | 0.928  | C  |
| HETATM | 3        | C  | 0 | 2.661  | 2.944  | 1.080  | C  |
| HETATM | 4        | H  | 0 | 0.856  | 3.944  | 1.870  | H  |
| HETATM | 5        | H  | 0 | 3.022  | 2.942  | 2.126  | H  |
| HETATM | 6        | C  | 0 | 1.220  | 1.280  | 0.303  | C  |
| HETATM | 7        | N  | 0 | 2.499  | 1.566  | 0.600  | N  |
| HETATM | 8        | N  | 0 | 0.462  | 2.372  | 0.508  | N  |
| HETATM | 9        | Cl | 0 | -0.529 | -0.911 | 1.807  | Cl |
| HETATM | 10       | Cl | 0 | 1.665  | 0.010  | -2.454 | Cl |
| HETATM | 11       | C  | 0 | -0.887 | -1.332 | -1.590 | C  |
| HETATM | 12       | H  | 0 | -0.524 | -1.099 | -2.602 | H  |
| HETATM | 13       | C  | 0 | -2.341 | -1.128 | -1.518 | C  |
| HETATM | 14       | C  | 0 | -3.257 | -1.683 | -0.578 | C  |
| HETATM | 15       | C  | 0 | -2.869 | -0.310 | -2.540 | C  |
| HETATM | 16       | C  | 0 | -4.627 | -1.399 | -0.706 | C  |
| HETATM | 17       | C  | 0 | -4.222 | -0.016 | -2.643 | C  |
| HETATM | 18       | H  | 0 | -2.164 | 0.109  | -3.270 | H  |
| HETATM | 19       | C  | 0 | -5.104 | -0.569 | -1.715 | C  |
| HETATM | 20       | H  | 0 | -5.339 | -1.863 | -0.019 | H  |
| HETATM | 21       | H  | 0 | -4.587 | 0.633  | -3.447 | H  |
| HETATM | 22       | H  | 0 | -6.181 | -0.370 | -1.783 | H  |
| HETATM | 23       | O  | 0 | -2.766 | -2.528 | 0.341  | O  |
| HETATM | 24       | C  | 0 | -3.364 | -2.748 | 1.639  | C  |

|        |    |   |   |        |        |        |   |
|--------|----|---|---|--------|--------|--------|---|
| HETATM | 25 | H | 0 | -2.480 | -3.065 | 2.220  | H |
| HETATM | 26 | C | 0 | 3.592  | 0.652  | 0.483  | C |
| HETATM | 27 | C | 0 | 4.462  | 0.744  | -0.618 | C |
| HETATM | 28 | C | 0 | 3.790  | -0.312 | 1.490  | C |
| HETATM | 29 | C | 0 | 5.486  | -0.200 | -0.735 | C |
| HETATM | 30 | C | 0 | 4.827  | -1.237 | 1.333  | C |
| HETATM | 31 | C | 0 | 5.670  | -1.208 | 0.217  | C |
| HETATM | 32 | H | 0 | 6.152  | -0.152 | -1.607 | H |
| HETATM | 33 | H | 0 | 4.981  | -1.997 | 2.110  | H |
| HETATM | 34 | C | 0 | -0.965 | 2.403  | 0.428  | C |
| HETATM | 35 | C | 0 | -1.583 | 2.560  | -0.826 | C |
| HETATM | 36 | C | 0 | -1.724 | 2.308  | 1.611  | C |
| HETATM | 37 | C | 0 | -2.981 | 2.592  | -0.879 | C |
| HETATM | 38 | C | 0 | -3.116 | 2.325  | 1.508  | C |
| HETATM | 39 | C | 0 | -3.762 | 2.458  | 0.272  | C |
| HETATM | 40 | H | 0 | -3.471 | 2.716  | -1.853 | H |
| HETATM | 41 | H | 0 | -3.716 | 2.221  | 2.423  | H |
| HETATM | 42 | C | 0 | 4.332  | 1.838  | -1.634 | C |
| HETATM | 43 | H | 0 | 4.634  | 1.485  | -2.634 | H |
| HETATM | 44 | H | 0 | 3.296  | 2.202  | -1.725 | H |
| HETATM | 45 | H | 0 | 4.984  | 2.698  | -1.383 | H |
| HETATM | 46 | C | 0 | 2.919  | -0.346 | 2.708  | C |
| HETATM | 47 | H | 0 | 2.798  | 0.657  | 3.160  | H |
| HETATM | 48 | H | 0 | 1.894  | -0.703 | 2.490  | H |
| HETATM | 49 | H | 0 | 3.343  | -1.009 | 3.480  | H |
| HETATM | 50 | C | 0 | 6.735  | -2.246 | 0.032  | C |
| HETATM | 51 | H | 0 | 6.387  | -3.056 | -0.637 | H |
| HETATM | 52 | H | 0 | 7.646  | -1.827 | -0.430 | H |
| HETATM | 53 | H | 0 | 7.022  | -2.720 | 0.986  | H |
| HETATM | 54 | C | 0 | -0.770 | 2.689  | -2.077 | C |
| HETATM | 55 | H | 0 | -1.402 | 2.983  | -2.932 | H |
| HETATM | 56 | H | 0 | 0.033  | 3.443  | -1.978 | H |
| HETATM | 57 | H | 0 | -0.253 | 1.747  | -2.349 | H |
| HETATM | 58 | C | 0 | -1.070 | 2.210  | 2.956  | C |
| HETATM | 59 | H | 0 | -0.933 | 3.209  | 3.416  | H |
| HETATM | 60 | H | 0 | -1.689 | 1.618  | 3.651  | H |
| HETATM | 61 | H | 0 | -0.085 | 1.715  | 2.907  | H |
| HETATM | 62 | C | 0 | -5.259 | 2.451  | 0.198  | C |
| HETATM | 63 | H | 0 | -5.674 | 1.510  | 0.605  | H |
| HETATM | 64 | H | 0 | -5.705 | 3.272  | 0.789  | H |
| HETATM | 65 | H | 0 | -5.621 | 2.549  | -0.840 | H |
| HETATM | 66 | C | 0 | -4.348 | -3.902 | 1.600  | C |
| HETATM | 67 | H | 0 | -4.632 | -4.186 | 2.628  | H |
| HETATM | 68 | H | 0 | -5.277 | -3.659 | 1.056  | H |
| HETATM | 69 | H | 0 | -3.897 | -4.787 | 1.120  | H |
| HETATM | 70 | C | 0 | -3.897 | -1.488 | 2.297  | C |
| HETATM | 71 | H | 0 | -4.893 | -1.178 | 1.936  | H |
| HETATM | 72 | H | 0 | -3.986 | -1.667 | 3.383  | H |
| HETATM | 73 | H | 0 | -3.187 | -0.657 | 2.152  | H |
| HETATM | 74 | H | 0 | 3.418  | 3.469  | 0.470  | H |
| HETATM | 75 | H | 0 | 1.199  | 4.327  | 0.164  | H |
| HETATM | 76 | C | 0 | -0.118 | -2.552 | -1.019 | C |
| HETATM | 77 | H | 0 | -0.772 | -3.133 | -0.355 | H |
| HETATM | 78 | H | 0 | 0.228  | -3.120 | -1.899 | H |
| HETATM | 79 | C | 0 | 1.254  | -2.290 | -0.257 | C |
| HETATM | 80 | H | 0 | 1.284  | -2.762 | 0.741  | H |
| HETATM | 81 | F | 0 | 2.338  | -2.688 | -0.960 | F |

END

| TITLE  | st3e.pdb |    |   |        |        |        |    |
|--------|----------|----|---|--------|--------|--------|----|
| HETATM | 1        | Ru | 0 | -0.484 | -0.655 | 0.289  | Ru |
| HETATM | 2        | Cl | 0 | -1.508 | -0.196 | 2.475  | Cl |
| HETATM | 3        | Cl | 0 | 0.496  | -0.862 | -1.938 | Cl |
| HETATM | 4        | C  | 0 | -1.163 | 1.235  | -0.191 | C  |
| HETATM | 5        | N  | 0 | -2.434 | 1.592  | -0.444 | N  |
| HETATM | 6        | C  | 0 | -2.564 | 3.013  | -0.787 | C  |
| HETATM | 7        | C  | 0 | -1.146 | 3.543  | -0.589 | C  |
| HETATM | 8        | N  | 0 | -0.384 | 2.328  | -0.286 | N  |
| HETATM | 9        | C  | 0 | -3.577 | 0.732  | -0.394 | C  |
| HETATM | 10       | C  | 0 | -4.419 | 0.760  | 0.730  | C  |
| HETATM | 11       | C  | 0 | -5.516 | -0.110 | 0.757  | C  |
| HETATM | 12       | C  | 0 | -5.793 | -0.979 | -0.301 | C  |
| HETATM | 13       | C  | 0 | -4.963 | -0.947 | -1.429 | C  |
| HETATM | 14       | C  | 0 | -3.859 | -0.094 | -1.502 | C  |
| HETATM | 15       | C  | 0 | -4.200 | 1.712  | 1.866  | C  |
| HETATM | 16       | C  | 0 | -6.940 | -1.940 | -0.225 | C  |
| HETATM | 17       | C  | 0 | -3.003 | -0.051 | -2.730 | C  |
| HETATM | 18       | C  | 0 | 1.048  | 2.322  | -0.297 | C  |
| HETATM | 19       | C  | 0 | 1.723  | 2.321  | -1.532 | C  |
| HETATM | 20       | C  | 0 | 3.121  | 2.332  | -1.521 | C  |
| HETATM | 21       | C  | 0 | 3.849  | 2.362  | -0.328 | C  |
| HETATM | 22       | C  | 0 | 3.148  | 2.403  | 0.882  | C  |
| HETATM | 23       | C  | 0 | 1.751  | 2.383  | 0.923  | C  |
| HETATM | 24       | C  | 0 | 0.989  | 2.331  | -2.839 | C  |
| HETATM | 25       | C  | 0 | 5.347  | 2.316  | -0.343 | C  |
| HETATM | 26       | C  | 0 | 1.020  | 2.456  | 2.227  | C  |
| HETATM | 27       | H  | 0 | -3.306 | 3.497  | -0.126 | H  |
| HETATM | 28       | H  | 0 | -2.930 | 3.122  | -1.826 | H  |
| HETATM | 29       | H  | 0 | -1.061 | 4.262  | 0.248  | H  |
| HETATM | 30       | H  | 0 | -0.736 | 4.036  | -1.489 | H  |
| HETATM | 31       | H  | 0 | -6.168 | -0.109 | 1.640  | H  |
| HETATM | 32       | H  | 0 | -5.187 | -1.599 | -2.284 | H  |
| HETATM | 33       | H  | 0 | -4.395 | 1.223  | 2.834  | H  |
| HETATM | 34       | H  | 0 | -4.887 | 2.579  | 1.795  | H  |
| HETATM | 35       | H  | 0 | -3.166 | 2.089  | 1.909  | H  |
| HETATM | 36       | H  | 0 | -6.612 | -2.925 | 0.160  | H  |
| HETATM | 37       | H  | 0 | -7.734 | -1.584 | 0.453  | H  |
| HETATM | 38       | H  | 0 | -7.392 | -2.124 | -1.215 | H  |
| HETATM | 39       | H  | 0 | -1.957 | -0.357 | -2.535 | H  |
| HETATM | 40       | H  | 0 | -2.945 | 0.970  | -3.155 | H  |
| HETATM | 41       | H  | 0 | -3.404 | -0.711 | -3.517 | H  |
| HETATM | 42       | H  | 0 | 3.658  | 2.306  | -2.480 | H  |
| HETATM | 43       | H  | 0 | 3.703  | 2.451  | 1.827  | H  |
| HETATM | 44       | H  | 0 | -0.039 | 1.943  | -2.752 | H  |
| HETATM | 45       | H  | 0 | 1.503  | 1.697  | -3.582 | H  |
| HETATM | 46       | H  | 0 | 0.938  | 3.352  | -3.266 | H  |
| HETATM | 47       | H  | 0 | 5.771  | 2.841  | -1.216 | H  |
| HETATM | 48       | H  | 0 | 5.709  | 1.270  | -0.392 | H  |
| HETATM | 49       | H  | 0 | 5.783  | 2.758  | 0.570  | H  |
| HETATM | 50       | H  | 0 | 0.356  | 3.341  | 2.275  | H  |
| HETATM | 51       | H  | 0 | 1.724  | 2.521  | 3.074  | H  |
| HETATM | 52       | H  | 0 | 0.362  | 1.582  | 2.399  | H  |
| HETATM | 53       | C  | 0 | 0.809  | -1.898 | 1.497  | C  |
| HETATM | 54       | C  | 0 | 2.186  | -1.389 | 1.529  | C  |
| HETATM | 55       | C  | 0 | 3.209  | -1.655 | 0.575  | C  |
| HETATM | 56       | C  | 0 | 4.508  | -1.180 | 0.819  | C  |
| HETATM | 57       | C  | 0 | 4.802  | -0.442 | 1.963  | C  |
| HETATM | 58       | C  | 0 | 3.805  | -0.160 | 2.898  | C  |
| HETATM | 59       | C  | 0 | 2.520  | -0.634 | 2.673  | C  |
| HETATM | 60       | O  | 0 | 2.872  | -2.432 | -0.463 | O  |
| HETATM | 61       | C  | 0 | 3.580  | -2.480 | -1.720 | C  |



|        |    |   |   |        |        |        |   |
|--------|----|---|---|--------|--------|--------|---|
| HETATM | 62 | C | 0 | 3.987  | -1.120 | -2.258 | C |
| HETATM | 63 | C | 0 | 4.703  | -3.499 | -1.678 | C |
| HETATM | 64 | H | 0 | 5.314  | -1.420 | 0.122  | H |
| HETATM | 65 | H | 0 | 5.829  | -0.092 | 2.124  | H |
| HETATM | 66 | H | 0 | 4.031  | 0.422  | 3.799  | H |
| HETATM | 67 | H | 0 | 1.720  | -0.432 | 3.397  | H |
| HETATM | 68 | H | 0 | 2.786  | -2.865 | -2.383 | H |
| HETATM | 69 | H | 0 | 3.182  | -0.385 | -2.091 | H |
| HETATM | 70 | H | 0 | 4.141  | -1.203 | -3.349 | H |
| HETATM | 71 | H | 0 | 4.926  | -0.730 | -1.830 | H |
| HETATM | 72 | H | 0 | 5.550  | -3.180 | -1.046 | H |
| HETATM | 73 | H | 0 | 5.097  | -3.664 | -2.696 | H |
| HETATM | 74 | H | 0 | 4.342  | -4.469 | -1.297 | H |
| HETATM | 75 | H | 0 | 0.348  | -1.868 | 2.494  | H |
| HETATM | 76 | C | 0 | 0.161  | -2.812 | 0.595  | C |
| HETATM | 77 | C | 0 | -1.598 | -2.071 | -0.106 | C |
| HETATM | 78 | F | 0 | -2.591 | -2.556 | 0.635  | F |
| HETATM | 79 | H | 0 | -0.475 | -3.558 | 1.092  | H |
| HETATM | 80 | H | 0 | 0.683  | -3.155 | -0.304 | H |
| HETATM | 81 | H | 0 | -1.629 | -2.556 | -1.106 | H |

END

### st3f.pdb

| TITLE  | st3f.pdb |    |   |        |        |        |    |
|--------|----------|----|---|--------|--------|--------|----|
| HETATM | 1        | Ru | 0 | -0.471 | -0.723 | 0.438  | Ru |
| HETATM | 2        | C  | 0 | -1.150 | 3.432  | -0.456 | C  |
| HETATM | 3        | C  | 0 | -2.602 | 2.991  | -0.328 | C  |
| HETATM | 4        | H  | 0 | -0.897 | 3.793  | -1.472 | H  |
| HETATM | 5        | H  | 0 | -3.216 | 3.239  | -1.212 | H  |
| HETATM | 6        | C  | 0 | -1.209 | 1.115  | -0.060 | C  |
| HETATM | 7        | N  | 0 | -2.492 | 1.537  | -0.175 | N  |
| HETATM | 8        | N  | 0 | -0.407 | 2.203  | -0.172 | N  |
| HETATM | 9        | Cl | 0 | 0.125  | -1.187 | -1.887 | Cl |
| HETATM | 10       | Cl | 0 | -0.857 | -0.039 | 2.763  | Cl |
| HETATM | 11       | C  | 0 | 1.092  | -2.160 | 1.628  | C  |
| HETATM | 12       | C  | 0 | 2.367  | -1.442 | 1.527  | C  |
| HETATM | 13       | C  | 0 | 3.313  | -1.604 | 0.474  | C  |
| HETATM | 14       | C  | 0 | 2.712  | -0.619 | 2.619  | C  |
| HETATM | 15       | C  | 0 | 4.559  | -0.963 | 0.574  | C  |
| HETATM | 16       | C  | 0 | 3.943  | 0.019  | 2.700  | C  |
| HETATM | 17       | H  | 0 | 1.967  | -0.492 | 3.414  | H  |
| HETATM | 18       | C  | 0 | 4.867  | -0.164 | 1.672  | C  |
| HETATM | 19       | H  | 0 | 5.314  | -1.112 | -0.202 | H  |
| HETATM | 20       | H  | 0 | 4.183  | 0.652  | 3.562  | H  |
| HETATM | 21       | H  | 0 | 5.851  | 0.320  | 1.719  | H  |
| HETATM | 22       | O  | 0 | 2.960  | -2.439 | -0.513 | O  |
| HETATM | 23       | C  | 0 | 3.583  | -2.508 | -1.810 | C  |
| HETATM | 24       | H  | 0 | 2.819  | -3.078 | -2.368 | H  |
| HETATM | 25       | C  | 0 | -3.653 | 0.719  | -0.309 | C  |
| HETATM | 26       | C  | 0 | -4.499 | 0.485  | 0.792  | C  |
| HETATM | 27       | C  | 0 | -3.959 | 0.204  | -1.585 | C  |
| HETATM | 28       | C  | 0 | -5.627 | -0.322 | 0.601  | C  |
| HETATM | 29       | C  | 0 | -5.098 | -0.593 | -1.731 | C  |
| HETATM | 30       | C  | 0 | -5.936 | -0.877 | -0.646 | C  |
| HETATM | 31       | H  | 0 | -6.282 | -0.523 | 1.459  | H  |
| HETATM | 32       | H  | 0 | -5.335 | -1.003 | -2.722 | H  |
| HETATM | 33       | C  | 0 | 1.016  | 2.198  | -0.329 | C  |
| HETATM | 34       | C  | 0 | 1.838  | 2.493  | 0.780  | C  |
| HETATM | 35       | C  | 0 | 1.567  | 2.056  | -1.620 | C  |
| HETATM | 36       | C  | 0 | 3.220  | 2.571  | 0.582  | C  |

|        |    |   |   |        |        |        |   |
|--------|----|---|---|--------|--------|--------|---|
| HETATM | 37 | C | 0 | 2.956  | 2.122  | -1.762 | C |
| HETATM | 38 | C | 0 | 3.799  | 2.364  | -0.674 | C |
| HETATM | 39 | H | 0 | 3.862  | 2.800  | 1.443  | H |
| HETATM | 40 | H | 0 | 3.390  | 1.991  | -2.763 | H |
| HETATM | 41 | C | 0 | -4.204 | 1.079  | 2.132  | C |
| HETATM | 42 | H | 0 | -4.883 | 0.679  | 2.903  | H |
| HETATM | 43 | H | 0 | -3.165 | 0.874  | 2.451  | H |
| HETATM | 44 | H | 0 | -4.330 | 2.179  | 2.128  | H |
| HETATM | 45 | C | 0 | -3.053 | 0.469  | -2.746 | C |
| HETATM | 46 | H | 0 | -2.830 | 1.546  | -2.865 | H |
| HETATM | 47 | H | 0 | -2.075 | -0.040 | -2.620 | H |
| HETATM | 48 | H | 0 | -3.496 | 0.112  | -3.690 | H |
| HETATM | 49 | C | 0 | -7.129 | -1.770 | -0.811 | C |
| HETATM | 50 | H | 0 | -6.879 | -2.821 | -0.573 | H |
| HETATM | 51 | H | 0 | -7.954 | -1.483 | -0.137 | H |
| HETATM | 52 | H | 0 | -7.511 | -1.761 | -1.845 | H |
| HETATM | 53 | C | 0 | 1.251  | 2.770  | 2.128  | C |
| HETATM | 54 | H | 0 | 2.044  | 2.911  | 2.881  | H |
| HETATM | 55 | H | 0 | 0.635  | 3.690  | 2.125  | H |
| HETATM | 56 | H | 0 | 0.591  | 1.953  | 2.475  | H |
| HETATM | 57 | C | 0 | 0.708  | 1.932  | -2.842 | C |
| HETATM | 58 | H | 0 | 0.581  | 2.917  | -3.333 | H |
| HETATM | 59 | H | 0 | 1.168  | 1.260  | -3.585 | H |
| HETATM | 60 | H | 0 | -0.290 | 1.524  | -2.624 | H |
| HETATM | 61 | C | 0 | 5.286  | 2.379  | -0.847 | C |
| HETATM | 62 | H | 0 | 5.701  | 1.353  | -0.782 | H |
| HETATM | 63 | H | 0 | 5.587  | 2.781  | -1.831 | H |
| HETATM | 64 | H | 0 | 5.789  | 2.973  | -0.065 | H |
| HETATM | 65 | C | 0 | 4.856  | -3.334 | -1.786 | C |
| HETATM | 66 | H | 0 | 5.165  | -3.568 | -2.820 | H |
| HETATM | 67 | H | 0 | 5.702  | -2.819 | -1.300 | H |
| HETATM | 68 | H | 0 | 4.694  | -4.291 | -1.261 | H |
| HETATM | 69 | C | 0 | 3.710  | -1.158 | -2.488 | C |
| HETATM | 70 | H | 0 | 4.533  | -0.537 | -2.094 | H |
| HETATM | 71 | H | 0 | 3.902  | -1.312 | -3.565 | H |
| HETATM | 72 | H | 0 | 2.765  | -0.600 | -2.385 | H |
| HETATM | 73 | H | 0 | -3.106 | 3.426  | 0.556  | H |
| HETATM | 74 | H | 0 | -0.870 | 4.227  | 0.257  | H |
| HETATM | 75 | C | 0 | 0.447  | -2.985 | 0.740  | C |
| HETATM | 76 | H | 0 | 0.831  | -3.221 | -0.254 | H |
| HETATM | 77 | C | 0 | -2.023 | -1.630 | 0.308  | C |
| HETATM | 78 | H | 0 | 0.654  | -2.096 | 2.631  | H |
| HETATM | 79 | H | 0 | -0.401 | -3.575 | 1.106  | H |
| HETATM | 80 | F | 0 | -2.617 | -2.296 | 1.294  | F |
| HETATM | 81 | H | 0 | -2.594 | -1.816 | -0.628 | H |

END

### ac3a.pdb

|        |          |    |   |        |        |        |    |
|--------|----------|----|---|--------|--------|--------|----|
| TITLE  | ac3a.pdb |    |   |        |        |        |    |
| HETATM | 1        | Ru | 0 | 0.053  | 0.289  | 0.120  | Ru |
| HETATM | 2        | C  | 0 | 1.012  | -3.902 | 0.265  | C  |
| HETATM | 3        | C  | 0 | -0.506 | -3.916 | 0.241  | C  |
| HETATM | 4        | H  | 0 | 1.433  | -4.280 | 1.218  | H  |
| HETATM | 5        | H  | 0 | -0.956 | -4.450 | 1.098  | H  |
| HETATM | 6        | C  | 0 | 0.234  | -1.669 | 0.140  | C  |
| HETATM | 7        | N  | 0 | -0.846 | -2.498 | 0.293  | N  |
| HETATM | 8        | N  | 0 | 1.328  | -2.484 | 0.100  | N  |
| HETATM | 9        | Cl | 0 | -0.424 | 0.397  | 2.440  | Cl |
| HETATM | 10       | Cl | 0 | -0.710 | 0.492  | -2.120 | Cl |
| HETATM | 11       | C  | 0 | 1.814  | 0.823  | -0.036 | C  |

|        |    |   |   |        |        |        |   |
|--------|----|---|---|--------|--------|--------|---|
| HETATM | 12 | H | 0 | 2.666  | 0.132  | -0.118 | H |
| HETATM | 13 | C | 0 | 2.179  | 2.216  | -0.095 | C |
| HETATM | 14 | C | 0 | 1.174  | 3.206  | 0.041  | C |
| HETATM | 15 | C | 0 | 3.515  | 2.623  | -0.282 | C |
| HETATM | 16 | C | 0 | 1.504  | 4.560  | -0.018 | C |
| HETATM | 17 | C | 0 | 3.846  | 3.973  | -0.332 | C |
| HETATM | 18 | H | 0 | 4.287  | 1.850  | -0.387 | H |
| HETATM | 19 | C | 0 | 2.839  | 4.932  | -0.200 | C |
| HETATM | 20 | H | 0 | 0.738  | 5.333  | 0.068  | H |
| HETATM | 21 | H | 0 | 4.887  | 4.282  | -0.476 | H |
| HETATM | 22 | H | 0 | 3.089  | 5.999  | -0.245 | H |
| HETATM | 23 | O | 0 | -0.063 | 2.681  | 0.201  | O |
| HETATM | 24 | C | 0 | -1.213 | 3.430  | 0.692  | C |
| HETATM | 25 | H | 0 | -1.919 | 2.603  | 0.870  | H |
| HETATM | 26 | C | 0 | -2.228 | -2.150 | 0.180  | C |
| HETATM | 27 | C | 0 | -2.829 | -2.132 | -1.099 | C |
| HETATM | 28 | C | 0 | -3.011 | -2.024 | 1.347  | C |
| HETATM | 29 | C | 0 | -4.200 | -1.877 | -1.186 | C |
| HETATM | 30 | C | 0 | -4.380 | -1.768 | 1.207  | C |
| HETATM | 31 | C | 0 | -4.988 | -1.675 | -0.048 | C |
| HETATM | 32 | H | 0 | -4.669 | -1.840 | -2.179 | H |
| HETATM | 33 | H | 0 | -4.990 | -1.652 | 2.113  | H |
| HETATM | 34 | C | 0 | 2.698  | -2.126 | -0.050 | C |
| HETATM | 35 | C | 0 | 3.231  | -2.017 | -1.347 | C |
| HETATM | 36 | C | 0 | 3.488  | -1.900 | 1.091  | C |
| HETATM | 37 | C | 0 | 4.584  | -1.688 | -1.484 | C |
| HETATM | 38 | C | 0 | 4.836  | -1.573 | 0.910  | C |
| HETATM | 39 | C | 0 | 5.399  | -1.462 | -0.368 | C |
| HETATM | 40 | H | 0 | 5.009  | -1.595 | -2.492 | H |
| HETATM | 41 | H | 0 | 5.460  | -1.385 | 1.793  | H |
| HETATM | 42 | C | 0 | -2.067 | -2.472 | -2.344 | C |
| HETATM | 43 | H | 0 | -2.377 | -1.837 | -3.190 | H |
| HETATM | 44 | H | 0 | -0.979 | -2.343 | -2.236 | H |
| HETATM | 45 | H | 0 | -2.262 | -3.522 | -2.641 | H |
| HETATM | 46 | C | 0 | -2.438 | -2.247 | 2.713  | C |
| HETATM | 47 | H | 0 | -2.769 | -1.470 | 3.422  | H |
| HETATM | 48 | H | 0 | -2.783 | -3.219 | 3.119  | H |
| HETATM | 49 | H | 0 | -1.339 | -2.239 | 2.716  | H |
| HETATM | 50 | C | 0 | -6.442 | -1.339 | -0.174 | C |
| HETATM | 51 | H | 0 | -6.582 | -0.248 | -0.299 | H |
| HETATM | 52 | H | 0 | -6.904 | -1.818 | -1.055 | H |
| HETATM | 53 | H | 0 | -7.016 | -1.634 | 0.720  | H |
| HETATM | 54 | C | 0 | 2.342  | -2.175 | -2.541 | C |
| HETATM | 55 | H | 0 | 2.916  | -2.137 | -3.481 | H |
| HETATM | 56 | H | 0 | 1.781  | -3.128 | -2.528 | H |
| HETATM | 57 | H | 0 | 1.581  | -1.370 | -2.578 | H |
| HETATM | 58 | C | 0 | 2.872  | -1.924 | 2.456  | C |
| HETATM | 59 | H | 0 | 2.363  | -2.880 | 2.676  | H |
| HETATM | 60 | H | 0 | 3.629  | -1.763 | 3.241  | H |
| HETATM | 61 | H | 0 | 2.100  | -1.138 | 2.562  | H |
| HETATM | 62 | C | 0 | 6.836  | -1.070 | -0.539 | C |
| HETATM | 63 | H | 0 | 7.454  | -1.374 | 0.323  | H |
| HETATM | 64 | H | 0 | 7.279  | -1.509 | -1.449 | H |
| HETATM | 65 | H | 0 | 6.945  | 0.028  | -0.634 | H |
| HETATM | 66 | C | 0 | -1.794 | 4.319  | -0.387 | C |
| HETATM | 67 | H | 0 | -2.831 | 4.588  | -0.123 | H |
| HETATM | 68 | H | 0 | -1.236 | 5.260  | -0.535 | H |
| HETATM | 69 | H | 0 | -1.829 | 3.782  | -1.350 | H |
| HETATM | 70 | C | 0 | -0.935 | 4.098  | 2.020  | C |
| HETATM | 71 | H | 0 | -0.270 | 4.974  | 1.948  | H |
| HETATM | 72 | H | 0 | -1.891 | 4.448  | 2.448  | H |
| HETATM | 73 | H | 0 | -0.494 | 3.374  | 2.725  | H |

|        |    |   |   |        |        |        |   |
|--------|----|---|---|--------|--------|--------|---|
| HETATM | 74 | H | 0 | -0.917 | -4.372 | -0.682 | H |
| HETATM | 75 | H | 0 | 1.472  | -4.496 | -0.547 | H |
| HETATM | 76 | C | 0 | -3.928 | 1.933  | -1.295 | C |
| HETATM | 77 | C | 0 | -3.805 | 1.368  | -0.099 | C |
| HETATM | 78 | H | 0 | -3.080 | 0.556  | 0.034  | H |
| HETATM | 79 | H | 0 | -4.407 | 1.685  | 0.762  | H |
| HETATM | 80 | H | 0 | -3.346 | 1.656  | -2.182 | H |
| HETATM | 81 | F | 0 | -4.779 | 2.941  | -1.532 | F |

END

### ac3b.pdb

| TITLE  | ac3b.pdb |    |   |        |        |        |    |
|--------|----------|----|---|--------|--------|--------|----|
| HETATM | 1        | Ru | 0 | -0.561 | 0.333  | -0.496 | Ru |
| HETATM | 2        | C  | 0 | -0.682 | -3.449 | 1.587  | C  |
| HETATM | 3        | C  | 0 | -2.145 | -3.031 | 1.523  | C  |
| HETATM | 4        | H  | 0 | -0.275 | -3.430 | 2.618  | H  |
| HETATM | 5        | H  | 0 | -2.635 | -2.995 | 2.513  | H  |
| HETATM | 6        | C  | 0 | -0.828 | -1.401 | 0.447  | C  |
| HETATM | 7        | N  | 0 | -2.064 | -1.696 | 0.939  | N  |
| HETATM | 8        | N  | 0 | -0.011 | -2.431 | 0.772  | N  |
| HETATM | 9        | Cl | 0 | -0.703 | 1.401  | 1.693  | Cl |
| HETATM | 10       | Cl | 0 | -1.013 | -0.746 | -2.662 | Cl |
| HETATM | 11       | C  | 0 | 1.252  | 0.119  | -0.851 | C  |
| HETATM | 12       | H  | 0 | 1.474  | -0.827 | -1.387 | H  |
| HETATM | 13       | C  | 0 | 2.466  | 0.891  | -0.690 | C  |
| HETATM | 14       | C  | 0 | 2.572  | 2.203  | -0.126 | C  |
| HETATM | 15       | C  | 0 | 3.664  | 0.249  | -1.092 | C  |
| HETATM | 16       | C  | 0 | 3.844  | 2.781  | 0.035  | C  |
| HETATM | 17       | C  | 0 | 4.913  | 0.827  | -0.924 | C  |
| HETATM | 18       | H  | 0 | 3.577  | -0.749 | -1.540 | H  |
| HETATM | 19       | C  | 0 | 4.994  | 2.098  | -0.350 | C  |
| HETATM | 20       | H  | 0 | 3.939  | 3.787  | 0.446  | H  |
| HETATM | 21       | H  | 0 | 5.819  | 0.297  | -1.239 | H  |
| HETATM | 22       | H  | 0 | 5.969  | 2.581  | -0.215 | H  |
| HETATM | 23       | O  | 0 | 1.428  | 2.814  | 0.166  | O  |
| HETATM | 24       | C  | 0 | 1.293  | 3.951  | 1.043  | C  |
| HETATM | 25       | H  | 0 | 0.203  | 3.931  | 1.218  | H  |
| HETATM | 26       | C  | 0 | -3.240 | -0.950 | 0.602  | C  |
| HETATM | 27       | C  | 0 | -3.882 | -1.191 | -0.634 | C  |
| HETATM | 28       | C  | 0 | -3.780 | -0.035 | 1.529  | C  |
| HETATM | 29       | C  | 0 | -4.959 | -0.375 | -0.992 | C  |
| HETATM | 30       | C  | 0 | -4.864 | 0.755  | 1.128  | C  |
| HETATM | 31       | C  | 0 | -5.442 | 0.624  | -0.138 | C  |
| HETATM | 32       | H  | 0 | -5.447 | -0.541 | -1.962 | H  |
| HETATM | 33       | H  | 0 | -5.273 | 1.487  | 1.837  | H  |
| HETATM | 34       | C  | 0 | 1.394  | -2.557 | 0.554  | C  |
| HETATM | 35       | C  | 0 | 1.834  | -3.344 | -0.529 | C  |
| HETATM | 36       | C  | 0 | 2.303  | -1.963 | 1.448  | C  |
| HETATM | 37       | C  | 0 | 3.208  | -3.541 | -0.692 | C  |
| HETATM | 38       | C  | 0 | 3.670  | -2.184 | 1.242  | C  |
| HETATM | 39       | C  | 0 | 4.140  | -2.970 | 0.187  | C  |
| HETATM | 40       | H  | 0 | 3.561  | -4.149 | -1.535 | H  |
| HETATM | 41       | H  | 0 | 4.390  | -1.715 | 1.927  | H  |
| HETATM | 42       | C  | 0 | -3.526 | -2.366 | -1.493 | C  |
| HETATM | 43       | H  | 0 | -3.675 | -2.144 | -2.562 | H  |
| HETATM | 44       | H  | 0 | -2.480 | -2.688 | -1.380 | H  |
| HETATM | 45       | H  | 0 | -4.182 | -3.224 | -1.243 | H  |
| HETATM | 46       | C  | 0 | -3.298 | 0.038  | 2.945  | C  |
| HETATM | 47       | H  | 0 | -3.223 | 1.080  | 3.296  | H  |
| HETATM | 48       | H  | 0 | -4.015 | -0.481 | 3.613  | H  |

|        |    |   |   |        |        |        |   |
|--------|----|---|---|--------|--------|--------|---|
| HETATM | 49 | H | 0 | -2.306 | -0.418 | 3.078  | H |
| HETATM | 50 | C | 0 | -6.560 | 1.525  | -0.569 | C |
| HETATM | 51 | H | 0 | -6.173 | 2.411  | -1.109 | H |
| HETATM | 52 | H | 0 | -7.258 | 1.019  | -1.258 | H |
| HETATM | 53 | H | 0 | -7.139 | 1.905  | 0.289  | H |
| HETATM | 54 | C | 0 | 0.848  | -3.884 | -1.517 | C |
| HETATM | 55 | H | 0 | 1.336  | -4.531 | -2.264 | H |
| HETATM | 56 | H | 0 | 0.043  | -4.472 | -1.037 | H |
| HETATM | 57 | H | 0 | 0.340  | -3.058 | -2.056 | H |
| HETATM | 58 | C | 0 | 1.826  | -1.072 | 2.550  | C |
| HETATM | 59 | H | 0 | 0.966  | -1.496 | 3.099  | H |
| HETATM | 60 | H | 0 | 2.629  | -0.864 | 3.277  | H |
| HETATM | 61 | H | 0 | 1.462  | -0.104 | 2.153  | H |
| HETATM | 62 | C | 0 | 5.609  | -3.155 | -0.042 | C |
| HETATM | 63 | H | 0 | 6.204  | -2.877 | 0.844  | H |
| HETATM | 64 | H | 0 | 5.859  | -4.196 | -0.309 | H |
| HETATM | 65 | H | 0 | 5.965  | -2.525 | -0.880 | H |
| HETATM | 66 | C | 0 | 1.637  | 5.255  | 0.348  | C |
| HETATM | 67 | H | 0 | 1.275  | 6.102  | 0.958  | H |
| HETATM | 68 | H | 0 | 2.720  | 5.404  | 0.194  | H |
| HETATM | 69 | H | 0 | 1.144  | 5.315  | -0.636 | H |
| HETATM | 70 | C | 0 | 1.951  | 3.739  | 2.391  | C |
| HETATM | 71 | H | 0 | 3.050  | 3.831  | 2.376  | H |
| HETATM | 72 | H | 0 | 1.569  | 4.493  | 3.101  | H |
| HETATM | 73 | H | 0 | 1.684  | 2.744  | 2.786  | H |
| HETATM | 74 | H | 0 | -2.753 | -3.696 | 0.876  | H |
| HETATM | 75 | H | 0 | -0.493 | -4.459 | 1.182  | H |
| HETATM | 76 | C | 0 | -0.570 | 2.374  | -2.283 | C |
| HETATM | 77 | C | 0 | -1.453 | 2.452  | -1.262 | C |
| HETATM | 78 | H | 0 | -2.407 | 1.914  | -1.360 | H |
| HETATM | 79 | H | 0 | -1.354 | 3.192  | -0.461 | H |
| HETATM | 80 | H | 0 | -0.664 | 1.699  | -3.141 | H |
| HETATM | 81 | F | 0 | 0.489  | 3.171  | -2.374 | F |

END

### ac3c.pdb

|        |          |    |   |        |        |        |    |
|--------|----------|----|---|--------|--------|--------|----|
| TITLE  | ac3c.pdb |    |   |        |        |        |    |
| HETATM | 1        | Ru | 0 | -0.552 | 0.366  | -0.494 | Ru |
| HETATM | 2        | C  | 0 | -0.787 | -3.401 | 1.616  | C  |
| HETATM | 3        | C  | 0 | -2.238 | -2.942 | 1.553  | C  |
| HETATM | 4        | H  | 0 | -0.378 | -3.394 | 2.645  | H  |
| HETATM | 5        | H  | 0 | -2.713 | -2.861 | 2.548  | H  |
| HETATM | 6        | C  | 0 | -0.880 | -1.359 | 0.453  | C  |
| HETATM | 7        | N  | 0 | -2.131 | -1.628 | 0.926  | N  |
| HETATM | 8        | N  | 0 | -0.088 | -2.404 | 0.799  | N  |
| HETATM | 9        | Cl | 0 | -0.687 | 1.432  | 1.699  | Cl |
| HETATM | 10       | Cl | 0 | -1.068 | -0.688 | -2.655 | Cl |
| HETATM | 11       | C  | 0 | 1.251  | 0.078  | -0.863 | C  |
| HETATM | 12       | H  | 0 | 1.429  | -0.879 | -1.395 | H  |
| HETATM | 13       | C  | 0 | 2.495  | 0.804  | -0.723 | C  |
| HETATM | 14       | C  | 0 | 2.663  | 2.099  | -0.134 | C  |
| HETATM | 15       | C  | 0 | 3.656  | 0.136  | -1.187 | C  |
| HETATM | 16       | C  | 0 | 3.957  | 2.634  | -0.011 | C  |
| HETATM | 17       | C  | 0 | 4.927  | 0.676  | -1.064 | C  |
| HETATM | 18       | H  | 0 | 3.523  | -0.851 | -1.649 | H  |
| HETATM | 19       | C  | 0 | 5.069  | 1.931  | -0.466 | C  |
| HETATM | 20       | H  | 0 | 4.100  | 3.625  | 0.423  | H  |
| HETATM | 21       | H  | 0 | 5.803  | 0.130  | -1.432 | H  |
| HETATM | 22       | H  | 0 | 6.063  | 2.382  | -0.362 | H  |
| HETATM | 23       | O  | 0 | 1.549  | 2.728  | 0.225  | O  |

|        |    |   |   |        |        |        |   |
|--------|----|---|---|--------|--------|--------|---|
| HETATM | 24 | C | 0 | 1.478  | 3.871  | 1.100  | C |
| HETATM | 25 | H | 0 | 0.393  | 3.892  | 1.303  | H |
| HETATM | 26 | C | 0 | -3.291 | -0.869 | 0.578  | C |
| HETATM | 27 | C | 0 | -3.940 | -1.122 | -0.651 | C |
| HETATM | 28 | C | 0 | -3.820 | 0.065  | 1.492  | C |
| HETATM | 29 | C | 0 | -5.016 | -0.307 | -1.017 | C |
| HETATM | 30 | C | 0 | -4.899 | 0.859  | 1.081  | C |
| HETATM | 31 | C | 0 | -5.486 | 0.711  | -0.179 | C |
| HETATM | 32 | H | 0 | -5.509 | -0.486 | -1.982 | H |
| HETATM | 33 | H | 0 | -5.299 | 1.605  | 1.780  | H |
| HETATM | 34 | C | 0 | 1.312  | -2.562 | 0.584  | C |
| HETATM | 35 | C | 0 | 1.737  | -3.371 | -0.488 | C |
| HETATM | 36 | C | 0 | 2.236  | -1.976 | 1.467  | C |
| HETATM | 37 | C | 0 | 3.106  | -3.595 | -0.654 | C |
| HETATM | 38 | C | 0 | 3.599  | -2.220 | 1.260  | C |
| HETATM | 39 | C | 0 | 4.050  | -3.026 | 0.212  | C |
| HETATM | 40 | H | 0 | 3.444  | -4.221 | -1.491 | H |
| HETATM | 41 | H | 0 | 4.329  | -1.755 | 1.936  | H |
| HETATM | 42 | C | 0 | -3.594 | -2.311 | -1.496 | C |
| HETATM | 43 | H | 0 | -3.746 | -2.103 | -2.567 | H |
| HETATM | 44 | H | 0 | -2.549 | -2.637 | -1.381 | H |
| HETATM | 45 | H | 0 | -4.253 | -3.163 | -1.231 | H |
| HETATM | 46 | C | 0 | -3.345 | 0.150  | 2.910  | C |
| HETATM | 47 | H | 0 | -3.260 | 1.196  | 3.247  | H |
| HETATM | 48 | H | 0 | -4.074 | -0.351 | 3.579  | H |
| HETATM | 49 | H | 0 | -2.359 | -0.314 | 3.058  | H |
| HETATM | 50 | C | 0 | -6.600 | 1.610  | -0.619 | C |
| HETATM | 51 | H | 0 | -6.217 | 2.458  | -1.219 | H |
| HETATM | 52 | H | 0 | -7.331 | 1.082  | -1.256 | H |
| HETATM | 53 | H | 0 | -7.143 | 2.046  | 0.236  | H |
| HETATM | 54 | C | 0 | 0.738  | -3.906 | -1.467 | C |
| HETATM | 55 | H | 0 | 1.215  | -4.564 | -2.212 | H |
| HETATM | 56 | H | 0 | -0.071 | -4.481 | -0.979 | H |
| HETATM | 57 | H | 0 | 0.238  | -3.079 | -2.011 | H |
| HETATM | 58 | C | 0 | 1.779  | -1.065 | 2.561  | C |
| HETATM | 59 | H | 0 | 0.917  | -1.471 | 3.121  | H |
| HETATM | 60 | H | 0 | 2.589  | -0.859 | 3.280  | H |
| HETATM | 61 | H | 0 | 1.426  | -0.097 | 2.153  | H |
| HETATM | 62 | C | 0 | 5.515  | -3.241 | -0.019 | C |
| HETATM | 63 | H | 0 | 6.120  | -2.940 | 0.852  | H |
| HETATM | 64 | H | 0 | 5.749  | -4.296 | -0.249 | H |
| HETATM | 65 | H | 0 | 5.874  | -2.648 | -0.883 | H |
| HETATM | 66 | C | 0 | 1.851  | 5.162  | 0.394  | C |
| HETATM | 67 | H | 0 | 1.523  | 6.021  | 1.005  | H |
| HETATM | 68 | H | 0 | 2.934  | 5.280  | 0.220  | H |
| HETATM | 69 | H | 0 | 1.342  | 5.231  | -0.582 | H |
| HETATM | 70 | C | 0 | 2.164  | 3.633  | 2.431  | C |
| HETATM | 71 | H | 0 | 3.265  | 3.647  | 2.378  | H |
| HETATM | 72 | H | 0 | 1.859  | 4.420  | 3.142  | H |
| HETATM | 73 | H | 0 | 1.844  | 2.663  | 2.848  | H |
| HETATM | 74 | H | 0 | -2.873 | -3.608 | 0.935  | H |
| HETATM | 75 | H | 0 | -0.629 | -4.416 | 1.210  | H |
| HETATM | 76 | C | 0 | -0.438 | 2.388  | -2.250 | C |
| HETATM | 77 | C | 0 | -1.313 | 2.534  | -1.229 | C |
| HETATM | 78 | H | 0 | -2.308 | 2.078  | -1.324 | H |
| HETATM | 79 | H | 0 | -1.156 | 3.266  | -0.429 | H |
| HETATM | 80 | H | 0 | -0.584 | 1.725  | -3.110 | H |
| HETATM | 81 | F | 0 | 0.677  | 3.106  | -2.342 | F |

END

| TITLE  | ac3d.pdb |    |   |        |        |        |    |
|--------|----------|----|---|--------|--------|--------|----|
| HETATM | 1        | Ru | 0 | 0.627  | -0.692 | -0.392 | Ru |
| HETATM | 2        | C  | 0 | 1.046  | 3.335  | 1.187  | C  |
| HETATM | 3        | C  | 0 | 2.445  | 2.795  | 1.452  | C  |
| HETATM | 4        | H  | 0 | 0.564  | 3.767  | 2.081  | H  |
| HETATM | 5        | H  | 0 | 2.666  | 2.681  | 2.532  | H  |
| HETATM | 6        | C  | 0 | 1.155  | 1.116  | 0.457  | C  |
| HETATM | 7        | N  | 0 | 2.405  | 1.477  | 0.814  | N  |
| HETATM | 8        | N  | 0 | 0.322  | 2.139  | 0.735  | N  |
| HETATM | 9        | Cl | 0 | 0.270  | -1.522 | 1.867  | Cl |
| HETATM | 10       | Cl | 0 | 1.809  | 0.006  | -2.440 | Cl |
| HETATM | 11       | C  | 0 | -0.882 | -0.723 | -1.569 | C  |
| HETATM | 12       | H  | 0 | -0.572 | -0.501 | -2.609 | H  |
| HETATM | 13       | C  | 0 | -2.333 | -0.735 | -1.487 | C  |
| HETATM | 14       | C  | 0 | -3.133 | -1.074 | -0.354 | C  |
| HETATM | 15       | C  | 0 | -2.998 | -0.327 | -2.668 | C  |
| HETATM | 16       | C  | 0 | -4.533 | -0.993 | -0.457 | C  |
| HETATM | 17       | C  | 0 | -4.380 | -0.242 | -2.756 | C  |
| HETATM | 18       | H  | 0 | -2.381 | -0.065 | -3.537 | H  |
| HETATM | 19       | C  | 0 | -5.145 | -0.583 | -1.637 | C  |
| HETATM | 20       | H  | 0 | -5.153 | -1.233 | 0.409  | H  |
| HETATM | 21       | H  | 0 | -4.859 | 0.080  | -3.686 | H  |
| HETATM | 22       | H  | 0 | -6.240 | -0.522 | -1.677 | H  |
| HETATM | 23       | O  | 0 | -2.478 | -1.430 | 0.743  | O  |
| HETATM | 24       | C  | 0 | -3.021 | -2.239 | 1.807  | C  |
| HETATM | 25       | H  | 0 | -2.086 | -2.554 | 2.301  | H  |
| HETATM | 26       | C  | 0 | 3.589  | 0.725  | 0.538  | C  |
| HETATM | 27       | C  | 0 | 4.344  | 1.061  | -0.606 | C  |
| HETATM | 28       | C  | 0 | 4.008  | -0.301 | 1.405  | C  |
| HETATM | 29       | C  | 0 | 5.464  | 0.289  | -0.918 | C  |
| HETATM | 30       | C  | 0 | 5.128  | -1.062 | 1.042  | C  |
| HETATM | 31       | C  | 0 | 5.853  | -0.796 | -0.121 | C  |
| HETATM | 32       | H  | 0 | 6.039  | 0.531  | -1.821 | H  |
| HETATM | 33       | H  | 0 | 5.448  | -1.877 | 1.706  | H  |
| HETATM | 34       | C  | 0 | -1.090 | 2.170  | 0.520  | C  |
| HETATM | 35       | C  | 0 | -1.599 | 2.510  | -0.746 | C  |
| HETATM | 36       | C  | 0 | -1.946 | 1.932  | 1.612  | C  |
| HETATM | 37       | C  | 0 | -2.988 | 2.592  | -0.904 | C  |
| HETATM | 38       | C  | 0 | -3.326 | 2.027  | 1.410  | C  |
| HETATM | 39       | C  | 0 | -3.864 | 2.355  | 0.160  | C  |
| HETATM | 40       | H  | 0 | -3.395 | 2.845  | -1.892 | H  |
| HETATM | 41       | H  | 0 | -4.001 | 1.837  | 2.256  | H  |
| HETATM | 42       | C  | 0 | 3.996  | 2.247  | -1.454 | C  |
| HETATM | 43       | H  | 0 | 4.309  | 2.091  | -2.499 | H  |
| HETATM | 44       | H  | 0 | 2.913  | 2.448  | -1.471 | H  |
| HETATM | 45       | H  | 0 | 4.513  | 3.160  | -1.094 | H  |
| HETATM | 46       | C  | 0 | 3.358  | -0.552 | 2.732  | C  |
| HETATM | 47       | H  | 0 | 2.435  | 0.028  | 2.882  | H  |
| HETATM | 48       | H  | 0 | 3.081  | -1.612 | 2.856  | H  |
| HETATM | 49       | H  | 0 | 4.061  | -0.304 | 3.551  | H  |
| HETATM | 50       | C  | 0 | 7.017  | -1.654 | -0.516 | C  |
| HETATM | 51       | H  | 0 | 6.714  | -2.422 | -1.253 | H  |
| HETATM | 52       | H  | 0 | 7.822  | -1.066 | -0.991 | H  |
| HETATM | 53       | H  | 0 | 7.447  | -2.190 | 0.346  | H  |
| HETATM | 54       | C  | 0 | -0.681 | 2.772  | -1.901 | C  |
| HETATM | 55       | H  | 0 | -1.251 | 2.974  | -2.823 | H  |
| HETATM | 56       | H  | 0 | -0.030 | 3.649  | -1.722 | H  |
| HETATM | 57       | H  | 0 | 0.001  | 1.923  | -2.105 | H  |
| HETATM | 58       | C  | 0 | -1.389 | 1.560  | 2.951  | C  |
| HETATM | 59       | H  | 0 | -0.598 | 2.255  | 3.289  | H  |
| HETATM | 60       | H  | 0 | -2.174 | 1.554  | 3.725  | H  |
| HETATM | 61       | H  | 0 | -0.924 | 0.555  | 2.917  | H  |

|        |    |   |   |        |        |        |   |
|--------|----|---|---|--------|--------|--------|---|
| HETATM | 62 | C | 0 | -5.346 | 2.479  | -0.021 | C |
| HETATM | 63 | H | 0 | -5.890 | 1.672  | 0.503  | H |
| HETATM | 64 | H | 0 | -5.728 | 3.434  | 0.388  | H |
| HETATM | 65 | H | 0 | -5.635 | 2.442  | -1.085 | H |
| HETATM | 66 | C | 0 | -3.729 | -3.485 | 1.310  | C |
| HETATM | 67 | H | 0 | -3.858 | -4.182 | 2.156  | H |
| HETATM | 68 | H | 0 | -4.730 | -3.298 | 0.887  | H |
| HETATM | 69 | H | 0 | -3.121 | -3.998 | 0.547  | H |
| HETATM | 70 | C | 0 | -3.811 | -1.415 | 2.806  | C |
| HETATM | 71 | H | 0 | -4.789 | -1.071 | 2.426  | H |
| HETATM | 72 | H | 0 | -4.005 | -2.021 | 3.709  | H |
| HETATM | 73 | H | 0 | -3.231 | -0.531 | 3.117  | H |
| HETATM | 74 | H | 0 | 3.244  | 3.415  | 1.010  | H |
| HETATM | 75 | H | 0 | 1.025  | 4.108  | 0.393  | H |
| HETATM | 76 | C | 0 | -0.005 | -2.643 | -1.424 | C |
| HETATM | 77 | C | 0 | 1.317  | -2.614 | -0.895 | C |
| HETATM | 78 | H | 0 | 2.150  | -2.512 | -1.603 | H |
| HETATM | 79 | H | 0 | 1.492  | -3.191 | 0.023  | H |
| HETATM | 80 | F | 0 | -0.937 | -3.382 | -0.793 | F |
| HETATM | 81 | H | 0 | -0.148 | -2.667 | -2.513 | H |

END

### ac3I.pdb

|        |          |    |   |        |        |        |    |
|--------|----------|----|---|--------|--------|--------|----|
| TITLE  | ac3I.pdb |    |   |        |        |        |    |
| HETATM | 1        | Ru | 0 | -0.477 | -0.672 | 0.063  | Ru |
| HETATM | 2        | C  | 0 | -1.340 | 3.474  | -0.290 | C  |
| HETATM | 3        | C  | 0 | -2.735 | 2.937  | -0.592 | C  |
| HETATM | 4        | H  | 0 | -0.945 | 4.134  | -1.081 | H  |
| HETATM | 5        | H  | 0 | -3.035 | 3.085  | -1.648 | H  |
| HETATM | 6        | C  | 0 | -1.314 | 1.144  | -0.171 | C  |
| HETATM | 7        | N  | 0 | -2.603 | 1.501  | -0.318 | N  |
| HETATM | 8        | N  | 0 | -0.542 | 2.248  | -0.205 | N  |
| HETATM | 9        | Cl | 0 | 0.258  | -0.581 | -2.226 | Cl |
| HETATM | 10       | Cl | 0 | -1.847 | -0.682 | 2.135  | Cl |
| HETATM | 11       | C  | 0 | 0.854  | -1.550 | 1.338  | C  |
| HETATM | 12       | H  | 0 | 0.380  | -1.586 | 2.331  | H  |
| HETATM | 13       | C  | 0 | 2.285  | -1.253 | 1.494  | C  |
| HETATM | 14       | C  | 0 | 3.236  | -1.168 | 0.437  | C  |
| HETATM | 15       | C  | 0 | 2.735  | -1.004 | 2.807  | C  |
| HETATM | 16       | C  | 0 | 4.582  | -0.899 | 0.737  | C  |
| HETATM | 17       | C  | 0 | 4.067  | -0.731 | 3.095  | C  |
| HETATM | 18       | H  | 0 | 2.000  | -1.049 | 3.621  | H  |
| HETATM | 19       | C  | 0 | 4.993  | -0.688 | 2.050  | C  |
| HETATM | 20       | H  | 0 | 5.309  | -0.816 | -0.075 | H  |
| HETATM | 21       | H  | 0 | 4.384  | -0.555 | 4.129  | H  |
| HETATM | 22       | H  | 0 | 6.049  | -0.471 | 2.253  | H  |
| HETATM | 23       | O  | 0 | 2.739  | -1.271 | -0.790 | O  |
| HETATM | 24       | C  | 0 | 3.439  | -1.754 | -1.948 | C  |
| HETATM | 25       | H  | 0 | 2.593  | -2.104 | -2.566 | H  |
| HETATM | 26       | C  | 0 | -3.746 | 0.647  | -0.252 | C  |
| HETATM | 27       | C  | 0 | -4.580 | 0.723  | 0.881  | C  |
| HETATM | 28       | C  | 0 | -4.052 | -0.215 | -1.319 | C  |
| HETATM | 29       | C  | 0 | -5.698 | -0.110 | 0.945  | C  |
| HETATM | 30       | C  | 0 | -5.180 | -1.039 | -1.210 | C  |
| HETATM | 31       | C  | 0 | -6.006 | -1.008 | -0.084 | C  |
| HETATM | 32       | H  | 0 | -6.338 | -0.070 | 1.836  | H  |
| HETATM | 33       | H  | 0 | -5.421 | -1.716 | -2.041 | H  |
| HETATM | 34       | C  | 0 | 0.886  | 2.259  | -0.118 | C  |
| HETATM | 35       | C  | 0 | 1.511  | 2.095  | 1.134  | C  |
| HETATM | 36       | C  | 0 | 1.642  | 2.504  | -1.283 | C  |



|        |    |   |   |        |        |        |   |
|--------|----|---|---|--------|--------|--------|---|
| HETATM | 37 | C | 0 | 2.909  | 2.137  | 1.190  | C |
| HETATM | 38 | C | 0 | 3.034  | 2.545  | -1.177 | C |
| HETATM | 39 | C | 0 | 3.684  | 2.359  | 0.049  | C |
| HETATM | 40 | H | 0 | 3.403  | 1.989  | 2.159  | H |
| HETATM | 41 | H | 0 | 3.628  | 2.726  | -2.083 | H |
| HETATM | 42 | C | 0 | -4.292 | 1.672  | 2.005  | C |
| HETATM | 43 | H | 0 | -4.646 | 1.263  | 2.965  | H |
| HETATM | 44 | H | 0 | -3.211 | 1.864  | 2.116  | H |
| HETATM | 45 | H | 0 | -4.804 | 2.646  | 1.865  | H |
| HETATM | 46 | C | 0 | -3.212 | -0.274 | -2.557 | C |
| HETATM | 47 | H | 0 | -2.701 | 0.679  | -2.774 | H |
| HETATM | 48 | H | 0 | -2.405 | -1.024 | -2.476 | H |
| HETATM | 49 | H | 0 | -3.824 | -0.546 | -3.434 | H |
| HETATM | 50 | C | 0 | -7.183 | -1.928 | 0.033  | C |
| HETATM | 51 | H | 0 | -6.932 | -2.826 | 0.629  | H |
| HETATM | 52 | H | 0 | -8.037 | -1.445 | 0.540  | H |
| HETATM | 53 | H | 0 | -7.529 | -2.285 | -0.952 | H |
| HETATM | 54 | C | 0 | 0.712  | 1.939  | 2.393  | C |
| HETATM | 55 | H | 0 | 1.371  | 1.946  | 3.277  | H |
| HETATM | 56 | H | 0 | -0.022 | 2.758  | 2.517  | H |
| HETATM | 57 | H | 0 | 0.120  | 1.004  | 2.424  | H |
| HETATM | 58 | C | 0 | 0.983  | 2.754  | -2.606 | C |
| HETATM | 59 | H | 0 | 0.845  | 3.838  | -2.790 | H |
| HETATM | 60 | H | 0 | 1.600  | 2.366  | -3.434 | H |
| HETATM | 61 | H | 0 | -0.001 | 2.265  | -2.681 | H |
| HETATM | 62 | C | 0 | 5.179  | 2.425  | 0.130  | C |
| HETATM | 63 | H | 0 | 5.658  | 1.662  | -0.512 | H |
| HETATM | 64 | H | 0 | 5.562  | 3.404  | -0.216 | H |
| HETATM | 65 | H | 0 | 5.543  | 2.268  | 1.160  | H |
| HETATM | 66 | C | 0 | 4.333  | -2.946 | -1.664 | C |
| HETATM | 67 | H | 0 | 4.583  | -3.442 | -2.618 | H |
| HETATM | 68 | H | 0 | 5.287  | -2.687 | -1.173 | H |
| HETATM | 69 | H | 0 | 3.809  | -3.684 | -1.034 | H |
| HETATM | 70 | C | 0 | 4.107  | -0.615 | -2.693 | C |
| HETATM | 71 | H | 0 | 4.942  | -0.163 | -2.128 | H |
| HETATM | 72 | H | 0 | 4.509  | -0.977 | -3.656 | H |
| HETATM | 73 | H | 0 | 3.365  | 0.173  | -2.906 | H |
| HETATM | 74 | H | 0 | -3.519 | 3.379  | 0.045  | H |
| HETATM | 75 | H | 0 | -1.287 | 4.028  | 0.668  | H |
| HETATM | 76 | C | 0 | 0.283  | -2.786 | 0.527  | C |
| HETATM | 77 | C | 0 | -1.090 | -2.546 | -0.151 | C |
| HETATM | 78 | H | 0 | -1.947 | -2.859 | 0.465  | H |
| HETATM | 79 | H | 0 | -1.104 | -2.921 | -1.187 | H |
| HETATM | 80 | F | 0 | 1.184  | -3.370 | -0.324 | F |
| HETATM | 81 | H | 0 | 0.080  | -3.507 | 1.342  | H |

END

### ac3e.pdb

|        |          |    |   |        |        |        |    |
|--------|----------|----|---|--------|--------|--------|----|
| TITLE  | ac3e.pdb |    |   |        |        |        |    |
| HETATM | 1        | Ru | 0 | -0.558 | -0.621 | 0.344  | Ru |
| HETATM | 2        | Cl | 0 | -1.606 | -0.165 | 2.529  | Cl |
| HETATM | 3        | Cl | 0 | 0.423  | -0.926 | -1.850 | Cl |
| HETATM | 4        | C  | 0 | -1.243 | 1.216  | -0.243 | C  |
| HETATM | 5        | N  | 0 | -2.526 | 1.542  | -0.498 | N  |
| HETATM | 6        | C  | 0 | -2.679 | 2.938  | -0.921 | C  |
| HETATM | 7        | C  | 0 | -1.268 | 3.498  | -0.770 | C  |
| HETATM | 8        | N  | 0 | -0.482 | 2.312  | -0.419 | N  |
| HETATM | 9        | C  | 0 | -3.651 | 0.664  | -0.408 | C  |
| HETATM | 10       | C  | 0 | -4.495 | 0.728  | 0.714  | C  |
| HETATM | 11       | C  | 0 | -5.565 | -0.172 | 0.789  | C  |

|        |    |   |   |        |        |        |   |
|--------|----|---|---|--------|--------|--------|---|
| HETATM | 12 | C | 0 | -5.815 | -1.106 | -0.221 | C |
| HETATM | 13 | C | 0 | -4.986 | -1.109 | -1.350 | C |
| HETATM | 14 | C | 0 | -3.907 | -0.227 | -1.470 | C |
| HETATM | 15 | C | 0 | -4.298 | 1.750  | 1.791  | C |
| HETATM | 16 | C | 0 | -6.941 | -2.088 | -0.094 | C |
| HETATM | 17 | C | 0 | -3.051 | -0.227 | -2.697 | C |
| HETATM | 18 | C | 0 | 0.948  | 2.354  | -0.392 | C |
| HETATM | 19 | C | 0 | 1.658  | 2.336  | -1.608 | C |
| HETATM | 20 | C | 0 | 3.052  | 2.425  | -1.562 | C |
| HETATM | 21 | C | 0 | 3.743  | 2.548  | -0.352 | C |
| HETATM | 22 | C | 0 | 3.007  | 2.594  | 0.836  | C |
| HETATM | 23 | C | 0 | 1.612  | 2.495  | 0.842  | C |
| HETATM | 24 | C | 0 | 0.958  | 2.246  | -2.930 | C |
| HETATM | 25 | C | 0 | 5.240  | 2.604  | -0.330 | C |
| HETATM | 26 | C | 0 | 0.846  | 2.568  | 2.127  | C |
| HETATM | 27 | H | 0 | -3.421 | 3.450  | -0.283 | H |
| HETATM | 28 | H | 0 | -3.056 | 2.981  | -1.961 | H |
| HETATM | 29 | H | 0 | -1.183 | 4.258  | 0.031  | H |
| HETATM | 30 | H | 0 | -0.877 | 3.953  | -1.698 | H |
| HETATM | 31 | H | 0 | -6.218 | -0.142 | 1.671  | H |
| HETATM | 32 | H | 0 | -5.190 | -1.811 | -2.169 | H |
| HETATM | 33 | H | 0 | -3.250 | 2.078  | 1.869  | H |
| HETATM | 34 | H | 0 | -4.581 | 1.347  | 2.778  | H |
| HETATM | 35 | H | 0 | -4.932 | 2.642  | 1.614  | H |
| HETATM | 36 | H | 0 | -6.624 | -2.993 | 0.458  | H |
| HETATM | 37 | H | 0 | -7.796 | -1.666 | 0.461  | H |
| HETATM | 38 | H | 0 | -7.305 | -2.427 | -1.078 | H |
| HETATM | 39 | H | 0 | -2.023 | -0.589 | -2.498 | H |
| HETATM | 40 | H | 0 | -2.936 | 0.789  | -3.120 | H |
| HETATM | 41 | H | 0 | -3.483 | -0.867 | -3.484 | H |
| HETATM | 42 | H | 0 | 3.616  | 2.390  | -2.504 | H |
| HETATM | 43 | H | 0 | 3.532  | 2.714  | 1.792  | H |
| HETATM | 44 | H | 0 | 1.540  | 1.636  | -3.641 | H |
| HETATM | 45 | H | 0 | 0.833  | 3.246  | -3.392 | H |
| HETATM | 46 | H | 0 | -0.036 | 1.775  | -2.848 | H |
| HETATM | 47 | H | 0 | 5.678  | 1.593  | -0.445 | H |
| HETATM | 48 | H | 0 | 5.645  | 3.218  | -1.155 | H |
| HETATM | 49 | H | 0 | 5.625  | 3.012  | 0.620  | H |
| HETATM | 50 | H | 0 | 1.527  | 2.688  | 2.987  | H |
| HETATM | 51 | H | 0 | 0.230  | 1.667  | 2.311  | H |
| HETATM | 52 | H | 0 | 0.139  | 3.420  | 2.138  | H |
| HETATM | 53 | C | 0 | 0.788  | -1.834 | 1.576  | C |
| HETATM | 54 | C | 0 | 2.160  | -1.307 | 1.581  | C |
| HETATM | 55 | C | 0 | 3.188  | -1.567 | 0.630  | C |
| HETATM | 56 | C | 0 | 4.463  | -1.014 | 0.837  | C |
| HETATM | 57 | C | 0 | 4.733  | -0.221 | 1.949  | C |
| HETATM | 58 | C | 0 | 3.733  | 0.050  | 2.883  | C |
| HETATM | 59 | C | 0 | 2.468  | -0.488 | 2.689  | C |
| HETATM | 60 | O | 0 | 2.878  | -2.401 | -0.362 | O |
| HETATM | 61 | C | 0 | 3.544  | -2.469 | -1.637 | C |
| HETATM | 62 | C | 0 | 4.696  | -3.455 | -1.593 | C |
| HETATM | 63 | C | 0 | 3.902  | -1.116 | -2.226 | C |
| HETATM | 64 | H | 0 | 0.311  | -1.693 | 2.556  | H |
| HETATM | 65 | H | 0 | 5.270  | -1.244 | 0.137  | H |
| HETATM | 66 | H | 0 | 5.744  | 0.184  | 2.085  | H |
| HETATM | 67 | H | 0 | 3.938  | 0.676  | 3.759  | H |
| HETATM | 68 | H | 0 | 1.666  | -0.283 | 3.410  | H |
| HETATM | 69 | H | 0 | 5.078  | -3.633 | -2.614 | H |
| HETATM | 70 | H | 0 | 4.370  | -4.425 | -1.182 | H |
| HETATM | 71 | H | 0 | 5.542  | -3.093 | -0.982 | H |
| HETATM | 72 | H | 0 | 2.739  | -2.897 | -2.261 | H |
| HETATM | 73 | H | 0 | 4.863  | -0.712 | -1.865 | H |

|        |    |   |   |        |        |        |   |
|--------|----|---|---|--------|--------|--------|---|
| HETATM | 74 | H | 0 | 3.101  | -0.387 | -2.019 | H |
| HETATM | 75 | H | 0 | 3.985  | -1.216 | -3.323 | H |
| HETATM | 76 | C | 0 | 0.056  | -2.830 | 0.858  | C |
| HETATM | 77 | C | 0 | -1.759 | -2.006 | 0.102  | C |
| HETATM | 78 | F | 0 | 0.527  | -3.548 | -0.158 | F |
| HETATM | 79 | H | 0 | -0.631 | -3.434 | 1.470  | H |
| HETATM | 80 | H | 0 | -1.782 | -2.604 | -0.833 | H |
| HETATM | 81 | H | 0 | -2.546 | -2.238 | 0.849  | H |

END

### ac3f.pdb

| TITLE  | ac3f.pdb |    |   |        |        |        |    |
|--------|----------|----|---|--------|--------|--------|----|
| HETATM | 1        | Ru | 0 | -0.539 | -0.605 | 0.434  | Ru |
| HETATM | 2        | Cl | 0 | -1.201 | 0.013  | 2.715  | Cl |
| HETATM | 3        | Cl | 0 | 0.284  | -1.243 | -1.742 | Cl |
| HETATM | 4        | C  | 0 | -1.348 | 1.102  | -0.192 | C  |
| HETATM | 5        | N  | 0 | -2.647 | 1.426  | -0.407 | N  |
| HETATM | 6        | C  | 0 | -2.834 | 2.849  | -0.697 | C  |
| HETATM | 7        | C  | 0 | -1.406 | 3.352  | -0.858 | C  |
| HETATM | 8        | N  | 0 | -0.608 | 2.223  | -0.382 | N  |
| HETATM | 9        | C  | 0 | -3.772 | 0.551  | -0.359 | C  |
| HETATM | 10       | C  | 0 | -4.628 | 0.565  | 0.759  | C  |
| HETATM | 11       | C  | 0 | -5.733 | -0.294 | 0.756  | C  |
| HETATM | 12       | C  | 0 | -6.006 | -1.142 | -0.322 | C  |
| HETATM | 13       | C  | 0 | -5.157 | -1.106 | -1.435 | C  |
| HETATM | 14       | C  | 0 | -4.043 | -0.263 | -1.480 | C  |
| HETATM | 15       | C  | 0 | -4.374 | 1.473  | 1.921  | C  |
| HETATM | 16       | C  | 0 | -7.172 | -2.083 | -0.283 | C  |
| HETATM | 17       | C  | 0 | -3.159 | -0.211 | -2.686 | C  |
| HETATM | 18       | C  | 0 | 0.819  | 2.273  | -0.486 | C  |
| HETATM | 19       | C  | 0 | 1.427  | 2.095  | -1.745 | C  |
| HETATM | 20       | C  | 0 | 2.817  | 2.225  | -1.834 | C  |
| HETATM | 21       | C  | 0 | 3.600  | 2.553  | -0.723 | C  |
| HETATM | 22       | C  | 0 | 2.963  | 2.766  | 0.504  | C  |
| HETATM | 23       | C  | 0 | 1.579  | 2.629  | 0.647  | C  |
| HETATM | 24       | C  | 0 | 0.633  | 1.828  | -2.987 | C  |
| HETATM | 25       | C  | 0 | 5.090  | 2.648  | -0.838 | C  |
| HETATM | 26       | C  | 0 | 0.920  | 2.878  | 1.969  | C  |
| HETATM | 27       | H  | 0 | -3.367 | 3.339  | 0.140  | H  |
| HETATM | 28       | H  | 0 | -3.451 | 2.978  | -1.604 | H  |
| HETATM | 29       | H  | 0 | -1.189 | 4.258  | -0.263 | H  |
| HETATM | 30       | H  | 0 | -1.147 | 3.579  | -1.912 | H  |
| HETATM | 31       | H  | 0 | -6.397 | -0.302 | 1.631  | H  |
| HETATM | 32       | H  | 0 | -5.372 | -1.747 | -2.301 | H  |
| HETATM | 33       | H  | 0 | -3.295 | 1.623  | 2.096  | H  |
| HETATM | 34       | H  | 0 | -4.803 | 1.060  | 2.849  | H  |
| HETATM | 35       | H  | 0 | -4.841 | 2.467  | 1.771  | H  |
| HETATM | 36       | H  | 0 | -6.867 | -3.086 | 0.074  | H  |
| HETATM | 37       | H  | 0 | -7.964 | -1.731 | 0.399  | H  |
| HETATM | 38       | H  | 0 | -7.619 | -2.228 | -1.281 | H  |
| HETATM | 39       | H  | 0 | -2.130 | -0.560 | -2.466 | H  |
| HETATM | 40       | H  | 0 | -3.058 | 0.820  | -3.075 | H  |
| HETATM | 41       | H  | 0 | -3.557 | -0.838 | -3.501 | H  |
| HETATM | 42       | H  | 0 | 3.300  | 2.070  | -2.808 | H  |
| HETATM | 43       | H  | 0 | 3.559  | 3.050  | 1.380  | H  |
| HETATM | 44       | H  | 0 | 1.159  | 1.115  | -3.644 | H  |
| HETATM | 45       | H  | 0 | -0.355 | 1.388  | -2.778 | H  |
| HETATM | 46       | H  | 0 | 0.483  | 2.757  | -3.573 | H  |
| HETATM | 47       | H  | 0 | 5.561  | 1.656  | -0.692 | H  |
| HETATM | 48       | H  | 0 | 5.409  | 3.008  | -1.832 | H  |

|        |    |   |   |        |        |        |   |
|--------|----|---|---|--------|--------|--------|---|
| HETATM | 49 | H | 0 | 5.522  | 3.319  | -0.075 | H |
| HETATM | 50 | H | 0 | 1.649  | 3.236  | 2.714  | H |
| HETATM | 51 | H | 0 | 0.437  | 1.968  | 2.374  | H |
| HETATM | 52 | H | 0 | 0.114  | 3.632  | 1.894  | H |
| HETATM | 53 | C | 0 | 1.120  | -2.011 | 1.717  | C |
| HETATM | 54 | C | 0 | 2.371  | -1.252 | 1.647  | C |
| HETATM | 55 | C | 0 | 3.395  | -1.435 | 0.677  | C |
| HETATM | 56 | C | 0 | 4.581  | -0.690 | 0.786  | C |
| HETATM | 57 | C | 0 | 4.755  | 0.228  | 1.819  | C |
| HETATM | 58 | C | 0 | 3.751  | 0.430  | 2.766  | C |
| HETATM | 59 | C | 0 | 2.575  | -0.304 | 2.671  | C |
| HETATM | 60 | O | 0 | 3.172  | -2.383 | -0.236 | O |
| HETATM | 61 | C | 0 | 3.778  | -2.445 | -1.540 | C |
| HETATM | 62 | C | 0 | 5.088  | -3.209 | -1.499 | C |
| HETATM | 63 | C | 0 | 3.852  | -1.104 | -2.243 | C |
| HETATM | 64 | H | 0 | 0.548  | -1.786 | 2.626  | H |
| HETATM | 65 | H | 0 | 5.391  | -0.856 | 0.073  | H |
| HETATM | 66 | H | 0 | 5.695  | 0.791  | 1.880  | H |
| HETATM | 67 | H | 0 | 3.882  | 1.161  | 3.573  | H |
| HETATM | 68 | H | 0 | 1.771  | -0.155 | 3.403  | H |
| HETATM | 69 | H | 0 | 5.434  | -3.420 | -2.526 | H |
| HETATM | 70 | H | 0 | 4.964  | -4.176 | -0.981 | H |
| HETATM | 71 | H | 0 | 5.891  | -2.650 | -0.988 | H |
| HETATM | 72 | H | 0 | 3.032  | -3.057 | -2.079 | H |
| HETATM | 73 | H | 0 | 4.707  | -0.479 | -1.931 | H |
| HETATM | 74 | H | 0 | 2.918  | -0.542 | -2.074 | H |
| HETATM | 75 | H | 0 | 3.952  | -1.272 | -3.330 | H |
| HETATM | 76 | C | 0 | 0.517  | -3.039 | 1.049  | C |
| HETATM | 77 | C | 0 | -2.041 | -1.614 | 0.297  | C |
| HETATM | 78 | H | 0 | -2.823 | -1.644 | 1.086  | H |
| HETATM | 79 | H | 0 | -2.190 | -2.312 | -0.558 | H |
| HETATM | 80 | H | 0 | -0.398 | -3.481 | 1.461  | H |
| HETATM | 81 | F | 0 | 0.933  | -3.704 | -0.007 | F |

END

### at3a.pdb

|        |          |    |   |        |        |        |    |
|--------|----------|----|---|--------|--------|--------|----|
| TITLE  | at3a.pdb |    |   |        |        |        |    |
| HETATM | 1        | Ru | 0 | -0.019 | 0.361  | 0.139  | Ru |
| HETATM | 2        | C  | 0 | 0.268  | -3.886 | -0.482 | C  |
| HETATM | 3        | C  | 0 | -1.236 | -3.660 | -0.448 | C  |
| HETATM | 4        | H  | 0 | 0.620  | -4.600 | 0.286  | H  |
| HETATM | 5        | H  | 0 | -1.739 | -4.210 | 0.371  | H  |
| HETATM | 6        | C  | 0 | -0.148 | -1.589 | -0.081 | C  |
| HETATM | 7        | N  | 0 | -1.349 | -2.221 | -0.228 | N  |
| HETATM | 8        | N  | 0 | 0.810  | -2.553 | -0.219 | N  |
| HETATM | 9        | Cl | 0 | -0.726 | 0.360  | 2.424  | Cl |
| HETATM | 10       | Cl | 0 | -0.189 | 0.748  | -2.207 | Cl |
| HETATM | 11       | C  | 0 | 1.804  | 0.569  | 0.288  | C  |
| HETATM | 12       | H  | 0 | 2.531  | -0.198 | 0.600  | H  |
| HETATM | 13       | C  | 0 | 2.375  | 1.838  | -0.109 | C  |
| HETATM | 14       | C  | 0 | 1.530  | 2.965  | -0.206 | C  |
| HETATM | 15       | C  | 0 | 3.723  | 1.965  | -0.493 | C  |
| HETATM | 16       | C  | 0 | 2.001  | 4.169  | -0.721 | C  |
| HETATM | 17       | C  | 0 | 4.201  | 3.173  | -0.994 | C  |
| HETATM | 18       | H  | 0 | 4.380  | 1.089  | -0.412 | H  |
| HETATM | 19       | C  | 0 | 3.339  | 4.266  | -1.117 | C  |
| HETATM | 20       | H  | 0 | 1.326  | 5.022  | -0.833 | H  |
| HETATM | 21       | H  | 0 | 5.248  | 3.264  | -1.304 | H  |
| HETATM | 22       | H  | 0 | 3.709  | 5.212  | -1.529 | H  |
| HETATM | 23       | O  | 0 | 0.243  | 2.782  | 0.249  | O  |

|        |    |   |   |        |        |        |   |
|--------|----|---|---|--------|--------|--------|---|
| HETATM | 24 | C | 0 | -0.144 | 3.518  | 1.468  | C |
| HETATM | 25 | H | 0 | -0.978 | 2.903  | 1.836  | H |
| HETATM | 26 | C | 0 | -2.660 | -1.669 | -0.102 | C |
| HETATM | 27 | C | 0 | -3.369 | -1.283 | -1.258 | C |
| HETATM | 28 | C | 0 | -3.299 | -1.707 | 1.157  | C |
| HETATM | 29 | C | 0 | -4.697 | -0.861 | -1.117 | C |
| HETATM | 30 | C | 0 | -4.622 | -1.264 | 1.249  | C |
| HETATM | 31 | C | 0 | -5.334 | -0.832 | 0.125  | C |
| HETATM | 32 | H | 0 | -5.245 | -0.544 | -2.014 | H |
| HETATM | 33 | H | 0 | -5.116 | -1.280 | 2.230  | H |
| HETATM | 34 | C | 0 | 2.220  | -2.421 | -0.090 | C |
| HETATM | 35 | C | 0 | 3.006  | -2.177 | -1.230 | C |
| HETATM | 36 | C | 0 | 2.801  | -2.554 | 1.183  | C |
| HETATM | 37 | C | 0 | 4.392  | -2.070 | -1.072 | C |
| HETATM | 38 | C | 0 | 4.191  | -2.441 | 1.300  | C |
| HETATM | 39 | C | 0 | 5.000  | -2.196 | 0.184  | C |
| HETATM | 40 | H | 0 | 5.012  | -1.872 | -1.956 | H |
| HETATM | 41 | H | 0 | 4.651  | -2.535 | 2.292  | H |
| HETATM | 42 | C | 0 | -2.784 | -1.377 | -2.634 | C |
| HETATM | 43 | H | 0 | -2.844 | -0.407 | -3.155 | H |
| HETATM | 44 | H | 0 | -1.723 | -1.669 | -2.632 | H |
| HETATM | 45 | H | 0 | -3.349 | -2.109 | -3.244 | H |
| HETATM | 46 | C | 0 | -2.643 | -2.301 | 2.367  | C |
| HETATM | 47 | H | 0 | -2.831 | -1.689 | 3.265  | H |
| HETATM | 48 | H | 0 | -3.052 | -3.311 | 2.570  | H |
| HETATM | 49 | H | 0 | -1.551 | -2.388 | 2.267  | H |
| HETATM | 50 | C | 0 | -6.737 | -0.321 | 0.256  | C |
| HETATM | 51 | H | 0 | -6.747 | 0.761  | 0.493  | H |
| HETATM | 52 | H | 0 | -7.311 | -0.445 | -0.678 | H |
| HETATM | 53 | H | 0 | -7.288 | -0.825 | 1.068  | H |
| HETATM | 54 | C | 0 | 2.363  | -1.974 | -2.566 | C |
| HETATM | 55 | H | 0 | 3.117  | -1.832 | -3.357 | H |
| HETATM | 56 | H | 0 | 1.727  | -2.829 | -2.862 | H |
| HETATM | 57 | H | 0 | 1.699  | -1.088 | -2.562 | H |
| HETATM | 58 | C | 0 | 1.931  | -2.712 | 2.392  | C |
| HETATM | 59 | H | 0 | 1.218  | -3.552 | 2.295  | H |
| HETATM | 60 | H | 0 | 2.529  | -2.883 | 3.302  | H |
| HETATM | 61 | H | 0 | 1.314  | -1.806 | 2.556  | H |
| HETATM | 62 | C | 0 | 6.484  | -2.038 | 0.329  | C |
| HETATM | 63 | H | 0 | 6.851  | -2.443 | 1.287  | H |
| HETATM | 64 | H | 0 | 7.034  | -2.539 | -0.486 | H |
| HETATM | 65 | H | 0 | 6.781  | -0.972 | 0.296  | H |
| HETATM | 66 | C | 0 | -0.645 | 4.906  | 1.135  | C |
| HETATM | 67 | H | 0 | -1.176 | 5.322  | 2.009  | H |
| HETATM | 68 | H | 0 | 0.172  | 5.607  | 0.890  | H |
| HETATM | 69 | H | 0 | -1.357 | 4.884  | 0.292  | H |
| HETATM | 70 | C | 0 | 0.948  | 3.483  | 2.510  | C |
| HETATM | 71 | H | 0 | 1.827  | 4.089  | 2.223  | H |
| HETATM | 72 | H | 0 | 0.556  | 3.891  | 3.458  | H |
| HETATM | 73 | H | 0 | 1.268  | 2.446  | 2.704  | H |
| HETATM | 74 | H | 0 | -1.742 | -3.942 | -1.391 | H |
| HETATM | 75 | H | 0 | 0.629  | -4.259 | -1.460 | H |
| HETATM | 76 | C | 0 | -2.867 | 2.362  | -1.069 | C |
| HETATM | 77 | C | 0 | -3.259 | 2.065  | 0.168  | C |
| HETATM | 78 | H | 0 | -4.152 | 1.464  | 0.365  | H |
| HETATM | 79 | H | 0 | -2.662 | 2.400  | 1.019  | H |
| HETATM | 80 | F | 0 | -3.549 | 1.968  | -2.149 | F |
| HETATM | 81 | H | 0 | -1.966 | 2.926  | -1.335 | H |

END

| TITLE  | at3b.pdb |    |   |        |        |        |    |
|--------|----------|----|---|--------|--------|--------|----|
| HETATM | 1        | Ru | 0 | -0.421 | 0.246  | -0.235 | Ru |
| HETATM | 2        | C  | 0 | -0.256 | -3.791 | 1.187  | C  |
| HETATM | 3        | C  | 0 | -1.745 | -3.461 | 1.184  | C  |
| HETATM | 4        | H  | 0 | 0.148  | -3.940 | 2.207  | H  |
| HETATM | 5        | H  | 0 | -2.218 | -3.581 | 2.176  | H  |
| HETATM | 6        | C  | 0 | -0.536 | -1.597 | 0.379  | C  |
| HETATM | 7        | N  | 0 | -1.762 | -2.065 | 0.770  | N  |
| HETATM | 8        | N  | 0 | 0.355  | -2.607 | 0.578  | N  |
| HETATM | 9        | Cl | 0 | -0.553 | 1.035  | 2.048  | Cl |
| HETATM | 10       | Cl | 0 | -0.868 | -0.341 | -2.536 | Cl |
| HETATM | 11       | C  | 0 | 1.386  | 0.262  | -0.630 | C  |
| HETATM | 12       | H  | 0 | 1.787  | -0.658 | -1.092 | H  |
| HETATM | 13       | C  | 0 | 2.405  | 1.291  | -0.592 | C  |
| HETATM | 14       | C  | 0 | 2.209  | 2.641  | -0.175 | C  |
| HETATM | 15       | C  | 0 | 3.708  | 0.903  | -0.992 | C  |
| HETATM | 16       | C  | 0 | 3.301  | 3.521  | -0.161 | C  |
| HETATM | 17       | C  | 0 | 4.783  | 1.777  | -0.956 | C  |
| HETATM | 18       | H  | 0 | 3.848  | -0.133 | -1.328 | H  |
| HETATM | 19       | C  | 0 | 4.572  | 3.094  | -0.537 | C  |
| HETATM | 20       | H  | 0 | 3.153  | 4.565  | 0.125  | H  |
| HETATM | 21       | H  | 0 | 5.780  | 1.445  | -1.266 | H  |
| HETATM | 22       | H  | 0 | 5.403  | 3.808  | -0.518 | H  |
| HETATM | 23       | O  | 0 | 0.952  | 3.014  | 0.122  | O  |
| HETATM | 24       | C  | 0 | 0.650  | 4.012  | 1.136  | C  |
| HETATM | 25       | H  | 0 | -0.361 | 3.694  | 1.445  | H  |
| HETATM | 26       | C  | 0 | -2.983 | -1.367 | 0.516  | C  |
| HETATM | 27       | C  | 0 | -3.599 | -1.489 | -0.750 | C  |
| HETATM | 28       | C  | 0 | -3.597 | -0.623 | 1.546  | C  |
| HETATM | 29       | C  | 0 | -4.738 | -0.722 | -1.014 | C  |
| HETATM | 30       | C  | 0 | -4.738 | 0.127  | 1.236  | C  |
| HETATM | 31       | C  | 0 | -5.300 | 0.118  | -0.045 | C  |
| HETATM | 32       | H  | 0 | -5.201 | -0.790 | -2.007 | H  |
| HETATM | 33       | H  | 0 | -5.204 | 0.729  | 2.027  | H  |
| HETATM | 34       | C  | 0 | 1.764  | -2.588 | 0.372  | C  |
| HETATM | 35       | C  | 0 | 2.272  | -3.111 | -0.831 | C  |
| HETATM | 36       | C  | 0 | 2.618  | -2.072 | 1.364  | C  |
| HETATM | 37       | C  | 0 | 3.657  | -3.108 | -1.029 | C  |
| HETATM | 38       | C  | 0 | 3.997  | -2.084 | 1.124  | C  |
| HETATM | 39       | C  | 0 | 4.532  | -2.592 | -0.065 | C  |
| HETATM | 40       | H  | 0 | 4.060  | -3.503 | -1.971 | H  |
| HETATM | 41       | H  | 0 | 4.671  | -1.673 | 1.887  | H  |
| HETATM | 42       | C  | 0 | -3.133 | -2.493 | -1.759 | C  |
| HETATM | 43       | H  | 0 | -3.322 | -2.147 | -2.787 | H  |
| HETATM | 44       | H  | 0 | -2.056 | -2.708 | -1.688 | H  |
| HETATM | 45       | H  | 0 | -3.684 | -3.446 | -1.625 | H  |
| HETATM | 46       | C  | 0 | -3.127 | -0.699 | 2.966  | C  |
| HETATM | 47       | H  | 0 | -3.164 | 0.286  | 3.459  | H  |
| HETATM | 48       | H  | 0 | -3.786 | -1.377 | 3.545  | H  |
| HETATM | 49       | H  | 0 | -2.093 | -1.065 | 3.054  | H  |
| HETATM | 50       | C  | 0 | -6.473 | 0.990  | -0.374 | C  |
| HETATM | 51       | H  | 0 | -6.140 | 1.966  | -0.777 | H  |
| HETATM | 52       | H  | 0 | -7.123 | 0.538  | -1.143 | H  |
| HETATM | 53       | H  | 0 | -7.090 | 1.208  | 0.514  | H  |
| HETATM | 54       | C  | 0 | 1.335  | -3.559 | -1.909 | C  |
| HETATM | 55       | H  | 0 | 1.880  | -3.999 | -2.761 | H  |
| HETATM | 56       | H  | 0 | 0.603  | -4.308 | -1.555 | H  |
| HETATM | 57       | H  | 0 | 0.740  | -2.705 | -2.290 | H  |
| HETATM | 58       | C  | 0 | 2.066  | -1.463 | 2.613  | C  |
| HETATM | 59       | H  | 0 | 1.245  | -2.060 | 3.050  | H  |
| HETATM | 60       | H  | 0 | 2.847  | -1.343 | 3.382  | H  |
| HETATM | 61       | H  | 0 | 1.629  | -0.465 | 2.414  | H  |

|        |    |   |   |        |        |        |   |
|--------|----|---|---|--------|--------|--------|---|
| HETATM | 62 | C | 0 | 6.007  | -2.529 | -0.321 | C |
| HETATM | 63 | H | 0 | 6.596  | -2.758 | 0.585  | H |
| HETATM | 64 | H | 0 | 6.321  | -3.224 | -1.118 | H |
| HETATM | 65 | H | 0 | 6.310  | -1.512 | -0.641 | H |
| HETATM | 66 | C | 0 | 0.555  | 5.403  | 0.540  | C |
| HETATM | 67 | H | 0 | 0.124  | 6.093  | 1.286  | H |
| HETATM | 68 | H | 0 | 1.531  | 5.817  | 0.236  | H |
| HETATM | 69 | H | 0 | -0.109 | 5.415  | -0.341 | H |
| HETATM | 70 | C | 0 | 1.532  | 3.902  | 2.362  | C |
| HETATM | 71 | H | 0 | 2.546  | 4.312  | 2.222  | H |
| HETATM | 72 | H | 0 | 1.061  | 4.461  | 3.189  | H |
| HETATM | 73 | H | 0 | 1.612  | 2.848  | 2.676  | H |
| HETATM | 74 | H | 0 | -2.319 | -4.081 | 0.466  | H |
| HETATM | 75 | H | 0 | -0.007 | -4.697 | 0.604  | H |
| HETATM | 76 | C | 0 | -1.472 | 2.849  | -1.844 | C |
| HETATM | 77 | H | 0 | -0.556 | 3.453  | -1.828 | H |
| HETATM | 78 | C | 0 | -2.096 | 2.371  | -0.760 | C |
| HETATM | 79 | H | 0 | -3.008 | 1.767  | -0.857 | H |
| HETATM | 80 | F | 0 | -1.902 | 2.624  | -3.076 | F |
| HETATM | 81 | H | 0 | -1.752 | 2.648  | 0.241  | H |

END

### at3c.pdb

| TITLE  | at3c.pdb |    |   |        |        |        |    |
|--------|----------|----|---|--------|--------|--------|----|
| HETATM | 1        | Ru | 0 | 0.583  | 0.318  | 0.459  | Ru |
| HETATM | 2        | C  | 0 | 0.495  | -3.521 | -1.524 | C  |
| HETATM | 3        | C  | 0 | 1.963  | -3.113 | -1.570 | C  |
| HETATM | 4        | H  | 0 | 0.031  | -3.572 | -2.528 | H  |
| HETATM | 5        | H  | 0 | 2.373  | -3.076 | -2.596 | H  |
| HETATM | 6        | C  | 0 | 0.727  | -1.435 | -0.465 | C  |
| HETATM | 7        | N  | 0 | 1.943  | -1.781 | -0.976 | N  |
| HETATM | 8        | N  | 0 | -0.130 | -2.448 | -0.742 | N  |
| HETATM | 9        | Cl | 0 | 0.557  | 1.390  | -1.741 | Cl |
| HETATM | 10       | Cl | 0 | 1.067  | -0.725 | 2.596  | Cl |
| HETATM | 11       | C  | 0 | -1.233 | 0.226  | 0.844  | C  |
| HETATM | 12       | H  | 0 | -1.496 | -0.707 | 1.383  | H  |
| HETATM | 13       | C  | 0 | -2.424 | 1.036  | 0.660  | C  |
| HETATM | 14       | C  | 0 | -2.500 | 2.374  | 0.160  | C  |
| HETATM | 15       | C  | 0 | -3.645 | 0.390  | 0.981  | C  |
| HETATM | 16       | C  | 0 | -3.758 | 2.967  | -0.033 | C  |
| HETATM | 17       | C  | 0 | -4.882 | 0.980  | 0.773  | C  |
| HETATM | 18       | H  | 0 | -3.586 | -0.629 | 1.386  | H  |
| HETATM | 19       | C  | 0 | -4.932 | 2.276  | 0.256  | C  |
| HETATM | 20       | H  | 0 | -3.824 | 3.998  | -0.384 | H  |
| HETATM | 21       | H  | 0 | -5.804 | 0.440  | 1.019  | H  |
| HETATM | 22       | H  | 0 | -5.897 | 2.772  | 0.096  | H  |
| HETATM | 23       | O  | 0 | -1.345 | 3.026  | -0.018 | O  |
| HETATM | 24       | C  | 0 | -1.163 | 4.137  | -0.927 | C  |
| HETATM | 25       | H  | 0 | -0.075 | 4.078  | -1.103 | H  |
| HETATM | 26       | C  | 0 | 3.142  | -1.056 | -0.692 | C  |
| HETATM | 27       | C  | 0 | 3.832  | -1.311 | 0.514  | C  |
| HETATM | 28       | C  | 0 | 3.658  | -0.147 | -1.639 | C  |
| HETATM | 29       | C  | 0 | 4.944  | -0.523 | 0.825  | C  |
| HETATM | 30       | C  | 0 | 4.775  | 0.619  | -1.284 | C  |
| HETATM | 31       | C  | 0 | 5.408  | 0.469  | -0.047 | C  |
| HETATM | 32       | H  | 0 | 5.469  | -0.701 | 1.773  | H  |
| HETATM | 33       | H  | 0 | 5.166  | 1.347  | -2.008 | H  |
| HETATM | 34       | C  | 0 | -1.532 | -2.520 | -0.496 | C  |
| HETATM | 35       | C  | 0 | -1.983 | -3.242 | 0.627  | C  |
| HETATM | 36       | C  | 0 | -2.435 | -1.953 | -1.411 | C  |

|        |    |   |   |        |        |        |   |
|--------|----|---|---|--------|--------|--------|---|
| HETATM | 37 | C | 0 | -3.360 | -3.400 | 0.807  | C |
| HETATM | 38 | C | 0 | -3.807 | -2.137 | -1.193 | C |
| HETATM | 39 | C | 0 | -4.285 | -2.859 | -0.096 | C |
| HETATM | 40 | H | 0 | -3.720 | -3.957 | 1.683  | H |
| HETATM | 41 | H | 0 | -4.519 | -1.692 | -1.900 | H |
| HETATM | 42 | C | 0 | 3.482  | -2.473 | 1.394  | C |
| HETATM | 43 | H | 0 | 3.660  | -2.242 | 2.456  | H |
| HETATM | 44 | H | 0 | 2.429  | -2.780 | 1.310  | H |
| HETATM | 45 | H | 0 | 4.118  | -3.344 | 1.134  | H |
| HETATM | 46 | C | 0 | 3.117  | -0.061 | -3.033 | C |
| HETATM | 47 | H | 0 | 3.047  | 0.984  | -3.377 | H |
| HETATM | 48 | H | 0 | 3.796  | -0.591 | -3.731 | H |
| HETATM | 49 | H | 0 | 2.112  | -0.498 | -3.128 | H |
| HETATM | 50 | C | 0 | 6.563  | 1.344  | 0.337  | C |
| HETATM | 51 | H | 0 | 6.225  | 2.207  | 0.942  | H |
| HETATM | 52 | H | 0 | 7.305  | 0.804  | 0.950  | H |
| HETATM | 53 | H | 0 | 7.081  | 1.758  | -0.545 | H |
| HETATM | 54 | C | 0 | -1.002 | -3.764 | 1.630  | C |
| HETATM | 55 | H | 0 | -1.511 | -4.310 | 2.442  | H |
| HETATM | 56 | H | 0 | -0.260 | -4.451 | 1.181  | H |
| HETATM | 57 | H | 0 | -0.420 | -2.937 | 2.084  | H |
| HETATM | 58 | C | 0 | -1.945 | -1.130 | -2.560 | C |
| HETATM | 59 | H | 0 | -1.112 | -1.613 | -3.104 | H |
| HETATM | 60 | H | 0 | -2.751 | -0.926 | -3.284 | H |
| HETATM | 61 | H | 0 | -1.539 | -0.160 | -2.214 | H |
| HETATM | 62 | C | 0 | -5.756 | -3.014 | 0.145  | C |
| HETATM | 63 | H | 0 | -6.355 | -2.686 | -0.721 | H |
| HETATM | 64 | H | 0 | -6.031 | -4.060 | 0.371  | H |
| HETATM | 65 | H | 0 | -6.086 | -2.414 | 1.015  | H |
| HETATM | 66 | C | 0 | -1.464 | 5.459  | -0.246 | C |
| HETATM | 67 | H | 0 | -1.107 | 6.292  | -0.876 | H |
| HETATM | 68 | H | 0 | -2.540 | 5.622  | -0.065 | H |
| HETATM | 69 | H | 0 | -0.942 | 5.528  | 0.725  | H |
| HETATM | 70 | C | 0 | -1.830 | 3.941  | -2.274 | C |
| HETATM | 71 | H | 0 | -2.914 | 4.145  | -2.276 | H |
| HETATM | 72 | H | 0 | -1.368 | 4.631  | -3.001 | H |
| HETATM | 73 | H | 0 | -1.657 | 2.914  | -2.635 | H |
| HETATM | 74 | H | 0 | 2.614  | -3.786 | -0.977 | H |
| HETATM | 75 | H | 0 | 0.327  | -4.500 | -1.038 | H |
| HETATM | 76 | C | 0 | 0.661  | 2.492  | 2.159  | C |
| HETATM | 77 | H | 0 | -0.362 | 2.865  | 2.047  | H |
| HETATM | 78 | C | 0 | 1.576  | 2.435  | 1.166  | C |
| HETATM | 79 | H | 0 | 2.610  | 2.138  | 1.389  | H |
| HETATM | 80 | F | 0 | 0.948  | 2.158  | 3.404  | F |
| HETATM | 81 | H | 0 | 1.352  | 2.882  | 0.193  | H |

END

### at3d.pdb

|        |          |    |   |        |        |        |    |
|--------|----------|----|---|--------|--------|--------|----|
| TITLE  | at3d.pdb |    |   |        |        |        |    |
| HETATM | 1        | Ru | 0 | 0.648  | -0.715 | -0.192 | Ru |
| HETATM | 2        | C  | 0 | 1.079  | 3.582  | 0.459  | C  |
| HETATM | 3        | C  | 0 | 2.503  | 3.098  | 0.721  | C  |
| HETATM | 4        | H  | 0 | 0.634  | 4.110  | 1.321  | H  |
| HETATM | 5        | H  | 0 | 2.829  | 3.251  | 1.767  | H  |
| HETATM | 6        | C  | 0 | 1.163  | 1.262  | 0.145  | C  |
| HETATM | 7        | N  | 0 | 2.420  | 1.665  | 0.423  | N  |
| HETATM | 8        | N  | 0 | 0.351  | 2.335  | 0.199  | N  |
| HETATM | 9        | Cl | 0 | -0.275 | -0.691 | 2.068  | Cl |
| HETATM | 10       | Cl | 0 | 1.947  | -0.709 | -2.265 | Cl |
| HETATM | 11       | C  | 0 | -0.823 | -1.182 | -1.294 | C  |



|        |    |   |   |        |        |        |   |
|--------|----|---|---|--------|--------|--------|---|
| HETATM | 12 | H | 0 | -0.438 | -1.352 | -2.319 | H |
| HETATM | 13 | C | 0 | -2.278 | -1.161 | -1.307 | C |
| HETATM | 14 | C | 0 | -3.177 | -1.458 | -0.240 | C |
| HETATM | 15 | C | 0 | -2.833 | -0.794 | -2.556 | C |
| HETATM | 16 | C | 0 | -4.557 | -1.277 | -0.437 | C |
| HETATM | 17 | C | 0 | -4.196 | -0.616 | -2.739 | C |
| HETATM | 18 | H | 0 | -2.141 | -0.620 | -3.390 | H |
| HETATM | 19 | C | 0 | -5.056 | -0.848 | -1.664 | C |
| HETATM | 20 | H | 0 | -5.258 | -1.514 | 0.366  | H |
| HETATM | 21 | H | 0 | -4.589 | -0.306 | -3.714 | H |
| HETATM | 22 | H | 0 | -6.139 | -0.723 | -1.784 | H |
| HETATM | 23 | O | 0 | -2.637 | -2.008 | 0.849  | O |
| HETATM | 24 | C | 0 | -3.262 | -2.047 | 2.151  | C |
| HETATM | 25 | H | 0 | -2.387 | -2.282 | 2.779  | H |
| HETATM | 26 | C | 0 | 3.583  | 0.832  | 0.379  | C |
| HETATM | 27 | C | 0 | 4.399  | 0.855  | -0.768 | C |
| HETATM | 28 | C | 0 | 3.914  | 0.035  | 1.492  | C |
| HETATM | 29 | C | 0 | 5.509  | 0.009  | -0.812 | C |
| HETATM | 30 | C | 0 | 5.030  | -0.805 | 1.400  | C |
| HETATM | 31 | C | 0 | 5.828  | -0.843 | 0.251  | C |
| HETATM | 32 | H | 0 | 6.134  | 0.003  | -1.715 | H |
| HETATM | 33 | H | 0 | 5.291  | -1.434 | 2.261  | H |
| HETATM | 34 | C | 0 | -1.069 | 2.320  | 0.071  | C |
| HETATM | 35 | C | 0 | -1.646 | 2.243  | -1.209 | C |
| HETATM | 36 | C | 0 | -1.866 | 2.446  | 1.225  | C |
| HETATM | 37 | C | 0 | -3.041 | 2.276  | -1.313 | C |
| HETATM | 38 | C | 0 | -3.255 | 2.462  | 1.074  | C |
| HETATM | 39 | C | 0 | -3.860 | 2.371  | -0.185 | C |
| HETATM | 40 | H | 0 | -3.499 | 2.217  | -2.309 | H |
| HETATM | 41 | H | 0 | -3.884 | 2.537  | 1.972  | H |
| HETATM | 42 | C | 0 | 4.112  | 1.775  | -1.915 | C |
| HETATM | 43 | H | 0 | 4.451  | 1.335  | -2.867 | H |
| HETATM | 44 | H | 0 | 3.034  | 1.979  | -2.024 | H |
| HETATM | 45 | H | 0 | 4.638  | 2.743  | -1.798 | H |
| HETATM | 46 | C | 0 | 3.128  | 0.109  | 2.765  | C |
| HETATM | 47 | H | 0 | 3.054  | 1.147  | 3.142  | H |
| HETATM | 48 | H | 0 | 2.086  | -0.246 | 2.653  | H |
| HETATM | 49 | H | 0 | 3.603  | -0.494 | 3.557  | H |
| HETATM | 50 | C | 0 | 6.992  | -1.782 | 0.154  | C |
| HETATM | 51 | H | 0 | 6.722  | -2.694 | -0.411 | H |
| HETATM | 52 | H | 0 | 7.846  | -1.327 | -0.378 | H |
| HETATM | 53 | H | 0 | 7.342  | -2.110 | 1.147  | H |
| HETATM | 54 | C | 0 | -0.786 | 2.147  | -2.433 | C |
| HETATM | 55 | H | 0 | -1.395 | 2.168  | -3.351 | H |
| HETATM | 56 | H | 0 | -0.062 | 2.982  | -2.493 | H |
| HETATM | 57 | H | 0 | -0.173 | 1.223  | -2.455 | H |
| HETATM | 58 | C | 0 | -1.257 | 2.595  | 2.587  | C |
| HETATM | 59 | H | 0 | -1.129 | 3.662  | 2.861  | H |
| HETATM | 60 | H | 0 | -1.901 | 2.146  | 3.361  | H |
| HETATM | 61 | H | 0 | -0.274 | 2.101  | 2.659  | H |
| HETATM | 62 | C | 0 | -5.354 | 2.385  | -0.310 | C |
| HETATM | 63 | H | 0 | -5.815 | 1.566  | 0.274  | H |
| HETATM | 64 | H | 0 | -5.791 | 3.326  | 0.073  | H |
| HETATM | 65 | H | 0 | -5.679 | 2.266  | -1.358 | H |
| HETATM | 66 | C | 0 | -4.255 | -3.188 | 2.275  | C |
| HETATM | 67 | H | 0 | -4.504 | -3.343 | 3.339  | H |
| HETATM | 68 | H | 0 | -5.204 | -3.013 | 1.740  | H |
| HETATM | 69 | H | 0 | -3.820 | -4.129 | 1.897  | H |
| HETATM | 70 | C | 0 | -3.776 | -0.692 | 2.594  | C |
| HETATM | 71 | H | 0 | -4.720 | -0.388 | 2.108  | H |
| HETATM | 72 | H | 0 | -3.958 | -0.711 | 3.683  | H |
| HETATM | 73 | H | 0 | -3.014 | 0.078  | 2.388  | H |

|        |    |   |   |        |        |        |   |
|--------|----|---|---|--------|--------|--------|---|
| HETATM | 74 | H | 0 | 3.251  | 3.579  | 0.067  | H |
| HETATM | 75 | H | 0 | 1.002  | 4.253  | -0.417 | H |
| HETATM | 76 | C | 0 | 0.132  | -2.995 | -0.431 | C |
| HETATM | 77 | H | 0 | -0.759 | -3.239 | 0.162  | H |
| HETATM | 78 | C | 0 | 1.375  | -2.676 | 0.154  | C |
| HETATM | 79 | H | 0 | 2.279  | -2.897 | -0.432 | H |
| HETATM | 80 | H | 0 | 1.449  | -2.719 | 1.249  | H |
| HETATM | 81 | F | 0 | 0.140  | -3.604 | -1.630 | F |

END

### at3I.pdb

| TITLE  | at3I.pdb |    |   |        |        |        |    |
|--------|----------|----|---|--------|--------|--------|----|
| HETATM | 1        | Ru | 0 | 0.585  | -0.498 | -0.348 | Ru |
| HETATM | 2        | C  | 0 | 1.380  | 3.574  | 0.740  | C  |
| HETATM | 3        | C  | 0 | 2.712  | 2.920  | 1.098  | C  |
| HETATM | 4        | H  | 0 | 0.922  | 4.122  | 1.581  | H  |
| HETATM | 5        | H  | 0 | 2.917  | 2.921  | 2.187  | H  |
| HETATM | 6        | C  | 0 | 1.266  | 1.298  | 0.253  | C  |
| HETATM | 7        | N  | 0 | 2.537  | 1.544  | 0.622  | N  |
| HETATM | 8        | N  | 0 | 0.544  | 2.428  | 0.367  | N  |
| HETATM | 9        | Cl | 0 | -0.605 | -0.491 | 1.796  | Cl |
| HETATM | 10       | Cl | 0 | 1.897  | -0.436 | -2.371 | Cl |
| HETATM | 11       | C  | 0 | -0.914 | -1.347 | -1.418 | C  |
| HETATM | 12       | H  | 0 | -0.589 | -1.209 | -2.465 | H  |
| HETATM | 13       | C  | 0 | -2.371 | -1.176 | -1.322 | C  |
| HETATM | 14       | C  | 0 | -3.231 | -1.703 | -0.318 | C  |
| HETATM | 15       | C  | 0 | -2.965 | -0.466 | -2.386 | C  |
| HETATM | 16       | C  | 0 | -4.617 | -1.507 | -0.427 | C  |
| HETATM | 17       | C  | 0 | -4.333 | -0.246 | -2.468 | C  |
| HETATM | 18       | H  | 0 | -2.302 | -0.072 | -3.168 | H  |
| HETATM | 19       | C  | 0 | -5.162 | -0.777 | -1.480 | C  |
| HETATM | 20       | H  | 0 | -5.286 | -1.962 | 0.307  | H  |
| HETATM | 21       | H  | 0 | -4.754 | 0.321  | -3.306 | H  |
| HETATM | 22       | H  | 0 | -6.249 | -0.643 | -1.534 | H  |
| HETATM | 23       | O  | 0 | -2.666 | -2.445 | 0.648  | O  |
| HETATM | 24       | C  | 0 | -3.208 | -2.584 | 1.983  | C  |
| HETATM | 25       | H  | 0 | -2.285 | -2.765 | 2.561  | H  |
| HETATM | 26       | C  | 0 | 3.616  | 0.612  | 0.522  | C  |
| HETATM | 27       | C  | 0 | 4.496  | 0.698  | -0.573 | C  |
| HETATM | 28       | C  | 0 | 3.786  | -0.365 | 1.521  | C  |
| HETATM | 29       | C  | 0 | 5.519  | -0.248 | -0.679 | C  |
| HETATM | 30       | C  | 0 | 4.820  | -1.296 | 1.371  | C  |
| HETATM | 31       | C  | 0 | 5.685  | -1.261 | 0.272  | C  |
| HETATM | 32       | H  | 0 | 6.193  | -0.203 | -1.544 | H  |
| HETATM | 33       | H  | 0 | 4.954  | -2.066 | 2.142  | H  |
| HETATM | 34       | C  | 0 | -0.872 | 2.528  | 0.214  | C  |
| HETATM | 35       | C  | 0 | -1.434 | 2.524  | -1.074 | C  |
| HETATM | 36       | C  | 0 | -1.680 | 2.632  | 1.364  | C  |
| HETATM | 37       | C  | 0 | -2.827 | 2.598  | -1.194 | C  |
| HETATM | 38       | C  | 0 | -3.065 | 2.682  | 1.198  | C  |
| HETATM | 39       | C  | 0 | -3.657 | 2.653  | -0.071 | C  |
| HETATM | 40       | H  | 0 | -3.273 | 2.590  | -2.196 | H  |
| HETATM | 41       | H  | 0 | -3.703 | 2.727  | 2.091  | H  |
| HETATM | 42       | C  | 0 | 4.360  | 1.776  | -1.604 | C  |
| HETATM | 43       | H  | 0 | 4.724  | 1.429  | -2.585 | H  |
| HETATM | 44       | H  | 0 | 3.312  | 2.090  | -1.745 | H  |
| HETATM | 45       | H  | 0 | 4.954  | 2.673  | -1.337 | H  |
| HETATM | 46       | C  | 0 | 2.901  | -0.395 | 2.730  | C  |
| HETATM | 47       | H  | 0 | 2.929  | 0.565  | 3.281  | H  |
| HETATM | 48       | H  | 0 | 1.837  | -0.570 | 2.482  | H  |

|        |    |   |   |        |        |        |   |
|--------|----|---|---|--------|--------|--------|---|
| HETATM | 49 | H | 0 | 3.217  | -1.184 | 3.432  | H |
| HETATM | 50 | C | 0 | 6.755  | -2.296 | 0.103  | C |
| HETATM | 51 | H | 0 | 6.433  | -3.090 | -0.598 | H |
| HETATM | 52 | H | 0 | 7.683  | -1.869 | -0.314 | H |
| HETATM | 53 | H | 0 | 7.004  | -2.793 | 1.056  | H |
| HETATM | 54 | C | 0 | -0.563 | 2.443  | -2.291 | C |
| HETATM | 55 | H | 0 | -1.141 | 2.638  | -3.210 | H |
| HETATM | 56 | H | 0 | 0.268  | 3.172  | -2.254 | H |
| HETATM | 57 | H | 0 | -0.077 | 1.453  | -2.414 | H |
| HETATM | 58 | C | 0 | -1.086 | 2.691  | 2.739  | C |
| HETATM | 59 | H | 0 | -0.912 | 3.736  | 3.066  | H |
| HETATM | 60 | H | 0 | -1.765 | 2.235  | 3.479  | H |
| HETATM | 61 | H | 0 | -0.131 | 2.144  | 2.801  | H |
| HETATM | 62 | C | 0 | -5.149 | 2.669  | -0.210 | C |
| HETATM | 63 | H | 0 | -5.599 | 1.760  | 0.234  | H |
| HETATM | 64 | H | 0 | -5.605 | 3.531  | 0.311  | H |
| HETATM | 65 | H | 0 | -5.464 | 2.706  | -1.266 | H |
| HETATM | 66 | C | 0 | -4.089 | -3.815 | 2.080  | C |
| HETATM | 67 | H | 0 | -4.328 | -4.023 | 3.138  | H |
| HETATM | 68 | H | 0 | -5.046 | -3.699 | 1.541  | H |
| HETATM | 69 | H | 0 | -3.575 | -4.702 | 1.671  | H |
| HETATM | 70 | C | 0 | -3.843 | -1.322 | 2.539  | C |
| HETATM | 71 | H | 0 | -4.891 | -1.172 | 2.226  | H |
| HETATM | 72 | H | 0 | -3.842 | -1.385 | 3.642  | H |
| HETATM | 73 | H | 0 | -3.253 | -0.435 | 2.257  | H |
| HETATM | 74 | H | 0 | 3.575  | 3.390  | 0.596  | H |
| HETATM | 75 | H | 0 | 1.457  | 4.276  | -0.114 | H |
| HETATM | 76 | C | 0 | -0.134 | -2.605 | -0.887 | C |
| HETATM | 77 | H | 0 | -0.875 | -3.216 | -0.345 | H |
| HETATM | 78 | C | 0 | 1.058  | -2.366 | 0.079  | C |
| HETATM | 79 | H | 0 | 1.995  | -2.743 | -0.365 | H |
| HETATM | 80 | H | 0 | 0.868  | -2.682 | 1.117  | H |
| HETATM | 81 | F | 0 | 0.318  | -3.301 | -1.986 | F |

END

### at3e.pdb

|        |          |    |   |        |        |        |    |
|--------|----------|----|---|--------|--------|--------|----|
| TITLE  | at3e.pdb |    |   |        |        |        |    |
| HETATM | 1        | Ru | 0 | 0.552  | -0.651 | -0.240 | Ru |
| HETATM | 2        | Cl | 0 | 1.644  | -0.418 | -2.413 | Cl |
| HETATM | 3        | Cl | 0 | -0.452 | -0.783 | 1.976  | Cl |
| HETATM | 4        | C  | 0 | 1.198  | 1.257  | 0.191  | C  |
| HETATM | 5        | N  | 0 | 2.471  | 1.614  | 0.446  | N  |
| HETATM | 6        | C  | 0 | 2.603  | 3.038  | 0.771  | C  |
| HETATM | 7        | C  | 0 | 1.185  | 3.568  | 0.573  | C  |
| HETATM | 8        | N  | 0 | 0.421  | 2.350  | 0.284  | N  |
| HETATM | 9        | C  | 0 | 3.616  | 0.757  | 0.395  | C  |
| HETATM | 10       | C  | 0 | 4.439  | 0.771  | -0.745 | C  |
| HETATM | 11       | C  | 0 | 5.536  | -0.098 | -0.777 | C  |
| HETATM | 12       | C  | 0 | 5.832  | -0.952 | 0.290  | C  |
| HETATM | 13       | C  | 0 | 5.019  | -0.908 | 1.428  | C  |
| HETATM | 14       | C  | 0 | 3.914  | -0.054 | 1.508  | C  |
| HETATM | 15       | C  | 0 | 4.187  | 1.704  | -1.889 | C  |
| HETATM | 16       | C  | 0 | 6.985  | -1.906 | 0.207  | C  |
| HETATM | 17       | C  | 0 | 3.077  | 0.007  | 2.748  | C  |
| HETATM | 18       | C  | 0 | -1.008 | 2.372  | 0.219  | C  |
| HETATM | 19       | C  | 0 | -1.752 | 2.420  | 1.415  | C  |
| HETATM | 20       | C  | 0 | -3.145 | 2.474  | 1.323  | C  |
| HETATM | 21       | C  | 0 | -3.802 | 2.515  | 0.088  | C  |
| HETATM | 22       | C  | 0 | -3.033 | 2.501  | -1.078 | C  |
| HETATM | 23       | C  | 0 | -1.637 | 2.422  | -1.039 | C  |

|        |    |   |   |        |        |        |   |
|--------|----|---|---|--------|--------|--------|---|
| HETATM | 24 | C | 0 | -1.089 | 2.441  | 2.758  | C |
| HETATM | 25 | C | 0 | -5.298 | 2.563  | 0.026  | C |
| HETATM | 26 | C | 0 | -0.832 | 2.415  | -2.303 | C |
| HETATM | 27 | H | 0 | 3.342  | 3.512  | 0.101  | H |
| HETATM | 28 | H | 0 | 2.974  | 3.159  | 1.807  | H |
| HETATM | 29 | H | 0 | 1.099  | 4.279  | -0.270 | H |
| HETATM | 30 | H | 0 | 0.778  | 4.069  | 1.469  | H |
| HETATM | 31 | H | 0 | 6.173  | -0.110 | -1.671 | H |
| HETATM | 32 | H | 0 | 5.255  | -1.550 | 2.287  | H |
| HETATM | 33 | H | 0 | 3.118  | 1.953  | -1.997 | H |
| HETATM | 34 | H | 0 | 4.506  | 1.256  | -2.843 | H |
| HETATM | 35 | H | 0 | 4.756  | 2.648  | -1.769 | H |
| HETATM | 36 | H | 0 | 7.838  | -1.477 | -0.347 | H |
| HETATM | 37 | H | 0 | 7.342  | -2.210 | 1.205  | H |
| HETATM | 38 | H | 0 | 6.700  | -2.833 | -0.327 | H |
| HETATM | 39 | H | 0 | 2.022  | -0.272 | 2.565  | H |
| HETATM | 40 | H | 0 | 3.054  | 1.027  | 3.177  | H |
| HETATM | 41 | H | 0 | 3.471  | -0.667 | 3.527  | H |
| HETATM | 42 | H | 0 | -3.735 | 2.485  | 2.250  | H |
| HETATM | 43 | H | 0 | -3.532 | 2.548  | -2.053 | H |
| HETATM | 44 | H | 0 | -1.681 | 1.876  | 3.498  | H |
| HETATM | 45 | H | 0 | -0.086 | 1.984  | 2.740  | H |
| HETATM | 46 | H | 0 | -0.993 | 3.475  | 3.146  | H |
| HETATM | 47 | H | 0 | -5.747 | 1.646  | 0.452  | H |
| HETATM | 48 | H | 0 | -5.709 | 3.409  | 0.609  | H |
| HETATM | 49 | H | 0 | -5.664 | 2.658  | -1.010 | H |
| HETATM | 50 | H | 0 | -1.487 | 2.459  | -3.189 | H |
| HETATM | 51 | H | 0 | -0.194 | 1.514  | -2.401 | H |
| HETATM | 52 | H | 0 | -0.140 | 3.278  | -2.356 | H |
| HETATM | 53 | C | 0 | -0.788 | -1.912 | -1.384 | C |
| HETATM | 54 | C | 0 | -2.151 | -1.367 | -1.415 | C |
| HETATM | 55 | C | 0 | -3.169 | -1.608 | -0.451 | C |
| HETATM | 56 | C | 0 | -4.468 | -1.136 | -0.700 | C |
| HETATM | 57 | C | 0 | -4.763 | -0.426 | -1.862 | C |
| HETATM | 58 | C | 0 | -3.770 | -0.170 | -2.807 | C |
| HETATM | 59 | C | 0 | -2.483 | -0.638 | -2.575 | C |
| HETATM | 60 | O | 0 | -2.825 | -2.369 | 0.597  | O |
| HETATM | 61 | C | 0 | -3.516 | -2.377 | 1.865  | C |
| HETATM | 62 | C | 0 | -4.637 | -3.399 | 1.868  | C |
| HETATM | 63 | C | 0 | -3.920 | -1.001 | 2.362  | C |
| HETATM | 64 | H | 0 | -0.345 | -1.970 | -2.389 | H |
| HETATM | 65 | H | 0 | -5.272 | -1.360 | 0.004  | H |
| HETATM | 66 | H | 0 | -5.791 | -0.081 | -2.029 | H |
| HETATM | 67 | H | 0 | -3.999 | 0.387  | -3.723 | H |
| HETATM | 68 | H | 0 | -1.688 | -0.465 | -3.311 | H |
| HETATM | 69 | H | 0 | -5.023 | -3.529 | 2.895  | H |
| HETATM | 70 | H | 0 | -4.278 | -4.381 | 1.518  | H |
| HETATM | 71 | H | 0 | -5.488 | -3.102 | 1.231  | H |
| HETATM | 72 | H | 0 | -2.712 | -2.738 | 2.531  | H |
| HETATM | 73 | H | 0 | -4.870 | -0.632 | 1.937  | H |
| HETATM | 74 | H | 0 | -3.123 | -0.270 | 2.149  | H |
| HETATM | 75 | H | 0 | -4.052 | -1.044 | 3.458  | H |
| HETATM | 76 | C | 0 | -0.158 | -2.850 | -0.507 | C |
| HETATM | 77 | C | 0 | 1.644  | -2.069 | 0.219  | C |
| HETATM | 78 | F | 0 | 0.517  | -3.846 | -1.144 | F |
| HETATM | 79 | H | 0 | -0.616 | -3.195 | 0.427  | H |
| HETATM | 80 | H | 0 | 2.383  | -2.490 | -0.490 | H |
| HETATM | 81 | H | 0 | 1.651  | -2.494 | 1.244  | H |

END

| TITLE  | at3f.pdb |    |   |        |        |        |    |
|--------|----------|----|---|--------|--------|--------|----|
| HETATM | 1        | Ru | 0 | -0.495 | -0.716 | 0.249  | Ru |
| HETATM | 2        | C  | 0 | -1.180 | 3.478  | -0.398 | C  |
| HETATM | 3        | C  | 0 | -2.628 | 3.017  | -0.292 | C  |
| HETATM | 4        | H  | 0 | -0.929 | 3.887  | -1.396 | H  |
| HETATM | 5        | H  | 0 | -3.243 | 3.300  | -1.165 | H  |
| HETATM | 6        | C  | 0 | -1.217 | 1.145  | -0.101 | C  |
| HETATM | 7        | N  | 0 | -2.504 | 1.560  | -0.209 | N  |
| HETATM | 8        | N  | 0 | -0.428 | 2.243  | -0.167 | N  |
| HETATM | 9        | Cl | 0 | 0.289  | -0.960 | -2.052 | Cl |
| HETATM | 10       | Cl | 0 | -1.223 | -0.378 | 2.575  | Cl |
| HETATM | 11       | C  | 0 | 0.910  | -2.339 | 1.352  | C  |
| HETATM | 12       | C  | 0 | 2.123  | -1.522 | 1.466  | C  |
| HETATM | 13       | C  | 0 | 3.187  | -1.535 | 0.518  | C  |
| HETATM | 14       | C  | 0 | 2.292  | -0.793 | 2.660  | C  |
| HETATM | 15       | C  | 0 | 4.374  | -0.847 | 0.816  | C  |
| HETATM | 16       | C  | 0 | 3.469  | -0.109 | 2.939  | C  |
| HETATM | 17       | H  | 0 | 1.458  | -0.781 | 3.372  | H  |
| HETATM | 18       | C  | 0 | 4.511  | -0.146 | 2.013  | C  |
| HETATM | 19       | H  | 0 | 5.213  | -0.878 | 0.119  | H  |
| HETATM | 20       | H  | 0 | 3.574  | 0.448  | 3.877  | H  |
| HETATM | 21       | H  | 0 | 5.451  | 0.381  | 2.216  | H  |
| HETATM | 22       | O  | 0 | 2.985  | -2.293 | -0.570 | O  |
| HETATM | 23       | C  | 0 | 3.782  | -2.257 | -1.769 | C  |
| HETATM | 24       | H  | 0 | 3.133  | -2.827 | -2.458 | H  |
| HETATM | 25       | C  | 0 | -3.669 | 0.745  | -0.270 | C  |
| HETATM | 26       | C  | 0 | -4.517 | 0.637  | 0.847  | C  |
| HETATM | 27       | C  | 0 | -3.984 | 0.110  | -1.491 | C  |
| HETATM | 28       | C  | 0 | -5.654 | -0.172 | 0.740  | C  |
| HETATM | 29       | C  | 0 | -5.131 | -0.689 | -1.552 | C  |
| HETATM | 30       | C  | 0 | -5.968 | -0.852 | -0.442 | C  |
| HETATM | 31       | H  | 0 | -6.311 | -0.275 | 1.614  | H  |
| HETATM | 32       | H  | 0 | -5.378 | -1.190 | -2.496 | H  |
| HETATM | 33       | C  | 0 | 0.998  | 2.266  | -0.245 | C  |
| HETATM | 34       | C  | 0 | 1.746  | 2.421  | 0.941  | C  |
| HETATM | 35       | C  | 0 | 1.620  | 2.283  | -1.507 | C  |
| HETATM | 36       | C  | 0 | 3.133  | 2.552  | 0.839  | C  |
| HETATM | 37       | C  | 0 | 3.015  | 2.396  | -1.557 | C  |
| HETATM | 38       | C  | 0 | 3.785  | 2.522  | -0.399 | C  |
| HETATM | 39       | H  | 0 | 3.720  | 2.676  | 1.758  | H  |
| HETATM | 40       | H  | 0 | 3.510  | 2.385  | -2.538 | H  |
| HETATM | 41       | C  | 0 | -4.232 | 1.375  | 2.118  | C  |
| HETATM | 42       | H  | 0 | -4.667 | 0.852  | 2.986  | H  |
| HETATM | 43       | H  | 0 | -3.149 | 1.470  | 2.303  | H  |
| HETATM | 44       | H  | 0 | -4.675 | 2.391  | 2.104  | H  |
| HETATM | 45       | C  | 0 | -3.114 | 0.304  | -2.693 | C  |
| HETATM | 46       | H  | 0 | -2.948 | 1.378  | -2.908 | H  |
| HETATM | 47       | H  | 0 | -2.107 | -0.141 | -2.562 | H  |
| HETATM | 48       | H  | 0 | -3.566 | -0.150 | -3.590 | H  |
| HETATM | 49       | C  | 0 | -7.169 | -1.746 | -0.516 | C  |
| HETATM | 50       | H  | 0 | -6.902 | -2.797 | -0.296 | H  |
| HETATM | 51       | H  | 0 | -7.946 | -1.457 | 0.212  | H  |
| HETATM | 52       | H  | 0 | -7.624 | -1.742 | -1.522 | H  |
| HETATM | 53       | C  | 0 | 1.066  | 2.486  | 2.273  | C  |
| HETATM | 54       | H  | 0 | 1.803  | 2.562  | 3.090  | H  |
| HETATM | 55       | H  | 0 | 0.398  | 3.366  | 2.349  | H  |
| HETATM | 56       | H  | 0 | 0.430  | 1.602  | 2.468  | H  |
| HETATM | 57       | C  | 0 | 0.836  | 2.244  | -2.784 | C  |
| HETATM | 58       | H  | 0 | 0.730  | 3.259  | -3.217 | H  |
| HETATM | 59       | H  | 0 | 1.345  | 1.622  | -3.539 | H  |
| HETATM | 60       | H  | 0 | -0.171 | 1.817  | -2.653 | H  |
| HETATM | 61       | C  | 0 | 5.280  | 2.593  | -0.471 | C  |

|        |    |   |   |        |        |        |   |
|--------|----|---|---|--------|--------|--------|---|
| HETATM | 62 | H | 0 | 5.734  | 1.606  | -0.252 | H |
| HETATM | 63 | H | 0 | 5.635  | 2.895  | -1.471 | H |
| HETATM | 64 | H | 0 | 5.699  | 3.298  | 0.269  | H |
| HETATM | 65 | C | 0 | 5.081  | -3.027 | -1.613 | C |
| HETATM | 66 | H | 0 | 5.544  | -3.173 | -2.605 | H |
| HETATM | 67 | H | 0 | 5.821  | -2.511 | -0.979 | H |
| HETATM | 68 | H | 0 | 4.898  | -4.025 | -1.180 | H |
| HETATM | 69 | C | 0 | 3.926  | -0.864 | -2.347 | C |
| HETATM | 70 | H | 0 | 4.648  | -0.229 | -1.806 | H |
| HETATM | 71 | H | 0 | 4.275  | -0.940 | -3.393 | H |
| HETATM | 72 | H | 0 | 2.943  | -0.363 | -2.347 | H |
| HETATM | 73 | H | 0 | -3.136 | 3.406  | 0.611  | H |
| HETATM | 74 | H | 0 | -0.907 | 4.242  | 0.351  | H |
| HETATM | 75 | C | 0 | 0.459  | -3.089 | 0.301  | C |
| HETATM | 76 | C | 0 | -2.051 | -1.599 | -0.052 | C |
| HETATM | 77 | H | 0 | -2.196 | -2.201 | -0.976 | H |
| HETATM | 78 | H | 0 | -2.869 | -1.656 | 0.695  | H |
| HETATM | 79 | H | 0 | 0.373  | -2.497 | 2.296  | H |
| HETATM | 80 | F | 0 | -0.517 | -3.980 | 0.527  | F |
| HETATM | 81 | H | 0 | 0.875  | -3.160 | -0.705 | H |

END

## s2g.pdb

| TITLE  | s2g.pdb |    |   |        |        |        |    |
|--------|---------|----|---|--------|--------|--------|----|
| HETATM | 1       | Ru | 0 | -0.299 | -0.773 | -0.087 | Ru |
| HETATM | 2       | C  | 0 | 0.035  | 3.385  | 0.099  | C  |
| HETATM | 3       | C  | 0 | 1.536  | 3.101  | 0.176  | C  |
| HETATM | 4       | H  | 0 | -0.344 | 3.942  | 0.976  | H  |
| HETATM | 5       | H  | 0 | 1.984  | 3.415  | 1.138  | H  |
| HETATM | 6       | C  | 0 | 0.399  | 1.061  | 0.011  | C  |
| HETATM | 7       | N  | 0 | 1.618  | 1.642  | 0.042  | N  |
| HETATM | 8       | N  | 0 | -0.538 | 2.046  | 0.054  | N  |
| HETATM | 9       | Cl | 0 | -0.698 | -1.100 | 2.268  | Cl |
| HETATM | 10      | Cl | 0 | -0.388 | -0.744 | -2.496 | Cl |
| HETATM | 11      | C  | 0 | -2.683 | -2.553 | -0.271 | C  |
| HETATM | 12      | C  | 0 | 2.878  | 0.979  | 0.077  | C  |
| HETATM | 13      | C  | 0 | 3.616  | 0.854  | -1.116 | C  |
| HETATM | 14      | C  | 0 | 3.376  | 0.497  | 1.300  | C  |
| HETATM | 15      | C  | 0 | 4.871  | 0.243  | -1.062 | C  |
| HETATM | 16      | C  | 0 | 4.630  | -0.128 | 1.306  | C  |
| HETATM | 17      | C  | 0 | 5.389  | -0.259 | 0.139  | C  |
| HETATM | 18      | H  | 0 | 5.450  | 0.137  | -1.988 | H  |
| HETATM | 19      | H  | 0 | 5.025  | -0.513 | 2.256  | H  |
| HETATM | 20      | C  | 0 | -1.931 | 1.735  | 0.087  | C  |
| HETATM | 21      | C  | 0 | -2.654 | 1.614  | -1.121 | C  |
| HETATM | 22      | C  | 0 | -2.566 | 1.545  | 1.335  | C  |
| HETATM | 23      | C  | 0 | -3.975 | 1.156  | -1.059 | C  |
| HETATM | 24      | C  | 0 | -3.888 | 1.093  | 1.346  | C  |
| HETATM | 25      | C  | 0 | -4.593 | 0.859  | 0.159  | C  |
| HETATM | 26      | H  | 0 | -4.531 | 1.023  | -1.996 | H  |
| HETATM | 27      | H  | 0 | -4.374 | 0.907  | 2.312  | H  |
| HETATM | 28      | C  | 0 | 3.019  | 1.285  | -2.419 | C  |
| HETATM | 29      | H  | 0 | 3.740  | 1.181  | -3.246 | H  |
| HETATM | 30      | H  | 0 | 2.131  | 0.669  | -2.663 | H  |
| HETATM | 31      | H  | 0 | 2.674  | 2.335  | -2.406 | H  |
| HETATM | 32      | C  | 0 | 2.577  | 0.626  | 2.560  | C  |
| HETATM | 33      | H  | 0 | 2.179  | 1.648  | 2.698  | H  |
| HETATM | 34      | H  | 0 | 1.697  | -0.047 | 2.566  | H  |
| HETATM | 35      | H  | 0 | 3.186  | 0.381  | 3.445  | H  |
| HETATM | 36      | C  | 0 | 6.720  | -0.949 | 0.161  | C  |

|        |    |   |   |        |        |        |   |
|--------|----|---|---|--------|--------|--------|---|
| HETATM | 37 | H | 0 | 6.647  | -1.975 | -0.247 | H |
| HETATM | 38 | H | 0 | 7.467  | -0.421 | -0.457 | H |
| HETATM | 39 | H | 0 | 7.123  | -1.037 | 1.183  | H |
| HETATM | 40 | C | 0 | -2.075 | 2.046  | -2.433 | C |
| HETATM | 41 | H | 0 | -2.405 | 1.392  | -3.255 | H |
| HETATM | 42 | H | 0 | -2.413 | 3.075  | -2.672 | H |
| HETATM | 43 | H | 0 | -0.975 | 2.040  | -2.439 | H |
| HETATM | 44 | C | 0 | -1.877 | 1.885  | 2.620  | C |
| HETATM | 45 | H | 0 | -2.082 | 2.939  | 2.897  | H |
| HETATM | 46 | H | 0 | -2.232 | 1.250  | 3.446  | H |
| HETATM | 47 | H | 0 | -0.784 | 1.757  | 2.563  | H |
| HETATM | 48 | C | 0 | -5.970 | 0.272  | 0.193  | C |
| HETATM | 49 | H | 0 | -5.923 | -0.834 | 0.184  | H |
| HETATM | 50 | H | 0 | -6.521 | 0.556  | 1.106  | H |
| HETATM | 51 | H | 0 | -6.572 | 0.572  | -0.681 | H |
| HETATM | 52 | H | 0 | 2.112  | 3.594  | -0.627 | H |
| HETATM | 53 | H | 0 | -0.249 | 3.959  | -0.805 | H |
| HETATM | 54 | C | 0 | -1.462 | -3.106 | -0.331 | C |
| HETATM | 55 | H | 0 | -1.027 | -3.521 | 0.581  | H |
| HETATM | 56 | C | 0 | 1.281  | -1.675 | -0.067 | C |
| HETATM | 57 | H | 0 | -1.021 | -3.295 | -1.312 | H |
| HETATM | 58 | F | 0 | -3.380 | -2.390 | 0.820  | F |
| HETATM | 59 | F | 0 | -3.357 | -2.122 | -1.304 | F |
| HETATM | 60 | F | 0 | 2.227  | -1.690 | -0.980 | F |
| HETATM | 61 | F | 0 | 1.641  | -2.574 | 0.833  | F |

END

## s2h.pdb

| TITLE  | s2h.pdb |    |   |        |        |        |    |
|--------|---------|----|---|--------|--------|--------|----|
| HETATM | 1       | Ru | 0 | 0.202  | -0.802 | 0.007  | Ru |
| HETATM | 2       | Cl | 0 | 1.033  | -0.673 | -2.277 | Cl |
| HETATM | 3       | Cl | 0 | -0.621 | -0.865 | 2.288  | Cl |
| HETATM | 4       | C  | 0 | -0.145 | 1.220  | 0.009  | C  |
| HETATM | 5       | N  | 0 | 0.880  | 2.086  | 0.078  | N  |
| HETATM | 6       | C  | 0 | 0.433  | 3.473  | 0.215  | C  |
| HETATM | 7       | C  | 0 | -1.089 | 3.348  | 0.062  | C  |
| HETATM | 8       | N  | 0 | -1.302 | 1.896  | 0.020  | N  |
| HETATM | 9       | C  | 0 | 2.225  | 1.605  | 0.121  | C  |
| HETATM | 10      | C  | 0 | 3.005  | 1.652  | -1.055 | C  |
| HETATM | 11      | C  | 0 | 4.245  | 1.018  | -1.054 | C  |
| HETATM | 12      | C  | 0 | 4.723  | 0.336  | 0.075  | C  |
| HETATM | 13      | C  | 0 | 3.963  | 0.365  | 1.244  | C  |
| HETATM | 14      | C  | 0 | 2.719  | 1.011  | 1.301  | C  |
| HETATM | 15      | C  | 0 | -2.587 | 1.277  | -0.047 | C  |
| HETATM | 16      | C  | 0 | -3.361 | 1.157  | 1.120  | C  |
| HETATM | 17      | C  | 0 | -4.587 | 0.488  | 1.036  | C  |
| HETATM | 18      | C  | 0 | -5.051 | -0.049 | -0.170 | C  |
| HETATM | 19      | C  | 0 | -4.275 | 0.121  | -1.323 | C  |
| HETATM | 20      | C  | 0 | -3.046 | 0.787  | -1.286 | C  |
| HETATM | 21      | C  | 0 | 2.501  | 2.353  | -2.278 | C  |
| HETATM | 22      | C  | 0 | 6.001  | -0.441 | 0.010  | C  |
| HETATM | 23      | C  | 0 | 2.023  | 1.125  | 2.624  | C  |
| HETATM | 24      | C  | 0 | -2.910 | 1.739  | 2.425  | C  |
| HETATM | 25      | C  | 0 | -6.339 | -0.813 | -0.222 | C  |
| HETATM | 26      | C  | 0 | -2.240 | 0.975  | -2.535 | C  |
| HETATM | 27      | H  | 0 | 0.894  | 4.111  | -0.560 | H  |
| HETATM | 28      | H  | 0 | 0.736  | 3.872  | 1.202  | H  |
| HETATM | 29      | H  | 0 | -1.468 | 3.812  | -0.868 | H  |
| HETATM | 30      | H  | 0 | -1.647 | 3.792  | 0.906  | H  |
| HETATM | 31      | H  | 0 | 4.840  | 1.018  | -1.976 | H  |

|        |    |   |   |        |        |        |   |
|--------|----|---|---|--------|--------|--------|---|
| HETATM | 32 | H | 0 | 4.338  | -0.130 | 2.150  | H |
| HETATM | 33 | H | 0 | -5.189 | 0.372  | 1.946  | H |
| HETATM | 34 | H | 0 | -4.637 | -0.270 | -2.283 | H |
| HETATM | 35 | H | 0 | 1.430  | 2.147  | -2.447 | H |
| HETATM | 36 | H | 0 | 3.043  | 2.021  | -3.178 | H |
| HETATM | 37 | H | 0 | 2.631  | 3.451  | -2.203 | H |
| HETATM | 38 | H | 0 | 5.816  | -1.458 | -0.387 | H |
| HETATM | 39 | H | 0 | 6.464  | -0.565 | 1.003  | H |
| HETATM | 40 | H | 0 | 6.740  | 0.029  | -0.661 | H |
| HETATM | 41 | H | 0 | 2.641  | 1.725  | 3.319  | H |
| HETATM | 42 | H | 0 | 1.869  | 0.138  | 3.093  | H |
| HETATM | 43 | H | 0 | 1.030  | 1.595  | 2.560  | H |
| HETATM | 44 | H | 0 | -1.812 | 1.763  | 2.510  | H |
| HETATM | 45 | H | 0 | -3.285 | 1.145  | 3.274  | H |
| HETATM | 46 | H | 0 | -3.291 | 2.772  | 2.559  | H |
| HETATM | 47 | H | 0 | -6.169 | -1.893 | -0.048 | H |
| HETATM | 48 | H | 0 | -6.832 | -0.726 | -1.205 | H |
| HETATM | 49 | H | 0 | -7.051 | -0.478 | 0.550  | H |
| HETATM | 50 | H | 0 | -2.823 | 0.697  | -3.428 | H |
| HETATM | 51 | H | 0 | -1.313 | 0.369  | -2.542 | H |
| HETATM | 52 | H | 0 | -1.915 | 2.025  | -2.661 | H |
| HETATM | 53 | C | 0 | -1.217 | -1.903 | -0.524 | C |
| HETATM | 54 | F | 0 | -1.511 | -2.248 | -1.758 | F |
| HETATM | 55 | F | 0 | -2.190 | -2.363 | 0.225  | F |
| HETATM | 56 | C | 0 | 1.620  | -2.325 | 0.385  | C |
| HETATM | 57 | C | 0 | 0.450  | -3.051 | 0.009  | C |
| HETATM | 58 | F | 0 | 2.693  | -2.324 | -0.399 | F |
| HETATM | 59 | F | 0 | 2.035  | -2.336 | 1.653  | F |
| HETATM | 60 | H | 0 | 0.499  | -3.540 | -0.972 | H |
| HETATM | 61 | H | 0 | -0.070 | -3.572 | 0.823  | H |

END

## s2NA.pdb

| TITLE  | s2NA.pdb |    |   |        |        |        |    |
|--------|----------|----|---|--------|--------|--------|----|
| HETATM | 1        | Ru | 0 | -0.002 | -0.799 | -0.005 | Ru |
| HETATM | 2        | C  | 0 | -0.761 | 3.425  | -0.033 | C  |
| HETATM | 3        | C  | 0 | 0.768  | 3.419  | 0.089  | C  |
| HETATM | 4        | H  | 0 | -1.262 | 3.915  | 0.821  | H  |
| HETATM | 5        | H  | 0 | 1.131  | 3.884  | 1.025  | H  |
| HETATM | 6        | C  | 0 | -0.002 | 1.229  | 0.004  | C  |
| HETATM | 7        | N  | 0 | 1.097  | 1.989  | 0.078  | N  |
| HETATM | 8        | N  | 0 | -1.097 | 1.995  | -0.057 | N  |
| HETATM | 9        | Cl | 0 | -0.815 | -0.764 | 2.278  | Cl |
| HETATM | 10       | Cl | 0 | 0.814  | -0.755 | -2.287 | Cl |
| HETATM | 11       | C  | 0 | -1.281 | -2.221 | -0.428 | C  |
| HETATM | 12       | C  | 0 | 2.422  | 1.447  | 0.101  | C  |
| HETATM | 13       | C  | 0 | 3.174  | 1.410  | -1.090 | C  |
| HETATM | 14       | C  | 0 | 2.938  | 0.940  | 1.309  | C  |
| HETATM | 15       | C  | 0 | 4.422  | 0.783  | -1.066 | C  |
| HETATM | 16       | C  | 0 | 4.195  | 0.323  | 1.286  | C  |
| HETATM | 17       | C  | 0 | 4.937  | 0.216  | 0.106  | C  |
| HETATM | 18       | H  | 0 | 5.002  | 0.726  | -1.996 | H  |
| HETATM | 19       | H  | 0 | 4.600  | -0.083 | 2.221  | H  |
| HETATM | 20       | C  | 0 | -2.423 | 1.456  | -0.086 | C  |
| HETATM | 21       | C  | 0 | -2.940 | 0.974  | -1.306 | C  |
| HETATM | 22       | C  | 0 | -3.173 | 1.394  | 1.104  | C  |
| HETATM | 23       | C  | 0 | -4.191 | 0.347  | -1.293 | C  |
| HETATM | 24       | C  | 0 | -4.418 | 0.761  | 1.068  | C  |
| HETATM | 25       | C  | 0 | -4.930 | 0.212  | -0.113 | C  |
| HETATM | 26       | H  | 0 | -4.596 | -0.041 | -2.236 | H  |



|        |    |   |   |        |        |        |   |
|--------|----|---|---|--------|--------|--------|---|
| HETATM | 27 | H | 0 | -4.997 | 0.682  | 1.997  | H |
| HETATM | 28 | C | 0 | 2.675  | 2.046  | -2.351 | C |
| HETATM | 29 | H | 0 | 3.089  | 1.542  | -3.239 | H |
| HETATM | 30 | H | 0 | 1.578  | 1.999  | -2.439 | H |
| HETATM | 31 | H | 0 | 2.980  | 3.111  | -2.412 | H |
| HETATM | 32 | C | 0 | 2.185  | 1.052  | 2.598  | C |
| HETATM | 33 | H | 0 | 1.577  | 1.972  | 2.654  | H |
| HETATM | 34 | H | 0 | 1.473  | 0.217  | 2.742  | H |
| HETATM | 35 | H | 0 | 2.876  | 1.047  | 3.457  | H |
| HETATM | 36 | C | 0 | 6.247  | -0.511 | 0.090  | C |
| HETATM | 37 | H | 0 | 6.101  | -1.580 | -0.155 | H |
| HETATM | 38 | H | 0 | 6.938  | -0.105 | -0.669 | H |
| HETATM | 39 | H | 0 | 6.752  | -0.476 | 1.069  | H |
| HETATM | 40 | C | 0 | -2.189 | 1.140  | -2.591 | C |
| HETATM | 41 | H | 0 | -2.845 | 0.948  | -3.455 | H |
| HETATM | 42 | H | 0 | -1.779 | 2.161  | -2.701 | H |
| HETATM | 43 | H | 0 | -1.325 | 0.452  | -2.673 | H |
| HETATM | 44 | C | 0 | -2.679 | 2.011  | 2.376  | C |
| HETATM | 45 | H | 0 | -3.001 | 3.069  | 2.457  | H |
| HETATM | 46 | H | 0 | -3.082 | 1.483  | 3.255  | H |
| HETATM | 47 | H | 0 | -1.581 | 1.980  | 2.459  | H |
| HETATM | 48 | C | 0 | -6.233 | -0.527 | -0.110 | C |
| HETATM | 49 | H | 0 | -6.075 | -1.603 | 0.096  | H |
| HETATM | 50 | H | 0 | -6.920 | -0.154 | 0.669  | H |
| HETATM | 51 | H | 0 | -6.748 | -0.463 | -1.083 | H |
| HETATM | 52 | H | 0 | 1.271  | 3.929  | -0.752 | H |
| HETATM | 53 | H | 0 | -1.121 | 3.915  | -0.956 | H |
| HETATM | 54 | C | 0 | -0.002 | -3.040 | -0.008 | C |
| HETATM | 55 | H | 0 | -0.292 | -3.639 | 0.870  | H |
| HETATM | 56 | H | 0 | 0.286  | -3.638 | -0.888 | H |
| HETATM | 57 | C | 0 | 1.277  | -2.223 | 0.412  | C |
| HETATM | 58 | F | 0 | 2.341  | -2.465 | -0.355 | F |
| HETATM | 59 | F | 0 | 1.665  | -2.457 | 1.670  | F |
| HETATM | 60 | F | 0 | -1.666 | -2.450 | -1.687 | F |
| HETATM | 61 | F | 0 | -2.346 | -2.464 | 0.336  | F |

END

## s2i.pdb

|        |         |    |   |        |        |        |    |
|--------|---------|----|---|--------|--------|--------|----|
| TITLE  | s2i.pdb |    |   |        |        |        |    |
| HETATM | 1       | Ru | 0 | 0.202  | -0.802 | 0.007  | Ru |
| HETATM | 2       | Cl | 0 | 1.033  | -0.673 | -2.277 | Cl |
| HETATM | 3       | Cl | 0 | -0.621 | -0.865 | 2.288  | Cl |
| HETATM | 4       | C  | 0 | -0.145 | 1.220  | 0.009  | C  |
| HETATM | 5       | N  | 0 | 0.880  | 2.086  | 0.078  | N  |
| HETATM | 6       | C  | 0 | 0.433  | 3.473  | 0.215  | C  |
| HETATM | 7       | C  | 0 | -1.089 | 3.348  | 0.062  | C  |
| HETATM | 8       | N  | 0 | -1.302 | 1.896  | 0.020  | N  |
| HETATM | 9       | C  | 0 | 2.225  | 1.605  | 0.121  | C  |
| HETATM | 10      | C  | 0 | 3.005  | 1.652  | -1.055 | C  |
| HETATM | 11      | C  | 0 | 4.245  | 1.018  | -1.054 | C  |
| HETATM | 12      | C  | 0 | 4.723  | 0.336  | 0.075  | C  |
| HETATM | 13      | C  | 0 | 3.963  | 0.365  | 1.244  | C  |
| HETATM | 14      | C  | 0 | 2.719  | 1.011  | 1.301  | C  |
| HETATM | 15      | C  | 0 | -2.587 | 1.277  | -0.047 | C  |
| HETATM | 16      | C  | 0 | -3.361 | 1.157  | 1.120  | C  |
| HETATM | 17      | C  | 0 | -4.587 | 0.488  | 1.036  | C  |
| HETATM | 18      | C  | 0 | -5.051 | -0.049 | -0.170 | C  |
| HETATM | 19      | C  | 0 | -4.275 | 0.121  | -1.323 | C  |
| HETATM | 20      | C  | 0 | -3.046 | 0.787  | -1.286 | C  |
| HETATM | 21      | C  | 0 | 2.501  | 2.353  | -2.278 | C  |
| HETATM | 22      | C  | 0 | 6.001  | -0.441 | 0.010  | C  |

|        |    |   |   |        |        |        |   |
|--------|----|---|---|--------|--------|--------|---|
| HETATM | 23 | C | 0 | 2.023  | 1.125  | 2.624  | C |
| HETATM | 24 | C | 0 | -2.910 | 1.739  | 2.425  | C |
| HETATM | 25 | C | 0 | -6.339 | -0.813 | -0.222 | C |
| HETATM | 26 | C | 0 | -2.240 | 0.975  | -2.535 | C |
| HETATM | 27 | H | 0 | 0.894  | 4.111  | -0.560 | H |
| HETATM | 28 | H | 0 | 0.736  | 3.872  | 1.202  | H |
| HETATM | 29 | H | 0 | -1.468 | 3.812  | -0.868 | H |
| HETATM | 30 | H | 0 | -1.647 | 3.792  | 0.906  | H |
| HETATM | 31 | H | 0 | 4.840  | 1.018  | -1.976 | H |
| HETATM | 32 | H | 0 | 4.338  | -0.130 | 2.150  | H |
| HETATM | 33 | H | 0 | -5.189 | 0.372  | 1.946  | H |
| HETATM | 34 | H | 0 | -4.637 | -0.270 | -2.283 | H |
| HETATM | 35 | H | 0 | 1.430  | 2.147  | -2.447 | H |
| HETATM | 36 | H | 0 | 3.043  | 2.021  | -3.178 | H |
| HETATM | 37 | H | 0 | 2.631  | 3.451  | -2.203 | H |
| HETATM | 38 | H | 0 | 5.816  | -1.458 | -0.387 | H |
| HETATM | 39 | H | 0 | 6.464  | -0.565 | 1.003  | H |
| HETATM | 40 | H | 0 | 6.740  | 0.029  | -0.661 | H |
| HETATM | 41 | H | 0 | 2.641  | 1.725  | 3.319  | H |
| HETATM | 42 | H | 0 | 1.869  | 0.138  | 3.093  | H |
| HETATM | 43 | H | 0 | 1.030  | 1.595  | 2.560  | H |
| HETATM | 44 | H | 0 | -1.812 | 1.763  | 2.510  | H |
| HETATM | 45 | H | 0 | -3.285 | 1.145  | 3.274  | H |
| HETATM | 46 | H | 0 | -3.291 | 2.772  | 2.559  | H |
| HETATM | 47 | H | 0 | -6.169 | -1.893 | -0.048 | H |
| HETATM | 48 | H | 0 | -6.832 | -0.726 | -1.205 | H |
| HETATM | 49 | H | 0 | -7.051 | -0.478 | 0.550  | H |
| HETATM | 50 | H | 0 | -2.823 | 0.697  | -3.428 | H |
| HETATM | 51 | H | 0 | -1.313 | 0.369  | -2.542 | H |
| HETATM | 52 | H | 0 | -1.915 | 2.025  | -2.661 | H |
| HETATM | 53 | C | 0 | -1.217 | -1.903 | -0.524 | C |
| HETATM | 54 | F | 0 | -1.511 | -2.248 | -1.758 | F |
| HETATM | 55 | F | 0 | -2.190 | -2.363 | 0.225  | F |
| HETATM | 56 | C | 0 | 1.620  | -2.325 | 0.385  | C |
| HETATM | 57 | C | 0 | 0.450  | -3.051 | 0.009  | C |
| HETATM | 58 | F | 0 | 2.693  | -2.324 | -0.399 | F |
| HETATM | 59 | F | 0 | 2.035  | -2.336 | 1.653  | F |
| HETATM | 60 | H | 0 | 0.499  | -3.540 | -0.972 | H |
| HETATM | 61 | H | 0 | -0.070 | -3.572 | 0.823  | H |

END

## s2j.pdb

|        |         |    |   |        |        |        |    |
|--------|---------|----|---|--------|--------|--------|----|
| TITLE  | s2j.pdb |    |   |        |        |        |    |
| HETATM | 1       | Ru | 0 | -0.299 | -0.773 | -0.087 | Ru |
| HETATM | 2       | C  | 0 | 0.035  | 3.385  | 0.099  | C  |
| HETATM | 3       | C  | 0 | 1.536  | 3.101  | 0.176  | C  |
| HETATM | 4       | H  | 0 | -0.344 | 3.942  | 0.976  | H  |
| HETATM | 5       | H  | 0 | 1.984  | 3.415  | 1.138  | H  |
| HETATM | 6       | C  | 0 | 0.399  | 1.061  | 0.011  | C  |
| HETATM | 7       | N  | 0 | 1.618  | 1.642  | 0.042  | N  |
| HETATM | 8       | N  | 0 | -0.538 | 2.046  | 0.054  | N  |
| HETATM | 9       | Cl | 0 | -0.698 | -1.100 | 2.268  | Cl |
| HETATM | 10      | Cl | 0 | -0.388 | -0.744 | -2.496 | Cl |
| HETATM | 11      | C  | 0 | -2.683 | -2.553 | -0.271 | C  |
| HETATM | 12      | C  | 0 | 2.878  | 0.979  | 0.077  | C  |
| HETATM | 13      | C  | 0 | 3.616  | 0.854  | -1.116 | C  |
| HETATM | 14      | C  | 0 | 3.376  | 0.497  | 1.300  | C  |
| HETATM | 15      | C  | 0 | 4.871  | 0.243  | -1.062 | C  |
| HETATM | 16      | C  | 0 | 4.630  | -0.128 | 1.306  | C  |
| HETATM | 17      | C  | 0 | 5.389  | -0.259 | 0.139  | C  |
| HETATM | 18      | H  | 0 | 5.450  | 0.137  | -1.988 | H  |

|        |    |   |   |        |        |        |   |
|--------|----|---|---|--------|--------|--------|---|
| HETATM | 19 | H | 0 | 5.025  | -0.513 | 2.256  | H |
| HETATM | 20 | C | 0 | -1.931 | 1.735  | 0.087  | C |
| HETATM | 21 | C | 0 | -2.654 | 1.614  | -1.121 | C |
| HETATM | 22 | C | 0 | -2.566 | 1.545  | 1.335  | C |
| HETATM | 23 | C | 0 | -3.975 | 1.156  | -1.059 | C |
| HETATM | 24 | C | 0 | -3.888 | 1.093  | 1.346  | C |
| HETATM | 25 | C | 0 | -4.593 | 0.859  | 0.159  | C |
| HETATM | 26 | H | 0 | -4.531 | 1.023  | -1.996 | H |
| HETATM | 27 | H | 0 | -4.374 | 0.907  | 2.312  | H |
| HETATM | 28 | C | 0 | 3.019  | 1.285  | -2.419 | C |
| HETATM | 29 | H | 0 | 3.740  | 1.181  | -3.246 | H |
| HETATM | 30 | H | 0 | 2.131  | 0.669  | -2.663 | H |
| HETATM | 31 | H | 0 | 2.674  | 2.335  | -2.406 | H |
| HETATM | 32 | C | 0 | 2.577  | 0.626  | 2.560  | C |
| HETATM | 33 | H | 0 | 2.179  | 1.648  | 2.698  | H |
| HETATM | 34 | H | 0 | 1.697  | -0.047 | 2.566  | H |
| HETATM | 35 | H | 0 | 3.186  | 0.381  | 3.445  | H |
| HETATM | 36 | C | 0 | 6.720  | -0.949 | 0.161  | C |
| HETATM | 37 | H | 0 | 6.647  | -1.975 | -0.247 | H |
| HETATM | 38 | H | 0 | 7.467  | -0.421 | -0.457 | H |
| HETATM | 39 | H | 0 | 7.123  | -1.037 | 1.183  | H |
| HETATM | 40 | C | 0 | -2.075 | 2.046  | -2.433 | C |
| HETATM | 41 | H | 0 | -2.405 | 1.392  | -3.255 | H |
| HETATM | 42 | H | 0 | -2.413 | 3.075  | -2.672 | H |
| HETATM | 43 | H | 0 | -0.975 | 2.040  | -2.439 | H |
| HETATM | 44 | C | 0 | -1.877 | 1.885  | 2.620  | C |
| HETATM | 45 | H | 0 | -2.082 | 2.939  | 2.897  | H |
| HETATM | 46 | H | 0 | -2.232 | 1.250  | 3.446  | H |
| HETATM | 47 | H | 0 | -0.784 | 1.757  | 2.563  | H |
| HETATM | 48 | C | 0 | -5.970 | 0.272  | 0.193  | C |
| HETATM | 49 | H | 0 | -5.923 | -0.834 | 0.184  | H |
| HETATM | 50 | H | 0 | -6.521 | 0.556  | 1.106  | H |
| HETATM | 51 | H | 0 | -6.572 | 0.572  | -0.681 | H |
| HETATM | 52 | H | 0 | 2.112  | 3.594  | -0.627 | H |
| HETATM | 53 | H | 0 | -0.249 | 3.959  | -0.805 | H |
| HETATM | 54 | C | 0 | -1.462 | -3.106 | -0.331 | C |
| HETATM | 55 | H | 0 | -1.027 | -3.521 | 0.581  | H |
| HETATM | 56 | C | 0 | 1.281  | -1.675 | -0.067 | C |
| HETATM | 57 | H | 0 | -1.021 | -3.295 | -1.312 | H |
| HETATM | 58 | F | 0 | -3.380 | -2.390 | 0.820  | F |
| HETATM | 59 | F | 0 | -3.357 | -2.122 | -1.304 | F |
| HETATM | 60 | F | 0 | 2.227  | -1.690 | -0.980 | F |
| HETATM | 61 | F | 0 | 1.641  | -2.574 | 0.833  | F |

END

## a2g.pdb

|        |         |    |   |        |        |        |    |
|--------|---------|----|---|--------|--------|--------|----|
| TITLE  | a2g.pdb |    |   |        |        |        |    |
| HETATM | 1       | Ru | 0 | -0.383 | 0.750  | 0.013  | Ru |
| HETATM | 2       | C  | 0 | -0.545 | -3.446 | 0.043  | C  |
| HETATM | 3       | C  | 0 | 0.980  | -3.330 | 0.112  | C  |
| HETATM | 4       | H  | 0 | -0.897 | -3.944 | -0.881 | H  |
| HETATM | 5       | H  | 0 | 1.493  | -3.844 | -0.721 | H  |
| HETATM | 6       | C  | 0 | 0.068  | -1.176 | 0.028  | C  |
| HETATM | 7       | N  | 0 | 1.215  | -1.885 | 0.038  | N  |
| HETATM | 8       | N  | 0 | -0.970 | -2.050 | 0.062  | N  |
| HETATM | 9       | Cl | 0 | -0.573 | 0.926  | -2.399 | Cl |
| HETATM | 10      | Cl | 0 | -0.615 | 0.840  | 2.424  | Cl |
| HETATM | 11      | C  | 0 | -1.899 | 2.641  | 0.024  | C  |
| HETATM | 12      | H  | 0 | -2.394 | 2.428  | 0.976  | H  |
| HETATM | 13      | C  | 0 | 2.535  | -1.348 | 0.003  | C  |
| HETATM | 14      | C  | 0 | 3.209  | -1.086 | 1.212  | C  |

|        |    |   |   |        |        |        |   |
|--------|----|---|---|--------|--------|--------|---|
| HETATM | 15 | C | 0 | 3.148  | -1.123 | -1.243 | C |
| HETATM | 16 | C | 0 | 4.511  | -0.585 | 1.150  | C |
| HETATM | 17 | C | 0 | 4.454  | -0.622 | -1.260 | C |
| HETATM | 18 | C | 0 | 5.147  | -0.346 | -0.076 | C |
| HETATM | 19 | H | 0 | 5.040  | -0.364 | 2.086  | H |
| HETATM | 20 | H | 0 | 4.937  | -0.433 | -2.227 | H |
| HETATM | 21 | C | 0 | -2.322 | -1.593 | 0.008  | C |
| HETATM | 22 | C | 0 | -3.033 | -1.378 | 1.209  | C |
| HETATM | 23 | C | 0 | -2.931 | -1.368 | -1.247 | C |
| HETATM | 24 | C | 0 | -4.307 | -0.808 | 1.132  | C |
| HETATM | 25 | C | 0 | -4.206 | -0.795 | -1.273 | C |
| HETATM | 26 | C | 0 | -4.895 | -0.483 | -0.096 | C |
| HETATM | 27 | H | 0 | -4.857 | -0.616 | 2.063  | H |
| HETATM | 28 | H | 0 | -4.675 | -0.595 | -2.246 | H |
| HETATM | 29 | C | 0 | 2.516  | -1.283 | 2.524  | C |
| HETATM | 30 | H | 0 | 3.190  | -1.069 | 3.369  | H |
| HETATM | 31 | H | 0 | 1.635  | -0.619 | 2.619  | H |
| HETATM | 32 | H | 0 | 2.141  | -2.316 | 2.653  | H |
| HETATM | 33 | C | 0 | 2.391  | -1.353 | -2.512 | C |
| HETATM | 34 | H | 0 | 1.573  | -0.613 | -2.627 | H |
| HETATM | 35 | H | 0 | 3.047  | -1.268 | -3.394 | H |
| HETATM | 36 | H | 0 | 1.911  | -2.349 | -2.544 | H |
| HETATM | 37 | C | 0 | 6.539  | 0.209  | -0.108 | C |
| HETATM | 38 | H | 0 | 6.576  | 1.230  | 0.315  | H |
| HETATM | 39 | H | 0 | 7.236  | -0.401 | 0.494  | H |
| HETATM | 40 | H | 0 | 6.939  | 0.263  | -1.134 | H |
| HETATM | 41 | C | 0 | -2.495 | -1.828 | 2.532  | C |
| HETATM | 42 | H | 0 | -2.780 | -1.134 | 3.339  | H |
| HETATM | 43 | H | 0 | -2.907 | -2.824 | 2.790  | H |
| HETATM | 44 | H | 0 | -1.397 | -1.898 | 2.544  | H |
| HETATM | 45 | C | 0 | -2.285 | -1.821 | -2.520 | C |
| HETATM | 46 | H | 0 | -2.622 | -2.847 | -2.771 | H |
| HETATM | 47 | H | 0 | -2.558 | -1.168 | -3.364 | H |
| HETATM | 48 | H | 0 | -1.185 | -1.828 | -2.464 | H |
| HETATM | 49 | C | 0 | -6.232 | 0.192  | -0.148 | C |
| HETATM | 50 | H | 0 | -6.120 | 1.294  | -0.157 | H |
| HETATM | 51 | H | 0 | -6.795 | -0.074 | -1.059 | H |
| HETATM | 52 | H | 0 | -6.856 | -0.055 | 0.727  | H |
| HETATM | 53 | H | 0 | 1.398  | -3.736 | 1.053  | H |
| HETATM | 54 | H | 0 | -0.977 | -3.994 | 0.901  | H |
| HETATM | 55 | C | 0 | -0.813 | 3.446  | 0.034  | C |
| HETATM | 56 | C | 0 | 1.326  | 1.403  | 0.035  | C |
| HETATM | 57 | H | 0 | -2.385 | 2.439  | -0.935 | H |
| HETATM | 58 | F | 0 | 2.026  | 1.753  | 1.095  | F |
| HETATM | 59 | F | 0 | 2.058  | 1.745  | -1.004 | F |
| HETATM | 60 | F | 0 | -0.247 | 3.918  | 1.111  | F |
| HETATM | 61 | F | 0 | -0.233 | 3.930  | -1.030 | F |

END

## a2i.pdb

| TITLE  | a2i.pdb |    |   |        |        |        |    |
|--------|---------|----|---|--------|--------|--------|----|
| HETATM | 1       | Ru | 0 | 0.057  | 0.902  | 0.236  | Ru |
| HETATM | 2       | Cl | 0 | -0.844 | 0.611  | 2.429  | Cl |
| HETATM | 3       | Cl | 0 | 1.031  | 0.978  | -2.027 | Cl |
| HETATM | 4       | C  | 0 | 0.227  | -1.184 | -0.024 | C  |
| HETATM | 5       | N  | 0 | 1.376  | -1.880 | -0.050 | N  |
| HETATM | 6       | C  | 0 | 1.152  | -3.325 | -0.185 | C  |
| HETATM | 7       | C  | 0 | -0.369 | -3.428 | -0.305 | C  |
| HETATM | 8       | N  | 0 | -0.803 | -2.033 | -0.157 | N  |
| HETATM | 9       | C  | 0 | 2.685  | -1.314 | 0.028  | C  |
| HETATM | 10      | C  | 0 | 3.186  | -0.905 | 1.279  | C  |

|        |    |   |   |        |        |        |   |
|--------|----|---|---|--------|--------|--------|---|
| HETATM | 11 | C | 0 | 4.447  | -0.301 | 1.329  | C |
| HETATM | 12 | C | 0 | 5.216  | -0.117 | 0.174  | C |
| HETATM | 13 | C | 0 | 4.714  | -0.584 | -1.046 | C |
| HETATM | 14 | C | 0 | 3.456  | -1.189 | -1.142 | C |
| HETATM | 15 | C | 0 | -2.180 | -1.649 | -0.174 | C |
| HETATM | 16 | C | 0 | -2.738 | -1.141 | -1.364 | C |
| HETATM | 17 | C | 0 | -4.083 | -0.756 | -1.354 | C |
| HETATM | 18 | C | 0 | -4.870 | -0.872 | -0.204 | C |
| HETATM | 19 | C | 0 | -4.297 | -1.418 | 0.950  | C |
| HETATM | 20 | C | 0 | -2.960 | -1.821 | 0.985  | C |
| HETATM | 21 | C | 0 | 2.398  | -1.127 | 2.534  | C |
| HETATM | 22 | C | 0 | 6.543  | 0.576  | 0.238  | C |
| HETATM | 23 | C | 0 | 2.978  | -1.707 | -2.464 | C |
| HETATM | 24 | C | 0 | -1.922 | -1.023 | -2.614 | C |
| HETATM | 25 | C | 0 | -6.292 | -0.399 | -0.197 | C |
| HETATM | 26 | C | 0 | -2.392 | -2.443 | 2.225  | C |
| HETATM | 27 | H | 0 | 1.555  | -3.852 | 0.700  | H |
| HETATM | 28 | H | 0 | 1.686  | -3.713 | -1.071 | H |
| HETATM | 29 | H | 0 | -0.826 | -4.053 | 0.483  | H |
| HETATM | 30 | H | 0 | -0.705 | -3.826 | -1.280 | H |
| HETATM | 31 | H | 0 | 4.842  | 0.022  | 2.301  | H |
| HETATM | 32 | H | 0 | 5.312  | -0.463 | -1.958 | H |
| HETATM | 33 | H | 0 | -4.524 | -0.353 | -2.275 | H |
| HETATM | 34 | H | 0 | -4.906 | -1.527 | 1.857  | H |
| HETATM | 35 | H | 0 | 1.490  | -0.496 | 2.593  | H |
| HETATM | 36 | H | 0 | 3.006  | -0.909 | 3.427  | H |
| HETATM | 37 | H | 0 | 2.042  | -2.171 | 2.620  | H |
| HETATM | 38 | H | 0 | 7.015  | 0.475  | 1.230  | H |
| HETATM | 39 | H | 0 | 6.437  | 1.661  | 0.045  | H |
| HETATM | 40 | H | 0 | 7.248  | 0.191  | -0.517 | H |
| HETATM | 41 | H | 0 | 3.334  | -1.069 | -3.290 | H |
| HETATM | 42 | H | 0 | 1.879  | -1.734 | -2.532 | H |
| HETATM | 43 | H | 0 | 3.363  | -2.729 | -2.656 | H |
| HETATM | 44 | H | 0 | -1.140 | -0.243 | -2.537 | H |
| HETATM | 45 | H | 0 | -2.557 | -0.768 | -3.478 | H |
| HETATM | 46 | H | 0 | -1.390 | -1.963 | -2.854 | H |
| HETATM | 47 | H | 0 | -6.369 | 0.621  | 0.225  | H |
| HETATM | 48 | H | 0 | -6.939 | -1.044 | 0.423  | H |
| HETATM | 49 | H | 0 | -6.720 | -0.359 | -1.212 | H |
| HETATM | 50 | H | 0 | -2.880 | -2.041 | 3.128  | H |
| HETATM | 51 | H | 0 | -1.312 | -2.253 | 2.331  | H |
| HETATM | 52 | H | 0 | -2.551 | -3.540 | 2.234  | H |
| HETATM | 53 | C | 0 | -1.417 | 2.131  | -0.514 | C |
| HETATM | 54 | F | 0 | -2.584 | 1.830  | 0.067  | F |
| HETATM | 55 | F | 0 | -1.609 | 2.302  | -1.818 | F |
| HETATM | 56 | C | 0 | 1.447  | 2.071  | 0.614  | C |
| HETATM | 57 | C | 0 | -0.558 | 3.055  | 0.191  | C |
| HETATM | 58 | F | 0 | -0.995 | 3.605  | 1.315  | F |
| HETATM | 59 | F | 0 | 0.062  | 3.963  | -0.565 | F |
| HETATM | 60 | H | 0 | 1.931  | 2.788  | -0.071 | H |
| HETATM | 61 | H | 0 | 1.908  | 1.942  | 1.617  | H |

END

## a2j.pdb

|        |         |    |   |        |        |       |    |
|--------|---------|----|---|--------|--------|-------|----|
| TITLE  | a2j.pdb |    |   |        |        |       |    |
| HETATM | 1       | Ru | 0 | 0.066  | 0.660  | 0.012 | Ru |
| HETATM | 2       | C  | 0 | -0.554 | -3.469 | 0.201 | C  |
| HETATM | 3       | C  | 0 | -2.027 | -3.055 | 0.161 | C  |
| HETATM | 4       | H  | 0 | -0.291 | -4.041 | 1.111 | H  |
| HETATM | 5       | H  | 0 | -2.584 | -3.356 | 1.068 | H  |
| HETATM | 6       | C  | 0 | -0.697 | -1.118 | 0.082 | C  |

|        |    |    |   |        |        |        |    |
|--------|----|----|---|--------|--------|--------|----|
| HETATM | 7  | N  | 0 | -1.966 | -1.596 | 0.066  | N  |
| HETATM | 8  | N  | 0 | 0.143  | -2.190 | 0.182  | N  |
| HETATM | 9  | Cl | 0 | 0.590  | 0.758  | 2.315  | Cl |
| HETATM | 10 | Cl | 0 | 0.650  | 0.684  | -2.279 | Cl |
| HETATM | 11 | C  | 0 | 2.842  | 2.428  | 0.004  | C  |
| HETATM | 12 | C  | 0 | -3.158 | -0.821 | 0.012  | C  |
| HETATM | 13 | C  | 0 | -3.704 | -0.490 | -1.241 | C  |
| HETATM | 14 | C  | 0 | -3.757 | -0.391 | 1.209  | C  |
| HETATM | 15 | C  | 0 | -4.880 | 0.266  | -1.276 | C  |
| HETATM | 16 | C  | 0 | -4.933 | 0.362  | 1.132  | C  |
| HETATM | 17 | C  | 0 | -5.507 | 0.699  | -0.100 | C  |
| HETATM | 18 | H  | 0 | -5.312 | 0.531  | -2.250 | H  |
| HETATM | 19 | H  | 0 | -5.407 | 0.705  | 2.061  | H  |
| HETATM | 20 | C  | 0 | 1.562  | -2.057 | 0.078  | C  |
| HETATM | 21 | C  | 0 | 2.160  | -2.048 | -1.200 | C  |
| HETATM | 22 | C  | 0 | 2.345  | -1.929 | 1.244  | C  |
| HETATM | 23 | C  | 0 | 3.519  | -1.741 | -1.297 | C  |
| HETATM | 24 | C  | 0 | 3.702  | -1.618 | 1.099  | C  |
| HETATM | 25 | C  | 0 | 4.292  | -1.477 | -0.161 | C  |
| HETATM | 26 | H  | 0 | 3.980  | -1.689 | -2.292 | H  |
| HETATM | 27 | H  | 0 | 4.309  | -1.472 | 2.002  | H  |
| HETATM | 28 | C  | 0 | -2.993 | -0.884 | -2.499 | C  |
| HETATM | 29 | H  | 0 | -3.583 | -0.625 | -3.393 | H  |
| HETATM | 30 | H  | 0 | -2.014 | -0.371 | -2.580 | H  |
| HETATM | 31 | H  | 0 | -2.778 | -1.968 | -2.541 | H  |
| HETATM | 32 | C  | 0 | -3.102 | -0.678 | 2.525  | C  |
| HETATM | 33 | H  | 0 | -2.926 | -1.758 | 2.685  | H  |
| HETATM | 34 | H  | 0 | -2.110 | -0.190 | 2.591  | H  |
| HETATM | 35 | H  | 0 | -3.713 | -0.313 | 3.367  | H  |
| HETATM | 36 | C  | 0 | -6.749 | 1.536  | -0.165 | C  |
| HETATM | 37 | H  | 0 | -6.506 | 2.605  | -0.316 | H  |
| HETATM | 38 | H  | 0 | -7.402 | 1.242  | -1.005 | H  |
| HETATM | 39 | H  | 0 | -7.339 | 1.472  | 0.765  | H  |
| HETATM | 40 | C  | 0 | 1.386  | -2.433 | -2.424 | C  |
| HETATM | 41 | H  | 0 | 1.797  | -1.955 | -3.327 | H  |
| HETATM | 42 | H  | 0 | 1.435  | -3.529 | -2.582 | H  |
| HETATM | 43 | H  | 0 | 0.322  | -2.150 | -2.365 | H  |
| HETATM | 44 | C  | 0 | 1.783  | -2.205 | 2.604  | C  |
| HETATM | 45 | H  | 0 | 2.013  | -3.247 | 2.903  | H  |
| HETATM | 46 | H  | 0 | 2.223  | -1.542 | 3.367  | H  |
| HETATM | 47 | H  | 0 | 0.692  | -2.073 | 2.650  | H  |
| HETATM | 48 | C  | 0 | 5.717  | -1.033 | -0.291 | C  |
| HETATM | 49 | H  | 0 | 5.778  | 0.071  | -0.360 | H  |
| HETATM | 50 | H  | 0 | 6.327  | -1.330 | 0.579  | H  |
| HETATM | 51 | H  | 0 | 6.195  | -1.433 | -1.202 | H  |
| HETATM | 52 | H  | 0 | -2.572 | -3.472 | -0.707 | H  |
| HETATM | 53 | H  | 0 | -0.259 | -4.084 | -0.671 | H  |
| HETATM | 54 | C  | 0 | 1.865  | 3.342  | -0.021 | C  |
| HETATM | 55 | C  | 0 | -1.363 | 1.763  | -0.025 | C  |
| HETATM | 56 | H  | 0 | -2.445 | 1.536  | -0.027 | H  |
| HETATM | 57 | H  | 0 | -1.111 | 2.851  | -0.047 | H  |
| HETATM | 58 | F  | 0 | 1.378  | 3.851  | -1.129 | F  |
| HETATM | 59 | F  | 0 | 1.357  | 3.884  | 1.063  | F  |
| HETATM | 60 | F  | 0 | 3.397  | 1.938  | -1.076 | F  |
| HETATM | 61 | F  | 0 | 3.374  | 1.975  | 1.110  | F  |

END

## s2k.pdb

|        |         |    |   |        |        |        |    |
|--------|---------|----|---|--------|--------|--------|----|
| TITLE  | s2k.pdb |    |   |        |        |        |    |
| HETATM | 1       | Ru | 0 | 0.113  | -0.961 | -0.252 | Ru |
| HETATM | 2       | C  | 0 | -0.078 | 2.977  | 1.153  | C  |

|        |    |    |   |        |        |        |    |
|--------|----|----|---|--------|--------|--------|----|
| HETATM | 3  | C  | 0 | -1.578 | 2.693  | 1.189  | C  |
| HETATM | 4  | H  | 0 | 0.191  | 3.737  | 0.392  | H  |
| HETATM | 5  | H  | 0 | -2.175 | 3.428  | 0.621  | H  |
| HETATM | 6  | C  | 0 | -0.468 | 0.799  | 0.377  | C  |
| HETATM | 7  | N  | 0 | -1.682 | 1.369  | 0.571  | N  |
| HETATM | 8  | N  | 0 | 0.485  | 1.678  | 0.791  | N  |
| HETATM | 9  | Cl | 0 | 0.552  | -0.462 | -2.574 | Cl |
| HETATM | 10 | Cl | 0 | -0.088 | -1.873 | 1.991  | Cl |
| HETATM | 11 | C  | 0 | 2.682  | -2.473 | -0.325 | C  |
| HETATM | 12 | C  | 0 | -2.944 | 0.794  | 0.245  | C  |
| HETATM | 13 | C  | 0 | -3.716 | 0.177  | 1.248  | C  |
| HETATM | 14 | C  | 0 | -3.413 | 0.892  | -1.082 | C  |
| HETATM | 15 | C  | 0 | -4.962 | -0.353 | 0.896  | C  |
| HETATM | 16 | C  | 0 | -4.663 | 0.344  | -1.390 | C  |
| HETATM | 17 | C  | 0 | -5.447 | -0.285 | -0.416 | C  |
| HETATM | 18 | H  | 0 | -5.566 | -0.844 | 1.670  | H  |
| HETATM | 19 | H  | 0 | -5.033 | 0.416  | -2.421 | H  |
| HETATM | 20 | C  | 0 | 1.870  | 1.486  | 0.484  | C  |
| HETATM | 21 | C  | 0 | 2.732  | 0.953  | 1.467  | C  |
| HETATM | 22 | C  | 0 | 2.361  | 1.879  | -0.779 | C  |
| HETATM | 23 | C  | 0 | 4.075  | 0.748  | 1.129  | C  |
| HETATM | 24 | C  | 0 | 3.709  | 1.653  | -1.071 | C  |
| HETATM | 25 | C  | 0 | 4.574  | 1.074  | -0.137 | C  |
| HETATM | 26 | H  | 0 | 4.749  | 0.322  | 1.883  | H  |
| HETATM | 27 | H  | 0 | 4.089  | 1.934  | -2.061 | H  |
| HETATM | 28 | C  | 0 | -3.197 | 0.052  | 2.646  | C  |
| HETATM | 29 | H  | 0 | -3.863 | -0.574 | 3.262  | H  |
| HETATM | 30 | H  | 0 | -2.191 | -0.408 | 2.661  | H  |
| HETATM | 31 | H  | 0 | -3.116 | 1.032  | 3.154  | H  |
| HETATM | 32 | C  | 0 | -2.578 | 1.549  | -2.136 | C  |
| HETATM | 33 | H  | 0 | -2.221 | 2.547  | -1.819 | H  |
| HETATM | 34 | H  | 0 | -1.673 | 0.953  | -2.372 | H  |
| HETATM | 35 | H  | 0 | -3.145 | 1.676  | -3.073 | H  |
| HETATM | 36 | C  | 0 | -6.767 | -0.894 | -0.779 | C  |
| HETATM | 37 | H  | 0 | -6.639 | -1.916 | -1.185 | H  |
| HETATM | 38 | H  | 0 | -7.437 | -0.980 | 0.093  | H  |
| HETATM | 39 | H  | 0 | -7.290 | -0.312 | -1.556 | H  |
| HETATM | 40 | C  | 0 | 2.237  | 0.639  | 2.843  | C  |
| HETATM | 41 | H  | 0 | 3.071  | 0.357  | 3.508  | H  |
| HETATM | 42 | H  | 0 | 1.722  | 1.503  | 3.301  | H  |
| HETATM | 43 | H  | 0 | 1.507  | -0.193 | 2.837  | H  |
| HETATM | 44 | C  | 0 | 1.489  | 2.577  | -1.778 | C  |
| HETATM | 45 | H  | 0 | 1.551  | 3.677  | -1.656 | H  |
| HETATM | 46 | H  | 0 | 1.802  | 2.341  | -2.807 | H  |
| HETATM | 47 | H  | 0 | 0.431  | 2.282  | -1.696 | H  |
| HETATM | 48 | C  | 0 | 5.998  | 0.777  | -0.495 | C  |
| HETATM | 49 | H  | 0 | 6.087  | -0.224 | -0.958 | H  |
| HETATM | 50 | H  | 0 | 6.401  | 1.499  | -1.225 | H  |
| HETATM | 51 | H  | 0 | 6.657  | 0.777  | 0.390  | H  |
| HETATM | 52 | H  | 0 | -1.978 | 2.668  | 2.221  | H  |
| HETATM | 53 | H  | 0 | 0.322  | 3.322  | 2.122  | H  |
| HETATM | 54 | C  | 0 | 1.536  | -3.068 | -0.693 | C  |
| HETATM | 55 | H  | 0 | 1.269  | -3.082 | -1.753 | H  |
| HETATM | 56 | C  | 0 | -1.550 | -1.563 | -0.647 | C  |
| HETATM | 57 | H  | 0 | -2.238 | -1.975 | 0.121  | H  |
| HETATM | 58 | H  | 0 | -1.920 | -1.586 | -1.696 | H  |
| HETATM | 59 | H  | 0 | 0.995  | -3.667 | 0.043  | H  |
| HETATM | 60 | F  | 0 | 3.470  | -1.819 | -1.133 | F  |
| HETATM | 61 | F  | 0 | 3.167  | -2.473 | 0.885  | F  |

END

| TITLE  | s21.pdb |    |   |        |        |        |    |
|--------|---------|----|---|--------|--------|--------|----|
| HETATM | 1       | Ru | 0 | 0.154  | -0.908 | -0.130 | Ru |
| HETATM | 2       | Cl | 0 | -0.620 | -1.389 | 2.134  | Cl |
| HETATM | 3       | Cl | 0 | 0.861  | -0.602 | -2.440 | Cl |
| HETATM | 4       | C  | 0 | -0.302 | 1.027  | 0.188  | C  |
| HETATM | 5       | N  | 0 | -1.491 | 1.655  | 0.259  | N  |
| HETATM | 6       | C  | 0 | -1.346 | 3.070  | 0.621  | C  |
| HETATM | 7       | C  | 0 | 0.174  | 3.257  | 0.715  | C  |
| HETATM | 8       | N  | 0 | 0.679  | 1.905  | 0.475  | N  |
| HETATM | 9       | C  | 0 | -2.751 | 1.021  | 0.054  | C  |
| HETATM | 10      | C  | 0 | -3.546 | 0.654  | 1.155  | C  |
| HETATM | 11      | C  | 0 | -4.749 | -0.018 | 0.910  | C  |
| HETATM | 12      | C  | 0 | -5.172 | -0.325 | -0.387 | C  |
| HETATM | 13      | C  | 0 | -4.377 | 0.084  | -1.465 | C  |
| HETATM | 14      | C  | 0 | -3.171 | 0.763  | -1.268 | C  |
| HETATM | 15      | C  | 0 | 2.053  | 1.535  | 0.327  | C  |
| HETATM | 16      | C  | 0 | 2.695  | 1.746  | -0.911 | C  |
| HETATM | 17      | C  | 0 | 3.996  | 1.267  | -1.075 | C  |
| HETATM | 18      | C  | 0 | 4.666  | 0.595  | -0.047 | C  |
| HETATM | 19      | C  | 0 | 4.028  | 0.452  | 1.189  | C  |
| HETATM | 20      | C  | 0 | 2.727  | 0.921  | 1.404  | C  |
| HETATM | 21      | C  | 0 | -3.142 | 0.988  | 2.558  | C  |
| HETATM | 22      | C  | 0 | -6.440 | -1.090 | -0.618 | C  |
| HETATM | 23      | C  | 0 | -2.342 | 1.213  | -2.431 | C  |
| HETATM | 24      | C  | 0 | 2.019  | 2.485  | -2.024 | C  |
| HETATM | 25      | C  | 0 | 6.029  | 0.016  | -0.275 | C  |
| HETATM | 26      | C  | 0 | 2.090  | 0.785  | 2.754  | C  |
| HETATM | 27      | H  | 0 | -1.860 | 3.273  | 1.578  | H  |
| HETATM | 28      | H  | 0 | -1.815 | 3.710  | -0.149 | H  |
| HETATM | 29      | H  | 0 | 0.505  | 3.627  | 1.702  | H  |
| HETATM | 30      | H  | 0 | 0.568  | 3.954  | -0.049 | H  |
| HETATM | 31      | H  | 0 | -5.367 | -0.319 | 1.766  | H  |
| HETATM | 32      | H  | 0 | -4.708 | -0.121 | -2.492 | H  |
| HETATM | 33      | H  | 0 | 4.489  | 1.399  | -2.047 | H  |
| HETATM | 34      | H  | 0 | 4.556  | -0.038 | 2.018  | H  |
| HETATM | 35      | H  | 0 | -3.544 | 1.972  | 2.870  | H  |
| HETATM | 36      | H  | 0 | -2.048 | 1.006  | 2.681  | H  |
| HETATM | 37      | H  | 0 | -3.532 | 0.242  | 3.270  | H  |
| HETATM | 38      | H  | 0 | -7.177 | -0.923 | 0.186  | H  |
| HETATM | 39      | H  | 0 | -6.915 | -0.822 | -1.578 | H  |
| HETATM | 40      | H  | 0 | -6.251 | -2.180 | -0.653 | H  |
| HETATM | 41      | H  | 0 | -2.877 | 1.062  | -3.383 | H  |
| HETATM | 42      | H  | 0 | -1.379 | 0.668  | -2.499 | H  |
| HETATM | 43      | H  | 0 | -2.085 | 2.286  | -2.358 | H  |
| HETATM | 44      | H  | 0 | 0.928  | 2.326  | -2.033 | H  |
| HETATM | 45      | H  | 0 | 2.396  | 2.152  | -3.004 | H  |
| HETATM | 46      | H  | 0 | 2.203  | 3.576  | -1.953 | H  |
| HETATM | 47      | H  | 0 | 5.956  | -1.020 | -0.660 | H  |
| HETATM | 48      | H  | 0 | 6.604  | 0.590  | -1.022 | H  |
| HETATM | 49      | H  | 0 | 6.621  | -0.032 | 0.654  | H  |
| HETATM | 50      | H  | 0 | 2.854  | 0.620  | 3.531  | H  |
| HETATM | 51      | H  | 0 | 1.376  | -0.060 | 2.800  | H  |
| HETATM | 52      | H  | 0 | 1.512  | 1.685  | 3.033  | H  |
| HETATM | 53      | C  | 0 | -1.332 | -1.812 | -0.736 | C  |
| HETATM | 54      | H  | 0 | -2.094 | -2.229 | -0.043 | H  |
| HETATM | 55      | H  | 0 | -1.505 | -1.977 | -1.821 | H  |
| HETATM | 56      | C  | 0 | 1.666  | -2.583 | 0.040  | C  |
| HETATM | 57      | C  | 0 | 0.525  | -3.227 | -0.425 | C  |
| HETATM | 58      | F  | 0 | 2.066  | -2.677 | 1.299  | F  |
| HETATM | 59      | F  | 0 | 2.715  | -2.351 | -0.730 | F  |
| HETATM | 60      | H  | 0 | -0.073 | -3.792 | 0.296  | H  |



|        |    |   |   |       |        |        |   |
|--------|----|---|---|-------|--------|--------|---|
| HETATM | 61 | H | 0 | 0.484 | -3.478 | -1.489 | H |
| END    |    |   |   |       |        |        |   |

## s2PB.pdb

| TITLE  | s2PB.pdb |    |   |        |        |        |    |
|--------|----------|----|---|--------|--------|--------|----|
| HETATM | 1        | Ru | 0 | -0.033 | -0.964 | 0.195  | Ru |
| HETATM | 2        | C  | 0 | 1.145  | 3.165  | -0.193 | C  |
| HETATM | 3        | C  | 0 | -0.373 | 3.267  | -0.374 | C  |
| HETATM | 4        | H  | 0 | 1.711  | 3.551  | -1.059 | H  |
| HETATM | 5        | H  | 0 | -0.668 | 3.635  | -1.375 | H  |
| HETATM | 6        | C  | 0 | 0.213  | 1.038  | -0.035 | C  |
| HETATM | 7        | N  | 0 | -0.817 | 1.881  | -0.197 | N  |
| HETATM | 8        | N  | 0 | 1.368  | 1.722  | -0.047 | N  |
| HETATM | 9        | Cl | 0 | 1.025  | -1.351 | -1.957 | Cl |
| HETATM | 10       | Cl | 0 | -0.843 | -0.624 | 2.455  | Cl |
| HETATM | 11       | C  | 0 | 1.059  | -2.499 | 0.854  | C  |
| HETATM | 12       | H  | 0 | 1.259  | -2.474 | 1.936  | H  |
| HETATM | 13       | C  | 0 | -2.179 | 1.450  | -0.246 | C  |
| HETATM | 14       | C  | 0 | -3.002 | 1.627  | 0.883  | C  |
| HETATM | 15       | C  | 0 | -2.666 | 0.847  | -1.423 | C  |
| HETATM | 16       | C  | 0 | -4.306 | 1.126  | 0.836  | C  |
| HETATM | 17       | C  | 0 | -3.979 | 0.362  | -1.423 | C  |
| HETATM | 18       | C  | 0 | -4.803 | 0.475  | -0.299 | C  |
| HETATM | 19       | H  | 0 | -4.946 | 1.235  | 1.721  | H  |
| HETATM | 20       | H  | 0 | -4.364 | -0.117 | -2.333 | H  |
| HETATM | 21       | C  | 0 | 2.665  | 1.124  | 0.019  | C  |
| HETATM | 22       | C  | 0 | 3.175  | 0.713  | 1.264  | C  |
| HETATM | 23       | C  | 0 | 3.405  | 0.958  | -1.167 | C  |
| HETATM | 24       | C  | 0 | 4.424  | 0.082  | 1.296  | C  |
| HETATM | 25       | C  | 0 | 4.651  | 0.329  | -1.088 | C  |
| HETATM | 26       | C  | 0 | 5.167  | -0.129 | 0.129  | C  |
| HETATM | 27       | H  | 0 | 4.828  | -0.244 | 2.263  | H  |
| HETATM | 28       | H  | 0 | 5.225  | 0.176  | -2.011 | H  |
| HETATM | 29       | C  | 0 | -2.511 | 2.346  | 2.101  | C  |
| HETATM | 30       | H  | 0 | -3.031 | 1.993  | 3.006  | H  |
| HETATM | 31       | H  | 0 | -1.433 | 2.189  | 2.268  | H  |
| HETATM | 32       | H  | 0 | -2.692 | 3.437  | 2.027  | H  |
| HETATM | 33       | C  | 0 | -1.817 | 0.730  | -2.651 | C  |
| HETATM | 34       | H  | 0 | -1.209 | 1.636  | -2.826 | H  |
| HETATM | 35       | H  | 0 | -1.100 | -0.112 | -2.594 | H  |
| HETATM | 36       | H  | 0 | -2.441 | 0.566  | -3.545 | H  |
| HETATM | 37       | C  | 0 | -6.182 | -0.110 | -0.298 | C  |
| HETATM | 38       | H  | 0 | -6.176 | -1.133 | 0.124  | H  |
| HETATM | 39       | H  | 0 | -6.882 | 0.481  | 0.317  | H  |
| HETATM | 40       | H  | 0 | -6.599 | -0.188 | -1.316 | H  |
| HETATM | 41       | C  | 0 | 2.410  | 0.954  | 2.529  | C  |
| HETATM | 42       | H  | 0 | 3.030  | 0.738  | 3.414  | H  |
| HETATM | 43       | H  | 0 | 2.065  | 2.002  | 2.609  | H  |
| HETATM | 44       | H  | 0 | 1.496  | 0.331  | 2.604  | H  |
| HETATM | 45       | C  | 0 | 2.886  | 1.444  | -2.485 | C  |
| HETATM | 46       | H  | 0 | 3.153  | 2.505  | -2.665 | H  |
| HETATM | 47       | H  | 0 | 3.313  | 0.861  | -3.317 | H  |
| HETATM | 48       | H  | 0 | 1.789  | 1.348  | -2.555 | H  |
| HETATM | 49       | C  | 0 | 6.481  | -0.849 | 0.178  | C  |
| HETATM | 50       | H  | 0 | 6.350  | -1.931 | -0.015 | H  |
| HETATM | 51       | H  | 0 | 7.186  | -0.477 | -0.585 | H  |
| HETATM | 52       | H  | 0 | 6.966  | -0.759 | 1.165  | H  |
| HETATM | 53       | H  | 0 | -0.855 | 3.920  | 0.375  | H  |
| HETATM | 54       | H  | 0 | 1.510  | 3.695  | 0.706  | H  |
| HETATM | 55       | C  | 0 | -0.257 | -3.170 | 0.460  | C  |

|        |    |   |   |        |        |        |   |
|--------|----|---|---|--------|--------|--------|---|
| HETATM | 56 | H | 0 | -0.077 | -3.890 | -0.355 | H |
| HETATM | 57 | H | 0 | -0.731 | -3.613 | 1.351  | H |
| HETATM | 58 | C | 0 | -1.439 | -2.234 | -0.143 | C |
| HETATM | 59 | H | 0 | 1.920  | -2.757 | 0.220  | H |
| HETATM | 60 | F | 0 | -2.557 | -2.312 | 0.583  | F |
| HETATM | 61 | F | 0 | -1.787 | -2.586 | -1.389 | F |

END

## s2m.pdb

| TITLE  | s2m.pdb |    |   |        |        |        |    |
|--------|---------|----|---|--------|--------|--------|----|
| HETATM | 1       | Ru | 0 | 0.114  | -1.017 | 0.206  | Ru |
| HETATM | 2       | Cl | 0 | 1.115  | -1.361 | -1.977 | Cl |
| HETATM | 3       | Cl | 0 | -0.651 | -0.704 | 2.490  | Cl |
| HETATM | 4       | C  | 0 | 0.135  | 1.030  | -0.017 | C  |
| HETATM | 5       | N  | 0 | 1.252  | 1.779  | 0.000  | N  |
| HETATM | 6       | C  | 0 | 0.968  | 3.212  | -0.120 | C  |
| HETATM | 7       | C  | 0 | -0.558 | 3.249  | -0.246 | C  |
| HETATM | 8       | N  | 0 | -0.933 | 1.833  | -0.141 | N  |
| HETATM | 9       | C  | 0 | 2.569  | 1.222  | 0.016  | C  |
| HETATM | 10      | C  | 0 | 3.268  | 1.070  | -1.197 | C  |
| HETATM | 11      | C  | 0 | 4.521  | 0.454  | -1.169 | C  |
| HETATM | 12      | C  | 0 | 5.090  | -0.001 | 0.026  | C  |
| HETATM | 13      | C  | 0 | 4.394  | 0.208  | 1.222  | C  |
| HETATM | 14      | C  | 0 | 3.139  | 0.826  | 1.243  | C  |
| HETATM | 15      | C  | 0 | -2.282 | 1.370  | -0.205 | C  |
| HETATM | 16      | C  | 0 | -3.112 | 1.479  | 0.925  | C  |
| HETATM | 17      | C  | 0 | -4.417 | 0.980  | 0.840  | C  |
| HETATM | 18      | C  | 0 | -4.905 | 0.394  | -0.332 | C  |
| HETATM | 19      | C  | 0 | -4.066 | 0.330  | -1.451 | C  |
| HETATM | 20      | C  | 0 | -2.756 | 0.815  | -1.411 | C  |
| HETATM | 21      | C  | 0 | 2.698  | 1.558  | -2.494 | C  |
| HETATM | 22      | C  | 0 | 6.409  | -0.711 | 0.020  | C  |
| HETATM | 23      | C  | 0 | 2.438  | 1.080  | 2.542  | C  |
| HETATM | 24      | C  | 0 | -2.635 | 2.130  | 2.187  | C  |
| HETATM | 25      | C  | 0 | -6.288 | -0.181 | -0.382 | C  |
| HETATM | 26      | C  | 0 | -1.879 | 0.745  | -2.625 | C  |
| HETATM | 27      | H  | 0 | 1.485  | 3.630  | -1.002 | H  |
| HETATM | 28      | H  | 0 | 1.342  | 3.752  | 0.770  | H  |
| HETATM | 29      | H  | 0 | -0.905 | 3.662  | -1.211 | H  |
| HETATM | 30      | H  | 0 | -1.045 | 3.831  | 0.557  | H  |
| HETATM | 31      | H  | 0 | 5.059  | 0.308  | -2.114 | H  |
| HETATM | 32      | H  | 0 | 4.843  | -0.109 | 2.173  | H  |
| HETATM | 33      | H  | 0 | -5.065 | 1.043  | 1.724  | H  |
| HETATM | 34      | H  | 0 | -4.440 | -0.108 | -2.385 | H  |
| HETATM | 35      | H  | 0 | 3.016  | 2.598  | -2.709 | H  |
| HETATM | 36      | H  | 0 | 1.596  | 1.532  | -2.501 | H  |
| HETATM | 37      | H  | 0 | 3.039  | 0.934  | -3.335 | H  |
| HETATM | 38      | H  | 0 | 7.090  | -0.313 | -0.751 | H  |
| HETATM | 39      | H  | 0 | 6.280  | -1.788 | -0.201 | H  |
| HETATM | 40      | H  | 0 | 6.920  | -0.645 | 0.996  | H  |
| HETATM | 41      | H  | 0 | 3.105  | 0.874  | 3.395  | H  |
| HETATM | 42      | H  | 0 | 1.532  | 0.456  | 2.670  | H  |
| HETATM | 43      | H  | 0 | 2.099  | 2.129  | 2.629  | H  |
| HETATM | 44      | H  | 0 | -1.548 | 2.016  | 2.327  | H  |
| HETATM | 45      | H  | 0 | -3.119 | 1.681  | 3.070  | H  |
| HETATM | 46      | H  | 0 | -2.875 | 3.212  | 2.201  | H  |
| HETATM | 47      | H  | 0 | -6.278 | -1.265 | -0.158 | H  |
| HETATM | 48      | H  | 0 | -6.746 | -0.070 | -1.379 | H  |
| HETATM | 49      | H  | 0 | -6.958 | 0.289  | 0.358  | H  |
| HETATM | 50      | H  | 0 | -2.462 | 0.466  | -3.517 | H  |

|        |    |   |   |        |        |        |   |
|--------|----|---|---|--------|--------|--------|---|
| HETATM | 51 | H | 0 | -1.064 | 0.002  | -2.518 | H |
| HETATM | 52 | H | 0 | -1.387 | 1.713  | -2.836 | H |
| HETATM | 53 | C | 0 | 1.264  | -2.624 | 0.860  | C |
| HETATM | 54 | H | 0 | 2.138  | -2.730 | 0.201  | H |
| HETATM | 55 | H | 0 | 1.466  | -2.507 | 1.935  | H |
| HETATM | 56 | C | 0 | -1.389 | -2.046 | -0.183 | C |
| HETATM | 57 | C | 0 | 0.029  | -3.253 | 0.464  | C |
| HETATM | 58 | F | 0 | -1.738 | -2.472 | -1.387 | F |
| HETATM | 59 | F | 0 | -2.434 | -2.257 | 0.597  | F |
| HETATM | 60 | H | 0 | 0.062  | -3.851 | -0.458 | H |
| HETATM | 61 | H | 0 | -0.594 | -3.651 | 1.278  | H |

END

## s2n.pdb

| TITLE  | s2n.pdb |    |   |        |        |        |    |
|--------|---------|----|---|--------|--------|--------|----|
| HETATM | 1       | Ru | 0 | 0.390  | -0.978 | 0.190  | Ru |
| HETATM | 2       | C  | 0 | 0.591  | 3.216  | -0.114 | C  |
| HETATM | 3       | C  | 0 | -0.936 | 3.126  | -0.065 | C  |
| HETATM | 4       | H  | 0 | 0.965  | 3.594  | -1.086 | H  |
| HETATM | 5       | H  | 0 | -1.428 | 3.587  | -0.940 | H  |
| HETATM | 6       | C  | 0 | -0.052 | 0.962  | 0.041  | C  |
| HETATM | 7       | N  | 0 | -1.188 | 1.682  | -0.045 | N  |
| HETATM | 8       | N  | 0 | 0.997  | 1.825  | 0.078  | N  |
| HETATM | 9       | Cl | 0 | 0.857  | -1.384 | -2.161 | Cl |
| HETATM | 10      | Cl | 0 | 0.250  | -0.856 | 2.611  | Cl |
| HETATM | 11      | C  | 0 | 1.996  | -2.711 | 0.535  | C  |
| HETATM | 12      | C  | 0 | -2.510 | 1.151  | -0.123 | C  |
| HETATM | 13      | C  | 0 | -3.304 | 1.088  | 1.037  | C  |
| HETATM | 14      | C  | 0 | -3.000 | 0.722  | -1.371 | C  |
| HETATM | 15      | C  | 0 | -4.602 | 0.584  | 0.926  | C  |
| HETATM | 16      | C  | 0 | -4.300 | 0.208  | -1.434 | C  |
| HETATM | 17      | C  | 0 | -5.113 | 0.133  | -0.297 | C  |
| HETATM | 18      | H  | 0 | -5.227 | 0.526  | 1.827  | H  |
| HETATM | 19      | H  | 0 | -4.688 | -0.135 | -2.402 | H  |
| HETATM | 20      | C  | 0 | 2.339  | 1.341  | -0.036 | C  |
| HETATM | 21      | C  | 0 | 3.111  | 1.144  | 1.131  | C  |
| HETATM | 22      | C  | 0 | 2.882  | 1.091  | -1.316 | C  |
| HETATM | 23      | C  | 0 | 4.375  | 0.557  | 0.997  | C  |
| HETATM | 24      | C  | 0 | 4.150  | 0.508  | -1.399 | C  |
| HETATM | 25      | C  | 0 | 4.894  | 0.204  | -0.254 | C  |
| HETATM | 26      | H  | 0 | 4.975  | 0.385  | 1.900  | H  |
| HETATM | 27      | H  | 0 | 4.562  | 0.282  | -2.391 | H  |
| HETATM | 28      | C  | 0 | -2.742 | 1.477  | 2.369  | C  |
| HETATM | 29      | H  | 0 | -3.487 | 1.344  | 3.170  | H  |
| HETATM | 30      | H  | 0 | -1.857 | 0.862  | 2.623  | H  |
| HETATM | 31      | H  | 0 | -2.413 | 2.533  | 2.401  | H  |
| HETATM | 32      | C  | 0 | -2.139 | 0.787  | -2.594 | C  |
| HETATM | 33      | H  | 0 | -1.658 | 1.776  | -2.712 | H  |
| HETATM | 34      | H  | 0 | -1.315 | 0.046  | -2.560 | H  |
| HETATM | 35      | H  | 0 | -2.725 | 0.588  | -3.506 | H  |
| HETATM | 36      | C  | 0 | -6.493 | -0.447 | -0.380 | C  |
| HETATM | 37      | H  | 0 | -6.482 | -1.537 | -0.188 | H  |
| HETATM | 38      | H  | 0 | -7.173 | -0.002 | 0.366  | H  |
| HETATM | 39      | H  | 0 | -6.941 | -0.307 | -1.379 | H  |
| HETATM | 40      | C  | 0 | 2.625  | 1.608  | 2.468  | C  |
| HETATM | 41      | H  | 0 | 3.378  | 1.416  | 3.249  | H  |
| HETATM | 42      | H  | 0 | 2.421  | 2.695  | 2.464  | H  |
| HETATM | 43      | H  | 0 | 1.692  | 1.098  | 2.767  | H  |
| HETATM | 44      | C  | 0 | 2.164  | 1.507  | -2.563 | C  |
| HETATM | 45      | H  | 0 | 2.432  | 2.549  | -2.833 | H  |
| HETATM | 46      | H  | 0 | 2.439  | 0.864  | -3.414 | H  |

|        |    |   |   |        |        |        |   |
|--------|----|---|---|--------|--------|--------|---|
| HETATM | 47 | H | 0 | 1.069  | 1.451  | -2.465 | H |
| HETATM | 48 | C | 0 | 6.218  | -0.488 | -0.366 | C |
| HETATM | 49 | H | 0 | 6.089  | -1.588 | -0.380 | H |
| HETATM | 50 | H | 0 | 6.748  | -0.223 | -1.297 | H |
| HETATM | 51 | H | 0 | 6.880  | -0.257 | 0.485  | H |
| HETATM | 52 | H | 0 | -1.361 | 3.601  | 0.839  | H |
| HETATM | 53 | H | 0 | 1.012  | 3.863  | 0.676  | H |
| HETATM | 54 | C | 0 | 0.831  | -3.410 | 0.473  | C |
| HETATM | 55 | H | 0 | 0.475  | -3.829 | -0.477 | H |
| HETATM | 56 | C | 0 | -1.306 | -1.665 | 0.057  | C |
| HETATM | 57 | H | 0 | 2.409  | -2.394 | 1.502  | H |
| HETATM | 58 | H | 0 | 0.279  | -3.671 | 1.386  | H |
| HETATM | 59 | H | 0 | 2.610  | -2.560 | -0.363 | H |
| HETATM | 60 | F | 0 | -1.805 | -2.337 | -0.960 | F |
| HETATM | 61 | F | 0 | -2.237 | -1.680 | 0.983  | F |

END

## a2k.pdb

| TITLE  | a2k.pdb |    |   |        |        |        |    |
|--------|---------|----|---|--------|--------|--------|----|
| HETATM | 1       | Ru | 0 | -0.264 | 0.867  | 0.062  | Ru |
| HETATM | 2       | C  | 0 | -0.350 | -3.333 | 0.224  | C  |
| HETATM | 3       | C  | 0 | 1.169  | -3.180 | 0.310  | C  |
| HETATM | 4       | H  | 0 | -0.676 | -3.814 | -0.719 | H  |
| HETATM | 5       | H  | 0 | 1.708  | -3.735 | -0.478 | H  |
| HETATM | 6       | C  | 0 | 0.203  | -1.053 | 0.140  | C  |
| HETATM | 7       | N  | 0 | 1.370  | -1.737 | 0.143  | N  |
| HETATM | 8       | N  | 0 | -0.812 | -1.949 | 0.272  | N  |
| HETATM | 9       | Cl | 0 | -0.679 | 1.061  | -2.320 | Cl |
| HETATM | 10      | Cl | 0 | -0.141 | 0.978  | 2.489  | Cl |
| HETATM | 11      | C  | 0 | -1.852 | 2.709  | 0.180  | C  |
| HETATM | 12      | C  | 0 | 2.673  | -1.181 | -0.006 | C  |
| HETATM | 13      | C  | 0 | 3.462  | -0.932 | 1.133  | C  |
| HETATM | 14      | C  | 0 | 3.152  | -0.903 | -1.302 | C  |
| HETATM | 15      | C  | 0 | 4.741  | -0.395 | 0.951  | C  |
| HETATM | 16      | C  | 0 | 4.436  | -0.364 | -1.437 | C  |
| HETATM | 17      | C  | 0 | 5.241  | -0.101 | -0.323 | C  |
| HETATM | 18      | H  | 0 | 5.359  | -0.189 | 1.835  | H  |
| HETATM | 19      | H  | 0 | 4.815  | -0.145 | -2.444 | H  |
| HETATM | 20      | C  | 0 | -2.178 | -1.561 | 0.095  | C  |
| HETATM | 21      | C  | 0 | -2.983 | -1.314 | 1.230  | C  |
| HETATM | 22      | C  | 0 | -2.712 | -1.470 | -1.208 | C  |
| HETATM | 23      | C  | 0 | -4.291 | -0.861 | 1.029  | C  |
| HETATM | 24      | C  | 0 | -4.027 | -1.017 | -1.359 | C  |
| HETATM | 25      | C  | 0 | -4.821 | -0.686 | -0.256 | C  |
| HETATM | 26      | H  | 0 | -4.919 | -0.657 | 1.905  | H  |
| HETATM | 27      | H  | 0 | -4.441 | -0.925 | -2.371 | H  |
| HETATM | 28      | C  | 0 | 2.918  | -1.178 | 2.506  | C  |
| HETATM | 29      | H  | 0 | 3.621  | -0.830 | 3.280  | H  |
| HETATM | 30      | H  | 0 | 1.958  | -0.646 | 2.655  | H  |
| HETATM | 31      | H  | 0 | 2.725  | -2.250 | 2.700  | H  |
| HETATM | 32      | C  | 0 | 2.290  | -1.155 | -2.499 | C  |
| HETATM | 33      | H  | 0 | 1.878  | -2.182 | -2.507 | H  |
| HETATM | 34      | H  | 0 | 1.419  | -0.469 | -2.523 | H  |
| HETATM | 35      | H  | 0 | 2.853  | -1.012 | -3.435 | H  |
| HETATM | 36      | C  | 0 | 6.599  | 0.512  | -0.491 | C  |
| HETATM | 37      | H  | 0 | 6.536  | 1.616  | -0.542 | H  |
| HETATM | 38      | H  | 0 | 7.269  | 0.270  | 0.350  | H  |
| HETATM | 39      | H  | 0 | 7.087  | 0.182  | -1.424 | H  |
| HETATM | 40      | C  | 0 | -2.475 | -1.589 | 2.609  | C  |
| HETATM | 41      | H  | 0 | -3.237 | -1.345 | 3.367  | H  |
| HETATM | 42      | H  | 0 | -2.214 | -2.656 | 2.737  | H  |

|        |    |   |   |        |        |        |   |
|--------|----|---|---|--------|--------|--------|---|
| HETATM | 43 | H | 0 | -1.570 | -0.999 | 2.837  | H |
| HETATM | 44 | C | 0 | -1.937 | -1.922 | -2.408 | C |
| HETATM | 45 | H | 0 | -2.142 | -2.991 | -2.620 | H |
| HETATM | 46 | H | 0 | -2.219 | -1.347 | -3.303 | H |
| HETATM | 47 | H | 0 | -0.849 | -1.801 | -2.286 | H |
| HETATM | 48 | C | 0 | -6.210 | -0.156 | -0.444 | C |
| HETATM | 49 | H | 0 | -6.208 | 0.946  | -0.544 | H |
| HETATM | 50 | H | 0 | -6.683 | -0.553 | -1.358 | H |
| HETATM | 51 | H | 0 | -6.863 | -0.395 | 0.413  | H |
| HETATM | 52 | H | 0 | 1.574  | -3.514 | 1.284  | H |
| HETATM | 53 | H | 0 | -0.774 | -3.919 | 1.058  | H |
| HETATM | 54 | C | 0 | -0.834 | 3.595  | 0.114  | C |
| HETATM | 55 | C | 0 | 1.422  | 1.520  | -0.107 | C |
| HETATM | 56 | H | 0 | 2.195  | 1.427  | 0.684  | H |
| HETATM | 57 | H | 0 | 1.717  | 2.104  | -1.008 | H |
| HETATM | 58 | H | 0 | -2.265 | 2.471  | 1.164  | H |
| HETATM | 59 | H | 0 | -2.394 | 2.472  | -0.739 | H |
| HETATM | 60 | F | 0 | -0.368 | 4.112  | -0.988 | F |
| HETATM | 61 | F | 0 | -0.230 | 4.111  | 1.149  | F |

END

### a2l.pdb

| TITLE  | a2l.pdb |    |   |        |        |        |    |
|--------|---------|----|---|--------|--------|--------|----|
| HETATM | 1       | Ru | 0 | -0.119 | 0.897  | 0.039  | Ru |
| HETATM | 2       | Cl | 0 | -0.993 | 0.983  | -2.224 | Cl |
| HETATM | 3       | Cl | 0 | 0.667  | 0.910  | 2.338  | Cl |
| HETATM | 4       | C  | 0 | 0.065  | -1.129 | 0.026  | C  |
| HETATM | 5       | N  | 0 | -0.997 | -1.945 | 0.162  | N  |
| HETATM | 6       | C  | 0 | -0.617 | -3.361 | 0.158  | C  |
| HETATM | 7       | C  | 0 | 0.908  | -3.304 | 0.026  | C  |
| HETATM | 8       | N  | 0 | 1.186  | -1.865 | -0.047 | N  |
| HETATM | 9       | C  | 0 | -2.342 | -1.461 | 0.140  | C  |
| HETATM | 10      | C  | 0 | -3.047 | -1.427 | -1.080 | C  |
| HETATM | 11      | C  | 0 | -4.329 | -0.872 | -1.091 | C  |
| HETATM | 12      | C  | 0 | -4.922 | -0.367 | 0.073  | C  |
| HETATM | 13      | C  | 0 | -4.220 | -0.464 | 1.279  | C  |
| HETATM | 14      | C  | 0 | -2.935 | -1.016 | 1.339  | C  |
| HETATM | 15      | C  | 0 | 2.505  | -1.327 | -0.137 | C  |
| HETATM | 16      | C  | 0 | 3.312  | -1.262 | 1.012  | C  |
| HETATM | 17      | C  | 0 | 4.582  | -0.686 | 0.898  | C  |
| HETATM | 18      | C  | 0 | 5.058  | -0.188 | -0.319 | C  |
| HETATM | 19      | C  | 0 | 4.243  | -0.296 | -1.453 | C  |
| HETATM | 20      | C  | 0 | 2.968  | -0.865 | -1.385 | C  |
| HETATM | 21      | C  | 0 | -2.462 | -1.996 | -2.337 | C  |
| HETATM | 22      | C  | 0 | -6.278 | 0.269  | 0.019  | C  |
| HETATM | 23      | C  | 0 | -2.229 | -1.152 | 2.653  | C  |
| HETATM | 24      | C  | 0 | 2.852  | -1.813 | 2.327  | C  |
| HETATM | 25      | C  | 0 | 6.404  | 0.467  | -0.405 | C  |
| HETATM | 26      | C  | 0 | 2.111  | -0.975 | -2.608 | C  |
| HETATM | 27      | H  | 0 | -1.105 | -3.881 | -0.688 | H  |
| HETATM | 28      | H  | 0 | -0.956 | -3.854 | 1.088  | H  |
| HETATM | 29      | H  | 0 | 1.285  | -3.810 | -0.882 | H  |
| HETATM | 30      | H  | 0 | 1.430  | -3.748 | 0.894  | H  |
| HETATM | 31      | H  | 0 | -4.873 | -0.819 | -2.043 | H  |
| HETATM | 32      | H  | 0 | -4.687 | -0.109 | 2.207  | H  |
| HETATM | 33      | H  | 0 | 5.213  | -0.617 | 1.794  | H  |
| HETATM | 34      | H  | 0 | 4.611  | 0.067  | -2.422 | H  |
| HETATM | 35      | H  | 0 | -2.738 | -3.063 | -2.458 | H  |
| HETATM | 36      | H  | 0 | -1.363 | -1.923 | -2.359 | H  |
| HETATM | 37      | H  | 0 | -2.834 | -1.459 | -3.224 | H  |
| HETATM | 38      | H  | 0 | -6.969 | -0.289 | -0.636 | H  |

|        |    |   |   |        |        |        |   |
|--------|----|---|---|--------|--------|--------|---|
| HETATM | 39 | H | 0 | -6.221 | 1.295  | -0.389 | H |
| HETATM | 40 | H | 0 | -6.739 | 0.344  | 1.018  | H |
| HETATM | 41 | H | 0 | -2.914 | -0.940 | 3.491  | H |
| HETATM | 42 | H | 0 | -1.365 | -0.465 | 2.745  | H |
| HETATM | 43 | H | 0 | -1.827 | -2.171 | 2.801  | H |
| HETATM | 44 | H | 0 | 1.760  | -1.729 | 2.455  | H |
| HETATM | 45 | H | 0 | 3.315  | -1.269 | 3.167  | H |
| HETATM | 46 | H | 0 | 3.134  | -2.879 | 2.440  | H |
| HETATM | 47 | H | 0 | 7.104  | 0.074  | 0.351  | H |
| HETATM | 48 | H | 0 | 6.329  | 1.557  | -0.230 | H |
| HETATM | 49 | H | 0 | 6.864  | 0.338  | -1.399 | H |
| HETATM | 50 | H | 0 | 2.692  | -0.766 | -3.521 | H |
| HETATM | 51 | H | 0 | 1.256  | -0.269 | -2.590 | H |
| HETATM | 52 | H | 0 | 1.669  | -1.984 | -2.715 | H |
| HETATM | 53 | C | 0 | 1.325  | 1.953  | -0.430 | C |
| HETATM | 54 | H | 0 | 1.482  | 2.256  | -1.484 | H |
| HETATM | 55 | H | 0 | 2.095  | 2.249  | 0.309  | H |
| HETATM | 56 | C | 0 | -1.435 | 2.495  | 0.499  | C |
| HETATM | 57 | H | 0 | -2.261 | 2.462  | -0.223 | H |
| HETATM | 58 | H | 0 | -1.657 | 2.438  | 1.572  | H |
| HETATM | 59 | C | 0 | -0.306 | 3.269  | 0.130  | C |
| HETATM | 60 | F | 0 | -0.321 | 3.960  | -1.000 | F |
| HETATM | 61 | F | 0 | 0.370  | 3.933  | 1.055  | F |

END

### a2NB.pdb

| TITLE  | a2NB.pdb |    |   |        |        |        |    |
|--------|----------|----|---|--------|--------|--------|----|
| HETATM | 1        | Ru | 0 | 0.223  | 0.833  | 0.151  | Ru |
| HETATM | 2        | C  | 0 | 0.384  | -3.334 | -0.401 | C  |
| HETATM | 3        | C  | 0 | -1.067 | -3.229 | 0.067  | C  |
| HETATM | 4        | H  | 0 | 0.988  | -4.031 | 0.204  | H  |
| HETATM | 5        | H  | 0 | -1.220 | -3.631 | 1.089  | H  |
| HETATM | 6        | C  | 0 | -0.153 | -1.105 | -0.033 | C  |
| HETATM | 7        | N  | 0 | -1.311 | -1.781 | 0.066  | N  |
| HETATM | 8        | N  | 0 | 0.863  | -1.960 | -0.238 | N  |
| HETATM | 9        | Cl | 0 | 1.322  | 1.215  | 2.197  | Cl |
| HETATM | 10       | Cl | 0 | -0.927 | 0.610  | -2.058 | Cl |
| HETATM | 11       | C  | 0 | 1.387  | 2.118  | -0.911 | C  |
| HETATM | 12       | H  | 0 | 1.401  | 1.979  | -2.001 | H  |
| HETATM | 13       | C  | 0 | -2.608 | -1.201 | 0.203  | C  |
| HETATM | 14       | C  | 0 | -3.532 | -1.324 | -0.852 | C  |
| HETATM | 15       | C  | 0 | -2.943 | -0.520 | 1.386  | C  |
| HETATM | 16       | C  | 0 | -4.789 | -0.731 | -0.706 | C  |
| HETATM | 17       | C  | 0 | -4.209 | 0.069  | 1.486  | C  |
| HETATM | 18       | C  | 0 | -5.140 | -0.021 | 0.448  | C  |
| HETATM | 19       | H  | 0 | -5.508 | -0.809 | -1.531 | H  |
| HETATM | 20       | H  | 0 | -4.473 | 0.602  | 2.408  | H  |
| HETATM | 21       | C  | 0 | 2.231  | -1.541 | -0.178 | C  |
| HETATM | 22       | C  | 0 | 2.883  | -1.099 | -1.347 | C  |
| HETATM | 23       | C  | 0 | 2.890  | -1.567 | 1.066  | C  |
| HETATM | 24       | C  | 0 | 4.198  | -0.635 | -1.232 | C  |
| HETATM | 25       | C  | 0 | 4.203  | -1.098 | 1.133  | C  |
| HETATM | 26       | C  | 0 | 4.865  | -0.614 | -0.002 | C  |
| HETATM | 27       | H  | 0 | 4.714  | -0.280 | -2.133 | H  |
| HETATM | 28       | H  | 0 | 4.715  | -1.092 | 2.103  | H  |
| HETATM | 29       | C  | 0 | -3.190 | -2.054 | -2.115 | C  |
| HETATM | 30       | H  | 0 | -3.745 | -1.638 | -2.972 | H  |
| HETATM | 31       | H  | 0 | -2.116 | -1.974 | -2.352 | H  |
| HETATM | 32       | H  | 0 | -3.455 | -3.129 | -2.059 | H  |
| HETATM | 33       | C  | 0 | -1.977 | -0.424 | 2.528  | C  |
| HETATM | 34       | H  | 0 | -1.410 | -1.360 | 2.680  | H  |

|        |    |   |   |        |        |        |   |
|--------|----|---|---|--------|--------|--------|---|
| HETATM | 35 | H | 0 | -1.219 | 0.373  | 2.390  | H |
| HETATM | 36 | H | 0 | -2.499 | -0.187 | 3.470  | H |
| HETATM | 37 | C | 0 | -6.479 | 0.644  | 0.555  | C |
| HETATM | 38 | H | 0 | -6.497 | 1.598  | -0.005 | H |
| HETATM | 39 | H | 0 | -7.286 | 0.019  | 0.134  | H |
| HETATM | 40 | H | 0 | -6.741 | 0.881  | 1.600  | H |
| HETATM | 41 | C | 0 | 2.197  | -1.142 | -2.676 | C |
| HETATM | 42 | H | 0 | 2.828  | -0.699 | -3.463 | H |
| HETATM | 43 | H | 0 | 1.971  | -2.181 | -2.983 | H |
| HETATM | 44 | H | 0 | 1.232  | -0.600 | -2.667 | H |
| HETATM | 45 | C | 0 | 2.197  | -2.083 | 2.290  | C |
| HETATM | 46 | H | 0 | 2.067  | -3.183 | 2.260  | H |
| HETATM | 47 | H | 0 | 2.772  | -1.846 | 3.199  | H |
| HETATM | 48 | H | 0 | 1.198  | -1.632 | 2.416  | H |
| HETATM | 49 | C | 0 | 6.253  | -0.059 | 0.105  | C |
| HETATM | 50 | H | 0 | 6.229  | 1.014  | 0.374  | H |
| HETATM | 51 | H | 0 | 6.842  | -0.566 | 0.888  | H |
| HETATM | 52 | H | 0 | 6.805  | -0.137 | -0.846 | H |
| HETATM | 53 | H | 0 | -1.776 | -3.742 | -0.603 | H |
| HETATM | 54 | H | 0 | 0.470  | -3.643 | -1.461 | H |
| HETATM | 55 | C | 0 | 0.364  | 3.193  | -0.493 | C |
| HETATM | 56 | C | 0 | -0.863 | 2.551  | 0.188  | C |
| HETATM | 57 | H | 0 | -1.748 | 2.577  | -0.462 | H |
| HETATM | 58 | H | 0 | -1.031 | 2.912  | 1.215  | H |
| HETATM | 59 | H | 0 | 2.378  | 2.247  | -0.447 | H |
| HETATM | 60 | F | 0 | -0.046 | 3.885  | -1.598 | F |
| HETATM | 61 | F | 0 | 0.949  | 4.104  | 0.341  | F |

END

## a2m.pdb

| TITLE  | a2m.pdb |    |   |        |        |        |    |
|--------|---------|----|---|--------|--------|--------|----|
| HETATM | 1       | Ru | 0 | -0.119 | 0.897  | 0.039  | Ru |
| HETATM | 2       | Cl | 0 | -0.993 | 0.983  | -2.224 | Cl |
| HETATM | 3       | Cl | 0 | 0.667  | 0.910  | 2.338  | Cl |
| HETATM | 4       | C  | 0 | 0.065  | -1.129 | 0.026  | C  |
| HETATM | 5       | N  | 0 | -0.997 | -1.945 | 0.162  | N  |
| HETATM | 6       | C  | 0 | -0.617 | -3.361 | 0.158  | C  |
| HETATM | 7       | C  | 0 | 0.908  | -3.304 | 0.026  | C  |
| HETATM | 8       | N  | 0 | 1.186  | -1.865 | -0.047 | N  |
| HETATM | 9       | C  | 0 | -2.342 | -1.461 | 0.140  | C  |
| HETATM | 10      | C  | 0 | -3.047 | -1.427 | -1.080 | C  |
| HETATM | 11      | C  | 0 | -4.329 | -0.872 | -1.091 | C  |
| HETATM | 12      | C  | 0 | -4.922 | -0.367 | 0.073  | C  |
| HETATM | 13      | C  | 0 | -4.220 | -0.464 | 1.279  | C  |
| HETATM | 14      | C  | 0 | -2.935 | -1.016 | 1.339  | C  |
| HETATM | 15      | C  | 0 | 2.505  | -1.327 | -0.137 | C  |
| HETATM | 16      | C  | 0 | 3.312  | -1.262 | 1.012  | C  |
| HETATM | 17      | C  | 0 | 4.582  | -0.686 | 0.898  | C  |
| HETATM | 18      | C  | 0 | 5.058  | -0.188 | -0.319 | C  |
| HETATM | 19      | C  | 0 | 4.243  | -0.296 | -1.453 | C  |
| HETATM | 20      | C  | 0 | 2.968  | -0.865 | -1.385 | C  |
| HETATM | 21      | C  | 0 | -2.462 | -1.996 | -2.337 | C  |
| HETATM | 22      | C  | 0 | -6.278 | 0.269  | 0.019  | C  |
| HETATM | 23      | C  | 0 | -2.229 | -1.152 | 2.653  | C  |
| HETATM | 24      | C  | 0 | 2.852  | -1.813 | 2.327  | C  |
| HETATM | 25      | C  | 0 | 6.404  | 0.467  | -0.405 | C  |
| HETATM | 26      | C  | 0 | 2.111  | -0.975 | -2.608 | C  |
| HETATM | 27      | H  | 0 | -1.105 | -3.881 | -0.688 | H  |
| HETATM | 28      | H  | 0 | -0.956 | -3.854 | 1.088  | H  |
| HETATM | 29      | H  | 0 | 1.285  | -3.810 | -0.882 | H  |
| HETATM | 30      | H  | 0 | 1.430  | -3.748 | 0.894  | H  |

|        |    |   |   |        |        |        |   |
|--------|----|---|---|--------|--------|--------|---|
| HETATM | 31 | H | 0 | -4.873 | -0.819 | -2.043 | H |
| HETATM | 32 | H | 0 | -4.687 | -0.109 | 2.207  | H |
| HETATM | 33 | H | 0 | 5.213  | -0.617 | 1.794  | H |
| HETATM | 34 | H | 0 | 4.611  | 0.067  | -2.422 | H |
| HETATM | 35 | H | 0 | -2.738 | -3.063 | -2.458 | H |
| HETATM | 36 | H | 0 | -1.363 | -1.923 | -2.359 | H |
| HETATM | 37 | H | 0 | -2.834 | -1.459 | -3.224 | H |
| HETATM | 38 | H | 0 | -6.969 | -0.289 | -0.636 | H |
| HETATM | 39 | H | 0 | -6.221 | 1.295  | -0.389 | H |
| HETATM | 40 | H | 0 | -6.739 | 0.344  | 1.018  | H |
| HETATM | 41 | H | 0 | -2.914 | -0.940 | 3.491  | H |
| HETATM | 42 | H | 0 | -1.365 | -0.465 | 2.745  | H |
| HETATM | 43 | H | 0 | -1.827 | -2.171 | 2.801  | H |
| HETATM | 44 | H | 0 | 1.760  | -1.729 | 2.455  | H |
| HETATM | 45 | H | 0 | 3.315  | -1.269 | 3.167  | H |
| HETATM | 46 | H | 0 | 3.134  | -2.879 | 2.440  | H |
| HETATM | 47 | H | 0 | 7.104  | 0.074  | 0.351  | H |
| HETATM | 48 | H | 0 | 6.329  | 1.557  | -0.230 | H |
| HETATM | 49 | H | 0 | 6.864  | 0.338  | -1.399 | H |
| HETATM | 50 | H | 0 | 2.692  | -0.766 | -3.521 | H |
| HETATM | 51 | H | 0 | 1.256  | -0.269 | -2.590 | H |
| HETATM | 52 | H | 0 | 1.669  | -1.984 | -2.715 | H |
| HETATM | 53 | C | 0 | 1.325  | 1.953  | -0.430 | C |
| HETATM | 54 | H | 0 | 1.482  | 2.256  | -1.484 | H |
| HETATM | 55 | H | 0 | 2.095  | 2.249  | 0.309  | H |
| HETATM | 56 | C | 0 | -1.435 | 2.495  | 0.499  | C |
| HETATM | 57 | H | 0 | -2.261 | 2.462  | -0.223 | H |
| HETATM | 58 | H | 0 | -1.657 | 2.438  | 1.572  | H |
| HETATM | 59 | C | 0 | -0.306 | 3.269  | 0.130  | C |
| HETATM | 60 | F | 0 | -0.321 | 3.960  | -1.000 | F |
| HETATM | 61 | F | 0 | 0.370  | 3.933  | 1.055  | F |

END

## a2n.pdb

| TITLE  | a2n.pdb |    |   |        |        |        |    |
|--------|---------|----|---|--------|--------|--------|----|
| HETATM | 1       | Ru | 0 | -0.264 | 0.867  | 0.062  | Ru |
| HETATM | 2       | C  | 0 | -0.350 | -3.333 | 0.224  | C  |
| HETATM | 3       | C  | 0 | 1.169  | -3.180 | 0.310  | C  |
| HETATM | 4       | H  | 0 | -0.676 | -3.814 | -0.719 | H  |
| HETATM | 5       | H  | 0 | 1.708  | -3.735 | -0.478 | H  |
| HETATM | 6       | C  | 0 | 0.203  | -1.053 | 0.140  | C  |
| HETATM | 7       | N  | 0 | 1.370  | -1.737 | 0.143  | N  |
| HETATM | 8       | N  | 0 | -0.812 | -1.949 | 0.272  | N  |
| HETATM | 9       | Cl | 0 | -0.679 | 1.061  | -2.320 | Cl |
| HETATM | 10      | Cl | 0 | -0.141 | 0.978  | 2.489  | Cl |
| HETATM | 11      | C  | 0 | -1.852 | 2.709  | 0.180  | C  |
| HETATM | 12      | C  | 0 | 2.673  | -1.181 | -0.006 | C  |
| HETATM | 13      | C  | 0 | 3.462  | -0.932 | 1.133  | C  |
| HETATM | 14      | C  | 0 | 3.152  | -0.903 | -1.302 | C  |
| HETATM | 15      | C  | 0 | 4.741  | -0.395 | 0.951  | C  |
| HETATM | 16      | C  | 0 | 4.436  | -0.364 | -1.437 | C  |
| HETATM | 17      | C  | 0 | 5.241  | -0.101 | -0.323 | C  |
| HETATM | 18      | H  | 0 | 5.359  | -0.189 | 1.835  | H  |
| HETATM | 19      | H  | 0 | 4.815  | -0.145 | -2.444 | H  |
| HETATM | 20      | C  | 0 | -2.178 | -1.561 | 0.095  | C  |
| HETATM | 21      | C  | 0 | -2.983 | -1.314 | 1.230  | C  |
| HETATM | 22      | C  | 0 | -2.712 | -1.470 | -1.208 | C  |
| HETATM | 23      | C  | 0 | -4.291 | -0.861 | 1.029  | C  |
| HETATM | 24      | C  | 0 | -4.027 | -1.017 | -1.359 | C  |
| HETATM | 25      | C  | 0 | -4.821 | -0.686 | -0.256 | C  |
| HETATM | 26      | H  | 0 | -4.919 | -0.657 | 1.905  | H  |



|        |    |   |   |        |        |        |   |
|--------|----|---|---|--------|--------|--------|---|
| HETATM | 27 | H | 0 | -4.441 | -0.925 | -2.371 | H |
| HETATM | 28 | C | 0 | 2.918  | -1.178 | 2.506  | C |
| HETATM | 29 | H | 0 | 3.621  | -0.830 | 3.280  | H |
| HETATM | 30 | H | 0 | 1.958  | -0.646 | 2.655  | H |
| HETATM | 31 | H | 0 | 2.725  | -2.250 | 2.700  | H |
| HETATM | 32 | C | 0 | 2.290  | -1.155 | -2.499 | C |
| HETATM | 33 | H | 0 | 1.878  | -2.182 | -2.507 | H |
| HETATM | 34 | H | 0 | 1.419  | -0.469 | -2.523 | H |
| HETATM | 35 | H | 0 | 2.853  | -1.012 | -3.435 | H |
| HETATM | 36 | C | 0 | 6.599  | 0.512  | -0.491 | C |
| HETATM | 37 | H | 0 | 6.536  | 1.616  | -0.542 | H |
| HETATM | 38 | H | 0 | 7.269  | 0.270  | 0.350  | H |
| HETATM | 39 | H | 0 | 7.087  | 0.182  | -1.424 | H |
| HETATM | 40 | C | 0 | -2.475 | -1.589 | 2.609  | C |
| HETATM | 41 | H | 0 | -3.237 | -1.345 | 3.367  | H |
| HETATM | 42 | H | 0 | -2.214 | -2.656 | 2.737  | H |
| HETATM | 43 | H | 0 | -1.570 | -0.999 | 2.837  | H |
| HETATM | 44 | C | 0 | -1.937 | -1.922 | -2.408 | C |
| HETATM | 45 | H | 0 | -2.142 | -2.991 | -2.620 | H |
| HETATM | 46 | H | 0 | -2.219 | -1.347 | -3.303 | H |
| HETATM | 47 | H | 0 | -0.849 | -1.801 | -2.286 | H |
| HETATM | 48 | C | 0 | -6.210 | -0.156 | -0.444 | C |
| HETATM | 49 | H | 0 | -6.208 | 0.946  | -0.544 | H |
| HETATM | 50 | H | 0 | -6.683 | -0.553 | -1.358 | H |
| HETATM | 51 | H | 0 | -6.863 | -0.395 | 0.413  | H |
| HETATM | 52 | H | 0 | 1.574  | -3.514 | 1.284  | H |
| HETATM | 53 | H | 0 | -0.774 | -3.919 | 1.058  | H |
| HETATM | 54 | C | 0 | -0.834 | 3.595  | 0.114  | C |
| HETATM | 55 | C | 0 | 1.422  | 1.520  | -0.107 | C |
| HETATM | 56 | H | 0 | 2.195  | 1.427  | 0.684  | H |
| HETATM | 57 | H | 0 | 1.717  | 2.104  | -1.008 | H |
| HETATM | 58 | H | 0 | -2.265 | 2.471  | 1.164  | H |
| HETATM | 59 | H | 0 | -2.394 | 2.472  | -0.739 | H |
| HETATM | 60 | F | 0 | -0.368 | 4.112  | -0.988 | F |
| HETATM | 61 | F | 0 | -0.230 | 4.111  | 1.149  | F |

END

### sc3g.pdb

|        |          |    |   |        |        |        |    |
|--------|----------|----|---|--------|--------|--------|----|
| TITLE  | sc3g.pdb |    |   |        |        |        |    |
| HETATM | 1        | Ru | 0 | -0.262 | 0.936  | -0.279 | Ru |
| HETATM | 2        | C  | 0 | -0.244 | -2.860 | 1.519  | C  |
| HETATM | 3        | C  | 0 | 1.276  | -2.689 | 1.492  | C  |
| HETATM | 4        | H  | 0 | -0.587 | -3.747 | 0.953  | H  |
| HETATM | 5        | H  | 0 | 1.796  | -3.495 | 0.942  | H  |
| HETATM | 6        | C  | 0 | 0.288  | -0.824 | 0.460  | C  |
| HETATM | 7        | N  | 0 | 1.460  | -1.407 | 0.803  | N  |
| HETATM | 8        | N  | 0 | -0.718 | -1.636 | 0.883  | N  |
| HETATM | 9        | Cl | 0 | -0.825 | 0.126  | -2.500 | Cl |
| HETATM | 10       | Cl | 0 | -0.236 | 1.907  | 1.918  | Cl |
| HETATM | 11       | C  | 0 | -2.202 | 2.550  | -0.778 | C  |
| HETATM | 12       | C  | 0 | 2.753  | -0.970 | 0.396  | C  |
| HETATM | 13       | C  | 0 | 3.539  | -0.186 | 1.260  | C  |
| HETATM | 14       | C  | 0 | 3.214  | -1.332 | -0.883 | C  |
| HETATM | 15       | C  | 0 | 4.797  | 0.237  | 0.815  | C  |
| HETATM | 16       | C  | 0 | 4.479  | -0.895 | -1.288 | C  |
| HETATM | 17       | C  | 0 | 5.280  | -0.106 | -0.453 | C  |
| HETATM | 18       | H  | 0 | 5.413  | 0.855  | 1.480  | H  |
| HETATM | 19       | H  | 0 | 4.843  | -1.171 | -2.286 | H  |
| HETATM | 20       | C  | 0 | -2.084 | -1.399 | 0.532  | C  |
| HETATM | 21       | C  | 0 | -2.923 | -0.654 | 1.386  | C  |
| HETATM | 22       | C  | 0 | -2.578 | -1.930 | -0.682 | C  |

|        |    |   |   |        |        |        |   |
|--------|----|---|---|--------|--------|--------|---|
| HETATM | 23 | C | 0 | -4.217 | -0.345 | 0.943  | C |
| HETATM | 24 | C | 0 | -3.877 | -1.610 | -1.073 | C |
| HETATM | 25 | C | 0 | -4.702 | -0.793 | -0.286 | C |
| HETATM | 26 | H | 0 | -4.863 | 0.261  | 1.593  | H |
| HETATM | 27 | H | 0 | -4.252 | -1.997 | -2.029 | H |
| HETATM | 28 | C | 0 | 3.016  | 0.218  | 2.603  | C |
| HETATM | 29 | H | 0 | 3.754  | 0.822  | 3.156  | H |
| HETATM | 30 | H | 0 | 2.085  | 0.811  | 2.514  | H |
| HETATM | 31 | H | 0 | 2.766  | -0.657 | 3.232  | H |
| HETATM | 32 | C | 0 | 2.329  | -2.098 | -1.818 | C |
| HETATM | 33 | H | 0 | 1.899  | -3.003 | -1.349 | H |
| HETATM | 34 | H | 0 | 1.468  | -1.482 | -2.151 | H |
| HETATM | 35 | H | 0 | 2.877  | -2.416 | -2.720 | H |
| HETATM | 36 | C | 0 | 6.615  | 0.392  | -0.921 | C |
| HETATM | 37 | H | 0 | 6.528  | 1.390  | -1.391 | H |
| HETATM | 38 | H | 0 | 7.331  | 0.498  | -0.088 | H |
| HETATM | 39 | H | 0 | 7.064  | -0.276 | -1.675 | H |
| HETATM | 40 | C | 0 | -2.523 | -0.270 | 2.777  | C |
| HETATM | 41 | H | 0 | -2.723 | 0.796  | 2.975  | H |
| HETATM | 42 | H | 0 | -3.113 | -0.855 | 3.509  | H |
| HETATM | 43 | H | 0 | -1.455 | -0.436 | 2.981  | H |
| HETATM | 44 | C | 0 | -1.749 | -2.853 | -1.521 | C |
| HETATM | 45 | H | 0 | -1.878 | -3.906 | -1.200 | H |
| HETATM | 46 | H | 0 | -2.043 | -2.797 | -2.581 | H |
| HETATM | 47 | H | 0 | -0.674 | -2.617 | -1.474 | H |
| HETATM | 48 | C | 0 | -6.067 | -0.405 | -0.765 | C |
| HETATM | 49 | H | 0 | -6.015 | 0.445  | -1.472 | H |
| HETATM | 50 | H | 0 | -6.566 | -1.229 | -1.305 | H |
| HETATM | 51 | H | 0 | -6.723 | -0.092 | 0.064  | H |
| HETATM | 52 | H | 0 | 1.722  | -2.645 | 2.503  | H |
| HETATM | 53 | H | 0 | -0.650 | -2.945 | 2.544  | H |
| HETATM | 54 | C | 0 | -1.067 | 3.230  | -1.043 | C |
| HETATM | 55 | H | 0 | -0.615 | 3.131  | -2.033 | H |
| HETATM | 56 | C | 0 | 1.377  | 1.535  | -0.735 | C |
| HETATM | 57 | H | 0 | 2.210  | 0.948  | -1.177 | H |
| HETATM | 58 | H | 0 | -0.666 | 3.961  | -0.334 | H |
| HETATM | 59 | H | 0 | -2.687 | 1.849  | -1.471 | H |
| HETATM | 60 | F | 0 | 1.769  | 2.806  | -0.660 | F |
| HETATM | 61 | F | 0 | -2.907 | 2.742  | 0.332  | F |

END

### sc3h.pdb

|        |          |    |   |        |        |        |    |
|--------|----------|----|---|--------|--------|--------|----|
| TITLE  | sc3h.pdb |    |   |        |        |        |    |
| HETATM | 1        | Ru | 0 | 0.221  | -0.949 | -0.134 | Ru |
| HETATM | 2        | Cl | 0 | 0.935  | -0.741 | -2.470 | Cl |
| HETATM | 3        | Cl | 0 | -0.425 | -1.262 | 2.189  | Cl |
| HETATM | 4        | C  | 0 | -0.119 | 1.031  | 0.216  | C  |
| HETATM | 5        | N  | 0 | 0.921  | 1.836  | 0.508  | N  |
| HETATM | 6        | C  | 0 | 0.506  | 3.211  | 0.790  | C  |
| HETATM | 7        | C  | 0 | -1.024 | 3.120  | 0.725  | C  |
| HETATM | 8        | N  | 0 | -1.262 | 1.728  | 0.323  | N  |
| HETATM | 9        | C  | 0 | 2.266  | 1.393  | 0.290  | C  |
| HETATM | 10       | C  | 0 | 2.843  | 1.553  | -0.988 | C  |
| HETATM | 11       | C  | 0 | 4.112  | 1.017  | -1.216 | C  |
| HETATM | 12       | C  | 0 | 4.817  | 0.345  | -0.210 | C  |
| HETATM | 13       | C  | 0 | 4.246  | 0.252  | 1.063  | C  |
| HETATM | 14       | C  | 0 | 2.979  | 0.781  | 1.343  | C  |
| HETATM | 15       | C  | 0 | -2.559 | 1.186  | 0.082  | C  |
| HETATM | 16       | C  | 0 | -3.402 | 0.857  | 1.159  | C  |
| HETATM | 17       | C  | 0 | -4.644 | 0.277  | 0.877  | C  |
| HETATM | 18       | C  | 0 | -5.058 | 0.026  | -0.434 | C  |

|        |    |   |   |        |        |        |   |
|--------|----|---|---|--------|--------|--------|---|
| HETATM | 19 | C | 0 | -4.214 | 0.398  | -1.488 | C |
| HETATM | 20 | C | 0 | -2.967 | 0.984  | -1.252 | C |
| HETATM | 21 | C | 0 | 2.136  | 2.308  | -2.071 | C |
| HETATM | 22 | C | 0 | 6.150  | -0.274 | -0.502 | C |
| HETATM | 23 | C | 0 | 2.424  | 0.728  | 2.731  | C |
| HETATM | 24 | C | 0 | -3.002 | 1.130  | 2.577  | C |
| HETATM | 25 | C | 0 | -6.369 | -0.648 | -0.708 | C |
| HETATM | 26 | C | 0 | -2.082 | 1.388  | -2.391 | C |
| HETATM | 27 | H | 0 | 0.927  | 3.900  | 0.033  | H |
| HETATM | 28 | H | 0 | 0.878  | 3.537  | 1.778  | H |
| HETATM | 29 | H | 0 | -1.469 | 3.810  | -0.015 | H |
| HETATM | 30 | H | 0 | -1.506 | 3.322  | 1.699  | H |
| HETATM | 31 | H | 0 | 4.554  | 1.114  | -2.216 | H |
| HETATM | 32 | H | 0 | 4.801  | -0.239 | 1.872  | H |
| HETATM | 33 | H | 0 | -5.299 | 0.002  | 1.714  | H |
| HETATM | 34 | H | 0 | -4.536 | 0.237  | -2.525 | H |
| HETATM | 35 | H | 0 | 1.043  | 2.168  | -2.035 | H |
| HETATM | 36 | H | 0 | 2.468  | 1.978  | -3.067 | H |
| HETATM | 37 | H | 0 | 2.340  | 3.395  | -1.997 | H |
| HETATM | 38 | H | 0 | 6.034  | -1.247 | -1.016 | H |
| HETATM | 39 | H | 0 | 6.728  | -0.464 | 0.418  | H |
| HETATM | 40 | H | 0 | 6.763  | 0.358  | -1.168 | H |
| HETATM | 41 | H | 0 | 3.167  | 0.322  | 3.437  | H |
| HETATM | 42 | H | 0 | 1.517  | 0.097  | 2.798  | H |
| HETATM | 43 | H | 0 | 2.137  | 1.733  | 3.092  | H |
| HETATM | 44 | H | 0 | -1.913 | 1.046  | 2.721  | H |
| HETATM | 45 | H | 0 | -3.474 | 0.411  | 3.266  | H |
| HETATM | 46 | H | 0 | -3.320 | 2.141  | 2.900  | H |
| HETATM | 47 | H | 0 | -6.247 | -1.745 | -0.785 | H |
| HETATM | 48 | H | 0 | -7.103 | -0.467 | 0.095  | H |
| HETATM | 49 | H | 0 | -6.815 | -0.312 | -1.661 | H |
| HETATM | 50 | H | 0 | -2.627 | 1.352  | -3.349 | H |
| HETATM | 51 | H | 0 | -1.197 | 0.729  | -2.488 | H |
| HETATM | 52 | H | 0 | -1.690 | 2.415  | -2.265 | H |
| HETATM | 53 | C | 0 | -1.254 | -1.909 | -0.690 | C |
| HETATM | 54 | F | 0 | -2.206 | -2.454 | 0.043  | F |
| HETATM | 55 | H | 0 | -1.504 | -2.046 | -1.765 | H |
| HETATM | 56 | C | 0 | 1.645  | -2.548 | -0.013 | C |
| HETATM | 57 | C | 0 | 0.500  | -3.193 | -0.530 | C |
| HETATM | 58 | F | 0 | 2.076  | -2.845 | 1.221  | F |
| HETATM | 59 | H | 0 | 2.466  | -2.214 | -0.665 | H |
| HETATM | 60 | H | 0 | 0.482  | -3.385 | -1.610 | H |
| HETATM | 61 | H | 0 | -0.022 | -3.895 | 0.133  | H |

END

### sc3NA.pdb

| TITLE  | sc3NA.pdb |    |   |        |        |        |    |
|--------|-----------|----|---|--------|--------|--------|----|
| HETATM | 1         | Ru | 0 | 0.042  | -0.963 | -0.133 | Ru |
| HETATM | 2         | C  | 0 | 0.734  | 3.199  | 0.607  | C  |
| HETATM | 3         | C  | 0 | -0.777 | 3.233  | 0.360  | C  |
| HETATM | 4         | H  | 0 | 1.299  | 3.865  | -0.068 | H  |
| HETATM | 5         | H  | 0 | -1.056 | 3.811  | -0.542 | H  |
| HETATM | 6         | C  | 0 | -0.013 | 1.046  | 0.131  | C  |
| HETATM | 7         | N  | 0 | -1.111 | 1.816  | 0.169  | N  |
| HETATM | 8         | N  | 0 | 1.079  | 1.798  | 0.343  | N  |
| HETATM | 9         | Cl | 0 | 1.029  | -0.787 | -2.370 | Cl |
| HETATM | 10        | Cl | 0 | -0.945 | -1.171 | 2.066  | Cl |
| HETATM | 11        | C  | 0 | 1.365  | -2.368 | 0.169  | C  |
| HETATM | 12        | C  | 0 | -2.441 | 1.319  | 0.003  | C  |
| HETATM | 13        | C  | 0 | -3.277 | 1.192  | 1.128  | C  |
| HETATM | 14        | C  | 0 | -2.885 | 0.961  | -1.284 | C  |

|        |    |   |   |        |        |        |   |
|--------|----|---|---|--------|--------|--------|---|
| HETATM | 15 | C | 0 | -4.550 | 0.643  | 0.947  | C |
| HETATM | 16 | C | 0 | -4.164 | 0.408  | -1.416 | C |
| HETATM | 17 | C | 0 | -5.001 | 0.228  | -0.310 | C |
| HETATM | 18 | H | 0 | -5.200 | 0.519  | 1.823  | H |
| HETATM | 19 | H | 0 | -4.517 | 0.122  | -2.416 | H |
| HETATM | 20 | C | 0 | 2.416  | 1.297  | 0.254  | C |
| HETATM | 21 | C | 0 | 2.979  | 0.616  | 1.352  | C |
| HETATM | 22 | C | 0 | 3.134  | 1.484  | -0.941 | C |
| HETATM | 23 | C | 0 | 4.263  | 0.077  | 1.208  | C |
| HETATM | 24 | C | 0 | 4.416  | 0.936  | -1.037 | C |
| HETATM | 25 | C | 0 | 4.989  | 0.218  | 0.020  | C |
| HETATM | 26 | H | 0 | 4.708  | -0.461 | 2.054  | H |
| HETATM | 27 | H | 0 | 4.975  | 1.059  | -1.973 | H |
| HETATM | 28 | C | 0 | -2.834 | 1.641  | 2.486  | C |
| HETATM | 29 | H | 0 | -3.357 | 1.080  | 3.278  | H |
| HETATM | 30 | H | 0 | -1.753 | 1.481  | 2.639  | H |
| HETATM | 31 | H | 0 | -3.055 | 2.714  | 2.653  | H |
| HETATM | 32 | C | 0 | -2.026 | 1.189  | -2.491 | C |
| HETATM | 33 | H | 0 | -1.601 | 2.211  | -2.508 | H |
| HETATM | 34 | H | 0 | -1.161 | 0.501  | -2.545 | H |
| HETATM | 35 | H | 0 | -2.606 | 1.057  | -3.419 | H |
| HETATM | 36 | C | 0 | -6.346 | -0.414 | -0.465 | C |
| HETATM | 37 | H | 0 | -6.289 | -1.504 | -0.285 | H |
| HETATM | 38 | H | 0 | -7.081 | -0.014 | 0.254  | H |
| HETATM | 39 | H | 0 | -6.754 | -0.281 | -1.482 | H |
| HETATM | 40 | C | 0 | 2.231  | 0.475  | 2.642  | C |
| HETATM | 41 | H | 0 | 2.871  | 0.033  | 3.422  | H |
| HETATM | 42 | H | 0 | 1.871  | 1.451  | 3.017  | H |
| HETATM | 43 | H | 0 | 1.333  | -0.166 | 2.548  | H |
| HETATM | 44 | C | 0 | 2.556  | 2.255  | -2.088 | C |
| HETATM | 45 | H | 0 | 2.761  | 3.341  | -1.995 | H |
| HETATM | 46 | H | 0 | 2.992  | 1.925  | -3.044 | H |
| HETATM | 47 | H | 0 | 1.464  | 2.121  | -2.170 | H |
| HETATM | 48 | C | 0 | 6.344  | -0.405 | -0.126 | C |
| HETATM | 49 | H | 0 | 6.273  | -1.411 | -0.583 | H |
| HETATM | 50 | H | 0 | 7.006  | 0.190  | -0.778 | H |
| HETATM | 51 | H | 0 | 6.846  | -0.534 | 0.848  | H |
| HETATM | 52 | H | 0 | -1.344 | 3.649  | 1.209  | H |
| HETATM | 53 | H | 0 | 1.008  | 3.467  | 1.645  | H |
| HETATM | 54 | C | 0 | 0.170  | -3.153 | -0.474 | C |
| HETATM | 55 | H | 0 | 0.560  | -3.578 | -1.415 | H |
| HETATM | 56 | H | 0 | -0.143 | -3.912 | 0.262  | H |
| HETATM | 57 | C | 0 | -1.123 | -2.353 | -0.867 | C |
| HETATM | 58 | H | 0 | -1.313 | -2.305 | -1.954 | H |
| HETATM | 59 | H | 0 | 2.279  | -2.335 | -0.447 | H |
| HETATM | 60 | F | 0 | 1.677  | -2.782 | 1.415  | F |
| HETATM | 61 | F | 0 | -2.234 | -2.778 | -0.240 | F |

END

### sc3i.pdb

|        |          |    |   |        |        |        |    |
|--------|----------|----|---|--------|--------|--------|----|
| TITLE  | sc3i.pdb |    |   |        |        |        |    |
| HETATM | 1        | Ru | 0 | 0.221  | -0.949 | -0.134 | Ru |
| HETATM | 2        | Cl | 0 | 0.935  | -0.741 | -2.470 | Cl |
| HETATM | 3        | Cl | 0 | -0.425 | -1.262 | 2.189  | Cl |
| HETATM | 4        | C  | 0 | -0.119 | 1.031  | 0.216  | C  |
| HETATM | 5        | N  | 0 | 0.921  | 1.836  | 0.508  | N  |
| HETATM | 6        | C  | 0 | 0.506  | 3.211  | 0.790  | C  |
| HETATM | 7        | C  | 0 | -1.024 | 3.120  | 0.725  | C  |
| HETATM | 8        | N  | 0 | -1.262 | 1.728  | 0.323  | N  |
| HETATM | 9        | C  | 0 | 2.266  | 1.393  | 0.290  | C  |

|        |    |   |   |        |        |        |   |
|--------|----|---|---|--------|--------|--------|---|
| HETATM | 10 | C | 0 | 2.843  | 1.553  | -0.988 | C |
| HETATM | 11 | C | 0 | 4.112  | 1.017  | -1.216 | C |
| HETATM | 12 | C | 0 | 4.817  | 0.345  | -0.210 | C |
| HETATM | 13 | C | 0 | 4.246  | 0.252  | 1.063  | C |
| HETATM | 14 | C | 0 | 2.979  | 0.781  | 1.343  | C |
| HETATM | 15 | C | 0 | -2.559 | 1.186  | 0.082  | C |
| HETATM | 16 | C | 0 | -3.402 | 0.857  | 1.159  | C |
| HETATM | 17 | C | 0 | -4.644 | 0.277  | 0.877  | C |
| HETATM | 18 | C | 0 | -5.058 | 0.026  | -0.434 | C |
| HETATM | 19 | C | 0 | -4.214 | 0.398  | -1.488 | C |
| HETATM | 20 | C | 0 | -2.967 | 0.984  | -1.252 | C |
| HETATM | 21 | C | 0 | 2.136  | 2.308  | -2.071 | C |
| HETATM | 22 | C | 0 | 6.150  | -0.274 | -0.502 | C |
| HETATM | 23 | C | 0 | 2.424  | 0.728  | 2.731  | C |
| HETATM | 24 | C | 0 | -3.002 | 1.130  | 2.577  | C |
| HETATM | 25 | C | 0 | -6.369 | -0.648 | -0.708 | C |
| HETATM | 26 | C | 0 | -2.082 | 1.388  | -2.391 | C |
| HETATM | 27 | H | 0 | 0.927  | 3.900  | 0.033  | H |
| HETATM | 28 | H | 0 | 0.878  | 3.537  | 1.778  | H |
| HETATM | 29 | H | 0 | -1.469 | 3.810  | -0.015 | H |
| HETATM | 30 | H | 0 | -1.506 | 3.322  | 1.699  | H |
| HETATM | 31 | H | 0 | 4.554  | 1.114  | -2.216 | H |
| HETATM | 32 | H | 0 | 4.801  | -0.239 | 1.872  | H |
| HETATM | 33 | H | 0 | -5.299 | 0.002  | 1.714  | H |
| HETATM | 34 | H | 0 | -4.536 | 0.237  | -2.525 | H |
| HETATM | 35 | H | 0 | 1.043  | 2.168  | -2.035 | H |
| HETATM | 36 | H | 0 | 2.468  | 1.978  | -3.067 | H |
| HETATM | 37 | H | 0 | 2.340  | 3.395  | -1.997 | H |
| HETATM | 38 | H | 0 | 6.034  | -1.247 | -1.016 | H |
| HETATM | 39 | H | 0 | 6.728  | -0.464 | 0.418  | H |
| HETATM | 40 | H | 0 | 6.763  | 0.358  | -1.168 | H |
| HETATM | 41 | H | 0 | 3.167  | 0.322  | 3.437  | H |
| HETATM | 42 | H | 0 | 1.517  | 0.097  | 2.798  | H |
| HETATM | 43 | H | 0 | 2.137  | 1.733  | 3.092  | H |
| HETATM | 44 | H | 0 | -1.913 | 1.046  | 2.721  | H |
| HETATM | 45 | H | 0 | -3.474 | 0.411  | 3.266  | H |
| HETATM | 46 | H | 0 | -3.320 | 2.141  | 2.900  | H |
| HETATM | 47 | H | 0 | -6.247 | -1.745 | -0.785 | H |
| HETATM | 48 | H | 0 | -7.103 | -0.467 | 0.095  | H |
| HETATM | 49 | H | 0 | -6.815 | -0.312 | -1.661 | H |
| HETATM | 50 | H | 0 | -2.627 | 1.352  | -3.349 | H |
| HETATM | 51 | H | 0 | -1.197 | 0.729  | -2.488 | H |
| HETATM | 52 | H | 0 | -1.690 | 2.415  | -2.265 | H |
| HETATM | 53 | C | 0 | -1.254 | -1.909 | -0.690 | C |
| HETATM | 54 | F | 0 | -2.206 | -2.454 | 0.043  | F |
| HETATM | 55 | H | 0 | -1.504 | -2.046 | -1.765 | H |
| HETATM | 56 | C | 0 | 1.645  | -2.548 | -0.013 | C |
| HETATM | 57 | C | 0 | 0.500  | -3.193 | -0.530 | C |
| HETATM | 58 | F | 0 | 2.076  | -2.845 | 1.221  | F |
| HETATM | 59 | H | 0 | 2.466  | -2.214 | -0.665 | H |
| HETATM | 60 | H | 0 | 0.482  | -3.385 | -1.610 | H |
| HETATM | 61 | H | 0 | -0.022 | -3.895 | 0.133  | H |

END

### sc3j.pdb

|        |          |    |   |        |        |        |    |
|--------|----------|----|---|--------|--------|--------|----|
| TITLE  | sc3j.pdb |    |   |        |        |        |    |
| HETATM | 1        | Ru | 0 | -0.262 | 0.936  | -0.279 | Ru |
| HETATM | 2        | C  | 0 | -0.244 | -2.860 | 1.519  | C  |
| HETATM | 3        | C  | 0 | 1.276  | -2.689 | 1.492  | C  |
| HETATM | 4        | H  | 0 | -0.587 | -3.747 | 0.953  | H  |

|        |    |    |   |        |        |        |    |
|--------|----|----|---|--------|--------|--------|----|
| HETATM | 5  | H  | 0 | 1.796  | -3.495 | 0.942  | H  |
| HETATM | 6  | C  | 0 | 0.288  | -0.824 | 0.460  | C  |
| HETATM | 7  | N  | 0 | 1.460  | -1.407 | 0.803  | N  |
| HETATM | 8  | N  | 0 | -0.718 | -1.636 | 0.883  | N  |
| HETATM | 9  | Cl | 0 | -0.825 | 0.126  | -2.500 | Cl |
| HETATM | 10 | Cl | 0 | -0.236 | 1.907  | 1.918  | Cl |
| HETATM | 11 | C  | 0 | -2.202 | 2.550  | -0.778 | C  |
| HETATM | 12 | C  | 0 | 2.753  | -0.970 | 0.396  | C  |
| HETATM | 13 | C  | 0 | 3.539  | -0.186 | 1.260  | C  |
| HETATM | 14 | C  | 0 | 3.214  | -1.332 | -0.883 | C  |
| HETATM | 15 | C  | 0 | 4.797  | 0.237  | 0.815  | C  |
| HETATM | 16 | C  | 0 | 4.479  | -0.895 | -1.288 | C  |
| HETATM | 17 | C  | 0 | 5.280  | -0.106 | -0.453 | C  |
| HETATM | 18 | H  | 0 | 5.413  | 0.855  | 1.480  | H  |
| HETATM | 19 | H  | 0 | 4.843  | -1.171 | -2.286 | H  |
| HETATM | 20 | C  | 0 | -2.084 | -1.399 | 0.532  | C  |
| HETATM | 21 | C  | 0 | -2.923 | -0.654 | 1.386  | C  |
| HETATM | 22 | C  | 0 | -2.578 | -1.930 | -0.682 | C  |
| HETATM | 23 | C  | 0 | -4.217 | -0.345 | 0.943  | C  |
| HETATM | 24 | C  | 0 | -3.877 | -1.610 | -1.073 | C  |
| HETATM | 25 | C  | 0 | -4.702 | -0.793 | -0.286 | C  |
| HETATM | 26 | H  | 0 | -4.863 | 0.261  | 1.593  | H  |
| HETATM | 27 | H  | 0 | -4.252 | -1.997 | -2.029 | H  |
| HETATM | 28 | C  | 0 | 3.016  | 0.218  | 2.603  | C  |
| HETATM | 29 | H  | 0 | 3.754  | 0.822  | 3.156  | H  |
| HETATM | 30 | H  | 0 | 2.085  | 0.811  | 2.514  | H  |
| HETATM | 31 | H  | 0 | 2.766  | -0.657 | 3.232  | H  |
| HETATM | 32 | C  | 0 | 2.329  | -2.098 | -1.818 | C  |
| HETATM | 33 | H  | 0 | 1.899  | -3.003 | -1.349 | H  |
| HETATM | 34 | H  | 0 | 1.468  | -1.482 | -2.151 | H  |
| HETATM | 35 | H  | 0 | 2.877  | -2.416 | -2.720 | H  |
| HETATM | 36 | C  | 0 | 6.615  | 0.392  | -0.921 | C  |
| HETATM | 37 | H  | 0 | 6.528  | 1.390  | -1.391 | H  |
| HETATM | 38 | H  | 0 | 7.331  | 0.498  | -0.088 | H  |
| HETATM | 39 | H  | 0 | 7.064  | -0.276 | -1.675 | H  |
| HETATM | 40 | C  | 0 | -2.523 | -0.270 | 2.777  | C  |
| HETATM | 41 | H  | 0 | -2.723 | 0.796  | 2.975  | H  |
| HETATM | 42 | H  | 0 | -3.113 | -0.855 | 3.509  | H  |
| HETATM | 43 | H  | 0 | -1.455 | -0.436 | 2.981  | H  |
| HETATM | 44 | C  | 0 | -1.749 | -2.853 | -1.521 | C  |
| HETATM | 45 | H  | 0 | -1.878 | -3.906 | -1.200 | H  |
| HETATM | 46 | H  | 0 | -2.043 | -2.797 | -2.581 | H  |
| HETATM | 47 | H  | 0 | -0.674 | -2.617 | -1.474 | H  |
| HETATM | 48 | C  | 0 | -6.067 | -0.405 | -0.765 | C  |
| HETATM | 49 | H  | 0 | -6.015 | 0.445  | -1.472 | H  |
| HETATM | 50 | H  | 0 | -6.566 | -1.229 | -1.305 | H  |
| HETATM | 51 | H  | 0 | -6.723 | -0.092 | 0.064  | H  |
| HETATM | 52 | H  | 0 | 1.722  | -2.645 | 2.503  | H  |
| HETATM | 53 | H  | 0 | -0.650 | -2.945 | 2.544  | H  |
| HETATM | 54 | C  | 0 | -1.067 | 3.230  | -1.043 | C  |
| HETATM | 55 | H  | 0 | -0.615 | 3.131  | -2.033 | H  |
| HETATM | 56 | C  | 0 | 1.377  | 1.535  | -0.735 | C  |
| HETATM | 57 | H  | 0 | 2.210  | 0.948  | -1.177 | H  |
| HETATM | 58 | H  | 0 | -0.666 | 3.961  | -0.334 | H  |
| HETATM | 59 | H  | 0 | -2.687 | 1.849  | -1.471 | H  |
| HETATM | 60 | F  | 0 | 1.769  | 2.806  | -0.660 | F  |
| HETATM | 61 | F  | 0 | -2.907 | 2.742  | 0.332  | F  |

END

### st3g.pdb

TITLE st3g.pdb

|        |    |    |   |        |        |        |    |
|--------|----|----|---|--------|--------|--------|----|
| HETATM | 1  | Ru | 0 | 0.238  | -0.976 | 0.076  | Ru |
| HETATM | 2  | C  | 0 | 0.326  | 3.236  | 0.200  | C  |
| HETATM | 3  | C  | 0 | -1.196 | 3.094  | 0.269  | C  |
| HETATM | 4  | H  | 0 | 0.666  | 3.742  | -0.724 | H  |
| HETATM | 5  | H  | 0 | -1.720 | 3.622  | -0.548 | H  |
| HETATM | 6  | C  | 0 | -0.242 | 0.956  | 0.123  | C  |
| HETATM | 7  | N  | 0 | -1.403 | 1.648  | 0.149  | N  |
| HETATM | 8  | N  | 0 | 0.779  | 1.848  | 0.213  | N  |
| HETATM | 9  | Cl | 0 | 0.756  | -1.132 | -2.297 | Cl |
| HETATM | 10 | Cl | 0 | 0.054  | -1.049 | 2.495  | Cl |
| HETATM | 11 | C  | 0 | 2.089  | -2.697 | 0.130  | C  |
| HETATM | 12 | C  | 0 | -2.706 | 1.085  | 0.029  | C  |
| HETATM | 13 | C  | 0 | -3.482 | 0.869  | 1.183  | C  |
| HETATM | 14 | C  | 0 | -3.184 | 0.737  | -1.250 | C  |
| HETATM | 15 | C  | 0 | -4.748 | 0.289  | 1.033  | C  |
| HETATM | 16 | C  | 0 | -4.453 | 0.157  | -1.353 | C  |
| HETATM | 17 | C  | 0 | -5.245 | -0.078 | -0.223 | C  |
| HETATM | 18 | H  | 0 | -5.356 | 0.108  | 1.929  | H  |
| HETATM | 19 | H  | 0 | -4.829 | -0.121 | -2.346 | H  |
| HETATM | 20 | C  | 0 | 2.143  | 1.454  | 0.030  | C  |
| HETATM | 21 | C  | 0 | 2.950  | 1.184  | 1.157  | C  |
| HETATM | 22 | C  | 0 | 2.672  | 1.383  | -1.276 | C  |
| HETATM | 23 | C  | 0 | 4.253  | 0.722  | 0.944  | C  |
| HETATM | 24 | C  | 0 | 3.981  | 0.919  | -1.439 | C  |
| HETATM | 25 | C  | 0 | 4.774  | 0.557  | -0.345 | C  |
| HETATM | 26 | H  | 0 | 4.879  | 0.490  | 1.815  | H  |
| HETATM | 27 | H  | 0 | 4.389  | 0.836  | -2.455 | H  |
| HETATM | 28 | C  | 0 | -2.943 | 1.192  | 2.541  | C  |
| HETATM | 29 | H  | 0 | -3.641 | 0.874  | 3.332  | H  |
| HETATM | 30 | H  | 0 | -1.975 | 0.683  | 2.719  | H  |
| HETATM | 31 | H  | 0 | -2.768 | 2.276  | 2.681  | H  |
| HETATM | 32 | C  | 0 | -2.332 | 0.946  | -2.463 | C  |
| HETATM | 33 | H  | 0 | -1.911 | 1.968  | -2.505 | H  |
| HETATM | 34 | H  | 0 | -1.466 | 0.253  | -2.483 | H  |
| HETATM | 35 | H  | 0 | -2.908 | 0.782  | -3.389 | H  |
| HETATM | 36 | C  | 0 | -6.585 | -0.737 | -0.355 | C  |
| HETATM | 37 | H  | 0 | -6.488 | -1.839 | -0.385 | H  |
| HETATM | 38 | H  | 0 | -7.248 | -0.499 | 0.494  | H  |
| HETATM | 39 | H  | 0 | -7.100 | -0.442 | -1.285 | H  |
| HETATM | 40 | C  | 0 | 2.457  | 1.450  | 2.544  | C  |
| HETATM | 41 | H  | 0 | 3.206  | 1.148  | 3.294  | H  |
| HETATM | 42 | H  | 0 | 2.257  | 2.528  | 2.696  | H  |
| HETATM | 43 | H  | 0 | 1.523  | 0.907  | 2.767  | H  |
| HETATM | 44 | C  | 0 | 1.897  | 1.865  | -2.464 | C  |
| HETATM | 45 | H  | 0 | 2.102  | 2.939  | -2.652 | H  |
| HETATM | 46 | H  | 0 | 2.180  | 1.311  | -3.374 | H  |
| HETATM | 47 | H  | 0 | 0.809  | 1.741  | -2.345 | H  |
| HETATM | 48 | C  | 0 | 6.150  | 0.000  | -0.546 | C  |
| HETATM | 49 | H  | 0 | 6.126  | -1.105 | -0.605 | H  |
| HETATM | 50 | H  | 0 | 6.608  | 0.357  | -1.483 | H  |
| HETATM | 51 | H  | 0 | 6.826  | 0.256  | 0.288  | H  |
| HETATM | 52 | H  | 0 | -1.615 | 3.466  | 1.223  | H  |
| HETATM | 53 | H  | 0 | 0.747  | 3.793  | 1.056  | H  |
| HETATM | 54 | C  | 0 | 0.931  | -3.390 | 0.210  | C  |
| HETATM | 55 | H  | 0 | 0.432  | -3.681 | -0.718 | H  |
| HETATM | 56 | C  | 0 | -1.432 | -1.639 | -0.119 | C  |
| HETATM | 57 | H  | 0 | -2.291 | -1.442 | 0.557  | H  |
| HETATM | 58 | H  | 0 | 0.569  | -3.776 | 1.169  | H  |
| HETATM | 59 | H  | 0 | 2.560  | -2.361 | -0.803 | H  |
| HETATM | 60 | F  | 0 | 2.832  | -2.441 | 1.204  | F  |
| HETATM | 61 | F  | 0 | -1.820 | -2.512 | -1.042 | F  |

END

st3h.pdb

| TITLE  | st3h.pdb |    |   |        |        |        |    |
|--------|----------|----|---|--------|--------|--------|----|
| HETATM | 1        | Ru | 0 | 0.221  | -0.949 | -0.134 | Ru |
| HETATM | 2        | Cl | 0 | 0.935  | -0.741 | -2.470 | Cl |
| HETATM | 3        | Cl | 0 | -0.425 | -1.262 | 2.189  | Cl |
| HETATM | 4        | C  | 0 | -0.119 | 1.031  | 0.216  | C  |
| HETATM | 5        | N  | 0 | 0.921  | 1.836  | 0.508  | N  |
| HETATM | 6        | C  | 0 | 0.506  | 3.211  | 0.790  | C  |
| HETATM | 7        | C  | 0 | -1.024 | 3.120  | 0.725  | C  |
| HETATM | 8        | N  | 0 | -1.262 | 1.728  | 0.323  | N  |
| HETATM | 9        | C  | 0 | 2.266  | 1.393  | 0.290  | C  |
| HETATM | 10       | C  | 0 | 2.843  | 1.553  | -0.988 | C  |
| HETATM | 11       | C  | 0 | 4.112  | 1.017  | -1.216 | C  |
| HETATM | 12       | C  | 0 | 4.817  | 0.345  | -0.210 | C  |
| HETATM | 13       | C  | 0 | 4.246  | 0.252  | 1.063  | C  |
| HETATM | 14       | C  | 0 | 2.979  | 0.781  | 1.343  | C  |
| HETATM | 15       | C  | 0 | -2.559 | 1.186  | 0.082  | C  |
| HETATM | 16       | C  | 0 | -3.402 | 0.857  | 1.159  | C  |
| HETATM | 17       | C  | 0 | -4.644 | 0.277  | 0.877  | C  |
| HETATM | 18       | C  | 0 | -5.058 | 0.026  | -0.434 | C  |
| HETATM | 19       | C  | 0 | -4.214 | 0.398  | -1.488 | C  |
| HETATM | 20       | C  | 0 | -2.967 | 0.984  | -1.252 | C  |
| HETATM | 21       | C  | 0 | 2.136  | 2.308  | -2.071 | C  |
| HETATM | 22       | C  | 0 | 6.150  | -0.274 | -0.502 | C  |
| HETATM | 23       | C  | 0 | 2.424  | 0.728  | 2.731  | C  |
| HETATM | 24       | C  | 0 | -3.002 | 1.130  | 2.577  | C  |
| HETATM | 25       | C  | 0 | -6.369 | -0.648 | -0.708 | C  |
| HETATM | 26       | C  | 0 | -2.082 | 1.388  | -2.391 | C  |
| HETATM | 27       | H  | 0 | 0.927  | 3.900  | 0.033  | H  |
| HETATM | 28       | H  | 0 | 0.878  | 3.537  | 1.778  | H  |
| HETATM | 29       | H  | 0 | -1.469 | 3.810  | -0.015 | H  |
| HETATM | 30       | H  | 0 | -1.506 | 3.322  | 1.699  | H  |
| HETATM | 31       | H  | 0 | 4.554  | 1.114  | -2.216 | H  |
| HETATM | 32       | H  | 0 | 4.801  | -0.239 | 1.872  | H  |
| HETATM | 33       | H  | 0 | -5.299 | 0.002  | 1.714  | H  |
| HETATM | 34       | H  | 0 | -4.536 | 0.237  | -2.525 | H  |
| HETATM | 35       | H  | 0 | 1.043  | 2.168  | -2.035 | H  |
| HETATM | 36       | H  | 0 | 2.468  | 1.978  | -3.067 | H  |
| HETATM | 37       | H  | 0 | 2.340  | 3.395  | -1.997 | H  |
| HETATM | 38       | H  | 0 | 6.034  | -1.247 | -1.016 | H  |
| HETATM | 39       | H  | 0 | 6.728  | -0.464 | 0.418  | H  |
| HETATM | 40       | H  | 0 | 6.763  | 0.358  | -1.168 | H  |
| HETATM | 41       | H  | 0 | 3.167  | 0.322  | 3.437  | H  |
| HETATM | 42       | H  | 0 | 1.517  | 0.097  | 2.798  | H  |
| HETATM | 43       | H  | 0 | 2.137  | 1.733  | 3.092  | H  |
| HETATM | 44       | H  | 0 | -1.913 | 1.046  | 2.721  | H  |
| HETATM | 45       | H  | 0 | -3.474 | 0.411  | 3.266  | H  |
| HETATM | 46       | H  | 0 | -3.320 | 2.141  | 2.900  | H  |
| HETATM | 47       | H  | 0 | -6.247 | -1.745 | -0.785 | H  |
| HETATM | 48       | H  | 0 | -7.103 | -0.467 | 0.095  | H  |
| HETATM | 49       | H  | 0 | -6.815 | -0.312 | -1.661 | H  |
| HETATM | 50       | H  | 0 | -2.627 | 1.352  | -3.349 | H  |
| HETATM | 51       | H  | 0 | -1.197 | 0.729  | -2.488 | H  |
| HETATM | 52       | H  | 0 | -1.690 | 2.415  | -2.265 | H  |
| HETATM | 53       | C  | 0 | -1.254 | -1.909 | -0.690 | C  |
| HETATM | 54       | F  | 0 | -2.206 | -2.454 | 0.043  | F  |
| HETATM | 55       | H  | 0 | -1.504 | -2.046 | -1.765 | H  |
| HETATM | 56       | C  | 0 | 1.645  | -2.548 | -0.013 | C  |
| HETATM | 57       | C  | 0 | 0.500  | -3.193 | -0.530 | C  |
| HETATM | 58       | F  | 0 | 2.076  | -2.845 | 1.221  | F  |



|        |    |   |   |        |        |        |   |
|--------|----|---|---|--------|--------|--------|---|
| HETATM | 59 | H | 0 | 2.466  | -2.214 | -0.665 | H |
| HETATM | 60 | H | 0 | 0.482  | -3.385 | -1.610 | H |
| HETATM | 61 | H | 0 | -0.022 | -3.895 | 0.133  | H |

END

### st3NA.pdb

| TITLE  | st3NA |    |   |        |        |        |    |
|--------|-------|----|---|--------|--------|--------|----|
| HETATM | 1     | Ru | 0 | 0.004  | -0.965 | 0.007  | Ru |
| HETATM | 2     | C  | 0 | 0.755  | 3.262  | 0.085  | C  |
| HETATM | 3     | C  | 0 | -0.772 | 3.258  | -0.044 | C  |
| HETATM | 4     | H  | 0 | 1.258  | 3.798  | -0.739 | H  |
| HETATM | 5     | H  | 0 | -1.128 | 3.707  | -0.990 | H  |
| HETATM | 6     | C  | 0 | -0.003 | 1.061  | 0.010  | C  |
| HETATM | 7     | N  | 0 | -1.103 | 1.829  | -0.013 | N  |
| HETATM | 8     | N  | 0 | 1.093  | 1.835  | 0.041  | N  |
| HETATM | 9     | Cl | 0 | 0.935  | -1.001 | -2.242 | Cl |
| HETATM | 10    | Cl | 0 | -0.921 | -0.984 | 2.259  | Cl |
| HETATM | 11    | C  | 0 | 1.304  | -2.377 | 0.370  | C  |
| HETATM | 12    | C  | 0 | -2.433 | 1.310  | -0.070 | C  |
| HETATM | 13    | C  | 0 | -3.225 | 1.308  | 1.096  | C  |
| HETATM | 14    | C  | 0 | -2.921 | 0.798  | -1.287 | C  |
| HETATM | 15    | C  | 0 | -4.494 | 0.729  | 1.033  | C  |
| HETATM | 16    | C  | 0 | -4.199 | 0.226  | -1.302 | C  |
| HETATM | 17    | C  | 0 | -4.990 | 0.170  | -0.151 | C  |
| HETATM | 18    | H  | 0 | -5.108 | 0.704  | 1.943  | H  |
| HETATM | 19    | H  | 0 | -4.584 | -0.181 | -2.246 | H  |
| HETATM | 20    | C  | 0 | 2.426  | 1.319  | 0.071  | C  |
| HETATM | 21    | C  | 0 | 2.939  | 0.805  | 1.277  | C  |
| HETATM | 22    | C  | 0 | 3.193  | 1.321  | -1.111 | C  |
| HETATM | 23    | C  | 0 | 4.218  | 0.235  | 1.264  | C  |
| HETATM | 24    | C  | 0 | 4.464  | 0.744  | -1.076 | C  |
| HETATM | 25    | C  | 0 | 4.986  | 0.183  | 0.097  | C  |
| HETATM | 26    | H  | 0 | 4.622  | -0.175 | 2.198  | H  |
| HETATM | 27    | H  | 0 | 5.059  | 0.721  | -1.998 | H  |
| HETATM | 28    | C  | 0 | -2.734 | 1.920  | 2.372  | C  |
| HETATM | 29    | H  | 0 | -3.209 | 1.446  | 3.246  | H  |
| HETATM | 30    | H  | 0 | -1.644 | 1.803  | 2.493  | H  |
| HETATM | 31    | H  | 0 | -2.972 | 3.002  | 2.422  | H  |
| HETATM | 32    | C  | 0 | -2.108 | 0.857  | -2.544 | C  |
| HETATM | 33    | H  | 0 | -1.524 | 1.791  | -2.624 | H  |
| HETATM | 34    | H  | 0 | -1.369 | 0.035  | -2.608 | H  |
| HETATM | 35    | H  | 0 | -2.755 | 0.784  | -3.434 | H  |
| HETATM | 36    | C  | 0 | -6.337 | -0.487 | -0.174 | C  |
| HETATM | 37    | H  | 0 | -6.288 | -1.512 | 0.241  | H  |
| HETATM | 38    | H  | 0 | -7.075 | 0.061  | 0.437  | H  |
| HETATM | 39    | H  | 0 | -6.737 | -0.575 | -1.197 | H  |
| HETATM | 40    | C  | 0 | 2.151  | 0.860  | 2.550  | C  |
| HETATM | 41    | H  | 0 | 2.811  | 0.740  | 3.425  | H  |
| HETATM | 42    | H  | 0 | 1.606  | 1.814  | 2.665  | H  |
| HETATM | 43    | H  | 0 | 1.382  | 0.065  | 2.607  | H  |
| HETATM | 44    | C  | 0 | 2.670  | 1.931  | -2.375 | C  |
| HETATM | 45    | H  | 0 | 2.879  | 3.019  | -2.420 | H  |
| HETATM | 46    | H  | 0 | 3.146  | 1.476  | -3.260 | H  |
| HETATM | 47    | H  | 0 | 1.582  | 1.785  | -2.484 | H  |
| HETATM | 48    | C  | 0 | 6.333  | -0.472 | 0.090  | C  |
| HETATM | 49    | H  | 0 | 6.278  | -1.494 | -0.330 | H  |
| HETATM | 50    | H  | 0 | 7.059  | 0.082  | -0.531 | H  |
| HETATM | 51    | H  | 0 | 6.753  | -0.565 | 1.106  | H  |
| HETATM | 52    | H  | 0 | -1.278 | 3.785  | 0.785  | H  |
| HETATM | 53    | H  | 0 | 1.108  | 3.704  | 1.035  | H  |
| HETATM | 54    | C  | 0 | 0.008  | -3.184 | 0.015  | C  |

|        |    |   |   |        |        |        |   |
|--------|----|---|---|--------|--------|--------|---|
| HETATM | 55 | H | 0 | 0.230  | -3.790 | -0.879 | H |
| HETATM | 56 | H | 0 | -0.212 | -3.786 | 0.913  | H |
| HETATM | 57 | C | 0 | -1.291 | -2.383 | -0.342 | C |
| HETATM | 58 | H | 0 | -2.117 | -2.497 | 0.379  | H |
| HETATM | 59 | H | 0 | 2.132  | -2.493 | -0.349 | H |
| HETATM | 60 | F | 0 | 1.754  | -2.606 | 1.622  | F |
| HETATM | 61 | F | 0 | -1.743 | -2.622 | -1.592 | F |

END

### st3i.pdb

| TITLE  | st3i.pdb |    |   |        |        |        |    |
|--------|----------|----|---|--------|--------|--------|----|
| HETATM | 1        | Ru | 0 | 0.221  | -0.949 | -0.134 | Ru |
| HETATM | 2        | Cl | 0 | 0.935  | -0.741 | -2.470 | Cl |
| HETATM | 3        | Cl | 0 | -0.425 | -1.262 | 2.189  | Cl |
| HETATM | 4        | C  | 0 | -0.119 | 1.031  | 0.216  | C  |
| HETATM | 5        | N  | 0 | 0.921  | 1.836  | 0.508  | N  |
| HETATM | 6        | C  | 0 | 0.506  | 3.211  | 0.790  | C  |
| HETATM | 7        | C  | 0 | -1.024 | 3.120  | 0.725  | C  |
| HETATM | 8        | N  | 0 | -1.262 | 1.728  | 0.323  | N  |
| HETATM | 9        | C  | 0 | 2.266  | 1.393  | 0.290  | C  |
| HETATM | 10       | C  | 0 | 2.843  | 1.553  | -0.988 | C  |
| HETATM | 11       | C  | 0 | 4.112  | 1.017  | -1.216 | C  |
| HETATM | 12       | C  | 0 | 4.817  | 0.345  | -0.210 | C  |
| HETATM | 13       | C  | 0 | 4.246  | 0.252  | 1.063  | C  |
| HETATM | 14       | C  | 0 | 2.979  | 0.781  | 1.343  | C  |
| HETATM | 15       | C  | 0 | -2.559 | 1.186  | 0.082  | C  |
| HETATM | 16       | C  | 0 | -3.402 | 0.857  | 1.159  | C  |
| HETATM | 17       | C  | 0 | -4.644 | 0.277  | 0.877  | C  |
| HETATM | 18       | C  | 0 | -5.058 | 0.026  | -0.434 | C  |
| HETATM | 19       | C  | 0 | -4.214 | 0.398  | -1.488 | C  |
| HETATM | 20       | C  | 0 | -2.967 | 0.984  | -1.252 | C  |
| HETATM | 21       | C  | 0 | 2.136  | 2.308  | -2.071 | C  |
| HETATM | 22       | C  | 0 | 6.150  | -0.274 | -0.502 | C  |
| HETATM | 23       | C  | 0 | 2.424  | 0.728  | 2.731  | C  |
| HETATM | 24       | C  | 0 | -3.002 | 1.130  | 2.577  | C  |
| HETATM | 25       | C  | 0 | -6.369 | -0.648 | -0.708 | C  |
| HETATM | 26       | C  | 0 | -2.082 | 1.388  | -2.391 | C  |
| HETATM | 27       | H  | 0 | 0.927  | 3.900  | 0.033  | H  |
| HETATM | 28       | H  | 0 | 0.878  | 3.537  | 1.778  | H  |
| HETATM | 29       | H  | 0 | -1.469 | 3.810  | -0.015 | H  |
| HETATM | 30       | H  | 0 | -1.506 | 3.322  | 1.699  | H  |
| HETATM | 31       | H  | 0 | 4.554  | 1.114  | -2.216 | H  |
| HETATM | 32       | H  | 0 | 4.801  | -0.239 | 1.872  | H  |
| HETATM | 33       | H  | 0 | -5.299 | 0.002  | 1.714  | H  |
| HETATM | 34       | H  | 0 | -4.536 | 0.237  | -2.525 | H  |
| HETATM | 35       | H  | 0 | 1.043  | 2.168  | -2.035 | H  |
| HETATM | 36       | H  | 0 | 2.468  | 1.978  | -3.067 | H  |
| HETATM | 37       | H  | 0 | 2.340  | 3.395  | -1.997 | H  |
| HETATM | 38       | H  | 0 | 6.034  | -1.247 | -1.016 | H  |
| HETATM | 39       | H  | 0 | 6.728  | -0.464 | 0.418  | H  |
| HETATM | 40       | H  | 0 | 6.763  | 0.358  | -1.168 | H  |
| HETATM | 41       | H  | 0 | 3.167  | 0.322  | 3.437  | H  |
| HETATM | 42       | H  | 0 | 1.517  | 0.097  | 2.798  | H  |
| HETATM | 43       | H  | 0 | 2.137  | 1.733  | 3.092  | H  |
| HETATM | 44       | H  | 0 | -1.913 | 1.046  | 2.721  | H  |
| HETATM | 45       | H  | 0 | -3.474 | 0.411  | 3.266  | H  |
| HETATM | 46       | H  | 0 | -3.320 | 2.141  | 2.900  | H  |
| HETATM | 47       | H  | 0 | -6.247 | -1.745 | -0.785 | H  |
| HETATM | 48       | H  | 0 | -7.103 | -0.467 | 0.095  | H  |
| HETATM | 49       | H  | 0 | -6.815 | -0.312 | -1.661 | H  |
| HETATM | 50       | H  | 0 | -2.627 | 1.352  | -3.349 | H  |

|        |    |   |   |        |        |        |   |
|--------|----|---|---|--------|--------|--------|---|
| HETATM | 51 | H | 0 | -1.197 | 0.729  | -2.488 | H |
| HETATM | 52 | H | 0 | -1.690 | 2.415  | -2.265 | H |
| HETATM | 53 | C | 0 | -1.254 | -1.909 | -0.690 | C |
| HETATM | 54 | F | 0 | -2.206 | -2.454 | 0.043  | F |
| HETATM | 55 | H | 0 | -1.504 | -2.046 | -1.765 | H |
| HETATM | 56 | C | 0 | 1.645  | -2.548 | -0.013 | C |
| HETATM | 57 | C | 0 | 0.500  | -3.193 | -0.530 | C |
| HETATM | 58 | F | 0 | 2.076  | -2.845 | 1.221  | F |
| HETATM | 59 | H | 0 | 2.466  | -2.214 | -0.665 | H |
| HETATM | 60 | H | 0 | 0.482  | -3.385 | -1.610 | H |
| HETATM | 61 | H | 0 | -0.022 | -3.895 | 0.133  | H |

END

### st3j.pdb

|        |          |    |   |        |        |        |    |
|--------|----------|----|---|--------|--------|--------|----|
| TITLE  | st3j.pdb |    |   |        |        |        |    |
| HETATM | 1        | Ru | 0 | 0.238  | -0.976 | 0.076  | Ru |
| HETATM | 2        | C  | 0 | 0.326  | 3.236  | 0.200  | C  |
| HETATM | 3        | C  | 0 | -1.196 | 3.094  | 0.269  | C  |
| HETATM | 4        | H  | 0 | 0.666  | 3.742  | -0.724 | H  |
| HETATM | 5        | H  | 0 | -1.720 | 3.622  | -0.548 | H  |
| HETATM | 6        | C  | 0 | -0.242 | 0.956  | 0.123  | C  |
| HETATM | 7        | N  | 0 | -1.403 | 1.648  | 0.149  | N  |
| HETATM | 8        | N  | 0 | 0.779  | 1.848  | 0.213  | N  |
| HETATM | 9        | Cl | 0 | 0.756  | -1.132 | -2.297 | Cl |
| HETATM | 10       | Cl | 0 | 0.054  | -1.049 | 2.495  | Cl |
| HETATM | 11       | C  | 0 | 2.089  | -2.697 | 0.130  | C  |
| HETATM | 12       | C  | 0 | -2.706 | 1.085  | 0.029  | C  |
| HETATM | 13       | C  | 0 | -3.482 | 0.869  | 1.183  | C  |
| HETATM | 14       | C  | 0 | -3.184 | 0.737  | -1.250 | C  |
| HETATM | 15       | C  | 0 | -4.748 | 0.289  | 1.033  | C  |
| HETATM | 16       | C  | 0 | -4.453 | 0.157  | -1.353 | C  |
| HETATM | 17       | C  | 0 | -5.245 | -0.078 | -0.223 | C  |
| HETATM | 18       | H  | 0 | -5.356 | 0.108  | 1.929  | H  |
| HETATM | 19       | H  | 0 | -4.829 | -0.121 | -2.346 | H  |
| HETATM | 20       | C  | 0 | 2.143  | 1.454  | 0.030  | C  |
| HETATM | 21       | C  | 0 | 2.950  | 1.184  | 1.157  | C  |
| HETATM | 22       | C  | 0 | 2.672  | 1.383  | -1.276 | C  |
| HETATM | 23       | C  | 0 | 4.253  | 0.722  | 0.944  | C  |
| HETATM | 24       | C  | 0 | 3.981  | 0.919  | -1.439 | C  |
| HETATM | 25       | C  | 0 | 4.774  | 0.557  | -0.345 | C  |
| HETATM | 26       | H  | 0 | 4.879  | 0.490  | 1.815  | H  |
| HETATM | 27       | H  | 0 | 4.389  | 0.836  | -2.455 | H  |
| HETATM | 28       | C  | 0 | -2.943 | 1.192  | 2.541  | C  |
| HETATM | 29       | H  | 0 | -3.641 | 0.874  | 3.332  | H  |
| HETATM | 30       | H  | 0 | -1.975 | 0.683  | 2.719  | H  |
| HETATM | 31       | H  | 0 | -2.768 | 2.276  | 2.681  | H  |
| HETATM | 32       | C  | 0 | -2.332 | 0.946  | -2.463 | C  |
| HETATM | 33       | H  | 0 | -1.911 | 1.968  | -2.505 | H  |
| HETATM | 34       | H  | 0 | -1.466 | 0.253  | -2.483 | H  |
| HETATM | 35       | H  | 0 | -2.908 | 0.782  | -3.389 | H  |
| HETATM | 36       | C  | 0 | -6.585 | -0.737 | -0.355 | C  |
| HETATM | 37       | H  | 0 | -6.488 | -1.839 | -0.385 | H  |
| HETATM | 38       | H  | 0 | -7.248 | -0.499 | 0.494  | H  |
| HETATM | 39       | H  | 0 | -7.100 | -0.442 | -1.285 | H  |
| HETATM | 40       | C  | 0 | 2.457  | 1.450  | 2.544  | C  |
| HETATM | 41       | H  | 0 | 3.206  | 1.148  | 3.294  | H  |
| HETATM | 42       | H  | 0 | 2.257  | 2.528  | 2.696  | H  |
| HETATM | 43       | H  | 0 | 1.523  | 0.907  | 2.767  | H  |
| HETATM | 44       | C  | 0 | 1.897  | 1.865  | -2.464 | C  |
| HETATM | 45       | H  | 0 | 2.102  | 2.939  | -2.652 | H  |
| HETATM | 46       | H  | 0 | 2.180  | 1.311  | -3.374 | H  |

|        |    |   |   |        |        |        |   |
|--------|----|---|---|--------|--------|--------|---|
| HETATM | 47 | H | 0 | 0.809  | 1.741  | -2.345 | H |
| HETATM | 48 | C | 0 | 6.150  | 0.000  | -0.546 | C |
| HETATM | 49 | H | 0 | 6.126  | -1.105 | -0.605 | H |
| HETATM | 50 | H | 0 | 6.608  | 0.357  | -1.483 | H |
| HETATM | 51 | H | 0 | 6.826  | 0.256  | 0.288  | H |
| HETATM | 52 | H | 0 | -1.615 | 3.466  | 1.223  | H |
| HETATM | 53 | H | 0 | 0.747  | 3.793  | 1.056  | H |
| HETATM | 54 | C | 0 | 0.931  | -3.390 | 0.210  | C |
| HETATM | 55 | H | 0 | 0.432  | -3.681 | -0.718 | H |
| HETATM | 56 | C | 0 | -1.432 | -1.639 | -0.119 | C |
| HETATM | 57 | H | 0 | -2.291 | -1.442 | 0.557  | H |
| HETATM | 58 | H | 0 | 0.569  | -3.776 | 1.169  | H |
| HETATM | 59 | H | 0 | 2.560  | -2.361 | -0.803 | H |
| HETATM | 60 | F | 0 | 2.832  | -2.441 | 1.204  | F |
| HETATM | 61 | F | 0 | -1.820 | -2.512 | -1.042 | F |

END

### ac3g.pdb

| TITLE  | ac3g.pdb |    |   |        |        |        |    |
|--------|----------|----|---|--------|--------|--------|----|
| HETATM | 1        | Ru | 0 | -0.286 | 0.907  | 0.257  | Ru |
| HETATM | 2        | C  | 0 | -0.525 | -3.285 | -0.211 | C  |
| HETATM | 3        | C  | 0 | 0.999  | -3.198 | -0.113 | C  |
| HETATM | 4        | H  | 0 | -0.869 | -3.633 | -1.204 | H  |
| HETATM | 5        | H  | 0 | 1.518  | -3.650 | -0.976 | H  |
| HETATM | 6        | C  | 0 | 0.108  | -1.034 | 0.020  | C  |
| HETATM | 7        | N  | 0 | 1.248  | -1.755 | -0.071 | N  |
| HETATM | 8        | N  | 0 | -0.938 | -1.902 | 0.011  | N  |
| HETATM | 9        | Cl | 0 | -0.866 | 1.359  | -2.048 | Cl |
| HETATM | 10       | Cl | 0 | 0.017  | 0.694  | 2.677  | Cl |
| HETATM | 11       | C  | 0 | -1.837 | 2.665  | 0.680  | C  |
| HETATM | 12       | C  | 0 | 2.565  | -1.218 | -0.137 | C  |
| HETATM | 13       | C  | 0 | 3.370  | -1.187 | 1.018  | C  |
| HETATM | 14       | C  | 0 | 3.034  | -0.720 | -1.369 | C  |
| HETATM | 15       | C  | 0 | 4.649  | -0.626 | 0.921  | C  |
| HETATM | 16       | C  | 0 | 4.318  | -0.166 | -1.420 | C  |
| HETATM | 17       | C  | 0 | 5.134  | -0.104 | -0.285 | C  |
| HETATM | 18       | H  | 0 | 5.279  | -0.589 | 1.819  | H  |
| HETATM | 19       | H  | 0 | 4.686  | 0.228  | -2.376 | H  |
| HETATM | 20       | C  | 0 | -2.291 | -1.444 | -0.080 | C  |
| HETATM | 21       | C  | 0 | -3.043 | -1.264 | 1.101  | C  |
| HETATM | 22       | C  | 0 | -2.859 | -1.196 | -1.347 | C  |
| HETATM | 23       | C  | 0 | -4.324 | -0.712 | 0.994  | C  |
| HETATM | 24       | C  | 0 | -4.144 | -0.649 | -1.405 | C  |
| HETATM | 25       | C  | 0 | -4.878 | -0.374 | -0.247 | C  |
| HETATM | 26       | H  | 0 | -4.911 | -0.558 | 1.909  | H  |
| HETATM | 27       | H  | 0 | -4.578 | -0.426 | -2.388 | H  |
| HETATM | 28       | C  | 0 | 2.856  | -1.700 | 2.327  | C  |
| HETATM | 29       | H  | 0 | 3.541  | -1.442 | 3.152  | H  |
| HETATM | 30       | H  | 0 | 1.865  | -1.270 | 2.567  | H  |
| HETATM | 31       | H  | 0 | 2.747  | -2.802 | 2.334  | H  |
| HETATM | 32       | C  | 0 | 2.163  | -0.753 | -2.585 | C  |
| HETATM | 33       | H  | 0 | 1.677  | -1.736 | -2.722 | H  |
| HETATM | 34       | H  | 0 | 1.343  | -0.008 | -2.523 | H  |
| HETATM | 35       | H  | 0 | 2.741  | -0.531 | -3.497 | H  |
| HETATM | 36       | C  | 0 | 6.490  | 0.531  | -0.352 | C  |
| HETATM | 37       | H  | 0 | 6.429  | 1.623  | -0.178 | H  |
| HETATM | 38       | H  | 0 | 7.175  | 0.126  | 0.411  | H  |
| HETATM | 39       | H  | 0 | 6.960  | 0.398  | -1.341 | H  |
| HETATM | 40       | C  | 0 | -2.510 | -1.700 | 2.431  | C  |
| HETATM | 41       | H  | 0 | -3.259 | -1.549 | 3.224  | H  |

|        |    |   |   |        |        |        |   |
|--------|----|---|---|--------|--------|--------|---|
| HETATM | 42 | H | 0 | -2.246 | -2.774 | 2.426  | H |
| HETATM | 43 | H | 0 | -1.598 | -1.144 | 2.718  | H |
| HETATM | 44 | C | 0 | -2.141 | -1.559 | -2.611 | C |
| HETATM | 45 | H | 0 | -2.378 | -2.601 | -2.909 | H |
| HETATM | 46 | H | 0 | -2.442 | -0.903 | -3.443 | H |
| HETATM | 47 | H | 0 | -1.047 | -1.471 | -2.518 | H |
| HETATM | 48 | C | 0 | -6.226 | 0.273  | -0.333 | C |
| HETATM | 49 | H | 0 | -6.137 | 1.376  | -0.365 | H |
| HETATM | 50 | H | 0 | -6.769 | -0.023 | -1.247 | H |
| HETATM | 51 | H | 0 | -6.860 | 0.030  | 0.536  | H |
| HETATM | 52 | H | 0 | 1.393  | -3.681 | 0.801  | H |
| HETATM | 53 | H | 0 | -0.969 | -3.955 | 0.547  | H |
| HETATM | 54 | C | 0 | -0.701 | 3.382  | 0.865  | C |
| HETATM | 55 | C | 0 | 1.413  | 1.513  | 0.090  | C |
| HETATM | 56 | H | 0 | 2.252  | 1.280  | 0.783  | H |
| HETATM | 57 | H | 0 | -2.261 | 2.136  | 1.542  | H |
| HETATM | 58 | H | 0 | -0.122 | 3.408  | 1.796  | H |
| HETATM | 59 | H | 0 | -2.427 | 2.777  | -0.236 | H |
| HETATM | 60 | F | 0 | 1.847  | 2.368  | -0.823 | F |
| HETATM | 61 | F | 0 | -0.247 | 4.218  | -0.055 | F |

END

### ac3h.pdb

| TITLE  | ac3h.pdb |    |   |        |        |        |    |
|--------|----------|----|---|--------|--------|--------|----|
| HETATM | 1        | Ru | 0 | -0.038 | 0.956  | 0.255  | Ru |
| HETATM | 2        | Cl | 0 | 0.843  | 0.654  | 2.523  | Cl |
| HETATM | 3        | Cl | 0 | -1.100 | 1.326  | -1.883 | Cl |
| HETATM | 4        | C  | 0 | -0.094 | -1.076 | -0.043 | C  |
| HETATM | 5        | N  | 0 | 0.982  | -1.871 | -0.176 | N  |
| HETATM | 6        | C  | 0 | 0.616  | -3.281 | -0.356 | C  |
| HETATM | 7        | C  | 0 | -0.908 | -3.260 | -0.217 | C  |
| HETATM | 8        | N  | 0 | -1.206 | -1.831 | -0.079 | N  |
| HETATM | 9        | C  | 0 | 2.329  | -1.400 | -0.224 | C  |
| HETATM | 10       | C  | 0 | 3.157  | -1.538 | 0.905  | C  |
| HETATM | 11       | C  | 0 | 4.453  | -1.015 | 0.844  | C  |
| HETATM | 12       | C  | 0 | 4.935  | -0.377 | -0.305 | C  |
| HETATM | 13       | C  | 0 | 4.099  | -0.287 | -1.424 | C  |
| HETATM | 14       | C  | 0 | 2.797  | -0.796 | -1.407 | C  |
| HETATM | 15       | C  | 0 | -2.532 | -1.300 | -0.019 | C  |
| HETATM | 16       | C  | 0 | -3.270 | -1.159 | -1.209 | C  |
| HETATM | 17       | C  | 0 | -4.540 | -0.581 | -1.138 | C  |
| HETATM | 18       | C  | 0 | -5.081 | -0.143 | 0.076  | C  |
| HETATM | 19       | C  | 0 | -4.339 | -0.328 | 1.247  | C  |
| HETATM | 20       | C  | 0 | -3.067 | -0.913 | 1.224  | C  |
| HETATM | 21       | C  | 0 | 2.683  | -2.243 | 2.140  | C  |
| HETATM | 22       | C  | 0 | 6.311  | 0.217  | -0.326 | C  |
| HETATM | 23       | C  | 0 | 1.919  | -0.689 | -2.616 | C  |
| HETATM | 24       | C  | 0 | -2.713 | -1.605 | -2.526 | C  |
| HETATM | 25       | C  | 0 | -6.420 | 0.529  | 0.114  | C  |
| HETATM | 26       | C  | 0 | -2.306 | -1.132 | 2.496  | C  |
| HETATM | 27       | H  | 0 | 1.112  | -3.903 | 0.410  | H  |
| HETATM | 28       | H  | 0 | 0.957  | -3.639 | -1.345 | H  |
| HETATM | 29       | H  | 0 | -1.270 | -3.811 | 0.671  | H  |
| HETATM | 30       | H  | 0 | -1.429 | -3.676 | -1.098 | H  |
| HETATM | 31       | H  | 0 | 5.099  | -1.101 | 1.727  | H  |
| HETATM | 32       | H  | 0 | 4.469  | 0.191  | -2.341 | H  |
| HETATM | 33       | H  | 0 | -5.111 | -0.445 | -2.066 | H  |
| HETATM | 34       | H  | 0 | -4.762 | -0.018 | 2.212  | H  |
| HETATM | 35       | H  | 0 | 1.597  | -2.131 | 2.288  | H  |
| HETATM | 36       | H  | 0 | 3.174  | -1.837 | 3.040  | H  |
| HETATM | 37       | H  | 0 | 2.917  | -3.325 | 2.102  | H  |

|        |    |   |   |        |        |        |   |
|--------|----|---|---|--------|--------|--------|---|
| HETATM | 38 | H | 0 | 7.022  | -0.365 | 0.287  | H |
| HETATM | 39 | H | 0 | 6.311  | 1.245  | 0.085  | H |
| HETATM | 40 | H | 0 | 6.717  | 0.284  | -1.349 | H |
| HETATM | 41 | H | 0 | 2.497  | -0.371 | -3.499 | H |
| HETATM | 42 | H | 0 | 1.098  | 0.041  | -2.479 | H |
| HETATM | 43 | H | 0 | 1.433  | -1.652 | -2.863 | H |
| HETATM | 44 | H | 0 | -1.622 | -1.451 | -2.580 | H |
| HETATM | 45 | H | 0 | -3.161 | -1.036 | -3.357 | H |
| HETATM | 46 | H | 0 | -2.921 | -2.677 | -2.719 | H |
| HETATM | 47 | H | 0 | -7.115 | 0.108  | -0.633 | H |
| HETATM | 48 | H | 0 | -6.331 | 1.608  | -0.114 | H |
| HETATM | 49 | H | 0 | -6.895 | 0.450  | 1.106  | H |
| HETATM | 50 | H | 0 | -2.945 | -0.945 | 3.375  | H |
| HETATM | 51 | H | 0 | -1.419 | -0.476 | 2.589  | H |
| HETATM | 52 | H | 0 | -1.923 | -2.167 | 2.575  | H |
| HETATM | 53 | C | 0 | -1.108 | 2.588  | 0.977  | C |
| HETATM | 54 | H | 0 | -1.343 | 2.380  | 2.030  | H |
| HETATM | 55 | H | 0 | -1.936 | 2.859  | 0.307  | H |
| HETATM | 56 | C | 0 | 1.517  | 1.908  | -0.072 | C |
| HETATM | 57 | C | 0 | 0.160  | 3.198  | 0.689  | C |
| HETATM | 58 | F | 0 | 1.880  | 2.422  | -1.237 | F |
| HETATM | 59 | F | 0 | 0.192  | 4.106  | -0.300 | F |
| HETATM | 60 | H | 0 | 2.366  | 1.952  | 0.641  | H |
| HETATM | 61 | H | 0 | 0.817  | 3.473  | 1.528  | H |

END

### ac3PA.pdb

| TITLE  | ac3PA.pdb |    |   |        |        |        |    |
|--------|-----------|----|---|--------|--------|--------|----|
| HETATM | 1         | Ru | 0 | 0.039  | 0.905  | 0.204  | Ru |
| HETATM | 2         | Cl | 0 | 0.937  | 0.439  | 2.452  | Cl |
| HETATM | 3         | Cl | 0 | -1.011 | 1.413  | -1.888 | Cl |
| HETATM | 4         | C  | 0 | -0.128 | -1.086 | -0.080 | C  |
| HETATM | 5         | N  | 0 | 0.935  | -1.889 | -0.250 | N  |
| HETATM | 6         | C  | 0 | 0.534  | -3.275 | -0.511 | C  |
| HETATM | 7         | C  | 0 | -0.977 | -3.242 | -0.270 | C  |
| HETATM | 8         | N  | 0 | -1.257 | -1.809 | -0.121 | N  |
| HETATM | 9         | C  | 0 | 2.283  | -1.417 | -0.289 | C  |
| HETATM | 10        | C  | 0 | 3.130  | -1.661 | 0.811  | C  |
| HETATM | 11        | C  | 0 | 4.422  | -1.132 | 0.782  | C  |
| HETATM | 12        | C  | 0 | 4.886  | -0.380 | -0.306 | C  |
| HETATM | 13        | C  | 0 | 4.039  | -0.191 | -1.400 | C  |
| HETATM | 14        | C  | 0 | 2.737  | -0.709 | -1.420 | C  |
| HETATM | 15        | C  | 0 | -2.574 | -1.258 | -0.033 | C  |
| HETATM | 16        | C  | 0 | -3.320 | -1.076 | -1.213 | C  |
| HETATM | 17        | C  | 0 | -4.583 | -0.488 | -1.116 | C  |
| HETATM | 18        | C  | 0 | -5.112 | -0.082 | 0.114  | C  |
| HETATM | 19        | C  | 0 | -4.361 | -0.306 | 1.274  | C  |
| HETATM | 20        | C  | 0 | -3.095 | -0.899 | 1.224  | C  |
| HETATM | 21        | C  | 0 | 2.673  | -2.478 | 1.980  | C  |
| HETATM | 22        | C  | 0 | 6.261  | 0.215  | -0.286 | C  |
| HETATM | 23        | C  | 0 | 1.876  | -0.515 | -2.630 | C  |
| HETATM | 24        | C  | 0 | -2.778 | -1.494 | -2.545 | C  |
| HETATM | 25        | C  | 0 | -6.444 | 0.600  | 0.183  | C  |
| HETATM | 26        | C  | 0 | -2.321 | -1.154 | 2.481  | C  |
| HETATM | 27        | H  | 0 | 1.066  | -3.964 | 0.169  | H  |
| HETATM | 28        | H  | 0 | 0.801  | -3.556 | -1.548 | H  |
| HETATM | 29        | H  | 0 | -1.280 | -3.782 | 0.647  | H  |
| HETATM | 30        | H  | 0 | -1.559 | -3.660 | -1.110 | H  |
| HETATM | 31        | H  | 0 | 5.081  | -1.300 | 1.644  | H  |
| HETATM | 32        | H  | 0 | 4.396  | 0.369  | -2.273 | H  |
| HETATM | 33        | H  | 0 | -5.161 | -0.322 | -2.035 | H  |

|        |    |   |   |        |        |        |   |
|--------|----|---|---|--------|--------|--------|---|
| HETATM | 34 | H | 0 | -4.773 | -0.017 | 2.250  | H |
| HETATM | 35 | H | 0 | 1.599  | -2.336 | 2.185  | H |
| HETATM | 36 | H | 0 | 3.218  | -2.198 | 2.896  | H |
| HETATM | 37 | H | 0 | 2.852  | -3.559 | 1.816  | H |
| HETATM | 38 | H | 0 | 7.003  | -0.472 | 0.158  | H |
| HETATM | 39 | H | 0 | 6.289  | 1.139  | 0.323  | H |
| HETATM | 40 | H | 0 | 6.608  | 0.487  | -1.297 | H |
| HETATM | 41 | H | 0 | 2.495  | -0.410 | -3.537 | H |
| HETATM | 42 | H | 0 | 1.243  | 0.391  | -2.562 | H |
| HETATM | 43 | H | 0 | 1.178  | -1.356 | -2.790 | H |
| HETATM | 44 | H | 0 | -1.697 | -1.288 | -2.627 | H |
| HETATM | 45 | H | 0 | -3.274 | -0.946 | -3.363 | H |
| HETATM | 46 | H | 0 | -2.938 | -2.574 | -2.737 | H |
| HETATM | 47 | H | 0 | -7.151 | 0.203  | -0.565 | H |
| HETATM | 48 | H | 0 | -6.348 | 1.683  | -0.020 | H |
| HETATM | 49 | H | 0 | -6.909 | 0.502  | 1.179  | H |
| HETATM | 50 | H | 0 | -2.924 | -0.917 | 3.373  | H |
| HETATM | 51 | H | 0 | -1.391 | -0.556 | 2.540  | H |
| HETATM | 52 | H | 0 | -2.007 | -2.211 | 2.565  | H |
| HETATM | 53 | C | 0 | -1.027 | 2.329  | 1.092  | C |
| HETATM | 54 | H | 0 | -1.228 | 2.175  | 2.164  | H |
| HETATM | 55 | H | 0 | -1.870 | 2.721  | 0.501  | H |
| HETATM | 56 | C | 0 | 1.493  | 2.190  | 0.176  | C |
| HETATM | 57 | C | 0 | 0.282  | 3.072  | 0.787  | C |
| HETATM | 58 | F | 0 | 1.928  | 2.704  | -0.989 | F |
| HETATM | 59 | F | 0 | 0.078  | 4.126  | -0.053 | F |
| HETATM | 60 | H | 0 | 2.339  | 2.057  | 0.870  | H |
| HETATM | 61 | H | 0 | 0.700  | 3.424  | 1.748  | H |

END

### ac3i.pdb

| TITLE  | ac3i.pdb |    |   |        |        |        |    |
|--------|----------|----|---|--------|--------|--------|----|
| HETATM | 1        | Ru | 0 | -0.201 | 0.866  | -0.170 | Ru |
| HETATM | 2        | Cl | 0 | -0.909 | 0.547  | -2.500 | Cl |
| HETATM | 3        | Cl | 0 | 0.494  | 1.365  | 2.102  | Cl |
| HETATM | 4        | C  | 0 | 0.234  | -1.072 | 0.237  | C  |
| HETATM | 5        | N  | 0 | -0.772 | -1.909 | 0.555  | N  |
| HETATM | 6        | C  | 0 | -0.303 | -3.256 | 0.878  | C  |
| HETATM | 7        | C  | 0 | 1.222  | -3.107 | 0.801  | C  |
| HETATM | 8        | N  | 0 | 1.405  | -1.718 | 0.363  | N  |
| HETATM | 9        | C  | 0 | -2.133 | -1.518 | 0.348  | C  |
| HETATM | 10       | C  | 0 | -2.732 | -1.758 | -0.909 | C  |
| HETATM | 11       | C  | 0 | -4.020 | -1.272 | -1.135 | C  |
| HETATM | 12       | C  | 0 | -4.725 | -0.572 | -0.147 | C  |
| HETATM | 13       | C  | 0 | -4.129 | -0.394 | 1.104  | C  |
| HETATM | 14       | C  | 0 | -2.838 | -0.866 | 1.381  | C  |
| HETATM | 15       | C  | 0 | 2.681  | -1.132 | 0.114  | C  |
| HETATM | 16       | C  | 0 | 3.496  | -0.730 | 1.187  | C  |
| HETATM | 17       | C  | 0 | 4.716  | -0.108 | 0.896  | C  |
| HETATM | 18       | C  | 0 | 5.137  | 0.109  | -0.420 | C  |
| HETATM | 19       | C  | 0 | 4.318  | -0.332 | -1.468 | C  |
| HETATM | 20       | C  | 0 | 3.092  | -0.957 | -1.222 | C  |
| HETATM | 21       | C  | 0 | -2.017 | -2.533 | -1.972 | C  |
| HETATM | 22       | C  | 0 | -6.089 | -0.022 | -0.438 | C  |
| HETATM | 23       | C  | 0 | -2.252 | -0.683 | 2.746  | C  |
| HETATM | 24       | C  | 0 | 3.090  | -0.968 | 2.609  | C  |
| HETATM | 25       | C  | 0 | 6.425  | 0.820  | -0.705 | C  |
| HETATM | 26       | C  | 0 | 2.225  | -1.420 | -2.352 | C  |
| HETATM | 27       | H  | 0 | -0.701 | -3.984 | 0.147  | H  |
| HETATM | 28       | H  | 0 | -0.657 | -3.564 | 1.878  | H  |
| HETATM | 29       | H  | 0 | 1.690  | -3.798 | 0.076  | H  |

|        |    |   |   |        |        |        |   |
|--------|----|---|---|--------|--------|--------|---|
| HETATM | 30 | H | 0 | 1.717  | -3.266 | 1.777  | H |
| HETATM | 31 | H | 0 | -4.479 | -1.431 | -2.120 | H |
| HETATM | 32 | H | 0 | -4.681 | 0.123  | 1.899  | H |
| HETATM | 33 | H | 0 | 5.350  | 0.224  | 1.728  | H |
| HETATM | 34 | H | 0 | 4.644  | -0.192 | -2.507 | H |
| HETATM | 35 | H | 0 | -0.930 | -2.346 | -1.966 | H |
| HETATM | 36 | H | 0 | -2.382 | -2.259 | -2.974 | H |
| HETATM | 37 | H | 0 | -2.175 | -3.624 | -1.849 | H |
| HETATM | 38 | H | 0 | -6.716 | -0.745 | -0.988 | H |
| HETATM | 39 | H | 0 | -6.029 | 0.882  | -1.073 | H |
| HETATM | 40 | H | 0 | -6.625 | 0.263  | 0.483  | H |
| HETATM | 41 | H | 0 | -3.047 | -0.553 | 3.498  | H |
| HETATM | 42 | H | 0 | -1.590 | 0.203  | 2.797  | H |
| HETATM | 43 | H | 0 | -1.629 | -1.542 | 3.052  | H |
| HETATM | 44 | H | 0 | 1.996  | -0.943 | 2.734  | H |
| HETATM | 45 | H | 0 | 3.508  | -0.195 | 3.275  | H |
| HETATM | 46 | H | 0 | 3.461  | -1.945 | 2.977  | H |
| HETATM | 47 | H | 0 | 7.162  | 0.681  | 0.104  | H |
| HETATM | 48 | H | 0 | 6.268  | 1.911  | -0.805 | H |
| HETATM | 49 | H | 0 | 6.885  | 0.479  | -1.649 | H |
| HETATM | 50 | H | 0 | 2.767  | -1.383 | -3.312 | H |
| HETATM | 51 | H | 0 | 1.314  | -0.798 | -2.461 | H |
| HETATM | 52 | H | 0 | 1.874  | -2.459 | -2.205 | H |
| HETATM | 53 | C | 0 | 1.242  | 1.848  | -0.755 | C |
| HETATM | 54 | H | 0 | 1.521  | 1.868  | -1.830 | H |
| HETATM | 55 | H | 0 | 1.858  | 2.454  | -0.062 | H |
| HETATM | 56 | C | 0 | -1.731 | 2.387  | -0.117 | C |
| HETATM | 57 | C | 0 | -0.679 | 3.128  | -0.691 | C |
| HETATM | 58 | F | 0 | -2.189 | 2.764  | 1.082  | F |
| HETATM | 59 | F | 0 | -0.170 | 4.130  | 0.019  | F |
| HETATM | 60 | H | 0 | -2.494 | 1.913  | -0.752 | H |
| HETATM | 61 | H | 0 | -0.580 | 3.229  | -1.778 | H |

END

### ac3j.pdb

| TITLE  | ac3j.pdb |    |   |        |        |        |    |
|--------|----------|----|---|--------|--------|--------|----|
| HETATM | 1        | Ru | 0 | -0.252 | 0.834  | -0.151 | Ru |
| HETATM | 2        | C  | 0 | 0.071  | -3.225 | 0.807  | C  |
| HETATM | 3        | C  | 0 | 1.562  | -2.899 | 0.906  | C  |
| HETATM | 4        | H  | 0 | -0.163 | -3.882 | -0.055 | H  |
| HETATM | 5        | H  | 0 | 2.193  | -3.545 | 0.270  | H  |
| HETATM | 6        | C  | 0 | 0.402  | -0.956 | 0.319  | C  |
| HETATM | 7        | N  | 0 | 1.629  | -1.507 | 0.448  | N  |
| HETATM | 8        | N  | 0 | -0.528 | -1.906 | 0.617  | N  |
| HETATM | 9        | Cl | 0 | -0.358 | 0.558  | -2.579 | Cl |
| HETATM | 10       | Cl | 0 | -0.377 | 1.561  | 2.145  | Cl |
| HETATM | 11       | C  | 0 | -2.434 | 2.163  | -0.520 | C  |
| HETATM | 12       | C  | 0 | 2.872  | -0.850 | 0.217  | C  |
| HETATM | 13       | C  | 0 | 3.536  | -0.207 | 1.280  | C  |
| HETATM | 14       | C  | 0 | 3.432  | -0.897 | -1.075 | C  |
| HETATM | 15       | C  | 0 | 4.769  | 0.401  | 1.022  | C  |
| HETATM | 16       | C  | 0 | 4.669  | -0.280 | -1.287 | C  |
| HETATM | 17       | C  | 0 | 5.347  | 0.376  | -0.253 | C  |
| HETATM | 18       | H  | 0 | 5.290  | 0.909  | 1.844  | H  |
| HETATM | 19       | H  | 0 | 5.112  | -0.312 | -2.291 | H  |
| HETATM | 20       | C  | 0 | -1.908 | -1.656 | 0.328  | C  |
| HETATM | 21       | C  | 0 | -2.770 | -1.249 | 1.371  | C  |
| HETATM | 22       | C  | 0 | -2.379 | -1.795 | -0.994 | C  |
| HETATM | 23       | C  | 0 | -4.074 | -0.870 | 1.041  | C  |
| HETATM | 24       | C  | 0 | -3.691 | -1.394 | -1.279 | C  |
| HETATM | 25       | C  | 0 | -4.537 | -0.900 | -0.281 | C  |



|        |    |   |   |        |        |        |   |
|--------|----|---|---|--------|--------|--------|---|
| HETATM | 26 | H | 0 | -4.742 | -0.525 | 1.840  | H |
| HETATM | 27 | H | 0 | -4.053 | -1.469 | -2.312 | H |
| HETATM | 28 | C | 0 | 2.913  | -0.146 | 2.639  | C |
| HETATM | 29 | H | 0 | 3.555  | 0.403  | 3.348  | H |
| HETATM | 30 | H | 0 | 1.928  | 0.360  | 2.614  | H |
| HETATM | 31 | H | 0 | 2.739  | -1.152 | 3.065  | H |
| HETATM | 32 | C | 0 | 2.693  | -1.554 | -2.198 | C |
| HETATM | 33 | H | 0 | 2.335  | -2.566 | -1.931 | H |
| HETATM | 34 | H | 0 | 1.793  | -0.968 | -2.477 | H |
| HETATM | 35 | H | 0 | 3.325  | -1.644 | -3.096 | H |
| HETATM | 36 | C | 0 | 6.654  | 1.064  | -0.511 | C |
| HETATM | 37 | H | 0 | 6.502  | 2.132  | -0.759 | H |
| HETATM | 38 | H | 0 | 7.315  | 1.038  | 0.372  | H |
| HETATM | 39 | H | 0 | 7.196  | 0.615  | -1.360 | H |
| HETATM | 40 | C | 0 | -2.305 | -1.245 | 2.792  | C |
| HETATM | 41 | H | 0 | -3.132 | -1.000 | 3.478  | H |
| HETATM | 42 | H | 0 | -1.900 | -2.229 | 3.092  | H |
| HETATM | 43 | H | 0 | -1.505 | -0.498 | 2.948  | H |
| HETATM | 44 | C | 0 | -1.540 | -2.424 | -2.063 | C |
| HETATM | 45 | H | 0 | -1.697 | -3.521 | -2.080 | H |
| HETATM | 46 | H | 0 | -1.805 | -2.036 | -3.059 | H |
| HETATM | 47 | H | 0 | -0.463 | -2.238 | -1.927 | H |
| HETATM | 48 | C | 0 | -5.907 | -0.391 | -0.611 | C |
| HETATM | 49 | H | 0 | -5.931 | 0.716  | -0.585 | H |
| HETATM | 50 | H | 0 | -6.235 | -0.700 | -1.617 | H |
| HETATM | 51 | H | 0 | -6.663 | -0.732 | 0.118  | H |
| HETATM | 52 | H | 0 | 1.945  | -2.979 | 1.941  | H |
| HETATM | 53 | H | 0 | -0.326 | -3.713 | 1.714  | H |
| HETATM | 54 | C | 0 | -1.492 | 3.081  | -0.838 | C |
| HETATM | 55 | H | 0 | -0.910 | 3.025  | -1.764 | H |
| HETATM | 56 | C | 0 | 1.390  | 1.599  | -0.300 | C |
| HETATM | 57 | H | 0 | 1.905  | 2.069  | 0.566  | H |
| HETATM | 58 | H | 0 | 1.918  | 1.661  | -1.276 | H |
| HETATM | 59 | H | 0 | -2.688 | 1.321  | -1.179 | H |
| HETATM | 60 | F | 0 | -3.217 | 2.311  | 0.536  | F |
| HETATM | 61 | F | 0 | -1.292 | 4.148  | -0.087 | F |

END

### at3g.pdb

| TITLE  | at3g.pdb |    |   |        |        |        |    |
|--------|----------|----|---|--------|--------|--------|----|
| HETATM | 1        | Ru | 0 | -0.302 | 0.913  | 0.061  | Ru |
| HETATM | 2        | C  | 0 | -0.492 | -3.301 | 0.074  | C  |
| HETATM | 3        | C  | 0 | 1.029  | -3.198 | -0.050 | C  |
| HETATM | 4        | H  | 0 | -0.955 | -3.873 | -0.751 | H  |
| HETATM | 5        | H  | 0 | 1.410  | -3.592 | -1.013 | H  |
| HETATM | 6        | C  | 0 | 0.133  | -1.032 | 0.028  | C  |
| HETATM | 7        | N  | 0 | 1.275  | -1.755 | 0.030  | N  |
| HETATM | 8        | N  | 0 | -0.909 | -1.903 | 0.029  | N  |
| HETATM | 9        | Cl | 0 | -0.822 | 1.096  | -2.306 | Cl |
| HETATM | 10       | Cl | 0 | -0.211 | 0.932  | 2.484  | Cl |
| HETATM | 11       | C  | 0 | -1.880 | 2.729  | 0.319  | C  |
| HETATM | 12       | C  | 0 | 2.593  | -1.222 | -0.028 | C  |
| HETATM | 13       | C  | 0 | 3.329  | -1.088 | 1.164  | C  |
| HETATM | 14       | C  | 0 | 3.124  | -0.819 | -1.268 | C  |
| HETATM | 15       | C  | 0 | 4.613  | -0.540 | 1.094  | C  |
| HETATM | 16       | C  | 0 | 4.411  | -0.272 | -1.293 | C  |
| HETATM | 17       | C  | 0 | 5.166  | -0.121 | -0.124 | C  |
| HETATM | 18       | H  | 0 | 5.192  | -0.424 | 2.019  | H  |
| HETATM | 19       | H  | 0 | 4.831  | 0.052  | -2.255 | H  |
| HETATM | 20       | C  | 0 | -2.264 | -1.452 | 0.010  | C  |
| HETATM | 21       | C  | 0 | -2.929 | -1.165 | 1.221  | C  |

|        |    |   |   |        |        |        |   |
|--------|----|---|---|--------|--------|--------|---|
| HETATM | 22 | C | 0 | -2.920 | -1.303 | -1.233 | C |
| HETATM | 23 | C | 0 | -4.210 | -0.600 | 1.156  | C |
| HETATM | 24 | C | 0 | -4.200 | -0.747 | -1.247 | C |
| HETATM | 25 | C | 0 | -4.847 | -0.361 | -0.065 | C |
| HETATM | 26 | H | 0 | -4.725 | -0.355 | 2.094  | H |
| HETATM | 27 | H | 0 | -4.704 | -0.605 | -2.212 | H |
| HETATM | 28 | C | 0 | 2.710  | -1.452 | 2.478  | C |
| HETATM | 29 | H | 0 | 3.431  | -1.344 | 3.305  | H |
| HETATM | 30 | H | 0 | 1.841  | -0.799 | 2.696  | H |
| HETATM | 31 | H | 0 | 2.333  | -2.491 | 2.496  | H |
| HETATM | 32 | C | 0 | 2.305  | -0.921 | -2.517 | C |
| HETATM | 33 | H | 0 | 1.822  | -1.910 | -2.623 | H |
| HETATM | 34 | H | 0 | 1.483  | -0.177 | -2.529 | H |
| HETATM | 35 | H | 0 | 2.921  | -0.750 | -3.415 | H |
| HETATM | 36 | C | 0 | 6.528  | 0.504  | -0.167 | C |
| HETATM | 37 | H | 0 | 6.476  | 1.591  | 0.030  | H |
| HETATM | 38 | H | 0 | 7.202  | 0.078  | 0.596  | H |
| HETATM | 39 | H | 0 | 7.007  | 0.383  | -1.153 | H |
| HETATM | 40 | C | 0 | -2.358 | -1.544 | 2.553  | C |
| HETATM | 41 | H | 0 | -2.520 | -0.754 | 3.303  | H |
| HETATM | 42 | H | 0 | -2.856 | -2.461 | 2.926  | H |
| HETATM | 43 | H | 0 | -1.274 | -1.732 | 2.521  | H |
| HETATM | 44 | C | 0 | -2.296 | -1.795 | -2.502 | C |
| HETATM | 45 | H | 0 | -2.549 | -2.861 | -2.672 | H |
| HETATM | 46 | H | 0 | -2.661 | -1.229 | -3.373 | H |
| HETATM | 47 | H | 0 | -1.198 | -1.703 | -2.493 | H |
| HETATM | 48 | C | 0 | -6.192 | 0.297  | -0.115 | C |
| HETATM | 49 | H | 0 | -6.098 | 1.378  | -0.334 | H |
| HETATM | 50 | H | 0 | -6.831 | -0.128 | -0.908 | H |
| HETATM | 51 | H | 0 | -6.731 | 0.211  | 0.843  | H |
| HETATM | 52 | H | 0 | 1.567  | -3.728 | 0.755  | H |
| HETATM | 53 | H | 0 | -0.816 | -3.768 | 1.024  | H |
| HETATM | 54 | C | 0 | -0.802 | 3.447  | -0.074 | C |
| HETATM | 55 | H | 0 | -0.486 | 3.590  | -1.114 | H |
| HETATM | 56 | C | 0 | 1.398  | 1.517  | -0.063 | C |
| HETATM | 57 | H | 0 | 2.228  | 1.296  | 0.642  | H |
| HETATM | 58 | H | 0 | -2.188 | 2.713  | 1.370  | H |
| HETATM | 59 | H | 0 | -2.545 | 2.324  | -0.452 | H |
| HETATM | 60 | F | 0 | 1.846  | 2.385  | -0.968 | F |
| HETATM | 61 | F | 0 | -0.067 | 4.132  | 0.795  | F |

END

### at3h.pdb

|        |          |    |   |        |        |        |    |
|--------|----------|----|---|--------|--------|--------|----|
| TITLE  | at3h.pdb |    |   |        |        |        |    |
| HETATM | 1        | Ru | 0 | -0.090 | 0.967  | 0.066  | Ru |
| HETATM | 2        | Cl | 0 | 0.719  | 0.980  | 2.348  | Cl |
| HETATM | 3        | Cl | 0 | -1.072 | 1.016  | -2.167 | Cl |
| HETATM | 4        | C  | 0 | -0.067 | -1.083 | 0.083  | C  |
| HETATM | 5        | N  | 0 | 1.013  | -1.880 | 0.035  | N  |
| HETATM | 6        | C  | 0 | 0.657  | -3.302 | 0.112  | C  |
| HETATM | 7        | C  | 0 | -0.868 | -3.272 | 0.249  | C  |
| HETATM | 8        | N  | 0 | -1.172 | -1.838 | 0.209  | N  |
| HETATM | 9        | C  | 0 | 2.355  | -1.405 | -0.070 | C  |
| HETATM | 10       | C  | 0 | 3.171  | -1.364 | 1.076  | C  |
| HETATM | 11       | C  | 0 | 4.457  | -0.830 | 0.953  | C  |
| HETATM | 12       | C  | 0 | 4.941  | -0.349 | -0.269 | C  |
| HETATM | 13       | C  | 0 | 4.118  | -0.434 | -1.397 | C  |
| HETATM | 14       | C  | 0 | 2.826  | -0.965 | -1.322 | C  |
| HETATM | 15       | C  | 0 | -2.495 | -1.296 | 0.161  | C  |
| HETATM | 16       | C  | 0 | -3.192 | -1.289 | -1.063 | C  |
| HETATM | 17       | C  | 0 | -4.449 | -0.682 | -1.107 | C  |

|        |    |   |   |        |        |        |   |
|--------|----|---|---|--------|--------|--------|---|
| HETATM | 18 | C | 0 | -5.022 | -0.094 | 0.027  | C |
| HETATM | 19 | C | 0 | -4.327 | -0.156 | 1.239  | C |
| HETATM | 20 | C | 0 | -3.068 | -0.762 | 1.332  | C |
| HETATM | 21 | C | 0 | 2.693  | -1.888 | 2.395  | C |
| HETATM | 22 | C | 0 | 6.307  | 0.264  | -0.357 | C |
| HETATM | 23 | C | 0 | 1.962  | -1.056 | -2.542 | C |
| HETATM | 24 | C | 0 | -2.621 | -1.926 | -2.293 | C |
| HETATM | 25 | C | 0 | -6.348 | 0.599  | -0.064 | C |
| HETATM | 26 | C | 0 | -2.368 | -0.856 | 2.654  | C |
| HETATM | 27 | H | 0 | 1.158  | -3.773 | 0.977  | H |
| HETATM | 28 | H | 0 | 1.002  | -3.829 | -0.797 | H |
| HETATM | 29 | H | 0 | -1.229 | -3.713 | 1.196  | H |
| HETATM | 30 | H | 0 | -1.387 | -3.793 | -0.577 | H |
| HETATM | 31 | H | 0 | 5.095  | -0.777 | 1.846  | H |
| HETATM | 32 | H | 0 | 4.489  | -0.080 | -2.368 | H |
| HETATM | 33 | H | 0 | -4.988 | -0.652 | -2.063 | H |
| HETATM | 34 | H | 0 | -4.778 | 0.267  | 2.145  | H |
| HETATM | 35 | H | 0 | 1.610  | -1.734 | 2.533  | H |
| HETATM | 36 | H | 0 | 3.198  | -1.376 | 3.231  | H |
| HETATM | 37 | H | 0 | 2.906  | -2.970 | 2.504  | H |
| HETATM | 38 | H | 0 | 7.044  | -0.281 | 0.258  | H |
| HETATM | 39 | H | 0 | 6.302  | 1.307  | 0.012  | H |
| HETATM | 40 | H | 0 | 6.681  | 0.291  | -1.394 | H |
| HETATM | 41 | H | 0 | 2.546  | -0.859 | -3.456 | H |
| HETATM | 42 | H | 0 | 1.125  | -0.329 | -2.525 | H |
| HETATM | 43 | H | 0 | 1.500  | -2.055 | -2.647 | H |
| HETATM | 44 | H | 0 | -1.519 | -1.909 | -2.300 | H |
| HETATM | 45 | H | 0 | -2.952 | -1.396 | -3.200 | H |
| HETATM | 46 | H | 0 | -2.949 | -2.980 | -2.390 | H |
| HETATM | 47 | H | 0 | -7.047 | 0.067  | -0.733 | H |
| HETATM | 48 | H | 0 | -6.237 | 1.620  | -0.475 | H |
| HETATM | 49 | H | 0 | -6.830 | 0.701  | 0.923  | H |
| HETATM | 50 | H | 0 | -3.055 | -0.608 | 3.480  | H |
| HETATM | 51 | H | 0 | -1.499 | -0.175 | 2.730  | H |
| HETATM | 52 | H | 0 | -1.974 | -1.872 | 2.840  | H |
| HETATM | 53 | C | 0 | -1.276 | 2.660  | 0.410  | C |
| HETATM | 54 | H | 0 | -1.549 | 2.739  | 1.472  | H |
| HETATM | 55 | H | 0 | -2.086 | 2.650  | -0.331 | H |
| HETATM | 56 | C | 0 | 1.399  | 1.923  | -0.472 | C |
| HETATM | 57 | C | 0 | -0.035 | 3.269  | 0.039  | C |
| HETATM | 58 | F | 0 | 1.785  | 2.154  | -1.724 | F |
| HETATM | 59 | H | 0 | 2.200  | 2.245  | 0.227  | H |
| HETATM | 60 | H | 0 | 0.059  | 3.751  | -0.946 | H |
| HETATM | 61 | F | 0 | 0.628  | 3.942  | 0.997  | F |

END

### at3PA.pdb

|        |           |    |   |        |        |        |    |
|--------|-----------|----|---|--------|--------|--------|----|
| TITLE  | at3PA.pdb |    |   |        |        |        |    |
| HETATM | 1         | Ru | 0 | 0.064  | 0.916  | 0.047  | Ru |
| HETATM | 2         | Cl | 0 | 0.928  | 0.983  | 2.294  | Cl |
| HETATM | 3         | Cl | 0 | -0.909 | 0.897  | -2.192 | Cl |
| HETATM | 4         | C  | 0 | -0.160 | -1.086 | 0.046  | C  |
| HETATM | 5         | N  | 0 | 0.878  | -1.935 | -0.007 | N  |
| HETATM | 6         | C  | 0 | 0.442  | -3.334 | -0.037 | C  |
| HETATM | 7         | C  | 0 | -1.078 | -3.221 | 0.124  | C  |
| HETATM | 8         | N  | 0 | -1.311 | -1.773 | 0.096  | N  |
| HETATM | 9         | C  | 0 | 2.238  | -1.495 | -0.068 | C  |
| HETATM | 10        | C  | 0 | 3.015  | -1.496 | 1.108  | C  |
| HETATM | 11        | C  | 0 | 4.308  | -0.974 | 1.047  | C  |
| HETATM | 12        | C  | 0 | 4.842  | -0.469 | -0.147 | C  |
| HETATM | 13        | C  | 0 | 4.065  | -0.528 | -1.307 | C  |

|        |    |   |   |        |        |        |   |
|--------|----|---|---|--------|--------|--------|---|
| HETATM | 14 | C | 0 | 2.762  | -1.043 | -1.294 | C |
| HETATM | 15 | C | 0 | -2.609 | -1.175 | 0.140  | C |
| HETATM | 16 | C | 0 | -3.401 | -1.158 | -1.024 | C |
| HETATM | 17 | C | 0 | -4.644 | -0.522 | -0.970 | C |
| HETATM | 18 | C | 0 | -5.113 | 0.080  | 0.204  | C |
| HETATM | 19 | C | 0 | -4.321 | 0.011  | 1.354  | C |
| HETATM | 20 | C | 0 | -3.071 | -0.618 | 1.348  | C |
| HETATM | 21 | C | 0 | 2.479  | -2.049 | 2.392  | C |
| HETATM | 22 | C | 0 | 6.214  | 0.132  | -0.168 | C |
| HETATM | 23 | C | 0 | 1.969  | -1.101 | -2.562 | C |
| HETATM | 24 | C | 0 | -2.947 | -1.818 | -2.289 | C |
| HETATM | 25 | C | 0 | -6.429 | 0.796  | 0.218  | C |
| HETATM | 26 | C | 0 | -2.262 | -0.704 | 2.606  | C |
| HETATM | 27 | H | 0 | 0.923  | -3.900 | 0.781  | H |
| HETATM | 28 | H | 0 | 0.743  | -3.806 | -0.991 | H |
| HETATM | 29 | H | 0 | -1.445 | -3.642 | 1.079  | H |
| HETATM | 30 | H | 0 | -1.638 | -3.712 | -0.692 | H |
| HETATM | 31 | H | 0 | 4.912  | -0.947 | 1.963  | H |
| HETATM | 32 | H | 0 | 4.479  | -0.165 | -2.256 | H |
| HETATM | 33 | H | 0 | -5.259 | -0.489 | -1.878 | H |
| HETATM | 34 | H | 0 | -4.689 | 0.448  | 2.292  | H |
| HETATM | 35 | H | 0 | 1.403  | -1.843 | 2.512  | H |
| HETATM | 36 | H | 0 | 2.990  | -1.603 | 3.260  | H |
| HETATM | 37 | H | 0 | 2.628  | -3.146 | 2.456  | H |
| HETATM | 38 | H | 0 | 6.928  | -0.446 | 0.444  | H |
| HETATM | 39 | H | 0 | 6.206  | 1.158  | 0.246  | H |
| HETATM | 40 | H | 0 | 6.619  | 0.202  | -1.192 | H |
| HETATM | 41 | H | 0 | 2.635  | -1.194 | -3.437 | H |
| HETATM | 42 | H | 0 | 1.354  | -0.193 | -2.711 | H |
| HETATM | 43 | H | 0 | 1.260  | -1.947 | -2.579 | H |
| HETATM | 44 | H | 0 | -1.851 | -1.793 | -2.399 | H |
| HETATM | 45 | H | 0 | -3.370 | -1.312 | -3.172 | H |
| HETATM | 46 | H | 0 | -3.277 | -2.876 | -2.336 | H |
| HETATM | 47 | H | 0 | -7.182 | 0.289  | -0.410 | H |
| HETATM | 48 | H | 0 | -6.330 | 1.824  | -0.180 | H |
| HETATM | 49 | H | 0 | -6.839 | 0.886  | 1.238  | H |
| HETATM | 50 | H | 0 | -2.890 | -0.512 | 3.492  | H |
| HETATM | 51 | H | 0 | -1.430 | 0.027  | 2.632  | H |
| HETATM | 52 | H | 0 | -1.792 | -1.696 | 2.734  | H |
| HETATM | 53 | C | 0 | -1.058 | 2.546  | 0.291  | C |
| HETATM | 54 | H | 0 | -1.330 | 2.764  | 1.337  | H |
| HETATM | 55 | H | 0 | -1.856 | 2.691  | -0.452 | H |
| HETATM | 56 | C | 0 | 1.455  | 2.145  | -0.517 | C |
| HETATM | 57 | C | 0 | 0.296  | 3.162  | -0.085 | C |
| HETATM | 58 | F | 0 | 1.835  | 2.294  | -1.805 | F |
| HETATM | 59 | H | 0 | 2.335  | 2.248  | 0.144  | H |
| HETATM | 60 | H | 0 | 0.168  | 3.773  | -0.997 | H |
| HETATM | 61 | F | 0 | 0.779  | 3.939  | 0.935  | F |

END

### at3i.pdb

|        |          |    |   |        |        |        |    |
|--------|----------|----|---|--------|--------|--------|----|
| TITLE  | at3i.pdb |    |   |        |        |        |    |
| HETATM | 1        | Ru | 0 | -0.188 | 0.908  | -0.009 | Ru |
| HETATM | 2        | Cl | 0 | -1.062 | 0.842  | -2.279 | Cl |
| HETATM | 3        | Cl | 0 | 0.667  | 1.087  | 2.268  | Cl |
| HETATM | 4        | C  | 0 | 0.216  | -1.076 | 0.067  | C  |
| HETATM | 5        | N  | 0 | -0.790 | -1.960 | 0.212  | N  |
| HETATM | 6        | C  | 0 | -0.312 | -3.311 | 0.499  | C  |
| HETATM | 7        | C  | 0 | 1.194  | -3.184 | 0.255  | C  |
| HETATM | 8        | N  | 0 | 1.388  | -1.735 | 0.125  | N  |
| HETATM | 9        | C  | 0 | -2.155 | -1.540 | 0.162  | C  |

|        |    |   |   |        |        |        |   |
|--------|----|---|---|--------|--------|--------|---|
| HETATM | 10 | C | 0 | -2.865 | -1.712 | -1.047 | C |
| HETATM | 11 | C | 0 | -4.159 | -1.205 | -1.136 | C |
| HETATM | 12 | C | 0 | -4.758 | -0.524 | -0.065 | C |
| HETATM | 13 | C | 0 | -4.047 | -0.396 | 1.127  | C |
| HETATM | 14 | C | 0 | -2.749 | -0.914 | 1.274  | C |
| HETATM | 15 | C | 0 | 2.669  | -1.131 | -0.043 | C |
| HETATM | 16 | C | 0 | 3.504  | -0.951 | 1.073  | C |
| HETATM | 17 | C | 0 | 4.736  | -0.312 | 0.883  | C |
| HETATM | 18 | C | 0 | 5.147  | 0.138  | -0.375 | C |
| HETATM | 19 | C | 0 | 4.306  | -0.083 | -1.473 | C |
| HETATM | 20 | C | 0 | 3.068  | -0.718 | -1.331 | C |
| HETATM | 21 | C | 0 | -2.234 | -2.406 | -2.213 | C |
| HETATM | 22 | C | 0 | -6.131 | 0.057  | -0.215 | C |
| HETATM | 23 | C | 0 | -2.086 | -0.852 | 2.617  | C |
| HETATM | 24 | C | 0 | 3.110  | -1.440 | 2.432  | C |
| HETATM | 25 | C | 0 | 6.449  | 0.860  | -0.546 | C |
| HETATM | 26 | C | 0 | 2.188  | -0.954 | -2.520 | C |
| HETATM | 27 | H | 0 | -0.798 | -4.051 | -0.160 | H |
| HETATM | 28 | H | 0 | -0.555 | -3.584 | 1.545  | H |
| HETATM | 29 | H | 0 | 1.523  | -3.693 | -0.672 | H |
| HETATM | 30 | H | 0 | 1.803  | -3.582 | 1.085  | H |
| HETATM | 31 | H | 0 | -4.707 | -1.314 | -2.081 | H |
| HETATM | 32 | H | 0 | -4.508 | 0.112  | 1.985  | H |
| HETATM | 33 | H | 0 | 5.388  | -0.154 | 1.753  | H |
| HETATM | 34 | H | 0 | 4.624  | 0.241  | -2.473 | H |
| HETATM | 35 | H | 0 | -1.192 | -2.075 | -2.363 | H |
| HETATM | 36 | H | 0 | -2.782 | -2.192 | -3.145 | H |
| HETATM | 37 | H | 0 | -2.225 | -3.507 | -2.085 | H |
| HETATM | 38 | H | 0 | -6.845 | -0.678 | -0.627 | H |
| HETATM | 39 | H | 0 | -6.130 | 0.914  | -0.915 | H |
| HETATM | 40 | H | 0 | -6.535 | 0.419  | 0.745  | H |
| HETATM | 41 | H | 0 | -2.658 | -1.451 | 3.351  | H |
| HETATM | 42 | H | 0 | -2.045 | 0.181  | 3.003  | H |
| HETATM | 43 | H | 0 | -1.047 | -1.215 | 2.608  | H |
| HETATM | 44 | H | 0 | 2.018  | -1.423 | 2.574  | H |
| HETATM | 45 | H | 0 | 3.548  | -0.807 | 3.222  | H |
| HETATM | 46 | H | 0 | 3.470  | -2.473 | 2.611  | H |
| HETATM | 47 | H | 0 | 7.158  | 0.634  | 0.268  | H |
| HETATM | 48 | H | 0 | 6.302  | 1.957  | -0.546 | H |
| HETATM | 49 | H | 0 | 6.938  | 0.611  | -1.504 | H |
| HETATM | 50 | H | 0 | 2.728  | -0.754 | -3.460 | H |
| HETATM | 51 | H | 0 | 1.284  | -0.312 | -2.515 | H |
| HETATM | 52 | H | 0 | 1.820  | -1.996 | -2.562 | H |
| HETATM | 53 | C | 0 | 1.307  | 1.858  | -0.517 | C |
| HETATM | 54 | H | 0 | 1.432  | 2.223  | -1.558 | H |
| HETATM | 55 | H | 0 | 2.115  | 2.103  | 0.203  | H |
| HETATM | 56 | C | 0 | -1.638 | 2.503  | 0.321  | C |
| HETATM | 57 | C | 0 | -0.497 | 3.265  | 0.030  | C |
| HETATM | 58 | F | 0 | -2.081 | 2.453  | 1.592  | F |
| HETATM | 59 | H | 0 | -2.435 | 2.375  | -0.425 | H |
| HETATM | 60 | H | 0 | 0.101  | 3.728  | 0.825  | H |
| HETATM | 61 | F | 0 | -0.429 | 3.882  | -1.151 | F |

END

### at3j.pdb

|        |          |    |   |        |        |        |    |
|--------|----------|----|---|--------|--------|--------|----|
| TITLE  | at3j.pdb |    |   |        |        |        |    |
| HETATM | 1        | Ru | 0 | -0.201 | 0.982  | 0.087  | Ru |
| HETATM | 2        | C  | 0 | -0.244 | -3.260 | 0.062  | C  |
| HETATM | 3        | C  | 0 | 1.270  | -3.097 | 0.178  | C  |
| HETATM | 4        | H  | 0 | -0.555 | -3.710 | -0.901 | H  |
| HETATM | 5        | H  | 0 | 1.828  | -3.605 | -0.629 | H  |

|        |    |    |   |        |        |        |    |
|--------|----|----|---|--------|--------|--------|----|
| HETATM | 6  | C  | 0 | 0.284  | -0.973 | 0.083  | C  |
| HETATM | 7  | N  | 0 | 1.456  | -1.644 | 0.084  | N  |
| HETATM | 8  | N  | 0 | -0.721 | -1.881 | 0.147  | N  |
| HETATM | 9  | Cl | 0 | -0.542 | 1.201  | -2.325 | Cl |
| HETATM | 10 | Cl | 0 | -0.070 | 0.944  | 2.518  | Cl |
| HETATM | 11 | C  | 0 | -1.908 | 2.637  | 0.011  | C  |
| HETATM | 12 | C  | 0 | 2.757  | -1.072 | -0.022 | C  |
| HETATM | 13 | C  | 0 | 3.529  | -0.873 | 1.138  | C  |
| HETATM | 14 | C  | 0 | 3.250  | -0.732 | -1.297 | C  |
| HETATM | 15 | C  | 0 | 4.802  | -0.309 | 0.999  | C  |
| HETATM | 16 | C  | 0 | 4.527  | -0.168 | -1.389 | C  |
| HETATM | 17 | C  | 0 | 5.313  | 0.056  | -0.253 | C  |
| HETATM | 18 | H  | 0 | 5.407  | -0.140 | 1.899  | H  |
| HETATM | 19 | H  | 0 | 4.917  | 0.102  | -2.379 | H  |
| HETATM | 20 | C  | 0 | -2.097 | -1.519 | -0.003 | C  |
| HETATM | 21 | C  | 0 | -2.907 | -1.382 | 1.145  | C  |
| HETATM | 22 | C  | 0 | -2.638 | -1.371 | -1.297 | C  |
| HETATM | 23 | C  | 0 | -4.234 | -0.981 | 0.976  | C  |
| HETATM | 24 | C  | 0 | -3.967 | -0.950 | -1.416 | C  |
| HETATM | 25 | C  | 0 | -4.770 | -0.728 | -0.293 | C  |
| HETATM | 26 | H  | 0 | -4.867 | -0.859 | 1.864  | H  |
| HETATM | 27 | H  | 0 | -4.387 | -0.805 | -2.420 | H  |
| HETATM | 28 | C  | 0 | 2.978  | -1.201 | 2.490  | C  |
| HETATM | 29 | H  | 0 | 3.672  | -0.892 | 3.288  | H  |
| HETATM | 30 | H  | 0 | 2.011  | -0.688 | 2.663  | H  |
| HETATM | 31 | H  | 0 | 2.795  | -2.284 | 2.621  | H  |
| HETATM | 32 | C  | 0 | 2.413  | -0.950 | -2.518 | C  |
| HETATM | 33 | H  | 0 | 2.000  | -1.975 | -2.561 | H  |
| HETATM | 34 | H  | 0 | 1.543  | -0.263 | -2.545 | H  |
| HETATM | 35 | H  | 0 | 2.996  | -0.784 | -3.438 | H  |
| HETATM | 36 | C  | 0 | 6.663  | 0.696  | -0.372 | C  |
| HETATM | 37 | H  | 0 | 6.583  | 1.800  | -0.388 | H  |
| HETATM | 38 | H  | 0 | 7.320  | 0.437  | 0.475  | H  |
| HETATM | 39 | H  | 0 | 7.176  | 0.406  | -1.305 | H  |
| HETATM | 40 | C  | 0 | -2.371 | -1.692 | 2.507  | C  |
| HETATM | 41 | H  | 0 | -3.152 | -1.574 | 3.275  | H  |
| HETATM | 42 | H  | 0 | -1.997 | -2.732 | 2.571  | H  |
| HETATM | 43 | H  | 0 | -1.529 | -1.028 | 2.772  | H  |
| HETATM | 44 | C  | 0 | -1.863 | -1.745 | -2.524 | C  |
| HETATM | 45 | H  | 0 | -2.068 | -2.799 | -2.798 | H  |
| HETATM | 46 | H  | 0 | -2.149 | -1.119 | -3.384 | H  |
| HETATM | 47 | H  | 0 | -0.774 | -1.630 | -2.400 | H  |
| HETATM | 48 | C  | 0 | -6.174 | -0.225 | -0.439 | C  |
| HETATM | 49 | H  | 0 | -6.217 | 0.873  | -0.311 | H  |
| HETATM | 50 | H  | 0 | -6.592 | -0.446 | -1.436 | H  |
| HETATM | 51 | H  | 0 | -6.849 | -0.655 | 0.321  | H  |
| HETATM | 52 | H  | 0 | 1.666  | -3.473 | 1.140  | H  |
| HETATM | 53 | H  | 0 | -0.679 | -3.875 | 0.870  | H  |
| HETATM | 54 | C  | 0 | -0.863 | 3.356  | 0.515  | C  |
| HETATM | 55 | C  | 0 | 1.472  | 1.671  | -0.080 | C  |
| HETATM | 56 | H  | 0 | 2.284  | 1.458  | 0.645  | H  |
| HETATM | 57 | H  | 0 | 1.717  | 2.389  | -0.892 | H  |
| HETATM | 58 | H  | 0 | -0.617 | 3.450  | 1.578  | H  |
| HETATM | 59 | H  | 0 | -2.244 | 2.676  | -1.030 | H  |
| HETATM | 60 | F  | 0 | -2.748 | 2.009  | 0.847  | F  |
| HETATM | 61 | F  | 0 | -0.193 | 4.172  | -0.300 | F  |
| END    |    |    |   |        |        |        |    |

### s3k.pdb

|        |         |    |   |       |        |       |    |
|--------|---------|----|---|-------|--------|-------|----|
| TITLE  | s3k.pdb |    |   |       |        |       |    |
| HETATM | 1       | Ru | 0 | 0.220 | -1.025 | 0.003 | Ru |

|        |    |    |   |        |        |        |    |
|--------|----|----|---|--------|--------|--------|----|
| HETATM | 2  | C  | 0 | 0.114  | 3.159  | 0.278  | C  |
| HETATM | 3  | C  | 0 | -1.396 | 2.933  | 0.348  | C  |
| HETATM | 4  | H  | 0 | 0.424  | 3.664  | -0.659 | H  |
| HETATM | 5  | H  | 0 | -1.955 | 3.473  | -0.437 | H  |
| HETATM | 6  | C  | 0 | -0.327 | 0.857  | 0.170  | C  |
| HETATM | 7  | N  | 0 | -1.527 | 1.484  | 0.162  | N  |
| HETATM | 8  | N  | 0 | 0.642  | 1.799  | 0.320  | N  |
| HETATM | 9  | Cl | 0 | 0.416  | -1.010 | -2.404 | Cl |
| HETATM | 10 | Cl | 0 | 0.236  | -1.476 | 2.402  | Cl |
| HETATM | 11 | C  | 0 | 2.349  | -2.605 | 0.114  | C  |
| HETATM | 12 | C  | 0 | -2.803 | 0.863  | 0.048  | C  |
| HETATM | 13 | C  | 0 | -3.490 | 0.455  | 1.209  | C  |
| HETATM | 14 | C  | 0 | -3.376 | 0.712  | -1.230 | C  |
| HETATM | 15 | C  | 0 | -4.761 | -0.111 | 1.066  | C  |
| HETATM | 16 | C  | 0 | -4.648 | 0.138  | -1.328 | C  |
| HETATM | 17 | C  | 0 | -5.352 | -0.280 | -0.193 | C  |
| HETATM | 18 | H  | 0 | -5.303 | -0.431 | 1.965  | H  |
| HETATM | 19 | H  | 0 | -5.099 | 0.016  | -2.321 | H  |
| HETATM | 20 | C  | 0 | 2.025  | 1.462  | 0.184  | C  |
| HETATM | 21 | C  | 0 | 2.781  | 1.181  | 1.343  | C  |
| HETATM | 22 | C  | 0 | 2.618  | 1.441  | -1.096 | C  |
| HETATM | 23 | C  | 0 | 4.107  | 0.764  | 1.184  | C  |
| HETATM | 24 | C  | 0 | 3.948  | 1.022  | -1.204 | C  |
| HETATM | 25 | C  | 0 | 4.694  | 0.651  | -0.082 | C  |
| HETATM | 26 | H  | 0 | 4.698  | 0.529  | 2.078  | H  |
| HETATM | 27 | H  | 0 | 4.406  | 0.972  | -2.201 | H  |
| HETATM | 28 | C  | 0 | -2.847 | 0.577  | 2.555  | C  |
| HETATM | 29 | H  | 0 | -3.559 | 0.340  | 3.362  | H  |
| HETATM | 30 | H  | 0 | -1.985 | -0.115 | 2.650  | H  |
| HETATM | 31 | H  | 0 | -2.448 | 1.590  | 2.744  | H  |
| HETATM | 32 | C  | 0 | -2.611 | 1.114  | -2.452 | C  |
| HETATM | 33 | H  | 0 | -2.231 | 2.151  | -2.389 | H  |
| HETATM | 34 | H  | 0 | -1.723 | 0.466  | -2.593 | H  |
| HETATM | 35 | H  | 0 | -3.234 | 1.039  | -3.359 | H  |
| HETATM | 36 | C  | 0 | -6.701 | -0.920 | -0.322 | C  |
| HETATM | 37 | H  | 0 | -6.618 | -2.023 | -0.361 | H  |
| HETATM | 38 | H  | 0 | -7.353 | -0.684 | 0.536  | H  |
| HETATM | 39 | H  | 0 | -7.220 | -0.607 | -1.243 | H  |
| HETATM | 40 | C  | 0 | 2.194  | 1.371  | 2.707  | C  |
| HETATM | 41 | H  | 0 | 2.947  | 1.184  | 3.490  | H  |
| HETATM | 42 | H  | 0 | 1.818  | 2.402  | 2.846  | H  |
| HETATM | 43 | H  | 0 | 1.346  | 0.685  | 2.887  | H  |
| HETATM | 44 | C  | 0 | 1.885  | 1.924  | -2.309 | C  |
| HETATM | 45 | H  | 0 | 2.071  | 3.005  | -2.469 | H  |
| HETATM | 46 | H  | 0 | 2.223  | 1.396  | -3.215 | H  |
| HETATM | 47 | H  | 0 | 0.797  | 1.769  | -2.240 | H  |
| HETATM | 48 | C  | 0 | 6.085  | 0.118  | -0.235 | C  |
| HETATM | 49 | H  | 0 | 6.065  | -0.970 | -0.439 | H  |
| HETATM | 50 | H  | 0 | 6.620  | 0.586  | -1.079 | H  |
| HETATM | 51 | H  | 0 | 6.689  | 0.262  | 0.678  | H  |
| HETATM | 52 | H  | 0 | -1.828 | 3.233  | 1.323  | H  |
| HETATM | 53 | H  | 0 | 0.501  | 3.759  | 1.120  | H  |
| HETATM | 54 | C  | 0 | 1.294  | -3.390 | -0.172 | C  |
| HETATM | 55 | H  | 0 | 1.119  | -3.760 | -1.188 | H  |
| HETATM | 56 | C  | 0 | -1.464 | -1.693 | -0.112 | C  |
| HETATM | 57 | H  | 0 | -2.036 | -2.020 | 0.785  | H  |
| HETATM | 58 | H  | 0 | -1.969 | -1.841 | -1.091 | H  |
| HETATM | 59 | H  | 0 | 2.602  | -2.232 | 1.116  | H  |
| HETATM | 60 | H  | 0 | 0.660  | -3.729 | 0.652  | H  |
| HETATM | 61 | F  | 0 | 3.233  | -2.244 | -0.807 | F  |

END

**s3l.pdb**

| TITLE  | s3l.pdb                           |    |   |        |        |        |    |
|--------|-----------------------------------|----|---|--------|--------|--------|----|
| REMARK | 1 File created by GaussView 5.0.8 |    |   |        |        |        |    |
| HETATM | 1                                 | Ru | 0 | 0.242  | -0.972 | 0.083  | Ru |
| HETATM | 2                                 | Cl | 0 | -0.283 | -1.097 | 2.475  | Cl |
| HETATM | 3                                 | Cl | 0 | 0.779  | -1.104 | -2.285 | Cl |
| HETATM | 4                                 | C  | 0 | -0.255 | 0.983  | 0.001  | C  |
| HETATM | 5                                 | N  | 0 | -1.443 | 1.611  | -0.085 | N  |
| HETATM | 6                                 | C  | 0 | -1.296 | 3.070  | -0.006 | C  |
| HETATM | 7                                 | C  | 0 | 0.220  | 3.273  | -0.088 | C  |
| HETATM | 8                                 | N  | 0 | 0.724  | 1.911  | 0.074  | N  |
| HETATM | 9                                 | H  | 0 | -1.721 | 3.443  | 0.946  | H  |
| HETATM | 10                                | H  | 0 | -1.847 | 3.557  | -0.830 | H  |
| HETATM | 11                                | H  | 0 | 0.612  | 3.938  | 0.701  | H  |
| HETATM | 12                                | H  | 0 | 0.542  | 3.687  | -1.064 | H  |
| HETATM | 13                                | C  | 0 | -2.709 | 0.957  | -0.119 | C  |
| HETATM | 14                                | C  | 0 | -3.444 | 0.783  | 1.069  | C  |
| HETATM | 15                                | C  | 0 | -4.672 | 0.115  | 0.998  | C  |
| HETATM | 16                                | C  | 0 | -5.175 | -0.372 | -0.213 | C  |
| HETATM | 17                                | C  | 0 | -4.431 | -0.166 | -1.381 | C  |
| HETATM | 18                                | C  | 0 | -3.199 | 0.496  | -1.356 | C  |
| HETATM | 19                                | C  | 0 | 2.093  | 1.496  | 0.067  | C  |
| HETATM | 20                                | C  | 0 | 2.780  | 1.351  | -1.156 | C  |
| HETATM | 21                                | C  | 0 | 4.052  | 0.775  | -1.136 | C  |
| HETATM | 22                                | C  | 0 | 4.654  | 0.366  | 0.060  | C  |
| HETATM | 23                                | C  | 0 | 3.990  | 0.613  | 1.267  | C  |
| HETATM | 24                                | C  | 0 | 2.714  | 1.188  | 1.297  | C  |
| HETATM | 25                                | C  | 0 | -2.938 | 1.307  | 2.378  | C  |
| HETATM | 26                                | C  | 0 | -6.473 | -1.121 | -0.256 | C  |
| HETATM | 27                                | C  | 0 | -2.411 | 0.706  | -2.611 | C  |
| HETATM | 28                                | C  | 0 | 2.183  | 1.833  | -2.442 | C  |
| HETATM | 29                                | C  | 0 | 5.971  | -0.346 | 0.043  | C  |
| HETATM | 30                                | C  | 0 | 2.045  | 1.502  | 2.599  | C  |
| HETATM | 31                                | H  | 0 | -5.246 | -0.034 | 1.922  | H  |
| HETATM | 32                                | H  | 0 | -4.820 | -0.526 | -2.343 | H  |
| HETATM | 33                                | H  | 0 | 4.575  | 0.618  | -2.087 | H  |
| HETATM | 34                                | H  | 0 | 4.478  | 0.357  | 2.217  | H  |
| HETATM | 35                                | H  | 0 | -3.162 | 2.386  | 2.500  | H  |
| HETATM | 36                                | H  | 0 | -1.849 | 1.168  | 2.483  | H  |
| HETATM | 37                                | H  | 0 | -3.415 | 0.786  | 3.224  | H  |
| HETATM | 38                                | H  | 0 | -7.172 | -0.782 | 0.528  | H  |
| HETATM | 39                                | H  | 0 | -6.318 | -2.205 | -0.093 | H  |
| HETATM | 40                                | H  | 0 | -6.978 | -1.017 | -1.231 | H  |
| HETATM | 41                                | H  | 0 | -3.004 | 0.443  | -3.503 | H  |
| HETATM | 42                                | H  | 0 | -1.488 | 0.091  | -2.627 | H  |
| HETATM | 43                                | H  | 0 | -2.081 | 1.756  | -2.722 | H  |
| HETATM | 44                                | H  | 0 | 1.090  | 1.698  | -2.471 | H  |
| HETATM | 45                                | H  | 0 | 2.596  | 1.282  | -3.302 | H  |
| HETATM | 46                                | H  | 0 | 2.403  | 2.908  | -2.599 | H  |
| HETATM | 47                                | H  | 0 | 6.634  | 0.023  | -0.759 | H  |
| HETATM | 48                                | H  | 0 | 5.825  | -1.427 | -0.142 | H  |
| HETATM | 49                                | H  | 0 | 6.507  | -0.254 | 1.003  | H  |
| HETATM | 50                                | H  | 0 | 2.755  | 1.411  | 3.437  | H  |
| HETATM | 51                                | H  | 0 | 1.198  | 0.819  | 2.804  | H  |
| HETATM | 52                                | H  | 0 | 1.640  | 2.531  | 2.611  | H  |
| HETATM | 53                                | C  | 0 | -1.232 | -2.015 | -0.265 | C  |
| HETATM | 54                                | H  | 0 | -1.428 | -2.411 | -1.283 | H  |
| HETATM | 55                                | H  | 0 | -1.955 | -2.293 | 0.530  | H  |
| HETATM | 56                                | C  | 0 | 1.805  | -2.499 | 0.466  | C  |
| HETATM | 57                                | C  | 0 | 0.670  | -3.289 | 0.322  | C  |
| HETATM | 58                                | F  | 0 | 2.790  | -2.541 | -0.438 | F  |



|        |    |   |   |       |        |        |   |
|--------|----|---|---|-------|--------|--------|---|
| HETATM | 59 | H | 0 | 2.151 | -2.135 | 1.444  | H |
| HETATM | 60 | H | 0 | 0.565 | -3.898 | -0.584 | H |
| HETATM | 61 | H | 0 | 0.113 | -3.568 | 1.222  | H |

END

### s3PB.pdb

| TITLE  | s3PB.pdb |    |   |        |        |        |    |
|--------|----------|----|---|--------|--------|--------|----|
| HETATM | 1        | Ru | 0 | 0.012  | -1.031 | -0.083 | Ru |
| HETATM | 2        | C  | 0 | -0.967 | 3.145  | -0.150 | C  |
| HETATM | 3        | C  | 0 | 0.535  | 3.219  | 0.133  | C  |
| HETATM | 4        | H  | 0 | -1.577 | 3.708  | 0.578  | H  |
| HETATM | 5        | H  | 0 | 0.769  | 3.667  | 1.119  | H  |
| HETATM | 6        | C  | 0 | -0.119 | 0.986  | 0.035  | C  |
| HETATM | 7        | N  | 0 | 0.939  | 1.810  | 0.111  | N  |
| HETATM | 8        | N  | 0 | -1.248 | 1.708  | -0.054 | N  |
| HETATM | 9        | Cl | 0 | -0.861 | -1.471 | 2.149  | Cl |
| HETATM | 10       | Cl | 0 | 0.775  | -0.753 | -2.370 | Cl |
| HETATM | 11       | C  | 0 | -1.136 | -2.514 | -0.717 | C  |
| HETATM | 12       | H  | 0 | -1.311 | -2.524 | -1.804 | H  |
| HETATM | 13       | C  | 0 | 2.284  | 1.340  | 0.220  | C  |
| HETATM | 14       | C  | 0 | 3.128  | 1.380  | -0.907 | C  |
| HETATM | 15       | C  | 0 | 2.731  | 0.819  | 1.450  | C  |
| HETATM | 16       | C  | 0 | 4.401  | 0.815  | -0.800 | C  |
| HETATM | 17       | C  | 0 | 4.017  | 0.271  | 1.512  | C  |
| HETATM | 18       | C  | 0 | 4.854  | 0.239  | 0.392  | C  |
| HETATM | 19       | H  | 0 | 5.054  | 0.814  | -1.683 | H  |
| HETATM | 20       | H  | 0 | 4.372  | -0.141 | 2.466  | H  |
| HETATM | 21       | C  | 0 | -2.560 | 1.136  | -0.067 | C  |
| HETATM | 22       | C  | 0 | -3.129 | 0.709  | -1.281 | C  |
| HETATM | 23       | C  | 0 | -3.258 | 1.018  | 1.151  | C  |
| HETATM | 24       | C  | 0 | -4.391 | 0.104  | -1.245 | C  |
| HETATM | 25       | C  | 0 | -4.515 | 0.409  | 1.141  | C  |
| HETATM | 26       | C  | 0 | -5.088 | -0.068 | -0.044 | C  |
| HETATM | 27       | H  | 0 | -4.841 | -0.235 | -2.187 | H  |
| HETATM | 28       | H  | 0 | -5.058 | 0.301  | 2.088  | H  |
| HETATM | 29       | C  | 0 | 2.695  | 2.025  | -2.188 | C  |
| HETATM | 30       | H  | 0 | 3.183  | 1.550  | -3.054 | H  |
| HETATM | 31       | H  | 0 | 1.608  | 1.942  | -2.348 | H  |
| HETATM | 32       | H  | 0 | 2.968  | 3.099  | -2.209 | H  |
| HETATM | 33       | C  | 0 | 1.860  | 0.841  | 2.670  | C  |
| HETATM | 34       | H  | 0 | 1.265  | 1.770  | 2.745  | H  |
| HETATM | 35       | H  | 0 | 1.128  | 0.009  | 2.679  | H  |
| HETATM | 36       | H  | 0 | 2.465  | 0.754  | 3.587  | H  |
| HETATM | 37       | C  | 0 | 6.197  | -0.420 | 0.456  | C  |
| HETATM | 38       | H  | 0 | 6.144  | -1.461 | 0.083  | H  |
| HETATM | 39       | H  | 0 | 6.945  | 0.099  | -0.168 | H  |
| HETATM | 40       | H  | 0 | 6.586  | -0.470 | 1.487  | H  |
| HETATM | 41       | C  | 0 | -2.410 | 0.893  | -2.582 | C  |
| HETATM | 42       | H  | 0 | -3.071 | 0.666  | -3.435 | H  |
| HETATM | 43       | H  | 0 | -2.042 | 1.927  | -2.711 | H  |
| HETATM | 44       | H  | 0 | -1.517 | 0.243  | -2.666 | H  |
| HETATM | 45       | C  | 0 | -2.652 | 1.516  | 2.427  | C  |
| HETATM | 46       | H  | 0 | -2.391 | 2.590  | 2.377  | H  |
| HETATM | 47       | H  | 0 | -3.345 | 1.384  | 3.274  | H  |
| HETATM | 48       | H  | 0 | -1.729 | 0.958  | 2.665  | H  |
| HETATM | 49       | C  | 0 | -6.417 | -0.760 | -0.022 | C  |
| HETATM | 50       | H  | 0 | -6.302 | -1.836 | 0.210  | H  |
| HETATM | 51       | H  | 0 | -7.087 | -0.343 | 0.749  | H  |
| HETATM | 52       | H  | 0 | -6.933 | -0.697 | -0.995 | H  |
| HETATM | 53       | H  | 0 | 1.093  | 3.788  | -0.631 | H  |
| HETATM | 54       | H  | 0 | -1.232 | 3.515  | -1.159 | H  |

|        |    |   |   |        |        |        |   |
|--------|----|---|---|--------|--------|--------|---|
| HETATM | 55 | C | 0 | 0.154  | -3.246 | -0.277 | C |
| HETATM | 56 | H | 0 | -0.108 | -3.924 | 0.552  | H |
| HETATM | 57 | H | 0 | 0.590  | -3.757 | -1.152 | H |
| HETATM | 58 | C | 0 | 1.366  | -2.371 | 0.274  | C |
| HETATM | 59 | H | 0 | 1.603  | -2.565 | 1.335  | H |
| HETATM | 60 | H | 0 | -2.016 | -2.735 | -0.093 | H |
| HETATM | 61 | F | 0 | 2.488  | -2.496 | -0.462 | F |

END

### s3m.pdb

| TITLE  | s3m.pdb |    |   |        |        |        |    |
|--------|---------|----|---|--------|--------|--------|----|
| HETATM | 1       | Ru | 0 | 0.219  | -1.089 | -0.013 | Ru |
| HETATM | 2       | Cl | 0 | 0.931  | -0.973 | -2.345 | Cl |
| HETATM | 3       | Cl | 0 | -0.281 | -1.382 | 2.350  | Cl |
| HETATM | 4       | C  | 0 | -0.007 | 0.926  | 0.232  | C  |
| HETATM | 5       | N  | 0 | 1.061  | 1.721  | 0.441  | N  |
| HETATM | 6       | C  | 0 | 0.692  | 3.128  | 0.615  | C  |
| HETATM | 7       | C  | 0 | -0.832 | 3.097  | 0.481  | C  |
| HETATM | 8       | N  | 0 | -1.126 | 1.671  | 0.287  | N  |
| HETATM | 9       | C  | 0 | 2.399  | 1.246  | 0.254  | C  |
| HETATM | 10      | C  | 0 | 2.985  | 1.335  | -1.024 | C  |
| HETATM | 11      | C  | 0 | 4.254  | 0.782  | -1.214 | C  |
| HETATM | 12      | C  | 0 | 4.948  | 0.160  | -0.170 | C  |
| HETATM | 13      | C  | 0 | 4.368  | 0.141  | 1.103  | C  |
| HETATM | 14      | C  | 0 | 3.103  | 0.690  | 1.344  | C  |
| HETATM | 15      | C  | 0 | -2.447 | 1.185  | 0.045  | C  |
| HETATM | 16      | C  | 0 | -3.312 | 0.939  | 1.127  | C  |
| HETATM | 17      | C  | 0 | -4.598 | 0.461  | 0.854  | C  |
| HETATM | 18      | C  | 0 | -5.032 | 0.223  | -0.456 | C  |
| HETATM | 19      | C  | 0 | -4.158 | 0.499  | -1.512 | C  |
| HETATM | 20      | C  | 0 | -2.866 | 0.989  | -1.285 | C  |
| HETATM | 21      | C  | 0 | 2.297  | 2.038  | -2.154 | C  |
| HETATM | 22      | C  | 0 | 6.279  | -0.482 | -0.415 | C  |
| HETATM | 23      | C  | 0 | 2.533  | 0.714  | 2.728  | C  |
| HETATM | 24      | C  | 0 | -2.862 | 1.164  | 2.537  | C  |
| HETATM | 25      | C  | 0 | -6.400 | -0.331 | -0.716 | C  |
| HETATM | 26      | C  | 0 | -1.951 | 1.294  | -2.430 | C  |
| HETATM | 27      | H  | 0 | 1.181  | 3.749  | -0.158 | H  |
| HETATM | 28      | H  | 0 | 1.032  | 3.498  | 1.600  | H  |
| HETATM | 29      | H  | 0 | -1.204 | 3.681  | -0.383 | H  |
| HETATM | 30      | H  | 0 | -1.351 | 3.477  | 1.379  | H  |
| HETATM | 31      | H  | 0 | 4.706  | 0.826  | -2.214 | H  |
| HETATM | 32      | H  | 0 | 4.919  | -0.302 | 1.943  | H  |
| HETATM | 33      | H  | 0 | -5.276 | 0.260  | 1.693  | H  |
| HETATM | 34      | H  | 0 | -4.490 | 0.342  | -2.547 | H  |
| HETATM | 35      | H  | 0 | 2.573  | 3.112  | -2.180 | H  |
| HETATM | 36      | H  | 0 | 1.199  | 1.975  | -2.086 | H  |
| HETATM | 37      | H  | 0 | 2.583  | 1.603  | -3.125 | H  |
| HETATM | 38      | H  | 0 | 6.871  | 0.066  | -1.168 | H  |
| HETATM | 39      | H  | 0 | 6.160  | -1.513 | -0.799 | H  |
| HETATM | 40      | H  | 0 | 6.881  | -0.553 | 0.507  | H  |
| HETATM | 41      | H  | 0 | 2.219  | 1.732  | 3.023  | H  |
| HETATM | 42      | H  | 0 | 3.277  | 0.369  | 3.465  | H  |
| HETATM | 43      | H  | 0 | 1.639  | 0.068  | 2.826  | H  |
| HETATM | 44      | H  | 0 | -2.608 | 2.223  | 2.732  | H  |
| HETATM | 45      | H  | 0 | -1.964 | 0.562  | 2.766  | H  |
| HETATM | 46      | H  | 0 | -3.650 | 0.883  | 3.255  | H  |
| HETATM | 47      | H  | 0 | -7.151 | 0.079  | -0.019 | H  |
| HETATM | 48      | H  | 0 | -6.740 | -0.126 | -1.745 | H  |
| HETATM | 49      | H  | 0 | -6.419 | -1.430 | -0.585 | H  |
| HETATM | 50      | H  | 0 | -1.520 | 2.311  | -2.357 | H  |

|        |    |   |   |        |        |        |   |
|--------|----|---|---|--------|--------|--------|---|
| HETATM | 51 | H | 0 | -2.483 | 1.228  | -3.393 | H |
| HETATM | 52 | H | 0 | -1.092 | 0.596  | -2.477 | H |
| HETATM | 53 | C | 0 | -1.302 | -1.982 | -0.553 | C |
| HETATM | 54 | F | 0 | -2.314 | -2.390 | 0.199  | F |
| HETATM | 55 | H | 0 | -1.552 | -2.153 | -1.622 | H |
| HETATM | 56 | C | 0 | 1.482  | -2.795 | 0.146  | C |
| HETATM | 57 | C | 0 | 0.254  | -3.367 | -0.283 | C |
| HETATM | 58 | H | 0 | 2.293  | -2.676 | -0.586 | H |
| HETATM | 59 | H | 0 | 1.760  | -2.881 | 1.205  | H |
| HETATM | 60 | H | 0 | 0.189  | -3.705 | -1.326 | H |
| HETATM | 61 | H | 0 | -0.351 | -3.912 | 0.454  | H |

END

### s3n.pdb

| TITLE  | s3n.pdb |    |   |        |        |        |    |
|--------|---------|----|---|--------|--------|--------|----|
| HETATM | 1       | Ru | 0 | -0.325 | 1.016  | 0.272  | Ru |
| HETATM | 2       | C  | 0 | -0.465 | -3.175 | -0.206 | C  |
| HETATM | 3       | C  | 0 | 1.057  | -3.058 | -0.292 | C  |
| HETATM | 4       | H  | 0 | -0.913 | -3.653 | -1.098 | H  |
| HETATM | 5       | H  | 0 | 1.459  | -3.366 | -1.277 | H  |
| HETATM | 6       | C  | 0 | 0.153  | -0.911 | -0.016 | C  |
| HETATM | 7       | N  | 0 | 1.297  | -1.627 | -0.080 | N  |
| HETATM | 8       | N  | 0 | -0.885 | -1.781 | -0.105 | N  |
| HETATM | 9       | Cl | 0 | -0.790 | 1.541  | -2.049 | Cl |
| HETATM | 10      | Cl | 0 | -0.277 | 0.641  | 2.673  | Cl |
| HETATM | 11      | C  | 0 | -2.011 | 2.645  | 0.703  | C  |
| HETATM | 12      | C  | 0 | 2.611  | -1.082 | -0.141 | C  |
| HETATM | 13      | C  | 0 | 3.399  | -1.047 | 1.024  | C  |
| HETATM | 14      | C  | 0 | 3.088  | -0.570 | -1.363 | C  |
| HETATM | 15      | C  | 0 | 4.677  | -0.481 | 0.947  | C  |
| HETATM | 16      | C  | 0 | 4.369  | -0.010 | -1.396 | C  |
| HETATM | 17      | C  | 0 | 5.173  | 0.048  | -0.252 | C  |
| HETATM | 18      | H  | 0 | 5.296  | -0.443 | 1.853  | H  |
| HETATM | 19      | H  | 0 | 4.746  | 0.395  | -2.344 | H  |
| HETATM | 20      | C  | 0 | -2.239 | -1.329 | -0.156 | C  |
| HETATM | 21      | C  | 0 | -2.988 | -1.195 | 1.032  | C  |
| HETATM | 22      | C  | 0 | -2.810 | -1.023 | -1.412 | C  |
| HETATM | 23      | C  | 0 | -4.264 | -0.623 | 0.951  | C  |
| HETATM | 24      | C  | 0 | -4.088 | -0.463 | -1.444 | C  |
| HETATM | 25      | C  | 0 | -4.816 | -0.226 | -0.271 | C  |
| HETATM | 26      | H  | 0 | -4.844 | -0.495 | 1.875  | H  |
| HETATM | 27      | H  | 0 | -4.524 | -0.195 | -2.415 | H  |
| HETATM | 28      | C  | 0 | 2.847  | -1.535 | 2.328  | C  |
| HETATM | 29      | H  | 0 | 3.592  | -1.448 | 3.135  | H  |
| HETATM | 30      | H  | 0 | 1.953  | -0.951 | 2.625  | H  |
| HETATM | 31      | H  | 0 | 2.528  | -2.593 | 2.284  | H  |
| HETATM | 32      | C  | 0 | 2.223  | -0.584 | -2.586 | C  |
| HETATM | 33      | H  | 0 | 1.745  | -1.567 | -2.749 | H  |
| HETATM | 34      | H  | 0 | 1.397  | 0.152  | -2.512 | H  |
| HETATM | 35      | H  | 0 | 2.804  | -0.339 | -3.490 | H  |
| HETATM | 36      | C  | 0 | 6.527  | 0.689  | -0.301 | C  |
| HETATM | 37      | H  | 0 | 6.460  | 1.780  | -0.126 | H  |
| HETATM | 38      | H  | 0 | 7.205  | 0.286  | 0.470  | H  |
| HETATM | 39      | H  | 0 | 7.011  | 0.558  | -1.284 | H  |
| HETATM | 40      | C  | 0 | -2.503 | -1.739 | 2.341  | C  |
| HETATM | 41      | H  | 0 | -2.778 | -1.079 | 3.180  | H  |
| HETATM | 42      | H  | 0 | -2.967 | -2.727 | 2.533  | H  |
| HETATM | 43      | H  | 0 | -1.411 | -1.857 | 2.379  | H  |
| HETATM | 44      | C  | 0 | -2.101 | -1.353 | -2.690 | C  |
| HETATM | 45      | H  | 0 | -2.338 | -2.389 | -3.007 | H  |
| HETATM | 46      | H  | 0 | -2.412 | -0.680 | -3.505 | H  |

|        |    |   |   |        |        |        |   |
|--------|----|---|---|--------|--------|--------|---|
| HETATM | 47 | H | 0 | -1.007 | -1.268 | -2.604 | H |
| HETATM | 48 | C | 0 | -6.152 | 0.449  | -0.327 | C |
| HETATM | 49 | H | 0 | -6.039 | 1.550  | -0.342 | H |
| HETATM | 50 | H | 0 | -6.714 | 0.180  | -1.238 | H |
| HETATM | 51 | H | 0 | -6.778 | 0.204  | 0.548  | H |
| HETATM | 52 | H | 0 | 1.581  | -3.656 | 0.474  | H |
| HETATM | 53 | H | 0 | -0.804 | -3.745 | 0.681  | H |
| HETATM | 54 | C | 0 | -0.878 | 3.397  | 0.700  | C |
| HETATM | 55 | H | 0 | -0.537 | 3.900  | -0.212 | H |
| HETATM | 56 | C | 0 | 1.362  | 1.670  | 0.239  | C |
| HETATM | 57 | H | 0 | 2.227  | 1.241  | 0.787  | H |
| HETATM | 58 | H | 0 | -2.413 | 2.235  | 1.640  | H |
| HETATM | 59 | H | 0 | -0.331 | 3.605  | 1.629  | H |
| HETATM | 60 | H | 0 | -2.623 | 2.541  | -0.202 | H |
| HETATM | 61 | F | 0 | 1.775  | 2.768  | -0.384 | F |

END

### a3k.pdb

| TITLE  | a3k.pdb |    |   |        |        |        |    |
|--------|---------|----|---|--------|--------|--------|----|
| HETATM | 1       | Ru | 0 | -0.271 | 0.974  | 0.170  | Ru |
| HETATM | 2       | C  | 0 | -0.372 | -3.236 | -0.070 | C  |
| HETATM | 3       | C  | 0 | 1.147  | -3.094 | 0.027  | C  |
| HETATM | 4       | H  | 0 | -0.703 | -3.623 | -1.054 | H  |
| HETATM | 5       | H  | 0 | 1.684  | -3.569 | -0.813 | H  |
| HETATM | 6       | C  | 0 | 0.185  | -0.959 | 0.068  | C  |
| HETATM | 7       | N  | 0 | 1.351  | -1.642 | 0.003  | N  |
| HETATM | 8       | N  | 0 | -0.831 | -1.861 | 0.112  | N  |
| HETATM | 9       | Cl | 0 | -0.701 | 1.339  | -2.187 | Cl |
| HETATM | 10      | Cl | 0 | -0.080 | 0.922  | 2.606  | Cl |
| HETATM | 11      | C  | 0 | -1.890 | 2.715  | 0.425  | C  |
| HETATM | 12      | C  | 0 | 2.653  | -1.073 | -0.091 | C  |
| HETATM | 13      | C  | 0 | 3.442  | -0.934 | 1.067  | C  |
| HETATM | 14      | C  | 0 | 3.131  | -0.668 | -1.353 | C  |
| HETATM | 15      | C  | 0 | 4.717  | -0.374 | 0.940  | C  |
| HETATM | 16      | C  | 0 | 4.411  | -0.108 | -1.434 | C  |
| HETATM | 17      | C  | 0 | 5.214  | 0.051  | -0.299 | C  |
| HETATM | 18      | H  | 0 | 5.335  | -0.256 | 1.839  | H  |
| HETATM | 19      | H  | 0 | 4.788  | 0.212  | -2.414 | H  |
| HETATM | 20      | C  | 0 | -2.193 | -1.444 | -0.013 | C  |
| HETATM | 21      | C  | 0 | -2.970 | -1.264 | 1.153  | C  |
| HETATM | 22      | C  | 0 | -2.745 | -1.237 | -1.294 | C  |
| HETATM | 23      | C  | 0 | -4.269 | -0.763 | 1.012  | C  |
| HETATM | 24      | C  | 0 | -4.049 | -0.738 | -1.385 | C  |
| HETATM | 25      | C  | 0 | -4.813 | -0.471 | -0.244 | C  |
| HETATM | 26      | H  | 0 | -4.877 | -0.611 | 1.914  | H  |
| HETATM | 27      | H  | 0 | -4.475 | -0.553 | -2.379 | H  |
| HETATM | 28      | C  | 0 | 2.901  | -1.313 | 2.410  | C  |
| HETATM | 29      | H  | 0 | 3.636  | -1.111 | 3.207  | H  |
| HETATM | 30      | H  | 0 | 1.982  | -0.740 | 2.644  | H  |
| HETATM | 31      | H  | 0 | 2.636  | -2.384 | 2.476  | H  |
| HETATM | 32      | C  | 0 | 2.274  | -0.812 | -2.572 | C  |
| HETATM | 33      | H  | 0 | 1.840  | -1.826 | -2.659 | H  |
| HETATM | 34      | H  | 0 | 1.417  | -0.108 | -2.554 | H  |
| HETATM | 35      | H  | 0 | 2.849  | -0.612 | -3.491 | H  |
| HETATM | 36      | C  | 0 | 6.567  | 0.686  | -0.401 | C  |
| HETATM | 37      | H  | 0 | 6.512  | 1.777  | -0.223 | H  |
| HETATM | 38      | H  | 0 | 7.272  | 0.281  | 0.345  | H  |
| HETATM | 39      | H  | 0 | 7.013  | 0.552  | -1.401 | H  |
| HETATM | 40      | C  | 0 | -2.441 | -1.649 | 2.499  | C  |
| HETATM | 41      | H  | 0 | -3.206 | -1.504 | 3.279  | H  |
| HETATM | 42      | H  | 0 | -2.138 | -2.712 | 2.524  | H  |

|        |    |   |   |        |        |        |   |
|--------|----|---|---|--------|--------|--------|---|
| HETATM | 43 | H | 0 | -1.555 | -1.051 | 2.780  | H |
| HETATM | 44 | C | 0 | -2.000 | -1.609 | -2.539 | C |
| HETATM | 45 | H | 0 | -2.227 | -2.655 | -2.828 | H |
| HETATM | 46 | H | 0 | -2.288 | -0.964 | -3.384 | H |
| HETATM | 47 | H | 0 | -0.908 | -1.516 | -2.429 | H |
| HETATM | 48 | C | 0 | -6.187 | 0.116  | -0.366 | C |
| HETATM | 49 | H | 0 | -6.146 | 1.222  | -0.405 | H |
| HETATM | 50 | H | 0 | -6.697 | -0.212 | -1.287 | H |
| HETATM | 51 | H | 0 | -6.827 | -0.147 | 0.493  | H |
| HETATM | 52 | H | 0 | 1.554  | -3.523 | 0.963  | H |
| HETATM | 53 | H | 0 | -0.795 | -3.898 | 0.706  | H |
| HETATM | 54 | C | 0 | -0.795 | 3.485  | 0.640  | C |
| HETATM | 55 | C | 0 | 1.414  | 1.636  | 0.007  | C |
| HETATM | 56 | H | 0 | 2.194  | 1.505  | 0.787  | H |
| HETATM | 57 | H | 0 | 1.700  | 2.257  | -0.871 | H |
| HETATM | 58 | H | 0 | -2.338 | 2.195  | 1.281  | H |
| HETATM | 59 | H | 0 | -0.253 | 3.559  | 1.591  | H |
| HETATM | 60 | H | 0 | -2.437 | 2.787  | -0.521 | H |
| HETATM | 61 | F | 0 | -0.335 | 4.308  | -0.291 | F |

END

### a3l.pdb

| TITLE  | a3l.pdb |    |   |        |        |        |    |
|--------|---------|----|---|--------|--------|--------|----|
| HETATM | 1       | Ru | 0 | -0.239 | 0.952  | -0.163 | Ru |
| HETATM | 2       | Cl | 0 | -0.674 | 0.713  | -2.563 | Cl |
| HETATM | 3       | Cl | 0 | 0.049  | 1.406  | 2.194  | Cl |
| HETATM | 4       | C  | 0 | 0.131  | -1.030 | 0.029  | C  |
| HETATM | 5       | N  | 0 | -0.900 | -1.897 | 0.087  | N  |
| HETATM | 6       | C  | 0 | -0.463 | -3.276 | 0.300  | C  |
| HETATM | 7       | C  | 0 | 1.052  | -3.170 | 0.107  | C  |
| HETATM | 8       | N  | 0 | 1.285  | -1.720 | 0.092  | N  |
| HETATM | 9       | C  | 0 | -2.241 | -1.410 | 0.169  | C  |
| HETATM | 10      | C  | 0 | -3.039 | -1.382 | -0.995 | C  |
| HETATM | 11      | C  | 0 | -4.296 | -0.776 | -0.921 | C  |
| HETATM | 12      | C  | 0 | -4.778 | -0.223 | 0.273  | C  |
| HETATM | 13      | C  | 0 | -3.995 | -0.331 | 1.427  | C  |
| HETATM | 14      | C  | 0 | -2.732 | -0.934 | 1.403  | C  |
| HETATM | 15      | C  | 0 | 2.589  | -1.139 | 0.052  | C  |
| HETATM | 16      | C  | 0 | 3.247  | -0.864 | 1.264  | C  |
| HETATM | 17      | C  | 0 | 4.513  | -0.271 | 1.214  | C  |
| HETATM | 18      | C  | 0 | 5.127  | 0.045  | -0.003 | C  |
| HETATM | 19      | C  | 0 | 4.456  | -0.261 | -1.194 | C  |
| HETATM | 20      | C  | 0 | 3.189  | -0.855 | -1.189 | C  |
| HETATM | 21      | C  | 0 | -2.585 | -2.033 | -2.264 | C  |
| HETATM | 22      | C  | 0 | -6.098 | 0.485  | 0.307  | C  |
| HETATM | 23      | C  | 0 | -1.991 | -1.159 | 2.687  | C  |
| HETATM | 24      | C  | 0 | 2.589  | -1.163 | 2.575  | C  |
| HETATM | 25      | C  | 0 | 6.464  | 0.721  | -0.032 | C  |
| HETATM | 26      | C  | 0 | 2.475  | -1.158 | -2.470 | C  |
| HETATM | 27      | H  | 0 | -0.947 | -3.955 | -0.424 | H  |
| HETATM | 28      | H  | 0 | -0.744 | -3.612 | 1.318  | H  |
| HETATM | 29      | H  | 0 | 1.392  | -3.617 | -0.847 | H  |
| HETATM | 30      | H  | 0 | 1.630  | -3.647 | 0.918  | H  |
| HETATM | 31      | H  | 0 | -4.914 | -0.730 | -1.827 | H  |
| HETATM | 32      | H  | 0 | -4.376 | 0.058  | 2.380  | H  |
| HETATM | 33      | H  | 0 | 5.031  | -0.048 | 2.156  | H  |
| HETATM | 34      | H  | 0 | 4.931  | -0.034 | -2.157 | H  |
| HETATM | 35      | H  | 0 | -2.889 | -3.099 | -2.286 | H  |
| HETATM | 36      | H  | 0 | -1.493 | -1.988 | -2.391 | H  |
| HETATM | 37      | H  | 0 | -3.034 | -1.547 | -3.145 | H  |
| HETATM | 38      | H  | 0 | -6.805 | 0.079  | -0.436 | H  |

|        |    |   |   |        |        |        |   |
|--------|----|---|---|--------|--------|--------|---|
| HETATM | 39 | H | 0 | -5.979 | 1.561  | 0.076  | H |
| HETATM | 40 | H | 0 | -6.573 | 0.426  | 1.301  | H |
| HETATM | 41 | H | 0 | -2.341 | -2.096 | 3.165  | H |
| HETATM | 42 | H | 0 | -0.901 | -1.231 | 2.555  | H |
| HETATM | 43 | H | 0 | -2.167 | -0.340 | 3.402  | H |
| HETATM | 44 | H | 0 | 2.202  | -2.198 | 2.627  | H |
| HETATM | 45 | H | 0 | 1.725  | -0.488 | 2.737  | H |
| HETATM | 46 | H | 0 | 3.288  | -1.024 | 3.415  | H |
| HETATM | 47 | H | 0 | 7.077  | 0.463  | 0.848  | H |
| HETATM | 48 | H | 0 | 6.356  | 1.823  | -0.030 | H |
| HETATM | 49 | H | 0 | 7.040  | 0.462  | -0.937 | H |
| HETATM | 50 | H | 0 | 3.109  | -0.931 | -3.343 | H |
| HETATM | 51 | H | 0 | 1.541  | -0.569 | -2.569 | H |
| HETATM | 52 | H | 0 | 2.181  | -2.222 | -2.543 | H |
| HETATM | 53 | C | 0 | 1.247  | 1.964  | -0.583 | C |
| HETATM | 54 | H | 0 | 1.607  | 2.068  | -1.627 | H |
| HETATM | 55 | H | 0 | 1.838  | 2.471  | 0.205  | H |
| HETATM | 56 | C | 0 | -1.683 | 2.537  | -0.260 | C |
| HETATM | 57 | C | 0 | -0.518 | 3.281  | -0.536 | C |
| HETATM | 58 | H | 0 | -2.322 | 2.256  | -1.106 | H |
| HETATM | 59 | H | 0 | -2.141 | 2.680  | 0.729  | H |
| HETATM | 60 | H | 0 | -0.256 | 3.579  | -1.561 | H |
| HETATM | 61 | F | 0 | -0.066 | 4.138  | 0.381  | F |

END

### a3NB.pdb

| TITLE  | a3NB.pdb |    |   |        |        |        |    |
|--------|----------|----|---|--------|--------|--------|----|
| HETATM | 1        | Ru | 0 | 0.046  | 0.971  | -0.140 | Ru |
| HETATM | 2        | C  | 0 | -0.857 | -3.176 | 0.384  | C  |
| HETATM | 3        | C  | 0 | 0.662  | -3.243 | 0.189  | C  |
| HETATM | 4        | H  | 0 | -1.414 | -3.759 | -0.370 | H  |
| HETATM | 5        | H  | 0 | 0.959  | -3.816 | -0.709 | H  |
| HETATM | 6        | C  | 0 | -0.032 | -1.022 | 0.068  | C  |
| HETATM | 7        | N  | 0 | 1.038  | -1.834 | 0.040  | N  |
| HETATM | 8        | N  | 0 | -1.150 | -1.747 | 0.234  | N  |
| HETATM | 9        | Cl | 0 | -0.872 | 0.638  | -2.394 | Cl |
| HETATM | 10       | Cl | 0 | 0.967  | 1.411  | 2.028  | Cl |
| HETATM | 11       | C  | 0 | -1.231 | 2.471  | -0.056 | C  |
| HETATM | 12       | H  | 0 | -1.468 | 2.818  | 0.964  | H  |
| HETATM | 13       | C  | 0 | 2.384  | -1.350 | -0.009 | C  |
| HETATM | 14       | C  | 0 | 3.093  | -1.170 | 1.194  | C  |
| HETATM | 15       | C  | 0 | 2.958  | -1.031 | -1.255 | C  |
| HETATM | 16       | C  | 0 | 4.374  | -0.615 | 1.132  | C  |
| HETATM | 17       | C  | 0 | 4.243  | -0.478 | -1.269 | C  |
| HETATM | 18       | C  | 0 | 4.956  | -0.248 | -0.087 | C  |
| HETATM | 19       | H  | 0 | 4.923  | -0.448 | 2.067  | H  |
| HETATM | 20       | H  | 0 | 4.698  | -0.220 | -2.235 | H  |
| HETATM | 21       | C  | 0 | -2.468 | -1.195 | 0.271  | C  |
| HETATM | 22       | C  | 0 | -2.910 | -0.549 | 1.442  | C  |
| HETATM | 23       | C  | 0 | -3.303 | -1.313 | -0.857 | C  |
| HETATM | 24       | C  | 0 | -4.181 | 0.034  | 1.441  | C  |
| HETATM | 25       | C  | 0 | -4.566 | -0.717 | -0.812 | C  |
| HETATM | 26       | C  | 0 | -5.014 | -0.025 | 0.319  | C  |
| HETATM | 27       | H  | 0 | -4.531 | 0.542  | 2.350  | H  |
| HETATM | 28       | H  | 0 | -5.213 | -0.786 | -1.696 | H  |
| HETATM | 29       | C  | 0 | 2.503  | -1.570 | 2.511  | C  |
| HETATM | 30       | H  | 0 | 2.945  | -0.989 | 3.336  | H  |
| HETATM | 31       | H  | 0 | 1.414  | -1.395 | 2.544  | H  |
| HETATM | 32       | H  | 0 | 2.685  | -2.641 | 2.731  | H  |
| HETATM | 33       | C  | 0 | 2.214  | -1.274 | -2.531 | C  |
| HETATM | 34       | H  | 0 | 1.864  | -2.320 | -2.613 | H  |

|        |    |   |   |        |        |        |   |
|--------|----|---|---|--------|--------|--------|---|
| HETATM | 35 | H | 0 | 1.311  | -0.639 | -2.619 | H |
| HETATM | 36 | H | 0 | 2.853  | -1.070 | -3.407 | H |
| HETATM | 37 | C | 0 | 6.307  | 0.399  | -0.119 | C |
| HETATM | 38 | H | 0 | 6.232  | 1.485  | 0.081  | H |
| HETATM | 39 | H | 0 | 6.983  | -0.014 | 0.649  | H |
| HETATM | 40 | H | 0 | 6.797  | 0.288  | -1.101 | H |
| HETATM | 41 | C | 0 | -2.052 | -0.487 | 2.669  | C |
| HETATM | 42 | H | 0 | -2.651 | -0.223 | 3.556  | H |
| HETATM | 43 | H | 0 | -1.550 | -1.449 | 2.877  | H |
| HETATM | 44 | H | 0 | -1.243 | 0.267  | 2.586  | H |
| HETATM | 45 | C | 0 | -2.873 | -2.076 | -2.073 | C |
| HETATM | 46 | H | 0 | -3.181 | -3.139 | -2.013 | H |
| HETATM | 47 | H | 0 | -3.334 | -1.659 | -2.983 | H |
| HETATM | 48 | H | 0 | -1.782 | -2.039 | -2.221 | H |
| HETATM | 49 | C | 0 | -6.353 | 0.648  | 0.321  | C |
| HETATM | 50 | H | 0 | -6.286 | 1.669  | -0.100 | H |
| HETATM | 51 | H | 0 | -7.091 | 0.103  | -0.293 | H |
| HETATM | 52 | H | 0 | -6.763 | 0.750  | 1.339  | H |
| HETATM | 53 | H | 0 | 1.189  | -3.686 | 1.054  | H |
| HETATM | 54 | H | 0 | -1.182 | -3.527 | 1.382  | H |
| HETATM | 55 | C | 0 | 0.036  | 3.199  | -0.611 | C |
| HETATM | 56 | H | 0 | -0.287 | 3.674  | -1.557 | H |
| HETATM | 57 | C | 0 | 1.248  | 2.291  | -0.988 | C |
| HETATM | 58 | H | 0 | 2.143  | 2.564  | -0.406 | H |
| HETATM | 59 | H | 0 | 1.402  | 2.182  | -2.073 | H |
| HETATM | 60 | H | 0 | -2.078 | 2.443  | -0.758 | H |
| HETATM | 61 | F | 0 | 0.436  | 4.170  | 0.271  | F |

END

### a3m.pdb

| TITLE  | a3m.pdb |    |   |        |        |        |    |
|--------|---------|----|---|--------|--------|--------|----|
| HETATM | 1       | Ru | 0 | -0.239 | 0.952  | -0.163 | Ru |
| HETATM | 2       | Cl | 0 | -0.674 | 0.713  | -2.563 | Cl |
| HETATM | 3       | Cl | 0 | 0.049  | 1.406  | 2.194  | Cl |
| HETATM | 4       | C  | 0 | 0.131  | -1.030 | 0.029  | C  |
| HETATM | 5       | N  | 0 | -0.900 | -1.897 | 0.087  | N  |
| HETATM | 6       | C  | 0 | -0.463 | -3.276 | 0.300  | C  |
| HETATM | 7       | C  | 0 | 1.052  | -3.170 | 0.107  | C  |
| HETATM | 8       | N  | 0 | 1.285  | -1.720 | 0.092  | N  |
| HETATM | 9       | C  | 0 | -2.241 | -1.410 | 0.169  | C  |
| HETATM | 10      | C  | 0 | -3.039 | -1.382 | -0.995 | C  |
| HETATM | 11      | C  | 0 | -4.296 | -0.776 | -0.921 | C  |
| HETATM | 12      | C  | 0 | -4.778 | -0.223 | 0.273  | C  |
| HETATM | 13      | C  | 0 | -3.995 | -0.331 | 1.427  | C  |
| HETATM | 14      | C  | 0 | -2.732 | -0.934 | 1.403  | C  |
| HETATM | 15      | C  | 0 | 2.589  | -1.139 | 0.052  | C  |
| HETATM | 16      | C  | 0 | 3.247  | -0.864 | 1.264  | C  |
| HETATM | 17      | C  | 0 | 4.513  | -0.271 | 1.214  | C  |
| HETATM | 18      | C  | 0 | 5.127  | 0.045  | -0.003 | C  |
| HETATM | 19      | C  | 0 | 4.456  | -0.261 | -1.194 | C  |
| HETATM | 20      | C  | 0 | 3.189  | -0.855 | -1.189 | C  |
| HETATM | 21      | C  | 0 | -2.585 | -2.033 | -2.264 | C  |
| HETATM | 22      | C  | 0 | -6.098 | 0.485  | 0.307  | C  |
| HETATM | 23      | C  | 0 | -1.991 | -1.159 | 2.687  | C  |
| HETATM | 24      | C  | 0 | 2.589  | -1.163 | 2.575  | C  |
| HETATM | 25      | C  | 0 | 6.464  | 0.721  | -0.032 | C  |
| HETATM | 26      | C  | 0 | 2.475  | -1.158 | -2.470 | C  |
| HETATM | 27      | H  | 0 | -0.947 | -3.955 | -0.424 | H  |
| HETATM | 28      | H  | 0 | -0.744 | -3.612 | 1.318  | H  |
| HETATM | 29      | H  | 0 | 1.392  | -3.617 | -0.847 | H  |
| HETATM | 30      | H  | 0 | 1.630  | -3.647 | 0.918  | H  |

|        |    |   |   |        |        |        |   |
|--------|----|---|---|--------|--------|--------|---|
| HETATM | 31 | H | 0 | -4.914 | -0.730 | -1.827 | H |
| HETATM | 32 | H | 0 | -4.376 | 0.058  | 2.380  | H |
| HETATM | 33 | H | 0 | 5.031  | -0.048 | 2.156  | H |
| HETATM | 34 | H | 0 | 4.931  | -0.034 | -2.157 | H |
| HETATM | 35 | H | 0 | -2.889 | -3.099 | -2.286 | H |
| HETATM | 36 | H | 0 | -1.493 | -1.988 | -2.391 | H |
| HETATM | 37 | H | 0 | -3.034 | -1.547 | -3.145 | H |
| HETATM | 38 | H | 0 | -6.805 | 0.079  | -0.436 | H |
| HETATM | 39 | H | 0 | -5.979 | 1.561  | 0.076  | H |
| HETATM | 40 | H | 0 | -6.573 | 0.426  | 1.301  | H |
| HETATM | 41 | H | 0 | -2.341 | -2.096 | 3.165  | H |
| HETATM | 42 | H | 0 | -0.901 | -1.231 | 2.555  | H |
| HETATM | 43 | H | 0 | -2.167 | -0.340 | 3.402  | H |
| HETATM | 44 | H | 0 | 2.202  | -2.198 | 2.627  | H |
| HETATM | 45 | H | 0 | 1.725  | -0.488 | 2.737  | H |
| HETATM | 46 | H | 0 | 3.288  | -1.024 | 3.415  | H |
| HETATM | 47 | H | 0 | 7.077  | 0.463  | 0.848  | H |
| HETATM | 48 | H | 0 | 6.356  | 1.823  | -0.030 | H |
| HETATM | 49 | H | 0 | 7.040  | 0.462  | -0.937 | H |
| HETATM | 50 | H | 0 | 3.109  | -0.931 | -3.343 | H |
| HETATM | 51 | H | 0 | 1.541  | -0.569 | -2.569 | H |
| HETATM | 52 | H | 0 | 2.181  | -2.222 | -2.543 | H |
| HETATM | 53 | C | 0 | 1.247  | 1.964  | -0.583 | C |
| HETATM | 54 | H | 0 | 1.607  | 2.068  | -1.627 | H |
| HETATM | 55 | H | 0 | 1.838  | 2.471  | 0.205  | H |
| HETATM | 56 | C | 0 | -1.683 | 2.537  | -0.260 | C |
| HETATM | 57 | C | 0 | -0.518 | 3.281  | -0.536 | C |
| HETATM | 58 | H | 0 | -2.322 | 2.256  | -1.106 | H |
| HETATM | 59 | H | 0 | -2.141 | 2.680  | 0.729  | H |
| HETATM | 60 | H | 0 | -0.256 | 3.579  | -1.561 | H |
| HETATM | 61 | F | 0 | -0.066 | 4.138  | 0.381  | F |

END

### a3n.pdb

| TITLE  | a3n.pdb |    |   |        |        |        |    |
|--------|---------|----|---|--------|--------|--------|----|
| HETATM | 1       | Ru | 0 | -0.271 | 0.974  | 0.170  | Ru |
| HETATM | 2       | C  | 0 | -0.372 | -3.236 | -0.070 | C  |
| HETATM | 3       | C  | 0 | 1.147  | -3.094 | 0.027  | C  |
| HETATM | 4       | H  | 0 | -0.703 | -3.623 | -1.054 | H  |
| HETATM | 5       | H  | 0 | 1.684  | -3.569 | -0.813 | H  |
| HETATM | 6       | C  | 0 | 0.185  | -0.959 | 0.068  | C  |
| HETATM | 7       | N  | 0 | 1.351  | -1.642 | 0.003  | N  |
| HETATM | 8       | N  | 0 | -0.831 | -1.861 | 0.112  | N  |
| HETATM | 9       | Cl | 0 | -0.701 | 1.339  | -2.187 | Cl |
| HETATM | 10      | Cl | 0 | -0.080 | 0.922  | 2.606  | Cl |
| HETATM | 11      | C  | 0 | -1.890 | 2.715  | 0.425  | C  |
| HETATM | 12      | C  | 0 | 2.653  | -1.073 | -0.091 | C  |
| HETATM | 13      | C  | 0 | 3.442  | -0.934 | 1.067  | C  |
| HETATM | 14      | C  | 0 | 3.131  | -0.668 | -1.353 | C  |
| HETATM | 15      | C  | 0 | 4.717  | -0.374 | 0.940  | C  |
| HETATM | 16      | C  | 0 | 4.411  | -0.108 | -1.434 | C  |
| HETATM | 17      | C  | 0 | 5.214  | 0.051  | -0.299 | C  |
| HETATM | 18      | H  | 0 | 5.335  | -0.256 | 1.839  | H  |
| HETATM | 19      | H  | 0 | 4.788  | 0.212  | -2.414 | H  |
| HETATM | 20      | C  | 0 | -2.193 | -1.444 | -0.013 | C  |
| HETATM | 21      | C  | 0 | -2.970 | -1.264 | 1.153  | C  |
| HETATM | 22      | C  | 0 | -2.745 | -1.237 | -1.294 | C  |
| HETATM | 23      | C  | 0 | -4.269 | -0.763 | 1.012  | C  |
| HETATM | 24      | C  | 0 | -4.049 | -0.738 | -1.385 | C  |
| HETATM | 25      | C  | 0 | -4.813 | -0.471 | -0.244 | C  |
| HETATM | 26      | H  | 0 | -4.877 | -0.611 | 1.914  | H  |



|        |    |   |   |        |        |        |   |
|--------|----|---|---|--------|--------|--------|---|
| HETATM | 27 | H | 0 | -4.475 | -0.553 | -2.379 | H |
| HETATM | 28 | C | 0 | 2.901  | -1.313 | 2.410  | C |
| HETATM | 29 | H | 0 | 3.636  | -1.111 | 3.207  | H |
| HETATM | 30 | H | 0 | 1.982  | -0.740 | 2.644  | H |
| HETATM | 31 | H | 0 | 2.636  | -2.384 | 2.476  | H |
| HETATM | 32 | C | 0 | 2.274  | -0.812 | -2.572 | C |
| HETATM | 33 | H | 0 | 1.840  | -1.826 | -2.659 | H |
| HETATM | 34 | H | 0 | 1.417  | -0.108 | -2.554 | H |
| HETATM | 35 | H | 0 | 2.849  | -0.612 | -3.491 | H |
| HETATM | 36 | C | 0 | 6.567  | 0.686  | -0.401 | C |
| HETATM | 37 | H | 0 | 6.512  | 1.777  | -0.223 | H |
| HETATM | 38 | H | 0 | 7.272  | 0.281  | 0.345  | H |
| HETATM | 39 | H | 0 | 7.013  | 0.552  | -1.401 | H |
| HETATM | 40 | C | 0 | -2.441 | -1.649 | 2.499  | C |
| HETATM | 41 | H | 0 | -3.206 | -1.504 | 3.279  | H |
| HETATM | 42 | H | 0 | -2.138 | -2.712 | 2.524  | H |
| HETATM | 43 | H | 0 | -1.555 | -1.051 | 2.780  | H |
| HETATM | 44 | C | 0 | -2.000 | -1.609 | -2.539 | C |
| HETATM | 45 | H | 0 | -2.227 | -2.655 | -2.828 | H |
| HETATM | 46 | H | 0 | -2.288 | -0.964 | -3.384 | H |
| HETATM | 47 | H | 0 | -0.908 | -1.516 | -2.429 | H |
| HETATM | 48 | C | 0 | -6.187 | 0.116  | -0.366 | C |
| HETATM | 49 | H | 0 | -6.146 | 1.222  | -0.405 | H |
| HETATM | 50 | H | 0 | -6.697 | -0.212 | -1.287 | H |
| HETATM | 51 | H | 0 | -6.827 | -0.147 | 0.493  | H |
| HETATM | 52 | H | 0 | 1.554  | -3.523 | 0.963  | H |
| HETATM | 53 | H | 0 | -0.795 | -3.898 | 0.706  | H |
| HETATM | 54 | C | 0 | -0.795 | 3.485  | 0.640  | C |
| HETATM | 55 | C | 0 | 1.414  | 1.636  | 0.007  | C |
| HETATM | 56 | H | 0 | 2.194  | 1.505  | 0.787  | H |
| HETATM | 57 | H | 0 | 1.700  | 2.257  | -0.871 | H |
| HETATM | 58 | H | 0 | -2.338 | 2.195  | 1.281  | H |
| HETATM | 59 | H | 0 | -0.253 | 3.559  | 1.591  | H |
| HETATM | 60 | H | 0 | -2.437 | 2.787  | -0.521 | H |
| HETATM | 61 | F | 0 | -0.335 | 4.308  | -0.291 | F |

END

#### 4a.pdb

| TITLE  | 4a.pdb |    |   |        |        |        |    |
|--------|--------|----|---|--------|--------|--------|----|
| HETATM | 1      | Ru | 0 | -0.298 | 0.542  | 0.034  | Ru |
| HETATM | 2      | C  | 0 | 0.227  | -3.577 | 0.133  | C  |
| HETATM | 3      | C  | 0 | 1.710  | -3.236 | -0.020 | C  |
| HETATM | 4      | H  | 0 | -0.153 | -4.220 | -0.682 | H  |
| HETATM | 5      | H  | 0 | 2.134  | -3.579 | -0.984 | H  |
| HETATM | 6      | C  | 0 | 0.493  | -1.241 | 0.055  | C  |
| HETATM | 7      | N  | 0 | 1.736  | -1.769 | 0.037  | N  |
| HETATM | 8      | N  | 0 | -0.403 | -2.263 | 0.088  | N  |
| HETATM | 9      | Cl | 0 | -0.725 | 0.715  | -2.317 | Cl |
| HETATM | 10     | Cl | 0 | -0.403 | 0.673  | 2.428  | Cl |
| HETATM | 11     | C  | 0 | -2.624 | 2.351  | 0.194  | C  |
| HETATM | 12     | C  | 0 | 2.972  | -1.064 | -0.035 | C  |
| HETATM | 13     | C  | 0 | 3.703  | -0.858 | 1.150  | C  |
| HETATM | 14     | C  | 0 | 3.455  | -0.626 | -1.280 | C  |
| HETATM | 15     | C  | 0 | 4.942  | -0.219 | 1.066  | C  |
| HETATM | 16     | C  | 0 | 4.693  | 0.027  | -1.318 | C  |
| HETATM | 17     | C  | 0 | 5.449  | 0.233  | -0.159 | C  |
| HETATM | 18     | H  | 0 | 5.518  | -0.051 | 1.985  | H  |
| HETATM | 19     | H  | 0 | 5.079  | 0.375  | -2.286 | H  |
| HETATM | 20     | C  | 0 | -1.807 | -2.011 | 0.012  | C  |
| HETATM | 21     | C  | 0 | -2.558 | -1.832 | 1.197  | C  |
| HETATM | 22     | C  | 0 | -2.426 | -1.951 | -1.256 | C  |

|        |    |   |   |        |        |        |   |
|--------|----|---|---|--------|--------|--------|---|
| HETATM | 23 | C | 0 | -3.898 | -1.448 | 1.078  | C |
| HETATM | 24 | C | 0 | -3.769 | -1.571 | -1.323 | C |
| HETATM | 25 | C | 0 | -4.508 | -1.282 | -0.170 | C |
| HETATM | 26 | H | 0 | -4.480 | -1.278 | 1.993  | H |
| HETATM | 27 | H | 0 | -4.246 | -1.488 | -2.308 | H |
| HETATM | 28 | C | 0 | 3.114  | -1.237 | 2.473  | C |
| HETATM | 29 | H | 0 | 3.820  | -1.050 | 3.297  | H |
| HETATM | 30 | H | 0 | 2.195  | -0.652 | 2.673  | H |
| HETATM | 31 | H | 0 | 2.820  | -2.303 | 2.522  | H |
| HETATM | 32 | C | 0 | 2.655  | -0.829 | -2.529 | C |
| HETATM | 33 | H | 0 | 2.286  | -1.867 | -2.626 | H |
| HETATM | 34 | H | 0 | 1.756  | -0.182 | -2.554 | H |
| HETATM | 35 | H | 0 | 3.252  | -0.600 | -3.428 | H |
| HETATM | 36 | C | 0 | 6.762  | 0.955  | -0.221 | C |
| HETATM | 37 | H | 0 | 6.636  | 2.035  | -0.017 | H |
| HETATM | 38 | H | 0 | 7.478  | 0.574  | 0.527  | H |
| HETATM | 39 | H | 0 | 7.231  | 0.873  | -1.216 | H |
| HETATM | 40 | C | 0 | -1.985 | -2.142 | 2.545  | C |
| HETATM | 41 | H | 0 | -2.374 | -1.457 | 3.315  | H |
| HETATM | 42 | H | 0 | -2.266 | -3.171 | 2.845  | H |
| HETATM | 43 | H | 0 | -0.888 | -2.064 | 2.571  | H |
| HETATM | 44 | C | 0 | -1.700 | -2.353 | -2.502 | C |
| HETATM | 45 | H | 0 | -1.872 | -3.428 | -2.717 | H |
| HETATM | 46 | H | 0 | -2.055 | -1.781 | -3.374 | H |
| HETATM | 47 | H | 0 | -0.613 | -2.193 | -2.434 | H |
| HETATM | 48 | C | 0 | -5.918 | -0.788 | -0.268 | C |
| HETATM | 49 | H | 0 | -5.944 | 0.317  | -0.309 | H |
| HETATM | 50 | H | 0 | -6.422 | -1.150 | -1.181 | H |
| HETATM | 51 | H | 0 | -6.524 | -1.086 | 0.604  | H |
| HETATM | 52 | H | 0 | 2.339  | -3.662 | 0.782  | H |
| HETATM | 53 | H | 0 | -0.002 | -4.082 | 1.091  | H |
| HETATM | 54 | C | 0 | -1.568 | 3.180  | 0.083  | C |
| HETATM | 55 | C | 0 | 1.238  | 1.524  | -0.029 | C |
| HETATM | 56 | F | 0 | -3.327 | 1.952  | -0.835 | F |
| HETATM | 57 | F | 0 | -3.141 | 1.999  | 1.342  | F |
| HETATM | 58 | F | 0 | -0.952 | 3.689  | 1.122  | F |
| HETATM | 59 | F | 0 | -1.178 | 3.685  | -1.057 | F |
| HETATM | 60 | F | 0 | 2.186  | 1.599  | 0.877  | F |
| HETATM | 61 | F | 0 | 1.559  | 2.402  | -0.959 | F |

END

## 4b.pdb

|        |        |    |   |        |        |        |    |
|--------|--------|----|---|--------|--------|--------|----|
| TITLE  | 4b.pdb |    |   |        |        |        |    |
| HETATM | 1      | Ru | 0 | -0.144 | 0.637  | -0.001 | Ru |
| HETATM | 2      | C  | 0 | -0.430 | -3.665 | 0.169  | C  |
| HETATM | 3      | C  | 0 | 1.091  | -3.544 | 0.011  | C  |
| HETATM | 4      | H  | 0 | -0.899 | -4.292 | -0.609 | H  |
| HETATM | 5      | H  | 0 | 1.464  | -3.996 | -0.927 | H  |
| HETATM | 6      | C  | 0 | 0.153  | -1.416 | -0.015 | C  |
| HETATM | 7      | N  | 0 | 1.308  | -2.091 | -0.014 | N  |
| HETATM | 8      | N  | 0 | -0.875 | -2.274 | 0.047  | N  |
| HETATM | 9      | Cl | 0 | -0.999 | 0.478  | -2.267 | Cl |
| HETATM | 10     | Cl | 0 | 0.717  | 0.585  | 2.256  | Cl |
| HETATM | 11     | C  | 0 | -1.617 | 2.029  | 0.447  | C  |
| HETATM | 12     | C  | 0 | 2.593  | -1.469 | -0.072 | C  |
| HETATM | 13     | C  | 0 | 3.370  | -1.368 | 1.096  | C  |
| HETATM | 14     | C  | 0 | 3.051  | -0.958 | -1.303 | C  |
| HETATM | 15     | C  | 0 | 4.588  | -0.683 | 1.024  | C  |
| HETATM | 16     | C  | 0 | 4.272  | -0.276 | -1.327 | C  |
| HETATM | 17     | C  | 0 | 5.044  | -0.116 | -0.170 | C  |
| HETATM | 18     | H  | 0 | 5.189  | -0.580 | 1.936  | H  |

|        |    |   |   |        |        |        |   |
|--------|----|---|---|--------|--------|--------|---|
| HETATM | 19 | H | 0 | 4.633  | 0.130  | -2.281 | H |
| HETATM | 20 | C | 0 | -2.222 | -1.798 | 0.108  | C |
| HETATM | 21 | C | 0 | -2.707 | -1.224 | 1.301  | C |
| HETATM | 22 | C | 0 | -3.013 | -1.840 | -1.059 | C |
| HETATM | 23 | C | 0 | -3.961 | -0.594 | 1.267  | C |
| HETATM | 24 | C | 0 | -4.261 | -1.219 | -1.036 | C |
| HETATM | 25 | C | 0 | -4.734 | -0.558 | 0.107  | C |
| HETATM | 26 | H | 0 | -4.330 | -0.115 | 2.184  | H |
| HETATM | 27 | H | 0 | -4.865 | -1.213 | -1.952 | H |
| HETATM | 28 | C | 0 | 2.935  | -1.993 | 2.387  | C |
| HETATM | 29 | H | 0 | 3.297  | -1.410 | 3.250  | H |
| HETATM | 30 | H | 0 | 1.838  | -2.045 | 2.475  | H |
| HETATM | 31 | H | 0 | 3.342  | -3.018 | 2.495  | H |
| HETATM | 32 | C | 0 | 2.259  | -1.148 | -2.561 | C |
| HETATM | 33 | H | 0 | 1.943  | -2.199 | -2.693 | H |
| HETATM | 34 | H | 0 | 1.328  | -0.548 | -2.580 | H |
| HETATM | 35 | H | 0 | 2.851  | -0.864 | -3.446 | H |
| HETATM | 36 | C | 0 | 6.322  | 0.666  | -0.207 | C |
| HETATM | 37 | H | 0 | 6.816  | 0.602  | -1.191 | H |
| HETATM | 38 | H | 0 | 6.138  | 1.740  | -0.014 | H |
| HETATM | 39 | H | 0 | 7.038  | 0.325  | 0.560  | H |
| HETATM | 40 | C | 0 | -1.989 | -1.331 | 2.612  | C |
| HETATM | 41 | H | 0 | -2.604 | -1.909 | 3.328  | H |
| HETATM | 42 | H | 0 | -1.005 | -1.819 | 2.537  | H |
| HETATM | 43 | H | 0 | -1.809 | -0.340 | 3.062  | H |
| HETATM | 44 | C | 0 | -2.520 | -2.524 | -2.296 | C |
| HETATM | 45 | H | 0 | -2.662 | -3.622 | -2.240 | H |
| HETATM | 46 | H | 0 | -3.061 | -2.172 | -3.188 | H |
| HETATM | 47 | H | 0 | -1.448 | -2.326 | -2.467 | H |
| HETATM | 48 | C | 0 | -6.020 | 0.206  | 0.066  | C |
| HETATM | 49 | H | 0 | -5.847 | 1.231  | -0.318 | H |
| HETATM | 50 | H | 0 | -6.761 | -0.260 | -0.604 | H |
| HETATM | 51 | H | 0 | -6.474 | 0.312  | 1.066  | H |
| HETATM | 52 | H | 0 | 1.652  | -4.000 | 0.846  | H |
| HETATM | 53 | H | 0 | -0.732 | -4.069 | 1.154  | H |
| HETATM | 54 | C | 0 | -0.506 | 2.880  | 0.087  | C |
| HETATM | 55 | C | 0 | 1.228  | 1.806  | -0.530 | C |
| HETATM | 56 | F | 0 | -2.692 | 2.056  | -0.335 | F |
| HETATM | 57 | F | 0 | -2.002 | 2.022  | 1.726  | F |
| HETATM | 58 | F | 0 | -0.632 | 3.594  | -1.027 | F |
| HETATM | 59 | F | 0 | 0.066  | 3.593  | 1.050  | F |
| HETATM | 60 | F | 0 | 1.464  | 2.212  | -1.752 | F |
| HETATM | 61 | F | 0 | 2.188  | 2.273  | 0.223  | F |

END

#### 4NA.pdb

|        |         |    |   |        |        |        |    |
|--------|---------|----|---|--------|--------|--------|----|
| TITLE  | 4NA.pdb |    |   |        |        |        |    |
| HETATM | 1       | Ru | 0 | 0.017  | 0.582  | 0.002  | Ru |
| HETATM | 2       | C  | 0 | -0.818 | -3.603 | 0.081  | C  |
| HETATM | 3       | C  | 0 | 0.708  | -3.626 | -0.077 | C  |
| HETATM | 4       | H  | 0 | -1.347 | -4.108 | -0.747 | H  |
| HETATM | 5       | H  | 0 | 1.041  | -4.092 | -1.023 | H  |
| HETATM | 6       | C  | 0 | -0.023 | -1.430 | 0.003  | C  |
| HETATM | 7       | N  | 0 | 1.065  | -2.200 | -0.069 | N  |
| HETATM | 8       | N  | 0 | -1.133 | -2.168 | 0.075  | N  |
| HETATM | 9       | Cl | 0 | -0.797 | 0.498  | -2.270 | Cl |
| HETATM | 10      | Cl | 0 | 0.819  | 0.481  | 2.279  | Cl |
| HETATM | 11      | C  | 0 | -1.244 | 2.037  | 0.420  | C  |
| HETATM | 12      | C  | 0 | 2.393  | -1.666 | -0.108 | C  |
| HETATM | 13      | C  | 0 | 3.156  | -1.628 | 1.077  | C  |
| HETATM | 14      | C  | 0 | 2.896  | -1.157 | -1.321 | C  |

|        |    |   |   |        |        |        |   |
|--------|----|---|---|--------|--------|--------|---|
| HETATM | 15 | C | 0 | 4.393  | -0.984 | 1.045  | C |
| HETATM | 16 | C | 0 | 4.143  | -0.518 | -1.303 | C |
| HETATM | 17 | C | 0 | 4.889  | -0.400 | -0.128 | C |
| HETATM | 18 | H | 0 | 4.980  | -0.922 | 1.971  | H |
| HETATM | 19 | H | 0 | 4.537  | -0.106 | -2.240 | H |
| HETATM | 20 | C | 0 | -2.450 | -1.606 | 0.107  | C |
| HETATM | 21 | C | 0 | -2.951 | -1.091 | 1.319  | C |
| HETATM | 22 | C | 0 | -3.211 | -1.562 | -1.079 | C |
| HETATM | 23 | C | 0 | -4.195 | -0.449 | 1.301  | C |
| HETATM | 24 | C | 0 | -4.446 | -0.913 | -1.047 | C |
| HETATM | 25 | C | 0 | -4.943 | -0.331 | 0.126  | C |
| HETATM | 26 | H | 0 | -4.589 | -0.037 | 2.239  | H |
| HETATM | 27 | H | 0 | -5.033 | -0.851 | -1.972 | H |
| HETATM | 28 | C | 0 | 2.679  | -2.282 | 2.338  | C |
| HETATM | 29 | H | 0 | 3.096  | -1.781 | 3.226  | H |
| HETATM | 30 | H | 0 | 1.582  | -2.251 | 2.437  | H |
| HETATM | 31 | H | 0 | 2.999  | -3.343 | 2.383  | H |
| HETATM | 32 | C | 0 | 2.151  | -1.291 | -2.613 | C |
| HETATM | 33 | H | 0 | 1.472  | -2.160 | -2.622 | H |
| HETATM | 34 | H | 0 | 1.512  | -0.412 | -2.822 | H |
| HETATM | 35 | H | 0 | 2.854  | -1.396 | -3.457 | H |
| HETATM | 36 | C | 0 | 6.182  | 0.356  | -0.113 | C |
| HETATM | 37 | H | 0 | 6.021  | 1.400  | 0.219  | H |
| HETATM | 38 | H | 0 | 6.914  | -0.085 | 0.584  | H |
| HETATM | 39 | H | 0 | 6.644  | 0.407  | -1.113 | H |
| HETATM | 40 | C | 0 | -2.202 | -1.228 | 2.609  | C |
| HETATM | 41 | H | 0 | -2.901 | -1.272 | 3.462  | H |
| HETATM | 42 | H | 0 | -1.570 | -2.132 | 2.637  | H |
| HETATM | 43 | H | 0 | -1.515 | -0.380 | 2.789  | H |
| HETATM | 44 | C | 0 | -2.737 | -2.218 | -2.339 | C |
| HETATM | 45 | H | 0 | -3.076 | -3.272 | -2.394 | H |
| HETATM | 46 | H | 0 | -3.139 | -1.704 | -3.227 | H |
| HETATM | 47 | H | 0 | -1.639 | -2.205 | -2.432 | H |
| HETATM | 48 | C | 0 | -6.239 | 0.419  | 0.115  | C |
| HETATM | 49 | H | 0 | -6.075 | 1.482  | -0.144 | H |
| HETATM | 50 | H | 0 | -6.945 | 0.017  | -0.631 | H |
| HETATM | 51 | H | 0 | -6.733 | 0.405  | 1.101  | H |
| HETATM | 52 | H | 0 | 1.222  | -4.146 | 0.751  | H |
| HETATM | 53 | H | 0 | -1.164 | -4.060 | 1.026  | H |
| HETATM | 54 | C | 0 | 0.060  | 2.876  | -0.003 | C |
| HETATM | 55 | C | 0 | 1.331  | 1.986  | -0.425 | C |
| HETATM | 56 | F | 0 | -2.286 | 2.310  | -0.356 | F |
| HETATM | 57 | F | 0 | -1.612 | 2.293  | 1.674  | F |
| HETATM | 58 | F | 0 | -0.269 | 3.659  | -1.044 | F |
| HETATM | 59 | F | 0 | 0.421  | 3.648  | 1.035  | F |
| HETATM | 60 | F | 0 | 1.707  | 2.220  | -1.681 | F |
| HETATM | 61 | F | 0 | 2.384  | 2.226  | 0.349  | F |

END

### s5a.pdb

|        |         |    |   |        |        |        |    |
|--------|---------|----|---|--------|--------|--------|----|
| TITLE  | s5a.pdb |    |   |        |        |        |    |
| HETATM | 1       | Ru | 0 | -0.232 | 0.443  | -0.028 | Ru |
| HETATM | 2       | C  | 0 | 0.506  | -3.629 | 0.239  | C  |
| HETATM | 3       | C  | 0 | 1.976  | -3.214 | 0.130  | C  |
| HETATM | 4       | H  | 0 | 0.192  | -4.312 | -0.572 | H  |
| HETATM | 5       | H  | 0 | 2.459  | -3.579 | -0.796 | H  |
| HETATM | 6       | C  | 0 | 0.653  | -1.288 | 0.086  | C  |
| HETATM | 7       | N  | 0 | 1.921  | -1.747 | 0.115  | N  |
| HETATM | 8       | N  | 0 | -0.190 | -2.353 | 0.139  | N  |
| HETATM | 9       | Cl | 0 | -0.596 | 0.497  | -2.394 | Cl |
| HETATM | 10      | Cl | 0 | -0.375 | 0.687  | 2.355  | Cl |

|        |    |    |   |        |        |        |    |
|--------|----|----|---|--------|--------|--------|----|
| HETATM | 11 | C  | 0 | -2.698 | 2.255  | -0.102 | C  |
| HETATM | 12 | C  | 0 | 3.117  | -0.974 | 0.046  | C  |
| HETATM | 13 | C  | 0 | 3.794  | -0.663 | 1.239  | C  |
| HETATM | 14 | C  | 0 | 3.613  | -0.571 | -1.206 | C  |
| HETATM | 15 | C  | 0 | 4.993  | 0.049  | 1.159  | C  |
| HETATM | 16 | C  | 0 | 4.808  | 0.160  | -1.241 | C  |
| HETATM | 17 | C  | 0 | 5.510  | 0.472  | -0.072 | C  |
| HETATM | 18 | H  | 0 | 5.526  | 0.298  | 2.085  | H  |
| HETATM | 19 | H  | 0 | 5.202  | 0.483  | -2.213 | H  |
| HETATM | 20 | C  | 0 | -1.602 | -2.164 | 0.033  | C  |
| HETATM | 21 | C  | 0 | -2.376 | -1.957 | 1.197  | C  |
| HETATM | 22 | C  | 0 | -2.203 | -2.178 | -1.247 | C  |
| HETATM | 23 | C  | 0 | -3.725 | -1.621 | 1.042  | C  |
| HETATM | 24 | C  | 0 | -3.554 | -1.841 | -1.349 | C  |
| HETATM | 25 | C  | 0 | -4.320 | -1.526 | -0.221 | C  |
| HETATM | 26 | H  | 0 | -4.325 | -1.423 | 1.939  | H  |
| HETATM | 27 | H  | 0 | -4.018 | -1.813 | -2.344 | H  |
| HETATM | 28 | C  | 0 | 3.183  | -1.007 | 2.561  | C  |
| HETATM | 29 | H  | 0 | 3.847  | -0.732 | 3.397  | H  |
| HETATM | 30 | H  | 0 | 2.223  | -0.469 | 2.698  | H  |
| HETATM | 31 | H  | 0 | 2.952  | -2.084 | 2.662  | H  |
| HETATM | 32 | C  | 0 | 2.871  | -0.895 | -2.466 | C  |
| HETATM | 33 | H  | 0 | 2.607  | -1.967 | -2.529 | H  |
| HETATM | 34 | H  | 0 | 1.916  | -0.339 | -2.541 | H  |
| HETATM | 35 | H  | 0 | 3.470  | -0.646 | -3.357 | H  |
| HETATM | 36 | C  | 0 | 6.775  | 1.274  | -0.131 | C  |
| HETATM | 37 | H  | 0 | 6.579  | 2.348  | 0.051  | H  |
| HETATM | 38 | H  | 0 | 7.502  | 0.955  | 0.636  | H  |
| HETATM | 39 | H  | 0 | 7.265  | 1.202  | -1.117 | H  |
| HETATM | 40 | C  | 0 | -1.818 | -2.191 | 2.566  | C  |
| HETATM | 41 | H  | 0 | -2.235 | -1.483 | 3.299  | H  |
| HETATM | 42 | H  | 0 | -2.080 | -3.213 | 2.907  | H  |
| HETATM | 43 | H  | 0 | -0.723 | -2.088 | 2.607  | H  |
| HETATM | 44 | C  | 0 | -1.440 | -2.612 | -2.460 | C  |
| HETATM | 45 | H  | 0 | -1.515 | -3.711 | -2.589 | H  |
| HETATM | 46 | H  | 0 | -1.840 | -2.144 | -3.373 | H  |
| HETATM | 47 | H  | 0 | -0.371 | -2.350 | -2.406 | H  |
| HETATM | 48 | C  | 0 | -5.740 | -1.075 | -0.363 | C  |
| HETATM | 49 | H  | 0 | -5.791 | 0.022  | -0.497 | H  |
| HETATM | 50 | H  | 0 | -6.232 | -1.523 | -1.243 | H  |
| HETATM | 51 | H  | 0 | -6.343 | -1.314 | 0.530  | H  |
| HETATM | 52 | H  | 0 | 2.590  | -3.565 | 0.979  | H  |
| HETATM | 53 | H  | 0 | 0.270  | -4.124 | 1.201  | H  |
| HETATM | 54 | C  | 0 | -1.642 | 3.090  | -0.209 | C  |
| HETATM | 55 | C  | 0 | 1.246  | 1.512  | -0.095 | C  |
| HETATM | 56 | F  | 0 | -3.296 | 1.784  | -1.182 | F  |
| HETATM | 57 | F  | 0 | -1.085 | 3.675  | 0.819  | F  |
| HETATM | 58 | F  | 0 | -1.162 | 3.499  | -1.351 | F  |
| HETATM | 59 | F  | 0 | 2.161  | 1.685  | 0.831  | F  |
| HETATM | 60 | F  | 0 | 1.535  | 2.373  | -1.052 | F  |
| HETATM | 61 | Cl | 0 | -3.497 | 1.946  | 1.372  | Cl |

END

### s5b.pdb

| TITLE  | s5b.pdb |    |   |        |        |        |    |
|--------|---------|----|---|--------|--------|--------|----|
| HETATM | 1       | Ru | 0 | -0.232 | 0.443  | -0.028 | Ru |
| HETATM | 2       | C  | 0 | 0.506  | -3.629 | 0.239  | C  |
| HETATM | 3       | C  | 0 | 1.976  | -3.214 | 0.130  | C  |
| HETATM | 4       | H  | 0 | 0.192  | -4.312 | -0.572 | H  |
| HETATM | 5       | H  | 0 | 2.459  | -3.579 | -0.796 | H  |
| HETATM | 6       | C  | 0 | 0.653  | -1.288 | 0.086  | C  |

|        |    |    |   |        |        |        |    |
|--------|----|----|---|--------|--------|--------|----|
| HETATM | 7  | N  | 0 | 1.921  | -1.747 | 0.115  | N  |
| HETATM | 8  | N  | 0 | -0.190 | -2.353 | 0.139  | N  |
| HETATM | 9  | Cl | 0 | -0.596 | 0.497  | -2.394 | Cl |
| HETATM | 10 | Cl | 0 | -0.375 | 0.687  | 2.355  | Cl |
| HETATM | 11 | C  | 0 | -2.698 | 2.255  | -0.102 | C  |
| HETATM | 12 | C  | 0 | 3.117  | -0.974 | 0.046  | C  |
| HETATM | 13 | C  | 0 | 3.794  | -0.663 | 1.239  | C  |
| HETATM | 14 | C  | 0 | 3.613  | -0.571 | -1.206 | C  |
| HETATM | 15 | C  | 0 | 4.993  | 0.049  | 1.159  | C  |
| HETATM | 16 | C  | 0 | 4.808  | 0.160  | -1.241 | C  |
| HETATM | 17 | C  | 0 | 5.510  | 0.472  | -0.072 | C  |
| HETATM | 18 | H  | 0 | 5.526  | 0.298  | 2.085  | H  |
| HETATM | 19 | H  | 0 | 5.202  | 0.483  | -2.213 | H  |
| HETATM | 20 | C  | 0 | -1.602 | -2.164 | 0.033  | C  |
| HETATM | 21 | C  | 0 | -2.376 | -1.957 | 1.197  | C  |
| HETATM | 22 | C  | 0 | -2.203 | -2.178 | -1.247 | C  |
| HETATM | 23 | C  | 0 | -3.725 | -1.621 | 1.042  | C  |
| HETATM | 24 | C  | 0 | -3.554 | -1.841 | -1.349 | C  |
| HETATM | 25 | C  | 0 | -4.320 | -1.526 | -0.221 | C  |
| HETATM | 26 | H  | 0 | -4.325 | -1.423 | 1.939  | H  |
| HETATM | 27 | H  | 0 | -4.018 | -1.813 | -2.344 | H  |
| HETATM | 28 | C  | 0 | 3.183  | -1.007 | 2.561  | C  |
| HETATM | 29 | H  | 0 | 3.847  | -0.732 | 3.397  | H  |
| HETATM | 30 | H  | 0 | 2.223  | -0.469 | 2.698  | H  |
| HETATM | 31 | H  | 0 | 2.952  | -2.084 | 2.662  | H  |
| HETATM | 32 | C  | 0 | 2.871  | -0.895 | -2.466 | C  |
| HETATM | 33 | H  | 0 | 2.607  | -1.967 | -2.529 | H  |
| HETATM | 34 | H  | 0 | 1.916  | -0.339 | -2.541 | H  |
| HETATM | 35 | H  | 0 | 3.470  | -0.646 | -3.357 | H  |
| HETATM | 36 | C  | 0 | 6.775  | 1.274  | -0.131 | C  |
| HETATM | 37 | H  | 0 | 6.579  | 2.348  | 0.051  | H  |
| HETATM | 38 | H  | 0 | 7.502  | 0.955  | 0.636  | H  |
| HETATM | 39 | H  | 0 | 7.265  | 1.202  | -1.117 | H  |
| HETATM | 40 | C  | 0 | -1.818 | -2.191 | 2.566  | C  |
| HETATM | 41 | H  | 0 | -2.235 | -1.483 | 3.299  | H  |
| HETATM | 42 | H  | 0 | -2.080 | -3.213 | 2.907  | H  |
| HETATM | 43 | H  | 0 | -0.723 | -2.088 | 2.607  | H  |
| HETATM | 44 | C  | 0 | -1.440 | -2.612 | -2.460 | C  |
| HETATM | 45 | H  | 0 | -1.515 | -3.711 | -2.589 | H  |
| HETATM | 46 | H  | 0 | -1.840 | -2.144 | -3.373 | H  |
| HETATM | 47 | H  | 0 | -0.371 | -2.350 | -2.406 | H  |
| HETATM | 48 | C  | 0 | -5.740 | -1.075 | -0.363 | C  |
| HETATM | 49 | H  | 0 | -5.791 | 0.022  | -0.497 | H  |
| HETATM | 50 | H  | 0 | -6.232 | -1.523 | -1.243 | H  |
| HETATM | 51 | H  | 0 | -6.343 | -1.314 | 0.530  | H  |
| HETATM | 52 | H  | 0 | 2.590  | -3.565 | 0.979  | H  |
| HETATM | 53 | H  | 0 | 0.270  | -4.124 | 1.201  | H  |
| HETATM | 54 | C  | 0 | -1.642 | 3.090  | -0.209 | C  |
| HETATM | 55 | C  | 0 | 1.246  | 1.512  | -0.095 | C  |
| HETATM | 56 | F  | 0 | -3.296 | 1.784  | -1.182 | F  |
| HETATM | 57 | F  | 0 | -1.085 | 3.675  | 0.819  | F  |
| HETATM | 58 | F  | 0 | -1.162 | 3.499  | -1.351 | F  |
| HETATM | 59 | F  | 0 | 2.161  | 1.685  | 0.831  | F  |
| HETATM | 60 | F  | 0 | 1.535  | 2.373  | -1.052 | F  |
| HETATM | 61 | Cl | 0 | -3.497 | 1.946  | 1.372  | Cl |

END

### s5PA.pdb

|        |          |    |   |        |        |        |    |
|--------|----------|----|---|--------|--------|--------|----|
| TITLE  | s5PA.pdb |    |   |        |        |        |    |
| HETATM | 1        | Ru | 0 | 0.019  | 0.558  | -0.081 | Ru |
| HETATM | 2        | C  | 0 | -0.479 | -3.681 | 0.195  | C  |

|        |    |    |   |        |        |        |    |
|--------|----|----|---|--------|--------|--------|----|
| HETATM | 3  | C  | 0 | 1.042  | -3.593 | 0.021  | C  |
| HETATM | 4  | H  | 0 | -0.974 | -4.271 | -0.595 | H  |
| HETATM | 5  | H  | 0 | 1.397  | -4.047 | -0.923 | H  |
| HETATM | 6  | C  | 0 | 0.148  | -1.456 | 0.021  | C  |
| HETATM | 7  | N  | 0 | 1.292  | -2.146 | -0.000 | N  |
| HETATM | 8  | N  | 0 | -0.903 | -2.276 | 0.109  | N  |
| HETATM | 9  | Cl | 0 | -0.755 | 0.191  | -2.347 | Cl |
| HETATM | 10 | Cl | 0 | 0.932  | 0.671  | 2.148  | Cl |
| HETATM | 11 | C  | 0 | -1.414 | 1.892  | 0.203  | C  |
| HETATM | 12 | C  | 0 | 2.593  | -1.549 | -0.015 | C  |
| HETATM | 13 | C  | 0 | 3.325  | -1.476 | 1.189  | C  |
| HETATM | 14 | C  | 0 | 3.114  | -1.045 | -1.221 | C  |
| HETATM | 15 | C  | 0 | 4.557  | -0.821 | 1.174  | C  |
| HETATM | 16 | C  | 0 | 4.353  | -0.390 | -1.184 | C  |
| HETATM | 17 | C  | 0 | 5.076  | -0.255 | 0.003  | C  |
| HETATM | 18 | H  | 0 | 5.121  | -0.738 | 2.112  | H  |
| HETATM | 19 | H  | 0 | 4.765  | 0.012  | -2.119 | H  |
| HETATM | 20 | C  | 0 | -2.260 | -1.818 | 0.113  | C  |
| HETATM | 21 | C  | 0 | -2.795 | -1.275 | 1.299  | C  |
| HETATM | 22 | C  | 0 | -3.023 | -1.898 | -1.067 | C  |
| HETATM | 23 | C  | 0 | -4.077 | -0.720 | 1.252  | C  |
| HETATM | 24 | C  | 0 | -4.299 | -1.329 | -1.066 | C  |
| HETATM | 25 | C  | 0 | -4.829 | -0.712 | 0.073  | C  |
| HETATM | 26 | H  | 0 | -4.492 | -0.274 | 2.165  | H  |
| HETATM | 27 | H  | 0 | -4.888 | -1.353 | -1.992 | H  |
| HETATM | 28 | C  | 0 | 2.819  | -2.098 | 2.454  | C  |
| HETATM | 29 | H  | 0 | 3.187  | -1.552 | 3.338  | H  |
| HETATM | 30 | H  | 0 | 1.719  | -2.098 | 2.513  | H  |
| HETATM | 31 | H  | 0 | 3.167  | -3.146 | 2.555  | H  |
| HETATM | 32 | C  | 0 | 2.401  | -1.204 | -2.529 | C  |
| HETATM | 33 | H  | 0 | 1.711  | -2.065 | -2.538 | H  |
| HETATM | 34 | H  | 0 | 1.777  | -0.326 | -2.776 | H  |
| HETATM | 35 | H  | 0 | 3.125  | -1.334 | -3.351 | H  |
| HETATM | 36 | C  | 0 | 6.375  | 0.491  | 0.033  | C  |
| HETATM | 37 | H  | 0 | 6.234  | 1.517  | 0.421  | H  |
| HETATM | 38 | H  | 0 | 7.114  | 0.006  | 0.694  | H  |
| HETATM | 39 | H  | 0 | 6.821  | 0.584  | -0.971 | H  |
| HETATM | 40 | C  | 0 | -2.029 | -1.308 | 2.587  | C  |
| HETATM | 41 | H  | 0 | -2.674 | -1.017 | 3.432  | H  |
| HETATM | 42 | H  | 0 | -1.631 | -2.317 | 2.804  | H  |
| HETATM | 43 | H  | 0 | -1.160 | -0.622 | 2.592  | H  |
| HETATM | 44 | C  | 0 | -2.515 | -2.598 | -2.290 | C  |
| HETATM | 45 | H  | 0 | -2.844 | -3.656 | -2.307 | H  |
| HETATM | 46 | H  | 0 | -2.903 | -2.125 | -3.207 | H  |
| HETATM | 47 | H  | 0 | -1.416 | -2.578 | -2.362 | H  |
| HETATM | 48 | C  | 0 | -6.163 | -0.033 | 0.024  | C  |
| HETATM | 49 | H  | 0 | -6.046 | 1.043  | -0.209 | H  |
| HETATM | 50 | H  | 0 | -6.818 | -0.457 | -0.755 | H  |
| HETATM | 51 | H  | 0 | -6.693 | -0.090 | 0.990  | H  |
| HETATM | 52 | H  | 0 | 1.601  | -4.061 | 0.850  | H  |
| HETATM | 53 | H  | 0 | -0.782 | -4.106 | 1.170  | H  |
| HETATM | 54 | C  | 0 | -0.213 | 2.831  | -0.249 | C  |
| HETATM | 55 | C  | 0 | 1.159  | 2.042  | -0.662 | C  |
| HETATM | 56 | F  | 0 | -2.435 | 1.982  | -0.651 | F  |
| HETATM | 57 | F  | 0 | -0.610 | 3.508  | -1.338 | F  |
| HETATM | 58 | F  | 0 | 0.109  | 3.705  | 0.715  | F  |
| HETATM | 59 | F  | 0 | 1.464  | 2.250  | -1.940 | F  |
| HETATM | 60 | F  | 0 | 2.193  | 2.461  | 0.054  | F  |
| HETATM | 61 | Cl | 0 | -2.038 | 2.216  | 1.820  | Cl |

END

| TITLE  | s5c.pdb |    |   |        |        |        |    |
|--------|---------|----|---|--------|--------|--------|----|
| HETATM | 1       | Ru | 0 | 0.136  | 0.620  | -0.075 | Ru |
| HETATM | 2       | Cl | 0 | -0.541 | 0.212  | -2.372 | Cl |
| HETATM | 3       | Cl | 0 | 0.948  | 0.759  | 2.194  | Cl |
| HETATM | 4       | C  | 0 | -0.013 | -1.450 | 0.107  | C  |
| HETATM | 5       | N  | 0 | -1.128 | -2.192 | 0.122  | N  |
| HETATM | 6       | C  | 0 | -0.830 | -3.626 | 0.236  | C  |
| HETATM | 7       | C  | 0 | 0.696  | -3.670 | 0.116  | C  |
| HETATM | 8       | N  | 0 | 1.061  | -2.250 | 0.151  | N  |
| HETATM | 9       | C  | 0 | -2.449 | -1.650 | 0.101  | C  |
| HETATM | 10      | C  | 0 | -3.207 | -1.703 | -1.083 | C  |
| HETATM | 11      | C  | 0 | -4.466 | -1.093 | -1.090 | C  |
| HETATM | 12      | C  | 0 | -4.982 | -0.455 | 0.042  | C  |
| HETATM | 13      | C  | 0 | -4.226 | -0.465 | 1.221  | C  |
| HETATM | 14      | C  | 0 | -2.964 | -1.066 | 1.276  | C  |
| HETATM | 15      | C  | 0 | 2.393  | -1.733 | 0.092  | C  |
| HETATM | 16      | C  | 0 | 3.121  | -1.582 | 1.290  | C  |
| HETATM | 17      | C  | 0 | 4.363  | -0.948 | 1.233  | C  |
| HETATM | 18      | C  | 0 | 4.894  | -0.475 | 0.026  | C  |
| HETATM | 19      | C  | 0 | 4.185  | -0.707 | -1.155 | C  |
| HETATM | 20      | C  | 0 | 2.940  | -1.349 | -1.150 | C  |
| HETATM | 21      | C  | 0 | -2.711 | -2.415 | -2.304 | C  |
| HETATM | 22      | C  | 0 | -6.306 | 0.244  | -0.009 | C  |
| HETATM | 23      | C  | 0 | -2.191 | -1.101 | 2.559  | C  |
| HETATM | 24      | C  | 0 | 2.596  | -2.097 | 2.595  | C  |
| HETATM | 25      | C  | 0 | 6.179  | 0.294  | 0.009  | C  |
| HETATM | 26      | C  | 0 | 2.285  | -1.688 | -2.456 | C  |
| HETATM | 27      | H  | 0 | -1.347 | -4.188 | -0.561 | H  |
| HETATM | 28      | H  | 0 | -1.198 | -4.010 | 1.207  | H  |
| HETATM | 29      | H  | 0 | 1.043  | -4.122 | -0.834 | H  |
| HETATM | 30      | H  | 0 | 1.184  | -4.215 | 0.943  | H  |
| HETATM | 31      | H  | 0 | -5.054 | -1.110 | -2.017 | H  |
| HETATM | 32      | H  | 0 | -4.625 | 0.006  | 2.128  | H  |
| HETATM | 33      | H  | 0 | 4.920  | -0.791 | 2.166  | H  |
| HETATM | 34      | H  | 0 | 4.605  | -0.379 | -2.115 | H  |
| HETATM | 35      | H  | 0 | -3.090 | -1.939 | -3.223 | H  |
| HETATM | 36      | H  | 0 | -1.611 | -2.409 | -2.371 | H  |
| HETATM | 37      | H  | 0 | -3.055 | -3.469 | -2.320 | H  |
| HETATM | 38      | H  | 0 | -6.181 | 1.317  | -0.250 | H  |
| HETATM | 39      | H  | 0 | -6.968 | -0.180 | -0.783 | H  |
| HETATM | 40      | H  | 0 | -6.836 | 0.197  | 0.958  | H  |
| HETATM | 41      | H  | 0 | -1.254 | -0.510 | 2.520  | H  |
| HETATM | 42      | H  | 0 | -1.894 | -2.132 | 2.831  | H  |
| HETATM | 43      | H  | 0 | -2.792 | -0.699 | 3.391  | H  |
| HETATM | 44      | H  | 0 | 1.495  | -2.077 | 2.641  | H  |
| HETATM | 45      | H  | 0 | 2.963  | -1.490 | 3.438  | H  |
| HETATM | 46      | H  | 0 | 2.926  | -3.140 | 2.773  | H  |
| HETATM | 47      | H  | 0 | 5.993  | 1.370  | 0.193  | H  |
| HETATM | 48      | H  | 0 | 6.875  | -0.044 | 0.796  | H  |
| HETATM | 49      | H  | 0 | 6.694  | 0.221  | -0.964 | H  |
| HETATM | 50      | H  | 0 | 2.322  | -0.843 | -3.163 | H  |
| HETATM | 51      | H  | 0 | 2.817  | -2.533 | -2.936 | H  |
| HETATM | 52      | H  | 0 | 1.224  | -1.964 | -2.358 | H  |
| HETATM | 53      | C  | 0 | 1.502  | 2.036  | -0.752 | C  |
| HETATM | 54      | F  | 0 | 1.842  | 2.004  | -2.038 | F  |
| HETATM | 55      | F  | 0 | 2.606  | 2.104  | -0.008 | F  |
| HETATM | 56      | C  | 0 | 0.395  | 2.880  | -0.372 | C  |
| HETATM | 57      | C  | 0 | -1.369 | 1.711  | 0.178  | C  |
| HETATM | 58      | F  | 0 | -0.240 | 3.520  | -1.345 | F  |
| HETATM | 59      | F  | 0 | 0.534  | 3.645  | 0.697  | F  |
| HETATM | 60      | F  | 0 | -2.238 | 2.039  | -0.742 | F  |
| HETATM | 61      | Cl | 0 | -1.950 | 2.310  | 1.705  | Cl |



END

**s5d.pdb**

| TITLE  | s5d.pdb |   |        |        |        |    |
|--------|---------|---|--------|--------|--------|----|
| HETATM | 1 Ru    | 0 | -0.267 | 0.513  | 0.097  | Ru |
| HETATM | 2 C     | 0 | 0.099  | -3.633 | 0.019  | C  |
| HETATM | 3 C     | 0 | 1.589  | -3.340 | -0.133 | C  |
| HETATM | 4 H     | 0 | -0.308 | -4.245 | -0.806 | H  |
| HETATM | 5 H     | 0 | 1.987  | -3.634 | -1.124 | H  |
| HETATM | 6 C     | 0 | 0.445  | -1.307 | 0.037  | C  |
| HETATM | 7 N     | 0 | 1.669  | -1.882 | 0.018  | N  |
| HETATM | 8 N     | 0 | -0.486 | -2.298 | 0.008  | N  |
| HETATM | 9 Cl    | 0 | -0.774 | 0.760  | -2.221 | Cl |
| HETATM | 10 Cl   | 0 | -0.398 | 0.522  | 2.484  | Cl |
| HETATM | 11 C    | 0 | -2.699 | 2.277  | 0.414  | C  |
| HETATM | 12 C    | 0 | 2.934  | -1.229 | -0.046 | C  |
| HETATM | 13 C    | 0 | 3.706  | -1.140 | 1.128  | C  |
| HETATM | 14 C    | 0 | 3.400  | -0.718 | -1.269 | C  |
| HETATM | 15 C    | 0 | 4.962  | -0.535 | 1.056  | C  |
| HETATM | 16 C    | 0 | 4.656  | -0.099 | -1.293 | C  |
| HETATM | 17 C    | 0 | 5.449  | -0.003 | -0.146 | C  |
| HETATM | 18 H    | 0 | 5.568  | -0.457 | 1.968  | H  |
| HETATM | 19 H    | 0 | 5.025  | 0.311  | -2.243 | H  |
| HETATM | 20 C    | 0 | -1.887 | -2.030 | -0.081 | C  |
| HETATM | 21 C    | 0 | -2.658 | -1.891 | 1.095  | C  |
| HETATM | 22 C    | 0 | -2.488 | -1.946 | -1.357 | C  |
| HETATM | 23 C    | 0 | -4.002 | -1.523 | 0.965  | C  |
| HETATM | 24 C    | 0 | -3.836 | -1.591 | -1.434 | C  |
| HETATM | 25 C    | 0 | -4.598 | -1.342 | -0.287 | C  |
| HETATM | 26 H    | 0 | -4.601 | -1.385 | 1.876  | H  |
| HETATM | 27 H    | 0 | -4.300 | -1.493 | -2.424 | H  |
| HETATM | 28 C    | 0 | 3.140  | -1.599 | 2.436  | C  |
| HETATM | 29 H    | 0 | 3.867  | -1.471 | 3.256  | H  |
| HETATM | 30 H    | 0 | 2.232  | -1.021 | 2.696  | H  |
| HETATM | 31 H    | 0 | 2.839  | -2.663 | 2.424  | H  |
| HETATM | 32 C    | 0 | 2.565  | -0.800 | -2.510 | C  |
| HETATM | 33 H    | 0 | 2.108  | -1.798 | -2.643 | H  |
| HETATM | 34 H    | 0 | 1.722  | -0.081 | -2.492 | H  |
| HETATM | 35 H    | 0 | 3.165  | -0.582 | -3.409 | H  |
| HETATM | 36 C    | 0 | 6.782  | 0.682  | -0.188 | C  |
| HETATM | 37 H    | 0 | 6.720  | 1.705  | 0.229  | H  |
| HETATM | 38 H    | 0 | 7.539  | 0.146  | 0.411  | H  |
| HETATM | 39 H    | 0 | 7.165  | 0.777  | -1.217 | H  |
| HETATM | 40 C    | 0 | -2.109 | -2.232 | 2.446  | C  |
| HETATM | 41 H    | 0 | -2.498 | -1.553 | 3.222  | H  |
| HETATM | 42 H    | 0 | -2.414 | -3.261 | 2.726  | H  |
| HETATM | 43 H    | 0 | -1.011 | -2.174 | 2.493  | H  |
| HETATM | 44 C    | 0 | -1.739 | -2.300 | -2.604 | C  |
| HETATM | 45 H    | 0 | -1.903 | -3.366 | -2.862 | H  |
| HETATM | 46 H    | 0 | -2.085 | -1.699 | -3.460 | H  |
| HETATM | 47 H    | 0 | -0.654 | -2.138 | -2.515 | H  |
| HETATM | 48 C    | 0 | -6.015 | -0.870 | -0.399 | C  |
| HETATM | 49 H    | 0 | -6.054 | 0.233  | -0.476 | H  |
| HETATM | 50 H    | 0 | -6.513 | -1.266 | -1.300 | H  |
| HETATM | 51 H    | 0 | -6.617 | -1.150 | 0.481  | H  |
| HETATM | 52 H    | 0 | 2.212  | -3.841 | 0.629  | H  |
| HETATM | 53 H    | 0 | -0.144 | -4.150 | 0.969  | H  |
| HETATM | 54 C    | 0 | -1.707 | 3.164  | 0.220  | C  |
| HETATM | 55 C    | 0 | 1.282  | 1.450  | 0.128  | C  |
| HETATM | 56 F    | 0 | -3.431 | 1.815  | -0.568 | F  |
| HETATM | 57 F    | 0 | -3.114 | 1.905  | 1.597  | F  |

|        |    |    |   |        |       |        |    |
|--------|----|----|---|--------|-------|--------|----|
| HETATM | 58 | F  | 0 | -1.033 | 3.707 | 1.204  | F  |
| HETATM | 59 | F  | 0 | -1.440 | 3.675 | -0.951 | F  |
| HETATM | 60 | F  | 0 | 2.284  | 1.330 | 0.971  | F  |
| HETATM | 61 | Cl | 0 | 1.607  | 2.859 | -0.869 | Cl |

END

### a5a.pdb

| TITLE  | a5a.pdb |    |   |        |        |        |    |
|--------|---------|----|---|--------|--------|--------|----|
| HETATM | 1       | Ru | 0 | -0.282 | 0.419  | -0.032 | Ru |
| HETATM | 2       | C  | 0 | 0.316  | -3.675 | 0.338  | C  |
| HETATM | 3       | C  | 0 | 1.792  | -3.314 | 0.154  | C  |
| HETATM | 4       | H  | 0 | -0.055 | -4.374 | -0.434 | H  |
| HETATM | 5       | H  | 0 | 2.220  | -3.715 | -0.785 | H  |
| HETATM | 6       | C  | 0 | 0.533  | -1.344 | 0.110  | C  |
| HETATM | 7       | N  | 0 | 1.787  | -1.848 | 0.111  | N  |
| HETATM | 8       | N  | 0 | -0.341 | -2.380 | 0.220  | N  |
| HETATM | 9       | Cl | 0 | -0.696 | 0.433  | -2.388 | Cl |
| HETATM | 10      | Cl | 0 | -0.432 | 0.691  | 2.346  | Cl |
| HETATM | 11      | C  | 0 | -2.657 | 2.264  | -0.029 | C  |
| HETATM | 12      | C  | 0 | 3.008  | -1.122 | 0.007  | C  |
| HETATM | 13      | C  | 0 | 3.718  | -0.822 | 1.183  | C  |
| HETATM | 14      | C  | 0 | 3.499  | -0.757 | -1.259 | C  |
| HETATM | 15      | C  | 0 | 4.944  | -0.162 | 1.073  | C  |
| HETATM | 16      | C  | 0 | 4.723  | -0.079 | -1.325 | C  |
| HETATM | 17      | C  | 0 | 5.458  | 0.220  | -0.173 | C  |
| HETATM | 18      | H  | 0 | 5.503  | 0.079  | 1.986  | H  |
| HETATM | 19      | H  | 0 | 5.113  | 0.215  | -2.308 | H  |
| HETATM | 20      | C  | 0 | -1.750 | -2.162 | 0.131  | C  |
| HETATM | 21      | C  | 0 | -2.505 | -1.926 | 1.302  | C  |
| HETATM | 22      | C  | 0 | -2.370 | -2.188 | -1.139 | C  |
| HETATM | 23      | C  | 0 | -3.851 | -1.571 | 1.162  | C  |
| HETATM | 24      | C  | 0 | -3.718 | -1.833 | -1.228 | C  |
| HETATM | 25      | C  | 0 | -4.462 | -1.489 | -0.094 | C  |
| HETATM | 26      | H  | 0 | -4.436 | -1.354 | 2.065  | H  |
| HETATM | 27      | H  | 0 | -4.196 | -1.817 | -2.215 | H  |
| HETATM | 28      | C  | 0 | 3.116  | -1.124 | 2.520  | C  |
| HETATM | 29      | H  | 0 | 3.798  | -0.848 | 3.341  | H  |
| HETATM | 30      | H  | 0 | 2.172  | -0.559 | 2.658  | H  |
| HETATM | 31      | H  | 0 | 2.860  | -2.193 | 2.646  | H  |
| HETATM | 32      | C  | 0 | 2.721  | -1.063 | -2.502 | C  |
| HETATM | 33      | H  | 0 | 2.408  | -2.123 | -2.547 | H  |
| HETATM | 34      | H  | 0 | 1.789  | -0.467 | -2.565 | H  |
| HETATM | 35      | H  | 0 | 3.313  | -0.850 | -3.407 | H  |
| HETATM | 36      | C  | 0 | 6.754  | 0.967  | -0.264 | C  |
| HETATM | 37      | H  | 0 | 6.607  | 2.050  | -0.087 | H  |
| HETATM | 38      | H  | 0 | 7.483  | 0.623  | 0.489  | H  |
| HETATM | 39      | H  | 0 | 7.219  | 0.868  | -1.260 | H  |
| HETATM | 40      | C  | 0 | -1.929 | -2.149 | 2.666  | C  |
| HETATM | 41      | H  | 0 | -2.326 | -1.427 | 3.396  | H  |
| HETATM | 42      | H  | 0 | -2.197 | -3.163 | 3.025  | H  |
| HETATM | 43      | H  | 0 | -0.833 | -2.057 | 2.688  | H  |
| HETATM | 44      | C  | 0 | -1.636 | -2.659 | -2.356 | C  |
| HETATM | 45      | H  | 0 | -1.775 | -3.751 | -2.487 | H  |
| HETATM | 46      | H  | 0 | -2.012 | -2.167 | -3.267 | H  |
| HETATM | 47      | H  | 0 | -0.553 | -2.462 | -2.307 | H  |
| HETATM | 48      | C  | 0 | -5.881 | -1.027 | -0.222 | C  |
| HETATM | 49      | H  | 0 | -5.927 | 0.074  | -0.330 | H  |
| HETATM | 50      | H  | 0 | -6.378 | -1.452 | -1.110 | H  |
| HETATM | 51      | H  | 0 | -6.483 | -1.282 | 0.667  | H  |
| HETATM | 52      | H  | 0 | 2.432  | -3.671 | 0.981  | H  |
| HETATM | 53      | H  | 0 | 0.104  | -4.127 | 1.326  | H  |

|        |    |    |   |        |       |        |    |
|--------|----|----|---|--------|-------|--------|----|
| HETATM | 54 | C  | 0 | -1.623 | 3.103 | -0.254 | C  |
| HETATM | 55 | C  | 0 | 1.228  | 1.435 | -0.134 | C  |
| HETATM | 56 | F  | 0 | -3.365 | 1.750 | -1.001 | F  |
| HETATM | 57 | F  | 0 | -3.142 | 1.993 | 1.152  | F  |
| HETATM | 58 | F  | 0 | -1.312 | 3.443 | -1.490 | F  |
| HETATM | 59 | F  | 0 | 2.172  | 1.575 | 0.769  | F  |
| HETATM | 60 | F  | 0 | 1.508  | 2.299 | -1.089 | F  |
| HETATM | 61 | Cl | 0 | -0.807 | 3.959 | 0.975  | Cl |

END

### a5b.pdb

| TITLE  | a5b.pdb |    |   |        |        |        |    |
|--------|---------|----|---|--------|--------|--------|----|
| HETATM | 1       | Ru | 0 | -0.106 | 0.553  | -0.060 | Ru |
| HETATM | 2       | Cl | 0 | -0.988 | 0.141  | -2.292 | Cl |
| HETATM | 3       | Cl | 0 | 0.790  | 0.661  | 2.169  | Cl |
| HETATM | 4       | C  | 0 | 0.122  | -1.502 | 0.082  | C  |
| HETATM | 5       | N  | 0 | -0.915 | -2.337 | 0.221  | N  |
| HETATM | 6       | C  | 0 | -0.485 | -3.724 | 0.422  | C  |
| HETATM | 7       | C  | 0 | 1.031  | -3.638 | 0.216  | C  |
| HETATM | 8       | N  | 0 | 1.269  | -2.192 | 0.097  | N  |
| HETATM | 9       | C  | 0 | -2.264 | -1.862 | 0.243  | C  |
| HETATM | 10      | C  | 0 | -3.059 | -2.019 | -0.911 | C  |
| HETATM | 11      | C  | 0 | -4.310 | -1.405 | -0.941 | C  |
| HETATM | 12      | C  | 0 | -4.782 | -0.643 | 0.138  | C  |
| HETATM | 13      | C  | 0 | -4.006 | -0.569 | 1.294  | C  |
| HETATM | 14      | C  | 0 | -2.749 | -1.186 | 1.380  | C  |
| HETATM | 15      | C  | 0 | 2.567  | -1.600 | 0.002  | C  |
| HETATM | 16      | C  | 0 | 3.342  | -1.445 | 1.166  | C  |
| HETATM | 17      | C  | 0 | 4.578  | -0.800 | 1.057  | C  |
| HETATM | 18      | C  | 0 | 5.056  | -0.325 | -0.169 | C  |
| HETATM | 19      | C  | 0 | 4.285  | -0.540 | -1.317 | C  |
| HETATM | 20      | C  | 0 | 3.044  | -1.184 | -1.257 | C  |
| HETATM | 21      | C  | 0 | -2.577 | -2.820 | -2.081 | C  |
| HETATM | 22      | C  | 0 | -6.072 | 0.109  | 0.029  | C  |
| HETATM | 23      | C  | 0 | -2.015 | -1.161 | 2.687  | C  |
| HETATM | 24      | C  | 0 | 2.889  | -1.974 | 2.492  | C  |
| HETATM | 25      | C  | 0 | 6.357  | 0.413  | -0.248 | C  |
| HETATM | 26      | C  | 0 | 2.257  | -1.436 | -2.506 | C  |
| HETATM | 27      | H  | 0 | -0.984 | -4.394 | -0.300 | H  |
| HETATM | 28      | H  | 0 | -0.765 | -4.058 | 1.440  | H  |
| HETATM | 29      | H  | 0 | 1.373  | -4.152 | -0.701 | H  |
| HETATM | 30      | H  | 0 | 1.609  | -4.050 | 1.063  | H  |
| HETATM | 31      | H  | 0 | -4.918 | -1.487 | -1.850 | H  |
| HETATM | 32      | H  | 0 | -4.374 | -0.008 | 2.163  | H  |
| HETATM | 33      | H  | 0 | 5.179  | -0.653 | 1.964  | H  |
| HETATM | 34      | H  | 0 | 4.663  | -0.209 | -2.294 | H  |
| HETATM | 35      | H  | 0 | -3.067 | -2.494 | -3.013 | H  |
| HETATM | 36      | H  | 0 | -1.490 | -2.714 | -2.233 | H  |
| HETATM | 37      | H  | 0 | -2.802 | -3.898 | -1.955 | H  |
| HETATM | 38      | H  | 0 | -5.902 | 1.101  | -0.432 | H  |
| HETATM | 39      | H  | 0 | -6.533 | 0.290  | 1.015  | H  |
| HETATM | 40      | H  | 0 | -6.807 | -0.413 | -0.607 | H  |
| HETATM | 41      | H  | 0 | -1.773 | -0.134 | 3.008  | H  |
| HETATM | 42      | H  | 0 | -1.059 | -1.707 | 2.663  | H  |
| HETATM | 43      | H  | 0 | -2.644 | -1.607 | 3.480  | H  |
| HETATM | 44      | H  | 0 | 1.791  | -2.020 | 2.573  | H  |
| HETATM | 45      | H  | 0 | 3.244  | -1.333 | 3.316  | H  |
| HETATM | 46      | H  | 0 | 3.293  | -2.990 | 2.677  | H  |
| HETATM | 47      | H  | 0 | 6.209  | 1.498  | -0.086 | H  |
| HETATM | 48      | H  | 0 | 7.072  | 0.075  | 0.521  | H  |
| HETATM | 49      | H  | 0 | 6.836  | 0.303  | -1.236 | H  |

|        |    |    |   |        |        |        |    |
|--------|----|----|---|--------|--------|--------|----|
| HETATM | 50 | H  | 0 | 1.345  | -0.813 | -2.574 | H  |
| HETATM | 51 | H  | 0 | 2.865  | -1.233 | -3.403 | H  |
| HETATM | 52 | H  | 0 | 1.909  | -2.484 | -2.570 | H  |
| HETATM | 53 | C  | 0 | 1.212  | 1.704  | -0.764 | C  |
| HETATM | 54 | F  | 0 | 1.384  | 2.034  | -2.017 | F  |
| HETATM | 55 | F  | 0 | 2.240  | 2.164  | -0.101 | F  |
| HETATM | 56 | C  | 0 | -0.486 | 2.803  | -0.190 | C  |
| HETATM | 57 | C  | 0 | -1.593 | 1.944  | 0.230  | C  |
| HETATM | 58 | F  | 0 | -0.683 | 3.368  | -1.388 | F  |
| HETATM | 59 | Cl | 0 | 0.161  | 3.930  | 0.973  | Cl |
| HETATM | 60 | F  | 0 | -2.669 | 1.937  | -0.550 | F  |
| HETATM | 61 | F  | 0 | -1.994 | 2.017  | 1.502  | F  |

END

### a5NA.pdb

| TITLE  | a5NA.pdb |    |   |        |        |        |    |
|--------|----------|----|---|--------|--------|--------|----|
| HETATM | 1        | Ru | 0 | 0.026  | 0.493  | -0.048 | Ru |
| HETATM | 2        | C  | 0 | -0.900 | -3.662 | 0.361  | C  |
| HETATM | 3        | C  | 0 | 0.618  | -3.734 | 0.147  | C  |
| HETATM | 4        | H  | 0 | -1.471 | -4.249 | -0.379 | H  |
| HETATM | 5        | H  | 0 | 0.900  | -4.261 | -0.784 | H  |
| HETATM | 6        | C  | 0 | -0.067 | -1.522 | 0.073  | C  |
| HETATM | 7        | N  | 0 | 1.005  | -2.320 | 0.058  | N  |
| HETATM | 8        | N  | 0 | -1.190 | -2.232 | 0.203  | N  |
| HETATM | 9        | Cl | 0 | -0.848 | 0.170  | -2.289 | Cl |
| HETATM | 10       | Cl | 0 | 0.875  | 0.585  | 2.198  | Cl |
| HETATM | 11       | C  | 0 | -1.230 | 1.981  | 0.213  | C  |
| HETATM | 12       | C  | 0 | 2.346  | -1.825 | -0.016 | C  |
| HETATM | 13       | C  | 0 | 3.105  | -1.724 | 1.168  | C  |
| HETATM | 14       | C  | 0 | 2.869  | -1.419 | -1.260 | C  |
| HETATM | 15       | C  | 0 | 4.362  | -1.123 | 1.096  | C  |
| HETATM | 16       | C  | 0 | 4.136  | -0.823 | -1.281 | C  |
| HETATM | 17       | C  | 0 | 4.881  | -0.642 | -0.113 | C  |
| HETATM | 18       | H  | 0 | 4.946  | -1.008 | 2.018  | H  |
| HETATM | 19       | H  | 0 | 4.545  | -0.489 | -2.244 | H  |
| HETATM | 20       | C  | 0 | -2.498 | -1.650 | 0.222  | C  |
| HETATM | 21       | C  | 0 | -2.951 | -0.992 | 1.381  | C  |
| HETATM | 22       | C  | 0 | -3.299 | -1.730 | -0.937 | C  |
| HETATM | 23       | C  | 0 | -4.188 | -0.337 | 1.329  | C  |
| HETATM | 24       | C  | 0 | -4.527 | -1.069 | -0.938 | C  |
| HETATM | 25       | C  | 0 | -4.976 | -0.346 | 0.176  | C  |
| HETATM | 26       | H  | 0 | -4.542 | 0.191  | 2.224  | H  |
| HETATM | 27       | H  | 0 | -5.143 | -1.102 | -1.845 | H  |
| HETATM | 28       | C  | 0 | 2.597  | -2.263 | 2.470  | C  |
| HETATM | 29       | H  | 0 | 3.053  | -1.733 | 3.322  | H  |
| HETATM | 30       | H  | 0 | 1.505  | -2.152 | 2.570  | H  |
| HETATM | 31       | H  | 0 | 2.847  | -3.337 | 2.586  | H  |
| HETATM | 32       | C  | 0 | 2.116  | -1.612 | -2.540 | C  |
| HETATM | 33       | H  | 0 | 1.416  | -2.465 | -2.496 | H  |
| HETATM | 34       | H  | 0 | 1.494  | -0.735 | -2.798 | H  |
| HETATM | 35       | H  | 0 | 2.812  | -1.782 | -3.378 | H  |
| HETATM | 36       | C  | 0 | 6.195  | 0.075  | -0.147 | C  |
| HETATM | 37       | H  | 0 | 6.057  | 1.154  | 0.053  | H  |
| HETATM | 38       | H  | 0 | 6.893  | -0.301 | 0.621  | H  |
| HETATM | 39       | H  | 0 | 6.687  | -0.007 | -1.131 | H  |
| HETATM | 40       | C  | 0 | -2.170 | -0.985 | 2.660  | C  |
| HETATM | 41       | H  | 0 | -2.848 | -1.075 | 3.526  | H  |
| HETATM | 42       | H  | 0 | -1.430 | -1.801 | 2.718  | H  |
| HETATM | 43       | H  | 0 | -1.595 | -0.051 | 2.792  | H  |
| HETATM | 44       | C  | 0 | -2.865 | -2.518 | -2.135 | C  |
| HETATM | 45       | H  | 0 | -3.182 | -3.578 | -2.058 | H  |

|        |    |    |   |        |        |        |    |
|--------|----|----|---|--------|--------|--------|----|
| HETATM | 46 | H  | 0 | -3.314 | -2.115 | -3.057 | H  |
| HETATM | 47 | H  | 0 | -1.772 | -2.494 | -2.275 | H  |
| HETATM | 48 | C  | 0 | -6.271 | 0.405  | 0.119  | C  |
| HETATM | 49 | H  | 0 | -6.160 | 1.340  | -0.462 | H  |
| HETATM | 50 | H  | 0 | -7.065 | -0.179 | -0.379 | H  |
| HETATM | 51 | H  | 0 | -6.630 | 0.687  | 1.122  | H  |
| HETATM | 52 | H  | 0 | 1.151  | -4.220 | 0.982  | H  |
| HETATM | 53 | H  | 0 | -1.211 | -3.996 | 1.368  | H  |
| HETATM | 54 | C  | 0 | 0.082  | 2.772  | -0.298 | C  |
| HETATM | 55 | C  | 0 | 1.334  | 1.814  | -0.678 | C  |
| HETATM | 56 | F  | 0 | -2.263 | 2.218  | -0.583 | F  |
| HETATM | 57 | F  | 0 | -1.619 | 2.287  | 1.450  | F  |
| HETATM | 58 | F  | 0 | -0.274 | 3.393  | -1.440 | F  |
| HETATM | 59 | F  | 0 | 1.654  | 1.956  | -1.962 | F  |
| HETATM | 60 | F  | 0 | 2.438  | 2.052  | 0.018  | F  |
| HETATM | 61 | Cl | 0 | 0.595  | 3.972  | 0.909  | Cl |

END

### a5d.pdb

| TITLE  | a5d.pdb |    |   |        |        |        |    |
|--------|---------|----|---|--------|--------|--------|----|
| HETATM | 1       | Ru | 0 | -0.106 | 0.553  | -0.060 | Ru |
| HETATM | 2       | Cl | 0 | -0.988 | 0.141  | -2.292 | Cl |
| HETATM | 3       | Cl | 0 | 0.790  | 0.661  | 2.169  | Cl |
| HETATM | 4       | C  | 0 | 0.122  | -1.502 | 0.082  | C  |
| HETATM | 5       | N  | 0 | -0.915 | -2.337 | 0.221  | N  |
| HETATM | 6       | C  | 0 | -0.485 | -3.724 | 0.422  | C  |
| HETATM | 7       | C  | 0 | 1.031  | -3.638 | 0.216  | C  |
| HETATM | 8       | N  | 0 | 1.269  | -2.192 | 0.097  | N  |
| HETATM | 9       | C  | 0 | -2.264 | -1.862 | 0.243  | C  |
| HETATM | 10      | C  | 0 | -3.059 | -2.019 | -0.911 | C  |
| HETATM | 11      | C  | 0 | -4.310 | -1.405 | -0.941 | C  |
| HETATM | 12      | C  | 0 | -4.782 | -0.643 | 0.138  | C  |
| HETATM | 13      | C  | 0 | -4.006 | -0.569 | 1.294  | C  |
| HETATM | 14      | C  | 0 | -2.749 | -1.186 | 1.380  | C  |
| HETATM | 15      | C  | 0 | 2.567  | -1.600 | 0.002  | C  |
| HETATM | 16      | C  | 0 | 3.342  | -1.445 | 1.166  | C  |
| HETATM | 17      | C  | 0 | 4.578  | -0.800 | 1.057  | C  |
| HETATM | 18      | C  | 0 | 5.056  | -0.325 | -0.169 | C  |
| HETATM | 19      | C  | 0 | 4.285  | -0.540 | -1.317 | C  |
| HETATM | 20      | C  | 0 | 3.044  | -1.184 | -1.257 | C  |
| HETATM | 21      | C  | 0 | -2.577 | -2.820 | -2.081 | C  |
| HETATM | 22      | C  | 0 | -6.072 | 0.109  | 0.029  | C  |
| HETATM | 23      | C  | 0 | -2.015 | -1.161 | 2.687  | C  |
| HETATM | 24      | C  | 0 | 2.889  | -1.974 | 2.492  | C  |
| HETATM | 25      | C  | 0 | 6.357  | 0.413  | -0.248 | C  |
| HETATM | 26      | C  | 0 | 2.257  | -1.436 | -2.506 | C  |
| HETATM | 27      | H  | 0 | -0.984 | -4.394 | -0.300 | H  |
| HETATM | 28      | H  | 0 | -0.765 | -4.058 | 1.440  | H  |
| HETATM | 29      | H  | 0 | 1.373  | -4.152 | -0.701 | H  |
| HETATM | 30      | H  | 0 | 1.609  | -4.050 | 1.063  | H  |
| HETATM | 31      | H  | 0 | -4.918 | -1.487 | -1.850 | H  |
| HETATM | 32      | H  | 0 | -4.374 | -0.008 | 2.163  | H  |
| HETATM | 33      | H  | 0 | 5.179  | -0.653 | 1.964  | H  |
| HETATM | 34      | H  | 0 | 4.663  | -0.209 | -2.294 | H  |
| HETATM | 35      | H  | 0 | -3.067 | -2.494 | -3.013 | H  |
| HETATM | 36      | H  | 0 | -1.490 | -2.714 | -2.233 | H  |
| HETATM | 37      | H  | 0 | -2.802 | -3.898 | -1.955 | H  |
| HETATM | 38      | H  | 0 | -5.902 | 1.101  | -0.432 | H  |
| HETATM | 39      | H  | 0 | -6.533 | 0.290  | 1.015  | H  |
| HETATM | 40      | H  | 0 | -6.807 | -0.413 | -0.607 | H  |
| HETATM | 41      | H  | 0 | -1.773 | -0.134 | 3.008  | H  |

|        |    |    |   |        |        |        |    |
|--------|----|----|---|--------|--------|--------|----|
| HETATM | 42 | H  | 0 | -1.059 | -1.707 | 2.663  | H  |
| HETATM | 43 | H  | 0 | -2.644 | -1.607 | 3.480  | H  |
| HETATM | 44 | H  | 0 | 1.791  | -2.020 | 2.573  | H  |
| HETATM | 45 | H  | 0 | 3.244  | -1.333 | 3.316  | H  |
| HETATM | 46 | H  | 0 | 3.293  | -2.990 | 2.677  | H  |
| HETATM | 47 | H  | 0 | 6.209  | 1.498  | -0.086 | H  |
| HETATM | 48 | H  | 0 | 7.072  | 0.075  | 0.521  | H  |
| HETATM | 49 | H  | 0 | 6.836  | 0.303  | -1.236 | H  |
| HETATM | 50 | H  | 0 | 1.345  | -0.813 | -2.574 | H  |
| HETATM | 51 | H  | 0 | 2.865  | -1.233 | -3.403 | H  |
| HETATM | 52 | H  | 0 | 1.909  | -2.484 | -2.570 | H  |
| HETATM | 53 | C  | 0 | 1.212  | 1.704  | -0.764 | C  |
| HETATM | 54 | F  | 0 | 1.384  | 2.034  | -2.017 | F  |
| HETATM | 55 | F  | 0 | 2.240  | 2.164  | -0.101 | F  |
| HETATM | 56 | C  | 0 | -0.486 | 2.803  | -0.190 | C  |
| HETATM | 57 | C  | 0 | -1.593 | 1.944  | 0.230  | C  |
| HETATM | 58 | F  | 0 | -0.683 | 3.368  | -1.388 | F  |
| HETATM | 59 | Cl | 0 | 0.161  | 3.930  | 0.973  | Cl |
| HETATM | 60 | F  | 0 | -2.669 | 1.937  | -0.550 | F  |
| HETATM | 61 | F  | 0 | -1.994 | 2.017  | 1.502  | F  |

END

### sc5e.pdb

| TITLE  | sc5e.pdb |    |   |        |        |        |    |
|--------|----------|----|---|--------|--------|--------|----|
| HETATM | 1        | Ru | 0 | -0.171 | 0.481  | 0.078  | Ru |
| HETATM | 2        | C  | 0 | 0.243  | -3.646 | -0.332 | C  |
| HETATM | 3        | C  | 0 | 1.731  | -3.319 | -0.404 | C  |
| HETATM | 4        | H  | 0 | -0.126 | -4.196 | -1.217 | H  |
| HETATM | 5        | H  | 0 | 2.165  | -3.507 | -1.406 | H  |
| HETATM | 6        | C  | 0 | 0.545  | -1.328 | -0.086 | C  |
| HETATM | 7        | N  | 0 | 1.778  | -1.882 | -0.111 | N  |
| HETATM | 8        | N  | 0 | -0.367 | -2.322 | -0.260 | N  |
| HETATM | 9        | Cl | 0 | -0.613 | 0.738  | -2.251 | Cl |
| HETATM | 10       | Cl | 0 | -0.371 | 0.468  | 2.457  | Cl |
| HETATM | 11       | C  | 0 | -2.638 | 2.331  | 0.521  | C  |
| HETATM | 12       | C  | 0 | 3.035  | -1.212 | -0.088 | C  |
| HETATM | 13       | C  | 0 | 3.759  | -1.185 | 1.119  | C  |
| HETATM | 14       | C  | 0 | 3.542  | -0.630 | -1.262 | C  |
| HETATM | 15       | C  | 0 | 5.013  | -0.571 | 1.130  | C  |
| HETATM | 16       | C  | 0 | 4.796  | -0.009 | -1.203 | C  |
| HETATM | 17       | C  | 0 | 5.543  | 0.027  | -0.021 | C  |
| HETATM | 18       | H  | 0 | 5.583  | -0.541 | 2.068  | H  |
| HETATM | 19       | H  | 0 | 5.200  | 0.454  | -2.113 | H  |
| HETATM | 20       | C  | 0 | -1.777 | -2.111 | -0.156 | C  |
| HETATM | 21       | C  | 0 | -2.385 | -2.095 | 1.119  | C  |
| HETATM | 22       | C  | 0 | -2.552 | -1.998 | -1.331 | C  |
| HETATM | 23       | C  | 0 | -3.755 | -1.823 | 1.199  | C  |
| HETATM | 24       | C  | 0 | -3.922 | -1.751 | -1.200 | C  |
| HETATM | 25       | C  | 0 | -4.533 | -1.629 | 0.052  | C  |
| HETATM | 26       | H  | 0 | -4.228 | -1.783 | 2.188  | H  |
| HETATM | 27       | H  | 0 | -4.527 | -1.643 | -2.110 | H  |
| HETATM | 28       | C  | 0 | 3.143  | -1.718 | 2.375  | C  |
| HETATM | 29       | H  | 0 | 3.848  | -1.675 | 3.221  | H  |
| HETATM | 30       | H  | 0 | 2.247  | -1.126 | 2.651  | H  |
| HETATM | 31       | H  | 0 | 2.803  | -2.766 | 2.276  | H  |
| HETATM | 32       | C  | 0 | 2.749  | -0.626 | -2.532 | C  |
| HETATM | 33       | H  | 0 | 2.214  | -1.578 | -2.704 | H  |
| HETATM | 34       | H  | 0 | 1.963  | 0.154  | -2.522 | H  |
| HETATM | 35       | H  | 0 | 3.394  | -0.435 | -3.405 | H  |
| HETATM | 36       | C  | 0 | 6.871  | 0.720  | 0.027  | C  |
| HETATM | 37       | H  | 0 | 6.777  | 1.738  | 0.450  | H  |

|        |    |    |   |        |        |        |    |
|--------|----|----|---|--------|--------|--------|----|
| HETATM | 38 | H  | 0 | 7.594  | 0.182  | 0.665  | H  |
| HETATM | 39 | H  | 0 | 7.316  | 0.831  | -0.976 | H  |
| HETATM | 40 | C  | 0 | -1.637 | -2.486 | 2.358  | C  |
| HETATM | 41 | H  | 0 | -1.967 | -1.901 | 3.230  | H  |
| HETATM | 42 | H  | 0 | -1.826 | -3.555 | 2.586  | H  |
| HETATM | 43 | H  | 0 | -0.549 | -2.344 | 2.274  | H  |
| HETATM | 44 | C  | 0 | -1.960 | -2.214 | -2.690 | C  |
| HETATM | 45 | H  | 0 | -2.183 | -3.239 | -3.047 | H  |
| HETATM | 46 | H  | 0 | -2.382 | -1.512 | -3.427 | H  |
| HETATM | 47 | H  | 0 | -0.869 | -2.075 | -2.703 | H  |
| HETATM | 48 | C  | 0 | -5.986 | -1.286 | 0.164  | C  |
| HETATM | 49 | H  | 0 | -6.128 | -0.191 | 0.240  | H  |
| HETATM | 50 | H  | 0 | -6.560 | -1.621 | -0.717 | H  |
| HETATM | 51 | H  | 0 | -6.448 | -1.726 | 1.064  | H  |
| HETATM | 52 | H  | 0 | 2.340  | -3.881 | 0.326  | H  |
| HETATM | 53 | H  | 0 | -0.024 | -4.239 | 0.565  | H  |
| HETATM | 54 | C  | 0 | -1.614 | 3.173  | 0.271  | C  |
| HETATM | 55 | C  | 0 | 1.379  | 1.412  | 0.177  | C  |
| HETATM | 56 | F  | 0 | -2.970 | 2.023  | 1.758  | F  |
| HETATM | 57 | F  | 0 | -0.889 | 3.704  | 1.223  | F  |
| HETATM | 58 | F  | 0 | -1.341 | 3.647  | -0.913 | F  |
| HETATM | 59 | F  | 0 | 2.349  | 1.285  | 1.054  | F  |
| HETATM | 60 | Cl | 0 | 1.733  | 2.839  | -0.788 | Cl |
| HETATM | 61 | Cl | 0 | -3.681 | 1.741  | -0.691 | Cl |

END

### sc5f.pdb

|        |          |    |   |        |        |        |    |
|--------|----------|----|---|--------|--------|--------|----|
| TITLE  | sc5f.pdb |    |   |        |        |        |    |
| HETATM | 1        | Ru | 0 | -0.029 | 0.636  | -0.046 | Ru |
| HETATM | 2        | Cl | 0 | -0.815 | 0.196  | -2.310 | Cl |
| HETATM | 3        | Cl | 0 | 0.770  | 0.700  | 2.227  | Cl |
| HETATM | 4        | C  | 0 | -0.010 | -1.446 | 0.111  | C  |
| HETATM | 5        | N  | 0 | -1.099 | -2.220 | 0.224  | N  |
| HETATM | 6        | C  | 0 | -0.753 | -3.638 | 0.382  | C  |
| HETATM | 7        | C  | 0 | 0.770  | -3.639 | 0.242  | C  |
| HETATM | 8        | N  | 0 | 1.090  | -2.209 | 0.141  | N  |
| HETATM | 9        | C  | 0 | -2.445 | -1.743 | 0.132  | C  |
| HETATM | 10       | C  | 0 | -3.137 | -1.875 | -1.085 | C  |
| HETATM | 11       | C  | 0 | -4.418 | -1.321 | -1.180 | C  |
| HETATM | 12       | C  | 0 | -5.018 | -0.664 | -0.101 | C  |
| HETATM | 13       | C  | 0 | -4.328 | -0.605 | 1.115  | C  |
| HETATM | 14       | C  | 0 | -3.047 | -1.150 | 1.258  | C  |
| HETATM | 15       | C  | 0 | 2.431  | -1.716 | 0.058  | C  |
| HETATM | 16       | C  | 0 | 3.202  | -1.621 | 1.234  | C  |
| HETATM | 17       | C  | 0 | 4.496  | -1.106 | 1.137  | C  |
| HETATM | 18       | C  | 0 | 5.044  | -0.717 | -0.092 | C  |
| HETATM | 19       | C  | 0 | 4.280  | -0.887 | -1.249 | C  |
| HETATM | 20       | C  | 0 | 2.973  | -1.385 | -1.201 | C  |
| HETATM | 21       | C  | 0 | -2.556 | -2.614 | -2.251 | C  |
| HETATM | 22       | C  | 0 | -6.364 | -0.022 | -0.247 | C  |
| HETATM | 23       | C  | 0 | -2.354 | -1.137 | 2.587  | C  |
| HETATM | 24       | C  | 0 | 2.676  | -2.089 | 2.556  | C  |
| HETATM | 25       | C  | 0 | 6.408  | -0.103 | -0.159 | C  |
| HETATM | 26       | C  | 0 | 2.194  | -1.560 | -2.467 | C  |
| HETATM | 27       | H  | 0 | -1.261 | -4.241 | -0.391 | H  |
| HETATM | 28       | H  | 0 | -1.099 | -4.002 | 1.368  | H  |
| HETATM | 29       | H  | 0 | 1.125  | -4.167 | -0.663 | H  |
| HETATM | 30       | H  | 0 | 1.287  | -4.083 | 1.110  | H  |
| HETATM | 31       | H  | 0 | -4.956 | -1.395 | -2.134 | H  |
| HETATM | 32       | H  | 0 | -4.797 | -0.125 | 1.984  | H  |
| HETATM | 33       | H  | 0 | 5.093  | -1.001 | 2.052  | H  |

|        |    |    |   |        |        |        |    |
|--------|----|----|---|--------|--------|--------|----|
| HETATM | 34 | H  | 0 | 4.706  | -0.619 | -2.225 | H  |
| HETATM | 35 | H  | 0 | -2.888 | -2.172 | -3.205 | H  |
| HETATM | 36 | H  | 0 | -1.455 | -2.595 | -2.257 | H  |
| HETATM | 37 | H  | 0 | -2.884 | -3.673 | -2.255 | H  |
| HETATM | 38 | H  | 0 | -6.941 | -0.052 | 0.693  | H  |
| HETATM | 39 | H  | 0 | -6.967 | -0.501 | -1.036 | H  |
| HETATM | 40 | H  | 0 | -6.267 | 1.045  | -0.524 | H  |
| HETATM | 41 | H  | 0 | -1.401 | -0.576 | 2.576  | H  |
| HETATM | 42 | H  | 0 | -2.106 | -2.162 | 2.923  | H  |
| HETATM | 43 | H  | 0 | -2.994 | -0.681 | 3.360  | H  |
| HETATM | 44 | H  | 0 | 1.582  | -1.976 | 2.635  | H  |
| HETATM | 45 | H  | 0 | 3.120  | -1.515 | 3.385  | H  |
| HETATM | 46 | H  | 0 | 2.926  | -3.155 | 2.732  | H  |
| HETATM | 47 | H  | 0 | 6.355  | 0.992  | -0.002 | H  |
| HETATM | 48 | H  | 0 | 6.885  | -0.258 | -1.142 | H  |
| HETATM | 49 | H  | 0 | 7.083  | -0.500 | 0.618  | H  |
| HETATM | 50 | H  | 0 | 1.556  | -0.684 | -2.692 | H  |
| HETATM | 51 | H  | 0 | 2.870  | -1.705 | -3.326 | H  |
| HETATM | 52 | H  | 0 | 1.502  | -2.419 | -2.424 | H  |
| HETATM | 53 | C  | 0 | -1.530 | 1.741  | 0.211  | C  |
| HETATM | 54 | F  | 0 | -2.407 | 2.082  | -0.697 | F  |
| HETATM | 55 | Cl | 0 | -2.122 | 2.268  | 1.761  | Cl |
| HETATM | 56 | C  | 0 | 0.185  | 2.888  | -0.296 | C  |
| HETATM | 57 | C  | 0 | 1.255  | 2.047  | -0.817 | C  |
| HETATM | 58 | F  | 0 | -0.460 | 3.605  | -1.212 | F  |
| HETATM | 59 | F  | 0 | 0.396  | 3.609  | 0.793  | F  |
| HETATM | 60 | F  | 0 | 1.427  | 2.109  | -2.143 | F  |
| HETATM | 61 | Cl | 0 | 2.809  | 2.058  | -0.010 | Cl |

END

### sc5NB.pdb

| TITLE  | sc5NB.pdb |    |   |        |        |        |    |
|--------|-----------|----|---|--------|--------|--------|----|
| HETATM | 1         | Ru | 0 | -0.006 | 0.518  | -0.037 | Ru |
| HETATM | 2         | C  | 0 | -0.825 | -3.644 | 0.489  | C  |
| HETATM | 3         | C  | 0 | 0.680  | -3.686 | 0.208  | C  |
| HETATM | 4         | H  | 0 | -1.415 | -4.268 | -0.204 | H  |
| HETATM | 5         | H  | 0 | 0.932  | -4.194 | -0.743 | H  |
| HETATM | 6         | C  | 0 | -0.054 | -1.492 | 0.127  | C  |
| HETATM | 7         | N  | 0 | 1.037  | -2.263 | 0.116  | N  |
| HETATM | 8         | N  | 0 | -1.158 | -2.226 | 0.296  | N  |
| HETATM | 9         | Cl | 0 | -0.824 | 0.092  | -2.284 | Cl |
| HETATM | 10        | Cl | 0 | 0.801  | 0.610  | 2.227  | Cl |
| HETATM | 11        | C  | 0 | -1.300 | 1.992  | 0.131  | C  |
| HETATM | 12        | C  | 0 | 2.377  | -1.765 | 0.018  | C  |
| HETATM | 13        | C  | 0 | 3.160  | -1.685 | 1.189  | C  |
| HETATM | 14        | C  | 0 | 2.895  | -1.382 | -1.235 | C  |
| HETATM | 15        | C  | 0 | 4.436  | -1.128 | 1.095  | C  |
| HETATM | 16        | C  | 0 | 4.181  | -0.830 | -1.278 | C  |
| HETATM | 17        | C  | 0 | 4.952  | -0.672 | -0.125 | C  |
| HETATM | 18        | H  | 0 | 5.039  | -1.032 | 2.007  | H  |
| HETATM | 19        | H  | 0 | 4.585  | -0.512 | -2.248 | H  |
| HETATM | 20        | C  | 0 | -2.490 | -1.705 | 0.195  | C  |
| HETATM | 21        | C  | 0 | -3.063 | -1.040 | 1.296  | C  |
| HETATM | 22        | C  | 0 | -3.189 | -1.860 | -1.016 | C  |
| HETATM | 23        | C  | 0 | -4.317 | -0.441 | 1.125  | C  |
| HETATM | 24        | C  | 0 | -4.444 | -1.257 | -1.136 | C  |
| HETATM | 25        | C  | 0 | -5.008 | -0.521 | -0.088 | C  |
| HETATM | 26        | H  | 0 | -4.764 | 0.097  | 1.970  | H  |
| HETATM | 27        | H  | 0 | -4.985 | -1.349 | -2.086 | H  |
| HETATM | 28        | C  | 0 | 2.661  | -2.206 | 2.502  | C  |
| HETATM | 29        | H  | 0 | 3.131  | -1.672 | 3.344  | H  |



|        |    |    |   |        |        |        |    |
|--------|----|----|---|--------|--------|--------|----|
| HETATM | 30 | H  | 0 | 1.571  | -2.085 | 2.614  | H  |
| HETATM | 31 | H  | 0 | 2.904  | -3.280 | 2.627  | H  |
| HETATM | 32 | C  | 0 | 2.133  | -1.560 | -2.512 | C  |
| HETATM | 33 | H  | 0 | 1.308  | -2.285 | -2.424 | H  |
| HETATM | 34 | H  | 0 | 1.666  | -0.618 | -2.850 | H  |
| HETATM | 35 | H  | 0 | 2.807  | -1.900 | -3.318 | H  |
| HETATM | 36 | C  | 0 | 6.285  | 0.007  | -0.185 | C  |
| HETATM | 37 | H  | 0 | 6.171  | 1.100  | -0.049 | H  |
| HETATM | 38 | H  | 0 | 6.969  | -0.342 | 0.607  | H  |
| HETATM | 39 | H  | 0 | 6.781  | -0.137 | -1.160 | H  |
| HETATM | 40 | C  | 0 | -2.381 | -1.011 | 2.629  | C  |
| HETATM | 41 | H  | 0 | -3.029 | -0.548 | 3.391  | H  |
| HETATM | 42 | H  | 0 | -2.131 | -2.031 | 2.979  | H  |
| HETATM | 43 | H  | 0 | -1.431 | -0.444 | 2.622  | H  |
| HETATM | 44 | C  | 0 | -2.638 | -2.671 | -2.149 | C  |
| HETATM | 45 | H  | 0 | -2.990 | -3.721 | -2.098 | H  |
| HETATM | 46 | H  | 0 | -2.969 | -2.269 | -3.120 | H  |
| HETATM | 47 | H  | 0 | -1.536 | -2.678 | -2.168 | H  |
| HETATM | 48 | C  | 0 | -6.320 | 0.180  | -0.269 | C  |
| HETATM | 49 | H  | 0 | -6.172 | 1.187  | -0.704 | H  |
| HETATM | 50 | H  | 0 | -6.990 | -0.365 | -0.955 | H  |
| HETATM | 51 | H  | 0 | -6.849 | 0.322  | 0.689  | H  |
| HETATM | 52 | H  | 0 | 1.259  | -4.171 | 1.012  | H  |
| HETATM | 53 | H  | 0 | -1.081 | -3.950 | 1.520  | H  |
| HETATM | 54 | C  | 0 | 0.035  | 2.793  | -0.317 | C  |
| HETATM | 55 | C  | 0 | 1.273  | 1.843  | -0.733 | C  |
| HETATM | 56 | F  | 0 | -2.269 | 2.165  | -0.763 | F  |
| HETATM | 57 | F  | 0 | -0.296 | 3.500  | -1.410 | F  |
| HETATM | 58 | F  | 0 | 0.410  | 3.641  | 0.649  | F  |
| HETATM | 59 | F  | 0 | 1.511  | 1.942  | -2.045 | F  |
| HETATM | 60 | Cl | 0 | 2.780  | 2.176  | 0.109  | Cl |
| HETATM | 61 | Cl | 0 | -1.941 | 2.473  | 1.702  | Cl |

END

### sc5g.pdb

|        |          |    |   |        |        |        |    |
|--------|----------|----|---|--------|--------|--------|----|
| TITLE  | sc5g.pdb |    |   |        |        |        |    |
| HETATM | 1        | Ru | 0 | -0.029 | 0.636  | -0.046 | Ru |
| HETATM | 2        | Cl | 0 | -0.815 | 0.196  | -2.310 | Cl |
| HETATM | 3        | Cl | 0 | 0.770  | 0.700  | 2.227  | Cl |
| HETATM | 4        | C  | 0 | -0.010 | -1.446 | 0.111  | C  |
| HETATM | 5        | N  | 0 | -1.099 | -2.220 | 0.224  | N  |
| HETATM | 6        | C  | 0 | -0.753 | -3.638 | 0.382  | C  |
| HETATM | 7        | C  | 0 | 0.770  | -3.639 | 0.242  | C  |
| HETATM | 8        | N  | 0 | 1.090  | -2.209 | 0.141  | N  |
| HETATM | 9        | C  | 0 | -2.445 | -1.743 | 0.132  | C  |
| HETATM | 10       | C  | 0 | -3.137 | -1.875 | -1.085 | C  |
| HETATM | 11       | C  | 0 | -4.418 | -1.321 | -1.180 | C  |
| HETATM | 12       | C  | 0 | -5.018 | -0.664 | -0.101 | C  |
| HETATM | 13       | C  | 0 | -4.328 | -0.605 | 1.115  | C  |
| HETATM | 14       | C  | 0 | -3.047 | -1.150 | 1.258  | C  |
| HETATM | 15       | C  | 0 | 2.431  | -1.716 | 0.058  | C  |
| HETATM | 16       | C  | 0 | 3.202  | -1.621 | 1.234  | C  |
| HETATM | 17       | C  | 0 | 4.496  | -1.106 | 1.137  | C  |
| HETATM | 18       | C  | 0 | 5.044  | -0.717 | -0.092 | C  |
| HETATM | 19       | C  | 0 | 4.280  | -0.887 | -1.249 | C  |
| HETATM | 20       | C  | 0 | 2.973  | -1.385 | -1.201 | C  |
| HETATM | 21       | C  | 0 | -2.556 | -2.614 | -2.251 | C  |
| HETATM | 22       | C  | 0 | -6.364 | -0.022 | -0.247 | C  |
| HETATM | 23       | C  | 0 | -2.354 | -1.137 | 2.587  | C  |
| HETATM | 24       | C  | 0 | 2.676  | -2.089 | 2.556  | C  |
| HETATM | 25       | C  | 0 | 6.408  | -0.103 | -0.159 | C  |

|        |    |    |   |        |        |        |    |
|--------|----|----|---|--------|--------|--------|----|
| HETATM | 26 | C  | 0 | 2.194  | -1.560 | -2.467 | C  |
| HETATM | 27 | H  | 0 | -1.261 | -4.241 | -0.391 | H  |
| HETATM | 28 | H  | 0 | -1.099 | -4.002 | 1.368  | H  |
| HETATM | 29 | H  | 0 | 1.125  | -4.167 | -0.663 | H  |
| HETATM | 30 | H  | 0 | 1.287  | -4.083 | 1.110  | H  |
| HETATM | 31 | H  | 0 | -4.956 | -1.395 | -2.134 | H  |
| HETATM | 32 | H  | 0 | -4.797 | -0.125 | 1.984  | H  |
| HETATM | 33 | H  | 0 | 5.093  | -1.001 | 2.052  | H  |
| HETATM | 34 | H  | 0 | 4.706  | -0.619 | -2.225 | H  |
| HETATM | 35 | H  | 0 | -2.888 | -2.172 | -3.205 | H  |
| HETATM | 36 | H  | 0 | -1.455 | -2.595 | -2.257 | H  |
| HETATM | 37 | H  | 0 | -2.884 | -3.673 | -2.255 | H  |
| HETATM | 38 | H  | 0 | -6.941 | -0.052 | 0.693  | H  |
| HETATM | 39 | H  | 0 | -6.967 | -0.501 | -1.036 | H  |
| HETATM | 40 | H  | 0 | -6.267 | 1.045  | -0.524 | H  |
| HETATM | 41 | H  | 0 | -1.401 | -0.576 | 2.576  | H  |
| HETATM | 42 | H  | 0 | -2.106 | -2.162 | 2.923  | H  |
| HETATM | 43 | H  | 0 | -2.994 | -0.681 | 3.360  | H  |
| HETATM | 44 | H  | 0 | 1.582  | -1.976 | 2.635  | H  |
| HETATM | 45 | H  | 0 | 3.120  | -1.515 | 3.385  | H  |
| HETATM | 46 | H  | 0 | 2.926  | -3.155 | 2.732  | H  |
| HETATM | 47 | H  | 0 | 6.355  | 0.992  | -0.002 | H  |
| HETATM | 48 | H  | 0 | 6.885  | -0.258 | -1.142 | H  |
| HETATM | 49 | H  | 0 | 7.083  | -0.500 | 0.618  | H  |
| HETATM | 50 | H  | 0 | 1.556  | -0.684 | -2.692 | H  |
| HETATM | 51 | H  | 0 | 2.870  | -1.705 | -3.326 | H  |
| HETATM | 52 | H  | 0 | 1.502  | -2.419 | -2.424 | H  |
| HETATM | 53 | C  | 0 | -1.530 | 1.741  | 0.211  | C  |
| HETATM | 54 | F  | 0 | -2.407 | 2.082  | -0.697 | F  |
| HETATM | 55 | Cl | 0 | -2.122 | 2.268  | 1.761  | Cl |
| HETATM | 56 | C  | 0 | 0.185  | 2.888  | -0.296 | C  |
| HETATM | 57 | C  | 0 | 1.255  | 2.047  | -0.817 | C  |
| HETATM | 58 | F  | 0 | -0.460 | 3.605  | -1.212 | F  |
| HETATM | 59 | F  | 0 | 0.396  | 3.609  | 0.793  | F  |
| HETATM | 60 | F  | 0 | 1.427  | 2.109  | -2.143 | F  |
| HETATM | 61 | Cl | 0 | 2.809  | 2.058  | -0.010 | Cl |

END

### sc5h.pdb

|        |          |    |   |        |        |        |    |
|--------|----------|----|---|--------|--------|--------|----|
| TITLE  | sc5h.pdb |    |   |        |        |        |    |
| HETATM | 1        | Ru | 0 | -0.171 | 0.481  | 0.078  | Ru |
| HETATM | 2        | C  | 0 | 0.243  | -3.646 | -0.332 | C  |
| HETATM | 3        | C  | 0 | 1.731  | -3.319 | -0.404 | C  |
| HETATM | 4        | H  | 0 | -0.126 | -4.196 | -1.217 | H  |
| HETATM | 5        | H  | 0 | 2.165  | -3.507 | -1.406 | H  |
| HETATM | 6        | C  | 0 | 0.545  | -1.328 | -0.086 | C  |
| HETATM | 7        | N  | 0 | 1.778  | -1.882 | -0.111 | N  |
| HETATM | 8        | N  | 0 | -0.367 | -2.322 | -0.260 | N  |
| HETATM | 9        | Cl | 0 | -0.613 | 0.738  | -2.251 | Cl |
| HETATM | 10       | Cl | 0 | -0.371 | 0.468  | 2.457  | Cl |
| HETATM | 11       | C  | 0 | -2.638 | 2.331  | 0.521  | C  |
| HETATM | 12       | C  | 0 | 3.035  | -1.212 | -0.088 | C  |
| HETATM | 13       | C  | 0 | 3.759  | -1.185 | 1.119  | C  |
| HETATM | 14       | C  | 0 | 3.542  | -0.630 | -1.262 | C  |
| HETATM | 15       | C  | 0 | 5.013  | -0.571 | 1.130  | C  |
| HETATM | 16       | C  | 0 | 4.796  | -0.009 | -1.203 | C  |
| HETATM | 17       | C  | 0 | 5.543  | 0.027  | -0.021 | C  |
| HETATM | 18       | H  | 0 | 5.583  | -0.541 | 2.068  | H  |
| HETATM | 19       | H  | 0 | 5.200  | 0.454  | -2.113 | H  |
| HETATM | 20       | C  | 0 | -1.777 | -2.111 | -0.156 | C  |
| HETATM | 21       | C  | 0 | -2.385 | -2.095 | 1.119  | C  |

|        |    |    |   |        |        |        |    |
|--------|----|----|---|--------|--------|--------|----|
| HETATM | 22 | C  | 0 | -2.552 | -1.998 | -1.331 | C  |
| HETATM | 23 | C  | 0 | -3.755 | -1.823 | 1.199  | C  |
| HETATM | 24 | C  | 0 | -3.922 | -1.751 | -1.200 | C  |
| HETATM | 25 | C  | 0 | -4.533 | -1.629 | 0.052  | C  |
| HETATM | 26 | H  | 0 | -4.228 | -1.783 | 2.188  | H  |
| HETATM | 27 | H  | 0 | -4.527 | -1.643 | -2.110 | H  |
| HETATM | 28 | C  | 0 | 3.143  | -1.718 | 2.375  | C  |
| HETATM | 29 | H  | 0 | 3.848  | -1.675 | 3.221  | H  |
| HETATM | 30 | H  | 0 | 2.247  | -1.126 | 2.651  | H  |
| HETATM | 31 | H  | 0 | 2.803  | -2.766 | 2.276  | H  |
| HETATM | 32 | C  | 0 | 2.749  | -0.626 | -2.532 | C  |
| HETATM | 33 | H  | 0 | 2.214  | -1.578 | -2.704 | H  |
| HETATM | 34 | H  | 0 | 1.963  | 0.154  | -2.522 | H  |
| HETATM | 35 | H  | 0 | 3.394  | -0.435 | -3.405 | H  |
| HETATM | 36 | C  | 0 | 6.871  | 0.720  | 0.027  | C  |
| HETATM | 37 | H  | 0 | 6.777  | 1.738  | 0.450  | H  |
| HETATM | 38 | H  | 0 | 7.594  | 0.182  | 0.665  | H  |
| HETATM | 39 | H  | 0 | 7.316  | 0.831  | -0.976 | H  |
| HETATM | 40 | C  | 0 | -1.637 | -2.486 | 2.358  | C  |
| HETATM | 41 | H  | 0 | -1.967 | -1.901 | 3.230  | H  |
| HETATM | 42 | H  | 0 | -1.826 | -3.555 | 2.586  | H  |
| HETATM | 43 | H  | 0 | -0.549 | -2.344 | 2.274  | H  |
| HETATM | 44 | C  | 0 | -1.960 | -2.214 | -2.690 | C  |
| HETATM | 45 | H  | 0 | -2.183 | -3.239 | -3.047 | H  |
| HETATM | 46 | H  | 0 | -2.382 | -1.512 | -3.427 | H  |
| HETATM | 47 | H  | 0 | -0.869 | -2.075 | -2.703 | H  |
| HETATM | 48 | C  | 0 | -5.986 | -1.286 | 0.164  | C  |
| HETATM | 49 | H  | 0 | -6.128 | -0.191 | 0.240  | H  |
| HETATM | 50 | H  | 0 | -6.560 | -1.621 | -0.717 | H  |
| HETATM | 51 | H  | 0 | -6.448 | -1.726 | 1.064  | H  |
| HETATM | 52 | H  | 0 | 2.340  | -3.881 | 0.326  | H  |
| HETATM | 53 | H  | 0 | -0.024 | -4.239 | 0.565  | H  |
| HETATM | 54 | C  | 0 | -1.614 | 3.173  | 0.271  | C  |
| HETATM | 55 | C  | 0 | 1.379  | 1.412  | 0.177  | C  |
| HETATM | 56 | F  | 0 | -2.970 | 2.023  | 1.758  | F  |
| HETATM | 57 | F  | 0 | -0.889 | 3.704  | 1.223  | F  |
| HETATM | 58 | F  | 0 | -1.341 | 3.647  | -0.913 | F  |
| HETATM | 59 | F  | 0 | 2.349  | 1.285  | 1.054  | F  |
| HETATM | 60 | Cl | 0 | 1.733  | 2.839  | -0.788 | Cl |
| HETATM | 61 | Cl | 0 | -3.681 | 1.741  | -0.691 | Cl |

END

## st5e.pdb

|        |          |    |   |        |        |        |    |
|--------|----------|----|---|--------|--------|--------|----|
| TITLE  | st5e.pdb |    |   |        |        |        |    |
| HETATM | 1        | Ru | 0 | -0.152 | 0.454  | 0.002  | Ru |
| HETATM | 2        | C  | 0 | 0.450  | -3.656 | 0.156  | C  |
| HETATM | 3        | C  | 0 | 1.928  | -3.281 | 0.064  | C  |
| HETATM | 4        | H  | 0 | 0.124  | -4.329 | -0.658 | H  |
| HETATM | 5        | H  | 0 | 2.399  | -3.611 | -0.882 | H  |
| HETATM | 6        | C  | 0 | 0.660  | -1.315 | 0.066  | C  |
| HETATM | 7        | N  | 0 | 1.915  | -1.815 | 0.122  | N  |
| HETATM | 8        | N  | 0 | -0.212 | -2.361 | 0.051  | N  |
| HETATM | 9        | Cl | 0 | -0.625 | 0.563  | -2.327 | Cl |
| HETATM | 10       | Cl | 0 | -0.340 | 0.609  | 2.378  | Cl |
| HETATM | 11       | C  | 0 | -3.004 | 2.061  | 0.130  | C  |
| HETATM | 12       | C  | 0 | 3.142  | -1.092 | 0.063  | C  |
| HETATM | 13       | C  | 0 | 3.854  | -0.876 | 1.256  | C  |
| HETATM | 14       | C  | 0 | 3.629  | -0.640 | -1.175 | C  |
| HETATM | 15       | C  | 0 | 5.079  | -0.209 | 1.190  | C  |
| HETATM | 16       | C  | 0 | 4.853  | 0.042  | -1.195 | C  |
| HETATM | 17       | C  | 0 | 5.590  | 0.261  | -0.027 | C  |

|        |    |    |   |        |        |        |    |
|--------|----|----|---|--------|--------|--------|----|
| HETATM | 18 | H  | 0 | 5.638  | -0.029 | 2.117  | H  |
| HETATM | 19 | H  | 0 | 5.242  | 0.402  | -2.157 | H  |
| HETATM | 20 | C  | 0 | -1.623 | -2.180 | -0.076 | C  |
| HETATM | 21 | C  | 0 | -2.424 | -2.023 | 1.076  | C  |
| HETATM | 22 | C  | 0 | -2.204 | -2.200 | -1.365 | C  |
| HETATM | 23 | C  | 0 | -3.785 | -1.752 | 0.904  | C  |
| HETATM | 24 | C  | 0 | -3.568 | -1.927 | -1.485 | C  |
| HETATM | 25 | C  | 0 | -4.366 | -1.667 | -0.365 | C  |
| HETATM | 26 | H  | 0 | -4.408 | -1.599 | 1.795  | H  |
| HETATM | 27 | H  | 0 | -4.016 | -1.904 | -2.486 | H  |
| HETATM | 28 | C  | 0 | 3.250  | -1.261 | 2.571  | C  |
| HETATM | 29 | H  | 0 | 3.922  | -1.017 | 3.410  | H  |
| HETATM | 30 | H  | 0 | 2.296  | -0.721 | 2.732  | H  |
| HETATM | 31 | H  | 0 | 3.014  | -2.339 | 2.638  | H  |
| HETATM | 32 | C  | 0 | 2.847  | -0.848 | -2.435 | C  |
| HETATM | 33 | H  | 0 | 2.456  | -1.879 | -2.521 | H  |
| HETATM | 34 | H  | 0 | 1.961  | -0.184 | -2.488 | H  |
| HETATM | 35 | H  | 0 | 3.464  | -0.647 | -3.325 | H  |
| HETATM | 36 | C  | 0 | 6.882  | 1.019  | -0.069 | C  |
| HETATM | 37 | H  | 0 | 6.721  | 2.098  | 0.118  | H  |
| HETATM | 38 | H  | 0 | 7.591  | 0.669  | 0.701  | H  |
| HETATM | 39 | H  | 0 | 7.377  | 0.938  | -1.052 | H  |
| HETATM | 40 | C  | 0 | -1.887 | -2.239 | 2.457  | C  |
| HETATM | 41 | H  | 0 | -2.309 | -1.512 | 3.169  | H  |
| HETATM | 42 | H  | 0 | -2.167 | -3.250 | 2.816  | H  |
| HETATM | 43 | H  | 0 | -0.793 | -2.145 | 2.516  | H  |
| HETATM | 44 | C  | 0 | -1.404 | -2.572 | -2.575 | C  |
| HETATM | 45 | H  | 0 | -1.429 | -3.668 | -2.736 | H  |
| HETATM | 46 | H  | 0 | -1.811 | -2.099 | -3.483 | H  |
| HETATM | 47 | H  | 0 | -0.348 | -2.266 | -2.498 | H  |
| HETATM | 48 | C  | 0 | -5.803 | -1.278 | -0.516 | C  |
| HETATM | 49 | H  | 0 | -5.912 | -0.177 | -0.478 | H  |
| HETATM | 50 | H  | 0 | -6.226 | -1.611 | -1.478 | H  |
| HETATM | 51 | H  | 0 | -6.431 | -1.684 | 0.297  | H  |
| HETATM | 52 | H  | 0 | 2.534  | -3.692 | 0.890  | H  |
| HETATM | 53 | H  | 0 | 0.189  | -4.144 | 1.116  | H  |
| HETATM | 54 | C  | 0 | -2.057 | 2.993  | -0.089 | C  |
| HETATM | 55 | C  | 0 | 1.326  | 1.499  | 0.033  | C  |
| HETATM | 56 | F  | 0 | -1.449 | 3.642  | 0.870  | F  |
| HETATM | 57 | F  | 0 | -1.742 | 3.417  | -1.283 | F  |
| HETATM | 58 | F  | 0 | 2.323  | 1.478  | 0.888  | F  |
| HETATM | 59 | Cl | 0 | 1.520  | 2.925  | -0.971 | Cl |
| HETATM | 60 | F  | 0 | -3.614 | 1.482  | -0.891 | F  |
| HETATM | 61 | Cl | 0 | -3.623 | 1.687  | 1.672  | Cl |

END

## st5f.pdb

|        |          |    |   |        |        |        |    |
|--------|----------|----|---|--------|--------|--------|----|
| TITLE  | st5f.pdb |    |   |        |        |        |    |
| HETATM | 1        | Ru | 0 | 0.060  | -0.585 | -0.012 | Ru |
| HETATM | 2        | Cl | 0 | 0.810  | -0.444 | -2.303 | Cl |
| HETATM | 3        | Cl | 0 | -0.661 | -0.423 | 2.307  | Cl |
| HETATM | 4        | C  | 0 | -0.067 | 1.493  | 0.067  | C  |
| HETATM | 5        | N  | 0 | 0.999  | 2.297  | 0.155  | N  |
| HETATM | 6        | C  | 0 | 0.618  | 3.711  | 0.269  | C  |
| HETATM | 7        | C  | 0 | -0.910 | 3.660  | 0.185  | C  |
| HETATM | 8        | N  | 0 | -1.191 | 2.220  | 0.101  | N  |
| HETATM | 9        | C  | 0 | 2.343  | 1.821  | 0.021  | C  |
| HETATM | 10       | C  | 0 | 2.960  | 1.860  | -1.244 | C  |
| HETATM | 11       | C  | 0 | 4.229  | 1.290  | -1.378 | C  |
| HETATM | 12       | C  | 0 | 4.888  | 0.701  | -0.294 | C  |
| HETATM | 13       | C  | 0 | 4.280  | 0.741  | 0.965  | C  |

|        |    |    |   |        |        |        |    |
|--------|----|----|---|--------|--------|--------|----|
| HETATM | 14 | C  | 0 | 3.014  | 1.307  | 1.151  | C  |
| HETATM | 15 | C  | 0 | -2.508 | 1.666  | 0.057  | C  |
| HETATM | 16 | C  | 0 | -3.270 | 1.579  | 1.237  | C  |
| HETATM | 17 | C  | 0 | -4.522 | 0.958  | 1.170  | C  |
| HETATM | 18 | C  | 0 | -5.026 | 0.445  | -0.029 | C  |
| HETATM | 19 | C  | 0 | -4.272 | 0.604  | -1.197 | C  |
| HETATM | 20 | C  | 0 | -3.018 | 1.224  | -1.179 | C  |
| HETATM | 21 | C  | 0 | 2.301  | 2.510  | -2.422 | C  |
| HETATM | 22 | C  | 0 | 6.207  | 0.016  | -0.483 | C  |
| HETATM | 23 | C  | 0 | 2.409  | 1.393  | 2.519  | C  |
| HETATM | 24 | C  | 0 | -2.793 | 2.163  | 2.532  | C  |
| HETATM | 25 | C  | 0 | -6.339 | -0.276 | -0.060 | C  |
| HETATM | 26 | C  | 0 | -2.252 | 1.431  | -2.449 | C  |
| HETATM | 27 | H  | 0 | 1.080  | 4.294  | -0.548 | H  |
| HETATM | 28 | H  | 0 | 0.988  | 4.126  | 1.225  | H  |
| HETATM | 29 | H  | 0 | -1.314 | 4.174  | -0.707 | H  |
| HETATM | 30 | H  | 0 | -1.408 | 4.093  | 1.071  | H  |
| HETATM | 31 | H  | 0 | 4.703  | 1.285  | -2.368 | H  |
| HETATM | 32 | H  | 0 | 4.798  | 0.315  | 1.833  | H  |
| HETATM | 33 | H  | 0 | -5.113 | 0.864  | 2.090  | H  |
| HETATM | 34 | H  | 0 | -4.667 | 0.240  | -2.154 | H  |
| HETATM | 35 | H  | 0 | 2.579  | 2.001  | -3.359 | H  |
| HETATM | 36 | H  | 0 | 1.201  | 2.485  | -2.360 | H  |
| HETATM | 37 | H  | 0 | 2.613  | 3.569  | -2.520 | H  |
| HETATM | 38 | H  | 0 | 6.061  | -1.053 | -0.730 | H  |
| HETATM | 39 | H  | 0 | 6.788  | 0.455  | -1.311 | H  |
| HETATM | 40 | H  | 0 | 6.826  | 0.048  | 0.429  | H  |
| HETATM | 41 | H  | 0 | 3.109  | 1.013  | 3.281  | H  |
| HETATM | 42 | H  | 0 | 1.471  | 0.812  | 2.612  | H  |
| HETATM | 43 | H  | 0 | 2.161  | 2.437  | 2.787  | H  |
| HETATM | 44 | H  | 0 | -1.695 | 2.212  | 2.591  | H  |
| HETATM | 45 | H  | 0 | -3.132 | 1.558  | 3.389  | H  |
| HETATM | 46 | H  | 0 | -3.195 | 3.186  | 2.678  | H  |
| HETATM | 47 | H  | 0 | -6.202 | -1.358 | 0.125  | H  |
| HETATM | 48 | H  | 0 | -7.032 | 0.092  | 0.716  | H  |
| HETATM | 49 | H  | 0 | -6.839 | -0.182 | -1.039 | H  |
| HETATM | 50 | H  | 0 | -1.326 | 0.825  | -2.499 | H  |
| HETATM | 51 | H  | 0 | -2.864 | 1.164  | -3.326 | H  |
| HETATM | 52 | H  | 0 | -1.938 | 2.485  | -2.570 | H  |
| HETATM | 53 | C  | 0 | -1.403 | -1.719 | -0.357 | C  |
| HETATM | 54 | Cl | 0 | -2.007 | -2.131 | -1.934 | Cl |
| HETATM | 55 | F  | 0 | -2.263 | -2.142 | 0.534  | F  |
| HETATM | 56 | C  | 0 | 0.340  | -2.850 | 0.055  | C  |
| HETATM | 57 | C  | 0 | 1.484  | -2.022 | 0.418  | C  |
| HETATM | 58 | F  | 0 | 0.460  | -3.557 | -1.059 | F  |
| HETATM | 59 | F  | 0 | -0.220 | -3.577 | 1.013  | F  |
| HETATM | 60 | F  | 0 | 2.490  | -2.041 | -0.466 | F  |
| HETATM | 61 | Cl | 0 | 2.133  | -2.144 | 2.041  | Cl |

END

### st5NB.pdb

|        |           |    |   |        |        |        |    |
|--------|-----------|----|---|--------|--------|--------|----|
| TITLE  | st5NB.pdb |    |   |        |        |        |    |
| HETATM | 1         | Ru | 0 | 0.014  | -0.500 | 0.006  | Ru |
| HETATM | 2         | C  | 0 | 0.794  | 3.693  | 0.318  | C  |
| HETATM | 3         | C  | 0 | -0.726 | 3.712  | 0.126  | C  |
| HETATM | 4         | H  | 0 | 1.336  | 4.263  | -0.457 | H  |
| HETATM | 5         | H  | 0 | -1.041 | 4.212  | -0.809 | H  |
| HETATM | 6         | C  | 0 | 0.024  | 1.521  | 0.093  | C  |
| HETATM | 7         | N  | 0 | -1.072 | 2.284  | 0.067  | N  |
| HETATM | 8         | N  | 0 | 1.127  | 2.265  | 0.211  | N  |
| HETATM | 9         | Cl | 0 | 0.809  | -0.373 | -2.271 | Cl |

|        |    |    |   |        |        |        |    |
|--------|----|----|---|--------|--------|--------|----|
| HETATM | 10 | Cl | 0 | -0.731 | -0.341 | 2.304  | Cl |
| HETATM | 11 | C  | 0 | 1.275  | -1.972 | 0.380  | C  |
| HETATM | 12 | C  | 0 | -2.404 | 1.757  | 0.023  | C  |
| HETATM | 13 | C  | 0 | -3.165 | 1.693  | 1.207  | C  |
| HETATM | 14 | C  | 0 | -2.922 | 1.305  | -1.208 | C  |
| HETATM | 15 | C  | 0 | -4.413 | 1.068  | 1.154  | C  |
| HETATM | 16 | C  | 0 | -4.175 | 0.683  | -1.209 | C  |
| HETATM | 17 | C  | 0 | -4.919 | 0.530  | -0.035 | C  |
| HETATM | 18 | H  | 0 | -5.000 | 0.985  | 2.078  | H  |
| HETATM | 19 | H  | 0 | -4.574 | 0.305  | -2.159 | H  |
| HETATM | 20 | C  | 0 | 2.451  | 1.735  | 0.068  | C  |
| HETATM | 21 | C  | 0 | 3.094  | 1.160  | 1.183  | C  |
| HETATM | 22 | C  | 0 | 3.068  | 1.781  | -1.195 | C  |
| HETATM | 23 | C  | 0 | 4.335  | 0.545  | 0.982  | C  |
| HETATM | 24 | C  | 0 | 4.313  | 1.165  | -1.345 | C  |
| HETATM | 25 | C  | 0 | 4.945  | 0.520  | -0.277 | C  |
| HETATM | 26 | H  | 0 | 4.837  | 0.078  | 1.839  | H  |
| HETATM | 27 | H  | 0 | 4.790  | 1.170  | -2.333 | H  |
| HETATM | 28 | C  | 0 | -2.689 | 2.308  | 2.487  | C  |
| HETATM | 29 | H  | 0 | -3.043 | 1.733  | 3.358  | H  |
| HETATM | 30 | H  | 0 | -1.591 | 2.346  | 2.556  | H  |
| HETATM | 31 | H  | 0 | -3.080 | 3.339  | 2.599  | H  |
| HETATM | 32 | C  | 0 | -2.176 | 1.508  | -2.491 | C  |
| HETATM | 33 | H  | 0 | -1.842 | 2.556  | -2.609 | H  |
| HETATM | 34 | H  | 0 | -1.268 | 0.879  | -2.567 | H  |
| HETATM | 35 | H  | 0 | -2.813 | 1.262  | -3.356 | H  |
| HETATM | 36 | C  | 0 | -6.217 | -0.216 | -0.045 | C  |
| HETATM | 37 | H  | 0 | -6.051 | -1.292 | 0.151  | H  |
| HETATM | 38 | H  | 0 | -6.910 | 0.145  | 0.734  | H  |
| HETATM | 39 | H  | 0 | -6.727 | -0.147 | -1.021 | H  |
| HETATM | 40 | C  | 0 | 2.490  | 1.232  | 2.552  | C  |
| HETATM | 41 | H  | 0 | 3.195  | 0.857  | 3.311  | H  |
| HETATM | 42 | H  | 0 | 2.226  | 2.271  | 2.826  | H  |
| HETATM | 43 | H  | 0 | 1.560  | 0.641  | 2.645  | H  |
| HETATM | 44 | C  | 0 | 2.438  | 2.488  | -2.357 | C  |
| HETATM | 45 | H  | 0 | 2.795  | 3.535  | -2.431 | H  |
| HETATM | 46 | H  | 0 | 2.693  | 1.991  | -3.307 | H  |
| HETATM | 47 | H  | 0 | 1.337  | 2.507  | -2.298 | H  |
| HETATM | 48 | C  | 0 | 6.243  | -0.201 | -0.480 | C  |
| HETATM | 49 | H  | 0 | 6.067  | -1.267 | -0.720 | H  |
| HETATM | 50 | H  | 0 | 6.824  | 0.222  | -1.316 | H  |
| HETATM | 51 | H  | 0 | 6.874  | -0.181 | 0.424  | H  |
| HETATM | 52 | H  | 0 | -1.264 | 4.194  | 0.961  | H  |
| HETATM | 53 | H  | 0 | 1.113  | 4.079  | 1.304  | H  |
| HETATM | 54 | C  | 0 | -0.070 | -2.788 | 0.002  | C  |
| HETATM | 55 | C  | 0 | -1.348 | -1.869 | -0.358 | C  |
| HETATM | 56 | F  | 0 | 2.248  | -2.238 | -0.493 | F  |
| HETATM | 57 | F  | 0 | 0.233  | -3.586 | -1.033 | F  |
| HETATM | 58 | F  | 0 | -0.438 | -3.548 | 1.043  | F  |
| HETATM | 59 | F  | 0 | -2.335 | -2.090 | 0.509  | F  |
| HETATM | 60 | Cl | 0 | -1.998 | -2.112 | -1.977 | Cl |
| HETATM | 61 | Cl | 0 | 1.904  | -2.320 | 1.985  | Cl |

END

### st5g.pdb

|        |          |    |   |        |        |        |    |
|--------|----------|----|---|--------|--------|--------|----|
| TITLE  | st5g.pdb |    |   |        |        |        |    |
| HETATM | 1        | Ru | 0 | 0.060  | -0.585 | -0.012 | Ru |
| HETATM | 2        | Cl | 0 | 0.810  | -0.444 | -2.303 | Cl |
| HETATM | 3        | Cl | 0 | -0.661 | -0.423 | 2.307  | Cl |
| HETATM | 4        | C  | 0 | -0.067 | 1.493  | 0.067  | C  |
| HETATM | 5        | N  | 0 | 0.999  | 2.297  | 0.155  | N  |

|        |    |    |   |        |        |        |    |
|--------|----|----|---|--------|--------|--------|----|
| HETATM | 6  | C  | 0 | 0.618  | 3.711  | 0.269  | C  |
| HETATM | 7  | C  | 0 | -0.910 | 3.660  | 0.185  | C  |
| HETATM | 8  | N  | 0 | -1.191 | 2.220  | 0.101  | N  |
| HETATM | 9  | C  | 0 | 2.343  | 1.821  | 0.021  | C  |
| HETATM | 10 | C  | 0 | 2.960  | 1.860  | -1.244 | C  |
| HETATM | 11 | C  | 0 | 4.229  | 1.290  | -1.378 | C  |
| HETATM | 12 | C  | 0 | 4.888  | 0.701  | -0.294 | C  |
| HETATM | 13 | C  | 0 | 4.280  | 0.741  | 0.965  | C  |
| HETATM | 14 | C  | 0 | 3.014  | 1.307  | 1.151  | C  |
| HETATM | 15 | C  | 0 | -2.508 | 1.666  | 0.057  | C  |
| HETATM | 16 | C  | 0 | -3.270 | 1.579  | 1.237  | C  |
| HETATM | 17 | C  | 0 | -4.522 | 0.958  | 1.170  | C  |
| HETATM | 18 | C  | 0 | -5.026 | 0.445  | -0.029 | C  |
| HETATM | 19 | C  | 0 | -4.272 | 0.604  | -1.197 | C  |
| HETATM | 20 | C  | 0 | -3.018 | 1.224  | -1.179 | C  |
| HETATM | 21 | C  | 0 | 2.301  | 2.510  | -2.422 | C  |
| HETATM | 22 | C  | 0 | 6.207  | 0.016  | -0.483 | C  |
| HETATM | 23 | C  | 0 | 2.409  | 1.393  | 2.519  | C  |
| HETATM | 24 | C  | 0 | -2.793 | 2.163  | 2.532  | C  |
| HETATM | 25 | C  | 0 | -6.339 | -0.276 | -0.060 | C  |
| HETATM | 26 | C  | 0 | -2.252 | 1.431  | -2.449 | C  |
| HETATM | 27 | H  | 0 | 1.080  | 4.294  | -0.548 | H  |
| HETATM | 28 | H  | 0 | 0.988  | 4.126  | 1.225  | H  |
| HETATM | 29 | H  | 0 | -1.314 | 4.174  | -0.707 | H  |
| HETATM | 30 | H  | 0 | -1.408 | 4.093  | 1.071  | H  |
| HETATM | 31 | H  | 0 | 4.703  | 1.285  | -2.368 | H  |
| HETATM | 32 | H  | 0 | 4.798  | 0.315  | 1.833  | H  |
| HETATM | 33 | H  | 0 | -5.113 | 0.864  | 2.090  | H  |
| HETATM | 34 | H  | 0 | -4.667 | 0.240  | -2.154 | H  |
| HETATM | 35 | H  | 0 | 2.579  | 2.001  | -3.359 | H  |
| HETATM | 36 | H  | 0 | 1.201  | 2.485  | -2.360 | H  |
| HETATM | 37 | H  | 0 | 2.613  | 3.569  | -2.520 | H  |
| HETATM | 38 | H  | 0 | 6.061  | -1.053 | -0.730 | H  |
| HETATM | 39 | H  | 0 | 6.788  | 0.455  | -1.311 | H  |
| HETATM | 40 | H  | 0 | 6.826  | 0.048  | 0.429  | H  |
| HETATM | 41 | H  | 0 | 3.109  | 1.013  | 3.281  | H  |
| HETATM | 42 | H  | 0 | 1.471  | 0.812  | 2.612  | H  |
| HETATM | 43 | H  | 0 | 2.161  | 2.437  | 2.787  | H  |
| HETATM | 44 | H  | 0 | -1.695 | 2.212  | 2.591  | H  |
| HETATM | 45 | H  | 0 | -3.132 | 1.558  | 3.389  | H  |
| HETATM | 46 | H  | 0 | -3.195 | 3.186  | 2.678  | H  |
| HETATM | 47 | H  | 0 | -6.202 | -1.358 | 0.125  | H  |
| HETATM | 48 | H  | 0 | -7.032 | 0.092  | 0.716  | H  |
| HETATM | 49 | H  | 0 | -6.839 | -0.182 | -1.039 | H  |
| HETATM | 50 | H  | 0 | -1.326 | 0.825  | -2.499 | H  |
| HETATM | 51 | H  | 0 | -2.864 | 1.164  | -3.326 | H  |
| HETATM | 52 | H  | 0 | -1.938 | 2.485  | -2.570 | H  |
| HETATM | 53 | C  | 0 | -1.403 | -1.719 | -0.357 | C  |
| HETATM | 54 | Cl | 0 | -2.007 | -2.131 | -1.934 | Cl |
| HETATM | 55 | F  | 0 | -2.263 | -2.142 | 0.534  | F  |
| HETATM | 56 | C  | 0 | 0.340  | -2.850 | 0.055  | C  |
| HETATM | 57 | C  | 0 | 1.484  | -2.022 | 0.418  | C  |
| HETATM | 58 | F  | 0 | 0.460  | -3.557 | -1.059 | F  |
| HETATM | 59 | F  | 0 | -0.220 | -3.577 | 1.013  | F  |
| HETATM | 60 | F  | 0 | 2.490  | -2.041 | -0.466 | F  |
| HETATM | 61 | Cl | 0 | 2.133  | -2.144 | 2.041  | Cl |

END

## st5h.pdb

TITLE st5h.pdb  
 REMARK 1 File created by GaussView 5.0.8

|        |    |    |   |        |        |        |    |
|--------|----|----|---|--------|--------|--------|----|
| HETATM | 1  | Ru | 0 | -0.152 | 0.454  | 0.002  | Ru |
| HETATM | 2  | C  | 0 | 0.450  | -3.656 | 0.156  | C  |
| HETATM | 3  | C  | 0 | 1.928  | -3.281 | 0.064  | C  |
| HETATM | 4  | H  | 0 | 0.124  | -4.329 | -0.658 | H  |
| HETATM | 5  | H  | 0 | 2.399  | -3.611 | -0.882 | H  |
| HETATM | 6  | C  | 0 | 0.660  | -1.315 | 0.066  | C  |
| HETATM | 7  | N  | 0 | 1.915  | -1.815 | 0.122  | N  |
| HETATM | 8  | N  | 0 | -0.212 | -2.361 | 0.051  | N  |
| HETATM | 9  | Cl | 0 | -0.625 | 0.563  | -2.327 | Cl |
| HETATM | 10 | Cl | 0 | -0.340 | 0.609  | 2.378  | Cl |
| HETATM | 11 | C  | 0 | -3.004 | 2.061  | 0.130  | C  |
| HETATM | 12 | C  | 0 | 3.142  | -1.092 | 0.063  | C  |
| HETATM | 13 | C  | 0 | 3.854  | -0.876 | 1.256  | C  |
| HETATM | 14 | C  | 0 | 3.629  | -0.640 | -1.175 | C  |
| HETATM | 15 | C  | 0 | 5.079  | -0.209 | 1.190  | C  |
| HETATM | 16 | C  | 0 | 4.853  | 0.042  | -1.195 | C  |
| HETATM | 17 | C  | 0 | 5.590  | 0.261  | -0.027 | C  |
| HETATM | 18 | H  | 0 | 5.638  | -0.029 | 2.117  | H  |
| HETATM | 19 | H  | 0 | 5.242  | 0.402  | -2.157 | H  |
| HETATM | 20 | C  | 0 | -1.623 | -2.180 | -0.076 | C  |
| HETATM | 21 | C  | 0 | -2.424 | -2.023 | 1.076  | C  |
| HETATM | 22 | C  | 0 | -2.204 | -2.200 | -1.365 | C  |
| HETATM | 23 | C  | 0 | -3.785 | -1.752 | 0.904  | C  |
| HETATM | 24 | C  | 0 | -3.568 | -1.927 | -1.485 | C  |
| HETATM | 25 | C  | 0 | -4.366 | -1.667 | -0.365 | C  |
| HETATM | 26 | H  | 0 | -4.408 | -1.599 | 1.795  | H  |
| HETATM | 27 | H  | 0 | -4.016 | -1.904 | -2.486 | H  |
| HETATM | 28 | C  | 0 | 3.250  | -1.261 | 2.571  | C  |
| HETATM | 29 | H  | 0 | 3.922  | -1.017 | 3.410  | H  |
| HETATM | 30 | H  | 0 | 2.296  | -0.721 | 2.732  | H  |
| HETATM | 31 | H  | 0 | 3.014  | -2.339 | 2.638  | H  |
| HETATM | 32 | C  | 0 | 2.847  | -0.848 | -2.435 | C  |
| HETATM | 33 | H  | 0 | 2.456  | -1.879 | -2.521 | H  |
| HETATM | 34 | H  | 0 | 1.961  | -0.184 | -2.488 | H  |
| HETATM | 35 | H  | 0 | 3.464  | -0.647 | -3.325 | H  |
| HETATM | 36 | C  | 0 | 6.882  | 1.019  | -0.069 | C  |
| HETATM | 37 | H  | 0 | 6.721  | 2.098  | 0.118  | H  |
| HETATM | 38 | H  | 0 | 7.591  | 0.669  | 0.701  | H  |
| HETATM | 39 | H  | 0 | 7.377  | 0.938  | -1.052 | H  |
| HETATM | 40 | C  | 0 | -1.887 | -2.239 | 2.457  | C  |
| HETATM | 41 | H  | 0 | -2.309 | -1.512 | 3.169  | H  |
| HETATM | 42 | H  | 0 | -2.167 | -3.250 | 2.816  | H  |
| HETATM | 43 | H  | 0 | -0.793 | -2.145 | 2.516  | H  |
| HETATM | 44 | C  | 0 | -1.404 | -2.572 | -2.575 | C  |
| HETATM | 45 | H  | 0 | -1.429 | -3.668 | -2.736 | H  |
| HETATM | 46 | H  | 0 | -1.811 | -2.099 | -3.483 | H  |
| HETATM | 47 | H  | 0 | -0.348 | -2.266 | -2.498 | H  |
| HETATM | 48 | C  | 0 | -5.803 | -1.278 | -0.516 | C  |
| HETATM | 49 | H  | 0 | -5.912 | -0.177 | -0.478 | H  |
| HETATM | 50 | H  | 0 | -6.226 | -1.611 | -1.478 | H  |
| HETATM | 51 | H  | 0 | -6.431 | -1.684 | 0.297  | H  |
| HETATM | 52 | H  | 0 | 2.534  | -3.692 | 0.890  | H  |
| HETATM | 53 | H  | 0 | 0.189  | -4.144 | 1.116  | H  |
| HETATM | 54 | C  | 0 | -2.057 | 2.993  | -0.089 | C  |
| HETATM | 55 | C  | 0 | 1.326  | 1.499  | 0.033  | C  |
| HETATM | 56 | F  | 0 | -1.449 | 3.642  | 0.870  | F  |
| HETATM | 57 | F  | 0 | -1.742 | 3.417  | -1.283 | F  |
| HETATM | 58 | F  | 0 | 2.323  | 1.478  | 0.888  | F  |
| HETATM | 59 | Cl | 0 | 1.520  | 2.925  | -0.971 | Cl |
| HETATM | 60 | F  | 0 | -3.614 | 1.482  | -0.891 | F  |
| HETATM | 61 | Cl | 0 | -3.623 | 1.687  | 1.672  | Cl |

END



## ac5e.pdb

| TITLE  | ac5e.pdb |    |   |        |        |        |    |
|--------|----------|----|---|--------|--------|--------|----|
| HETATM | 1        | Ru | 0 | -0.187 | 0.408  | -0.114 | Ru |
| HETATM | 2        | C  | 0 | 0.434  | -3.628 | 0.719  | C  |
| HETATM | 3        | C  | 0 | 1.895  | -3.198 | 0.824  | C  |
| HETATM | 4        | H  | 0 | 0.254  | -4.343 | -0.110 | H  |
| HETATM | 5        | H  | 0 | 2.575  | -3.800 | 0.195  | H  |
| HETATM | 6        | C  | 0 | 0.614  | -1.337 | 0.217  | C  |
| HETATM | 7        | N  | 0 | 1.874  | -1.804 | 0.370  | N  |
| HETATM | 8        | N  | 0 | -0.246 | -2.366 | 0.455  | N  |
| HETATM | 9        | Cl | 0 | -0.600 | 0.166  | -2.443 | Cl |
| HETATM | 10       | Cl | 0 | -0.554 | 0.918  | 2.177  | Cl |
| HETATM | 11       | C  | 0 | -3.065 | 1.912  | -0.405 | C  |
| HETATM | 12       | C  | 0 | 3.100  | -1.095 | 0.219  | C  |
| HETATM | 13       | C  | 0 | 3.619  | -0.334 | 1.280  | C  |
| HETATM | 14       | C  | 0 | 3.792  | -1.223 | -1.000 | C  |
| HETATM | 15       | C  | 0 | 4.853  | 0.304  | 1.094  | C  |
| HETATM | 16       | C  | 0 | 5.025  | -0.584 | -1.139 | C  |
| HETATM | 17       | C  | 0 | 5.568  | 0.186  | -0.101 | C  |
| HETATM | 18       | H  | 0 | 5.267  | 0.904  | 1.914  | H  |
| HETATM | 19       | H  | 0 | 5.568  | -0.674 | -2.089 | H  |
| HETATM | 20       | C  | 0 | -1.660 | -2.240 | 0.303  | C  |
| HETATM | 21       | C  | 0 | -2.457 | -1.976 | 1.438  | C  |
| HETATM | 22       | C  | 0 | -2.244 | -2.426 | -0.970 | C  |
| HETATM | 23       | C  | 0 | -3.826 | -1.762 | 1.251  | C  |
| HETATM | 24       | C  | 0 | -3.616 | -2.201 | -1.107 | C  |
| HETATM | 25       | C  | 0 | -4.414 | -1.836 | -0.017 | C  |
| HETATM | 26       | H  | 0 | -4.447 | -1.520 | 2.123  | H  |
| HETATM | 27       | H  | 0 | -4.072 | -2.306 | -2.100 | H  |
| HETATM | 28       | C  | 0 | 2.862  | -0.163 | 2.560  | C  |
| HETATM | 29       | H  | 0 | 3.535  | 0.111  | 3.390  | H  |
| HETATM | 30       | H  | 0 | 2.095  | 0.631  | 2.478  | H  |
| HETATM | 31       | H  | 0 | 2.306  | -1.072 | 2.853  | H  |
| HETATM | 32       | C  | 0 | 3.163  | -1.953 | -2.146 | C  |
| HETATM | 33       | H  | 0 | 2.900  | -2.999 | -1.899 | H  |
| HETATM | 34       | H  | 0 | 2.220  | -1.460 | -2.455 | H  |
| HETATM | 35       | H  | 0 | 3.830  | -1.978 | -3.023 | H  |
| HETATM | 36       | C  | 0 | 6.875  | 0.897  | -0.287 | C  |
| HETATM | 37       | H  | 0 | 6.740  | 1.848  | -0.835 | H  |
| HETATM | 38       | H  | 0 | 7.349  | 1.148  | 0.677  | H  |
| HETATM | 39       | H  | 0 | 7.591  | 0.296  | -0.874 | H  |
| HETATM | 40       | C  | 0 | -1.889 | -2.011 | 2.823  | C  |
| HETATM | 41       | H  | 0 | -2.380 | -1.275 | 3.479  | H  |
| HETATM | 42       | H  | 0 | -2.050 | -3.011 | 3.275  | H  |
| HETATM | 43       | H  | 0 | -0.809 | -1.797 | 2.848  | H  |
| HETATM | 44       | C  | 0 | -1.449 | -2.935 | -2.132 | C  |
| HETATM | 45       | H  | 0 | -1.526 | -4.039 | -2.194 | H  |
| HETATM | 46       | H  | 0 | -1.823 | -2.526 | -3.084 | H  |
| HETATM | 47       | H  | 0 | -0.380 | -2.675 | -2.071 | H  |
| HETATM | 48       | C  | 0 | -5.858 | -1.494 | -0.209 | C  |
| HETATM | 49       | H  | 0 | -5.977 | -0.411 | -0.407 | H  |
| HETATM | 50       | H  | 0 | -6.301 | -2.024 | -1.069 | H  |
| HETATM | 51       | H  | 0 | -6.463 | -1.720 | 0.686  | H  |
| HETATM | 52       | H  | 0 | 2.282  | -3.245 | 1.861  | H  |
| HETATM | 53       | H  | 0 | 0.050  | -4.090 | 1.646  | H  |
| HETATM | 54       | C  | 0 | -2.221 | 2.956  | -0.497 | C  |
| HETATM | 55       | C  | 0 | 1.301  | 1.383  | -0.431 | C  |
| HETATM | 56       | F  | 0 | -3.631 | 1.545  | 0.715  | F  |
| HETATM | 57       | F  | 0 | -1.721 | 3.322  | -1.666 | F  |

|        |    |    |   |        |       |        |    |
|--------|----|----|---|--------|-------|--------|----|
| HETATM | 58 | F  | 0 | 2.250  | 1.154 | -1.311 | F  |
| HETATM | 59 | F  | 0 | -3.478 | 1.220 | -1.435 | F  |
| HETATM | 60 | Cl | 0 | 1.564  | 2.982 | 0.241  | Cl |
| HETATM | 61 | Cl | 0 | -1.863 | 3.973 | 0.821  | Cl |

END

### ac5f.pdb

| TITLE  | ac5f.pdb |    |   |        |        |        |    |
|--------|----------|----|---|--------|--------|--------|----|
| HETATM | 1        | Ru | 0 | -0.062 | 0.543  | -0.063 | Ru |
| HETATM | 2        | Cl | 0 | -0.905 | 0.150  | -2.319 | Cl |
| HETATM | 3        | Cl | 0 | 0.676  | 0.603  | 2.215  | Cl |
| HETATM | 4        | C  | 0 | -0.078 | -1.521 | 0.074  | C  |
| HETATM | 5        | N  | 0 | -1.185 | -2.264 | 0.193  | N  |
| HETATM | 6        | C  | 0 | -0.875 | -3.687 | 0.370  | C  |
| HETATM | 7        | C  | 0 | 0.646  | -3.729 | 0.199  | C  |
| HETATM | 8        | N  | 0 | 1.006  | -2.308 | 0.092  | N  |
| HETATM | 9        | C  | 0 | -2.506 | -1.717 | 0.211  | C  |
| HETATM | 10       | C  | 0 | -3.293 | -1.799 | -0.958 | C  |
| HETATM | 11       | C  | 0 | -4.539 | -1.173 | -0.962 | C  |
| HETATM | 12       | C  | 0 | -5.024 | -0.487 | 0.161  | C  |
| HETATM | 13       | C  | 0 | -4.252 | -0.481 | 1.323  | C  |
| HETATM | 14       | C  | 0 | -2.995 | -1.099 | 1.378  | C  |
| HETATM | 15       | C  | 0 | 2.355  | -1.836 | 0.016  | C  |
| HETATM | 16       | C  | 0 | 3.117  | -1.735 | 1.196  | C  |
| HETATM | 17       | C  | 0 | 4.409  | -1.206 | 1.108  | C  |
| HETATM | 18       | C  | 0 | 4.956  | -0.803 | -0.114 | C  |
| HETATM | 19       | C  | 0 | 4.200  | -0.978 | -1.278 | C  |
| HETATM | 20       | C  | 0 | 2.902  | -1.497 | -1.239 | C  |
| HETATM | 21       | C  | 0 | -2.832 | -2.563 | -2.161 | C  |
| HETATM | 22       | C  | 0 | -6.334 | 0.237  | 0.102  | C  |
| HETATM | 23       | C  | 0 | -2.251 | -1.111 | 2.679  | C  |
| HETATM | 24       | C  | 0 | 2.586  | -2.202 | 2.517  | C  |
| HETATM | 25       | C  | 0 | 6.308  | -0.161 | -0.176 | C  |
| HETATM | 26       | C  | 0 | 2.130  | -1.689 | -2.507 | C  |
| HETATM | 27       | H  | 0 | -1.415 | -4.292 | -0.379 | H  |
| HETATM | 28       | H  | 0 | -1.208 | -4.019 | 1.372  | H  |
| HETATM | 29       | H  | 0 | 0.965  | -4.268 | -0.713 | H  |
| HETATM | 30       | H  | 0 | 1.168  | -4.189 | 1.057  | H  |
| HETATM | 31       | H  | 0 | -5.144 | -1.206 | -1.877 | H  |
| HETATM | 32       | H  | 0 | -4.630 | 0.020  | 2.224  | H  |
| HETATM | 33       | H  | 0 | 4.997  | -1.095 | 2.028  | H  |
| HETATM | 34       | H  | 0 | 4.628  | -0.701 | -2.250 | H  |
| HETATM | 35       | H  | 0 | -3.244 | -2.130 | -3.087 | H  |
| HETATM | 36       | H  | 0 | -1.735 | -2.556 | -2.265 | H  |
| HETATM | 37       | H  | 0 | -3.169 | -3.619 | -2.118 | H  |
| HETATM | 38       | H  | 0 | -6.212 | 1.236  | -0.359 | H  |
| HETATM | 39       | H  | 0 | -6.764 | 0.396  | 1.105  | H  |
| HETATM | 40       | H  | 0 | -7.077 | -0.302 | -0.511 | H  |
| HETATM | 41       | H  | 0 | -1.936 | -0.096 | 2.978  | H  |
| HETATM | 42       | H  | 0 | -1.333 | -1.720 | 2.653  | H  |
| HETATM | 43       | H  | 0 | -2.899 | -1.500 | 3.485  | H  |
| HETATM | 44       | H  | 0 | 1.493  | -2.077 | 2.595  | H  |
| HETATM | 45       | H  | 0 | 3.035  | -1.635 | 3.348  | H  |
| HETATM | 46       | H  | 0 | 2.825  | -3.271 | 2.690  | H  |
| HETATM | 47       | H  | 0 | 6.219  | 0.943  | -0.177 | H  |
| HETATM | 48       | H  | 0 | 6.937  | -0.429 | 0.690  | H  |
| HETATM | 49       | H  | 0 | 6.856  | -0.432 | -1.095 | H  |
| HETATM | 50       | H  | 0 | 1.361  | -0.908 | -2.662 | H  |
| HETATM | 51       | H  | 0 | 2.801  | -1.672 | -3.381 | H  |
| HETATM | 52       | H  | 0 | 1.581  | -2.648 | -2.522 | H  |
| HETATM | 53       | C  | 0 | 1.306  | 1.627  | -0.784 | C  |

|        |    |    |   |        |       |        |    |
|--------|----|----|---|--------|-------|--------|----|
| HETATM | 54 | F  | 0 | 1.454  | 1.958 | -2.044 | F  |
| HETATM | 55 | Cl | 0 | 2.769  | 2.014 | 0.065  | Cl |
| HETATM | 56 | C  | 0 | -0.312 | 2.817 | -0.209 | C  |
| HETATM | 57 | C  | 0 | -1.486 | 1.991 | 0.128  | C  |
| HETATM | 58 | F  | 0 | -0.433 | 3.415 | -1.400 | F  |
| HETATM | 59 | Cl | 0 | 0.290  | 3.906 | 1.010  | Cl |
| HETATM | 60 | F  | 0 | -2.513 | 2.075 | -0.709 | F  |
| HETATM | 61 | F  | 0 | -1.959 | 2.070 | 1.376  | F  |

END

### ac5PB.pdb

| TITLE  | ac5PB.pdb |    |   |        |        |        |    |
|--------|-----------|----|---|--------|--------|--------|----|
| HETATM | 1         | Ru | 0 | -0.076 | 0.463  | -0.035 | Ru |
| HETATM | 2         | C  | 0 | -0.927 | -3.705 | 0.357  | C  |
| HETATM | 3         | C  | 0 | 0.591  | -3.759 | 0.147  | C  |
| HETATM | 4         | H  | 0 | -1.490 | -4.308 | -0.376 | H  |
| HETATM | 5         | H  | 0 | 0.882  | -4.276 | -0.787 | H  |
| HETATM | 6         | C  | 0 | -0.116 | -1.556 | 0.064  | C  |
| HETATM | 7         | N  | 0 | 0.966  | -2.340 | 0.067  | N  |
| HETATM | 8         | N  | 0 | -1.232 | -2.281 | 0.182  | N  |
| HETATM | 9         | Cl | 0 | -0.895 | 0.093  | -2.298 | Cl |
| HETATM | 10        | Cl | 0 | 0.643  | 0.552  | 2.245  | Cl |
| HETATM | 11        | C  | 0 | -1.376 | 1.908  | 0.145  | C  |
| HETATM | 12        | C  | 0 | 2.312  | -1.855 | -0.010 | C  |
| HETATM | 13        | C  | 0 | 3.079  | -1.774 | 1.169  | C  |
| HETATM | 14        | C  | 0 | 2.848  | -1.488 | -1.261 | C  |
| HETATM | 15        | C  | 0 | 4.365  | -1.235 | 1.085  | C  |
| HETATM | 16        | C  | 0 | 4.143  | -0.960 | -1.295 | C  |
| HETATM | 17        | C  | 0 | 4.903  | -0.803 | -0.133 | C  |
| HETATM | 18        | H  | 0 | 4.958  | -1.137 | 2.003  | H  |
| HETATM | 19        | H  | 0 | 4.564  | -0.658 | -2.263 | H  |
| HETATM | 20        | C  | 0 | -2.540 | -1.700 | 0.215  | C  |
| HETATM | 21        | C  | 0 | -2.990 | -1.055 | 1.382  | C  |
| HETATM | 22        | C  | 0 | -3.340 | -1.755 | -0.947 | C  |
| HETATM | 23        | C  | 0 | -4.211 | -0.367 | 1.329  | C  |
| HETATM | 24        | C  | 0 | -4.554 | -1.069 | -0.946 | C  |
| HETATM | 25        | C  | 0 | -4.991 | -0.343 | 0.172  | C  |
| HETATM | 26        | H  | 0 | -4.556 | 0.160  | 2.228  | H  |
| HETATM | 27        | H  | 0 | -5.168 | -1.081 | -1.855 | H  |
| HETATM | 28        | C  | 0 | 2.556  | -2.271 | 2.482  | C  |
| HETATM | 29        | H  | 0 | 3.016  | -1.727 | 3.323  | H  |
| HETATM | 30        | H  | 0 | 1.465  | -2.142 | 2.574  | H  |
| HETATM | 31        | H  | 0 | 2.790  | -3.345 | 2.627  | H  |
| HETATM | 32        | C  | 0 | 2.076  | -1.646 | -2.534 | C  |
| HETATM | 33        | H  | 0 | 1.356  | -2.482 | -2.494 | H  |
| HETATM | 34        | H  | 0 | 1.471  | -0.750 | -2.766 | H  |
| HETATM | 35        | H  | 0 | 2.757  | -1.818 | -3.384 | H  |
| HETATM | 36        | C  | 0 | 6.248  | -0.147 | -0.187 | C  |
| HETATM | 37        | H  | 0 | 6.145  | 0.955  | -0.171 | H  |
| HETATM | 38        | H  | 0 | 6.882  | -0.422 | 0.672  | H  |
| HETATM | 39        | H  | 0 | 6.795  | -0.396 | -1.113 | H  |
| HETATM | 40        | C  | 0 | -2.255 | -1.122 | 2.687  | C  |
| HETATM | 41        | H  | 0 | -2.915 | -1.540 | 3.470  | H  |
| HETATM | 42        | H  | 0 | -1.343 | -1.738 | 2.646  | H  |
| HETATM | 43        | H  | 0 | -1.935 | -0.124 | 3.033  | H  |
| HETATM | 44        | C  | 0 | -2.923 | -2.550 | -2.147 | C  |
| HETATM | 45        | H  | 0 | -3.262 | -3.602 | -2.068 | H  |
| HETATM | 46        | H  | 0 | -3.365 | -2.137 | -3.068 | H  |
| HETATM | 47        | H  | 0 | -1.830 | -2.549 | -2.288 | H  |
| HETATM | 48        | C  | 0 | -6.259 | 0.450  | 0.112  | C  |
| HETATM | 49        | H  | 0 | -6.102 | 1.405  | -0.426 | H  |

|        |    |    |   |        |        |        |    |
|--------|----|----|---|--------|--------|--------|----|
| HETATM | 50 | H  | 0 | -7.057 | -0.086 | -0.431 | H  |
| HETATM | 51 | H  | 0 | -6.637 | 0.704  | 1.116  | H  |
| HETATM | 52 | H  | 0 | 1.128  | -4.245 | 0.980  | H  |
| HETATM | 53 | H  | 0 | -1.235 | -4.030 | 1.369  | H  |
| HETATM | 54 | C  | 0 | -0.022 | 2.734  | -0.318 | C  |
| HETATM | 55 | C  | 0 | 1.221  | 1.788  | -0.697 | C  |
| HETATM | 56 | F  | 0 | -2.360 | 2.153  | -0.704 | F  |
| HETATM | 57 | F  | 0 | -1.828 | 2.221  | 1.356  | F  |
| HETATM | 58 | F  | 0 | -0.375 | 3.353  | -1.461 | F  |
| HETATM | 59 | F  | 0 | 1.481  | 1.904  | -2.003 | F  |
| HETATM | 60 | Cl | 0 | 2.743  | 2.014  | 0.155  | Cl |
| HETATM | 61 | Cl | 0 | 0.368  | 3.950  | 0.916  | Cl |

END

## ac5g.pdb

| TITLE  | ac5g.pdb |    |   |        |        |        |    |
|--------|----------|----|---|--------|--------|--------|----|
| HETATM | 1        | Ru | 0 | -0.071 | 0.533  | -0.030 | Ru |
| HETATM | 2        | Cl | 0 | 0.690  | 0.599  | 2.255  | Cl |
| HETATM | 3        | Cl | 0 | -0.920 | 0.176  | -2.278 | Cl |
| HETATM | 4        | C  | 0 | -0.148 | -1.513 | 0.136  | C  |
| HETATM | 5        | N  | 0 | 0.914  | -2.325 | 0.139  | N  |
| HETATM | 6        | C  | 0 | 0.521  | -3.734 | 0.269  | C  |
| HETATM | 7        | C  | 0 | -0.997 | -3.652 | 0.458  | C  |
| HETATM | 8        | N  | 0 | -1.275 | -2.219 | 0.296  | N  |
| HETATM | 9        | C  | 0 | 2.269  | -1.881 | 0.015  | C  |
| HETATM | 10       | C  | 0 | 3.073  | -1.804 | 1.170  | C  |
| HETATM | 11       | C  | 0 | 4.379  | -1.326 | 1.036  | C  |
| HETATM | 12       | C  | 0 | 4.901  | -0.950 | -0.207 | C  |
| HETATM | 13       | C  | 0 | 4.100  | -1.095 | -1.342 | C  |
| HETATM | 14       | C  | 0 | 2.784  | -1.564 | -1.259 | C  |
| HETATM | 15       | C  | 0 | -2.590 | -1.656 | 0.235  | C  |
| HETATM | 16       | C  | 0 | -3.320 | -1.751 | -0.966 | C  |
| HETATM | 17       | C  | 0 | -4.560 | -1.112 | -1.040 | C  |
| HETATM | 18       | C  | 0 | -5.087 | -0.401 | 0.045  | C  |
| HETATM | 19       | C  | 0 | -4.368 | -0.380 | 1.244  | C  |
| HETATM | 20       | C  | 0 | -3.126 | -1.013 | 1.368  | C  |
| HETATM | 21       | C  | 0 | 2.566  | -2.246 | 2.508  | C  |
| HETATM | 22       | C  | 0 | 6.275  | -0.365 | -0.317 | C  |
| HETATM | 23       | C  | 0 | 1.971  | -1.717 | -2.507 | C  |
| HETATM | 24       | C  | 0 | -2.813 | -2.539 | -2.135 | C  |
| HETATM | 25       | C  | 0 | -6.388 | 0.330  | -0.083 | C  |
| HETATM | 26       | C  | 0 | -2.410 | -1.013 | 2.684  | C  |
| HETATM | 27       | H  | 0 | 1.042  | -4.194 | 1.127  | H  |
| HETATM | 28       | H  | 0 | 0.818  | -4.291 | -0.640 | H  |
| HETATM | 29       | H  | 0 | -1.328 | -3.988 | 1.458  | H  |
| HETATM | 30       | H  | 0 | -1.561 | -4.233 | -0.292 | H  |
| HETATM | 31       | H  | 0 | 5.003  | -1.236 | 1.934  | H  |
| HETATM | 32       | H  | 0 | 4.505  | -0.835 | -2.329 | H  |
| HETATM | 33       | H  | 0 | -5.122 | -1.158 | -1.981 | H  |
| HETATM | 34       | H  | 0 | -4.788 | 0.133  | 2.119  | H  |
| HETATM | 35       | H  | 0 | 3.060  | -1.689 | 3.322  | H  |
| HETATM | 36       | H  | 0 | 1.482  | -2.084 | 2.620  | H  |
| HETATM | 37       | H  | 0 | 2.775  | -3.321 | 2.682  | H  |
| HETATM | 38       | H  | 0 | 6.232  | 0.741  | -0.303 | H  |
| HETATM | 39       | H  | 0 | 6.771  | -0.647 | -1.262 | H  |
| HETATM | 40       | H  | 0 | 6.927  | -0.670 | 0.519  | H  |
| HETATM | 41       | H  | 0 | 2.617  | -1.962 | -3.367 | H  |
| HETATM | 42       | H  | 0 | 1.421  | -0.792 | -2.759 | H  |
| HETATM | 43       | H  | 0 | 1.199  | -2.502 | -2.420 | H  |
| HETATM | 44       | H  | 0 | -1.713 | -2.558 | -2.184 | H  |

|        |    |    |   |        |        |        |    |
|--------|----|----|---|--------|--------|--------|----|
| HETATM | 45 | H  | 0 | -3.166 | -2.106 | -3.085 | H  |
| HETATM | 46 | H  | 0 | -3.178 | -3.586 | -2.101 | H  |
| HETATM | 47 | H  | 0 | -6.237 | 1.334  | -0.525 | H  |
| HETATM | 48 | H  | 0 | -7.097 | -0.199 | -0.742 | H  |
| HETATM | 49 | H  | 0 | -6.875 | 0.482  | 0.895  | H  |
| HETATM | 50 | H  | 0 | -1.587 | -0.275 | 2.724  | H  |
| HETATM | 51 | H  | 0 | -3.105 | -0.777 | 3.507  | H  |
| HETATM | 52 | H  | 0 | -1.946 | -1.991 | 2.906  | H  |
| HETATM | 53 | C  | 0 | -1.400 | 1.872  | 0.225  | C  |
| HETATM | 54 | F  | 0 | -1.776 | 2.278  | 1.420  | F  |
| HETATM | 55 | F  | 0 | -2.340 | 2.223  | -0.617 | F  |
| HETATM | 56 | C  | 0 | 0.173  | 2.771  | -0.340 | C  |
| HETATM | 57 | C  | 0 | 1.298  | 1.833  | -0.723 | C  |
| HETATM | 58 | Cl | 0 | 0.500  | 3.936  | 0.936  | Cl |
| HETATM | 59 | F  | 0 | -0.309 | 3.391  | -1.429 | F  |
| HETATM | 60 | Cl | 0 | 2.834  | 1.911  | 0.123  | Cl |
| HETATM | 61 | F  | 0 | 1.550  | 1.845  | -2.040 | F  |

END

### ac5h.pdb

| TITLE  | ac5h.pdb |    |   |        |        |        |    |
|--------|----------|----|---|--------|--------|--------|----|
| HETATM | 1        | Ru | 0 | 0.158  | 0.396  | -0.076 | Ru |
| HETATM | 2        | C  | 0 | -0.503 | -3.677 | 0.416  | C  |
| HETATM | 3        | C  | 0 | -1.973 | -3.260 | 0.496  | C  |
| HETATM | 4        | H  | 0 | -0.158 | -4.219 | 1.315  | H  |
| HETATM | 5        | H  | 0 | -2.412 | -3.431 | 1.498  | H  |
| HETATM | 6        | C  | 0 | -0.673 | -1.350 | 0.137  | C  |
| HETATM | 7        | N  | 0 | -1.937 | -1.823 | 0.207  | N  |
| HETATM | 8        | N  | 0 | 0.182  | -2.396 | 0.293  | N  |
| HETATM | 9        | Cl | 0 | 0.550  | 0.729  | 2.266  | Cl |
| HETATM | 10       | Cl | 0 | 0.256  | 0.327  | -2.470 | Cl |
| HETATM | 11       | C  | 0 | 2.661  | 2.090  | -0.549 | C  |
| HETATM | 12       | C  | 0 | -3.138 | -1.058 | 0.146  | C  |
| HETATM | 13       | C  | 0 | -3.814 | -0.958 | -1.084 | C  |
| HETATM | 14       | C  | 0 | -3.637 | -0.446 | 1.310  | C  |
| HETATM | 15       | C  | 0 | -5.011 | -0.239 | -1.129 | C  |
| HETATM | 16       | C  | 0 | -4.829 | 0.281  | 1.217  | C  |
| HETATM | 17       | C  | 0 | -5.527 | 0.393  | 0.009  | C  |
| HETATM | 18       | H  | 0 | -5.542 | -0.152 | -2.085 | H  |
| HETATM | 19       | H  | 0 | -5.224 | 0.768  | 2.118  | H  |
| HETATM | 20       | C  | 0 | 1.596  | -2.232 | 0.165  | C  |
| HETATM | 21       | C  | 0 | 2.186  | -2.259 | -1.119 | C  |
| HETATM | 22       | C  | 0 | 2.389  | -2.080 | 1.325  | C  |
| HETATM | 23       | C  | 0 | 3.555  | -1.993 | -1.226 | C  |
| HETATM | 24       | C  | 0 | 3.755  | -1.838 | 1.167  | C  |
| HETATM | 25       | C  | 0 | 4.348  | -1.758 | -0.099 | C  |
| HETATM | 26       | H  | 0 | 4.013  | -1.979 | -2.224 | H  |
| HETATM | 27       | H  | 0 | 4.373  | -1.697 | 2.064  | H  |
| HETATM | 28       | C  | 0 | -3.207 | -1.532 | -2.325 | C  |
| HETATM | 29       | H  | 0 | -3.897 | -1.464 | -3.182 | H  |
| HETATM | 30       | H  | 0 | -2.282 | -0.984 | -2.593 | H  |
| HETATM | 31       | H  | 0 | -2.918 | -2.593 | -2.210 | H  |
| HETATM | 32       | C  | 0 | -2.894 | -0.543 | 2.607  | C  |
| HETATM | 33       | H  | 0 | -2.628 | -1.585 | 2.862  | H  |
| HETATM | 34       | H  | 0 | -1.938 | 0.015  | 2.578  | H  |
| HETATM | 35       | H  | 0 | -3.491 | -0.138 | 3.440  | H  |
| HETATM | 36       | C  | 0 | -6.786 | 1.203  | -0.073 | C  |
| HETATM | 37       | H  | 0 | -6.568 | 2.256  | -0.332 | H  |
| HETATM | 38       | H  | 0 | -7.472 | 0.823  | -0.850 | H  |
| HETATM | 39       | H  | 0 | -7.330 | 1.219  | 0.886  | H  |
| HETATM | 40       | C  | 0 | 1.415  | -2.671 | -2.336 | C  |

|        |    |    |   |        |        |        |    |
|--------|----|----|---|--------|--------|--------|----|
| HETATM | 41 | H  | 0 | 1.738  | -2.109 | -3.226 | H  |
| HETATM | 42 | H  | 0 | 1.586  | -3.747 | -2.541 | H  |
| HETATM | 43 | H  | 0 | 0.330  | -2.512 | -2.238 | H  |
| HETATM | 44 | C  | 0 | 1.814  | -2.254 | 2.697  | C  |
| HETATM | 45 | H  | 0 | 2.011  | -3.280 | 3.067  | H  |
| HETATM | 46 | H  | 0 | 2.270  | -1.553 | 3.414  | H  |
| HETATM | 47 | H  | 0 | 0.728  | -2.083 | 2.726  | H  |
| HETATM | 48 | C  | 0 | 5.800  | -1.419 | -0.241 | C  |
| HETATM | 49 | H  | 0 | 5.949  | -0.322 | -0.266 | H  |
| HETATM | 50 | H  | 0 | 6.399  | -1.798 | 0.605  | H  |
| HETATM | 51 | H  | 0 | 6.230  | -1.818 | -1.174 | H  |
| HETATM | 52 | H  | 0 | -2.615 | -3.783 | -0.235 | H  |
| HETATM | 53 | H  | 0 | -0.286 | -4.316 | -0.463 | H  |
| HETATM | 54 | C  | 0 | 1.663  | 3.010  | -0.527 | C  |
| HETATM | 55 | C  | 0 | -1.361 | 1.408  | -0.115 | C  |
| HETATM | 56 | F  | 0 | 3.045  | 1.551  | -1.688 | F  |
| HETATM | 57 | F  | 0 | 1.068  | 3.364  | -1.650 | F  |
| HETATM | 58 | F  | 0 | -2.252 | 1.489  | -1.076 | F  |
| HETATM | 59 | F  | 0 | -1.721 | 2.300  | 0.785  | F  |
| HETATM | 60 | Cl | 0 | 1.235  | 3.930  | 0.838  | Cl |
| HETATM | 61 | Cl | 0 | 3.621  | 1.681  | 0.796  | Cl |

END

### at5e.pdb

| TITLE  | at5e.pdb |    |   |        |        |        |    |
|--------|----------|----|---|--------|--------|--------|----|
| HETATM | 1        | Ru | 0 | -0.255 | 0.409  | 0.015  | Ru |
| HETATM | 2        | C  | 0 | 0.196  | -3.726 | 0.216  | C  |
| HETATM | 3        | C  | 0 | 1.681  | -3.408 | 0.055  | C  |
| HETATM | 4        | H  | 0 | -0.193 | -4.388 | -0.580 | H  |
| HETATM | 5        | H  | 0 | 2.098  | -3.768 | -0.906 | H  |
| HETATM | 6        | C  | 0 | 0.488  | -1.396 | 0.090  | C  |
| HETATM | 7        | N  | 0 | 1.725  | -1.941 | 0.094  | N  |
| HETATM | 8        | N  | 0 | -0.420 | -2.407 | 0.133  | N  |
| HETATM | 9        | Cl | 0 | -0.716 | 0.482  | -2.324 | Cl |
| HETATM | 10       | Cl | 0 | -0.448 | 0.561  | 2.394  | Cl |
| HETATM | 11       | C  | 0 | -2.744 | 2.168  | 0.124  | C  |
| HETATM | 12       | C  | 0 | 2.975  | -1.262 | 0.022  | C  |
| HETATM | 13       | C  | 0 | 3.700  | -1.057 | 1.210  | C  |
| HETATM | 14       | C  | 0 | 3.478  | -0.853 | -1.225 | C  |
| HETATM | 15       | C  | 0 | 4.949  | -0.438 | 1.130  | C  |
| HETATM | 16       | C  | 0 | 4.725  | -0.216 | -1.259 | C  |
| HETATM | 17       | C  | 0 | 5.473  | -0.006 | -0.096 | C  |
| HETATM | 18       | H  | 0 | 5.519  | -0.269 | 2.053  | H  |
| HETATM | 19       | H  | 0 | 5.123  | 0.115  | -2.226 | H  |
| HETATM | 20       | C  | 0 | -1.827 | -2.175 | 0.038  | C  |
| HETATM | 21       | C  | 0 | -2.595 | -1.989 | 1.209  | C  |
| HETATM | 22       | C  | 0 | -2.435 | -2.169 | -1.238 | C  |
| HETATM | 23       | C  | 0 | -3.946 | -1.652 | 1.068  | C  |
| HETATM | 24       | C  | 0 | -3.789 | -1.837 | -1.326 | C  |
| HETATM | 25       | C  | 0 | -4.549 | -1.542 | -0.189 | C  |
| HETATM | 26       | H  | 0 | -4.542 | -1.477 | 1.973  | H  |
| HETATM | 27       | H  | 0 | -4.260 | -1.800 | -2.317 | H  |
| HETATM | 28       | C  | 0 | 3.092  | -1.412 | 2.532  | C  |
| HETATM | 29       | H  | 0 | 3.785  | -1.204 | 3.363  | H  |
| HETATM | 30       | H  | 0 | 2.167  | -0.829 | 2.708  | H  |
| HETATM | 31       | H  | 0 | 2.805  | -2.478 | 2.600  | H  |
| HETATM | 32       | C  | 0 | 2.691  | -1.068 | -2.480 | C  |
| HETATM | 33       | H  | 0 | 2.334  | -2.110 | -2.574 | H  |
| HETATM | 34       | H  | 0 | 1.786  | -0.430 | -2.519 | H  |
| HETATM | 35       | H  | 0 | 3.294  | -0.839 | -3.374 | H  |
| HETATM | 36       | C  | 0 | 6.794  | 0.699  | -0.152 | C  |

|        |    |    |   |        |        |        |    |
|--------|----|----|---|--------|--------|--------|----|
| HETATM | 37 | H  | 0 | 6.679  | 1.781  | 0.047  | H  |
| HETATM | 38 | H  | 0 | 7.501  | 0.313  | 0.602  | H  |
| HETATM | 39 | H  | 0 | 7.269  | 0.607  | -1.144 | H  |
| HETATM | 40 | C  | 0 | -2.033 | -2.250 | 2.572  | C  |
| HETATM | 41 | H  | 0 | -2.430 | -1.541 | 3.315  | H  |
| HETATM | 42 | H  | 0 | -2.316 | -3.269 | 2.905  | H  |
| HETATM | 43 | H  | 0 | -0.936 | -2.170 | 2.607  | H  |
| HETATM | 44 | C  | 0 | -1.689 | -2.590 | -2.466 | C  |
| HETATM | 45 | H  | 0 | -1.845 | -3.671 | -2.657 | H  |
| HETATM | 46 | H  | 0 | -2.043 | -2.045 | -3.355 | H  |
| HETATM | 47 | H  | 0 | -0.605 | -2.414 | -2.392 | H  |
| HETATM | 48 | C  | 0 | -5.976 | -1.104 | -0.315 | C  |
| HETATM | 49 | H  | 0 | -6.042 | -0.003 | -0.408 | H  |
| HETATM | 50 | H  | 0 | -6.462 | -1.526 | -1.211 | H  |
| HETATM | 51 | H  | 0 | -6.575 | -1.383 | 0.568  | H  |
| HETATM | 52 | H  | 0 | 2.307  | -3.832 | 0.860  | H  |
| HETATM | 53 | H  | 0 | -0.040 | -4.200 | 1.189  | H  |
| HETATM | 54 | C  | 0 | -1.757 | 3.064  | -0.088 | C  |
| HETATM | 55 | C  | 0 | 1.279  | 1.374  | 0.002  | C  |
| HETATM | 56 | F  | 0 | -3.200 | 1.841  | 1.302  | F  |
| HETATM | 57 | F  | 0 | -1.484 | 3.456  | -1.317 | F  |
| HETATM | 58 | F  | 0 | -3.429 | 1.637  | -0.855 | F  |
| HETATM | 59 | Cl | 0 | -0.969 | 3.916  | 1.160  | Cl |
| HETATM | 60 | F  | 0 | 2.239  | 1.369  | 0.902  | F  |
| HETATM | 61 | Cl | 0 | 1.631  | 2.666  | -1.130 | Cl |

END

### at5f.pdb

|        |          |    |   |        |        |        |    |
|--------|----------|----|---|--------|--------|--------|----|
| TITLE  | at5f.pdb |    |   |        |        |        |    |
| HETATM | 1        | Ru | 0 | 0.131  | 0.511  | -0.009 | Ru |
| HETATM | 2        | Cl | 0 | 0.955  | 0.365  | 2.265  | Cl |
| HETATM | 3        | Cl | 0 | -0.603 | 0.383  | -2.309 | Cl |
| HETATM | 4        | C  | 0 | -0.015 | -1.555 | -0.058 | C  |
| HETATM | 5        | N  | 0 | 1.061  | -2.346 | -0.149 | N  |
| HETATM | 6        | C  | 0 | 0.697  | -3.758 | -0.308 | C  |
| HETATM | 7        | C  | 0 | -0.828 | -3.731 | -0.162 | C  |
| HETATM | 8        | N  | 0 | -1.129 | -2.295 | -0.089 | N  |
| HETATM | 9        | C  | 0 | 2.392  | -1.823 | -0.116 | C  |
| HETATM | 10       | C  | 0 | 3.104  | -1.863 | 1.101  | C  |
| HETATM | 11       | C  | 0 | 4.343  | -1.228 | 1.165  | C  |
| HETATM | 12       | C  | 0 | 4.887  | -0.563 | 0.056  | C  |
| HETATM | 13       | C  | 0 | 4.192  | -0.598 | -1.153 | C  |
| HETATM | 14       | C  | 0 | 2.947  | -1.236 | -1.271 | C  |
| HETATM | 15       | C  | 0 | -2.450 | -1.754 | -0.023 | C  |
| HETATM | 16       | C  | 0 | -3.228 | -1.672 | -1.192 | C  |
| HETATM | 17       | C  | 0 | -4.488 | -1.069 | -1.106 | C  |
| HETATM | 18       | C  | 0 | -4.983 | -0.567 | 0.102  | C  |
| HETATM | 19       | C  | 0 | -4.206 | -0.711 | 1.258  | C  |
| HETATM | 20       | C  | 0 | -2.944 | -1.311 | 1.220  | C  |
| HETATM | 21       | C  | 0 | 2.552  | -2.575 | 2.297  | C  |
| HETATM | 22       | C  | 0 | 6.172  | 0.195  | 0.183  | C  |
| HETATM | 23       | C  | 0 | 2.297  | -1.319 | -2.619 | C  |
| HETATM | 24       | C  | 0 | -2.755 | -2.235 | -2.497 | C  |
| HETATM | 25       | C  | 0 | -6.308 | 0.130  | 0.158  | C  |
| HETATM | 26       | C  | 0 | -2.147 | -1.497 | 2.475  | C  |
| HETATM | 27       | H  | 0 | 1.197  | -4.373 | 0.462  | H  |
| HETATM | 28       | H  | 0 | 1.033  | -4.123 | -1.297 | H  |
| HETATM | 29       | H  | 0 | -1.184 | -4.237 | 0.754  | H  |
| HETATM | 30       | H  | 0 | -1.354 | -4.187 | -1.019 | H  |
| HETATM | 31       | H  | 0 | 4.887  | -1.224 | 2.118  | H  |
| HETATM | 32       | H  | 0 | 4.622  | -0.118 | -2.041 | H  |

|        |    |    |   |        |        |        |    |
|--------|----|----|---|--------|--------|--------|----|
| HETATM | 33 | H  | 0 | -5.094 | -0.980 | -2.017 | H  |
| HETATM | 34 | H  | 0 | -4.589 | -0.348 | 2.220  | H  |
| HETATM | 35 | H  | 0 | 2.999  | -2.190 | 3.228  | H  |
| HETATM | 36 | H  | 0 | 1.460  | -2.443 | 2.387  | H  |
| HETATM | 37 | H  | 0 | 2.765  | -3.662 | 2.258  | H  |
| HETATM | 38 | H  | 0 | 5.992  | 1.201  | 0.609  | H  |
| HETATM | 39 | H  | 0 | 6.665  | 0.343  | -0.793 | H  |
| HETATM | 40 | H  | 0 | 6.885  | -0.308 | 0.858  | H  |
| HETATM | 41 | H  | 0 | 2.031  | -0.322 | -3.009 | H  |
| HETATM | 42 | H  | 0 | 1.364  | -1.904 | -2.618 | H  |
| HETATM | 43 | H  | 0 | 2.992  | -1.778 | -3.346 | H  |
| HETATM | 44 | H  | 0 | -1.657 | -2.264 | -2.568 | H  |
| HETATM | 45 | H  | 0 | -3.114 | -1.627 | -3.344 | H  |
| HETATM | 46 | H  | 0 | -3.141 | -3.263 | -2.652 | H  |
| HETATM | 47 | H  | 0 | -6.182 | 1.229  | 0.124  | H  |
| HETATM | 48 | H  | 0 | -6.854 | -0.094 | 1.091  | H  |
| HETATM | 49 | H  | 0 | -6.956 | -0.143 | -0.692 | H  |
| HETATM | 50 | H  | 0 | -1.213 | -0.902 | 2.487  | H  |
| HETATM | 51 | H  | 0 | -2.733 | -1.203 | 3.362  | H  |
| HETATM | 52 | H  | 0 | -1.843 | -2.552 | 2.612  | H  |
| HETATM | 53 | C  | 0 | -1.330 | 1.620  | 0.428  | C  |
| HETATM | 54 | Cl | 0 | -1.855 | 2.092  | 2.013  | Cl |
| HETATM | 55 | F  | 0 | -2.247 | 1.989  | -0.429 | F  |
| HETATM | 56 | C  | 0 | 0.425  | 2.794  | -0.054 | C  |
| HETATM | 57 | C  | 0 | 1.553  | 1.947  | -0.422 | C  |
| HETATM | 58 | F  | 0 | 0.576  | 3.410  | 1.118  | F  |
| HETATM | 59 | Cl | 0 | -0.248 | 3.832  | -1.276 | Cl |
| HETATM | 60 | F  | 0 | 2.619  | 2.008  | 0.372  | F  |
| HETATM | 61 | F  | 0 | 1.969  | 1.963  | -1.689 | F  |

END

### at5PB.pdb

| TITLE  | at5PB.pdb |    |   |        |        |        |    |
|--------|-----------|----|---|--------|--------|--------|----|
| HETATM | 1         | Ru | 0 | 0.029  | 0.454  | -0.012 | Ru |
| HETATM | 2         | C  | 0 | 1.048  | -3.700 | -0.147 | C  |
| HETATM | 3         | C  | 0 | -0.475 | -3.801 | 0.007  | C  |
| HETATM | 4         | H  | 0 | 1.601  | -4.214 | 0.659  | H  |
| HETATM | 5         | H  | 0 | -0.784 | -4.292 | 0.949  | H  |
| HETATM | 6         | C  | 0 | 0.149  | -1.570 | -0.022 | C  |
| HETATM | 7         | N  | 0 | -0.901 | -2.394 | 0.013  | N  |
| HETATM | 8         | N  | 0 | 1.294  | -2.255 | -0.083 | N  |
| HETATM | 9         | Cl | 0 | 0.857  | 0.319  | 2.260  | Cl |
| HETATM | 10        | Cl | 0 | -0.707 | 0.337  | -2.301 | Cl |
| HETATM | 11        | C  | 0 | 1.246  | 1.930  | -0.384 | C  |
| HETATM | 12        | C  | 0 | -2.258 | -1.934 | 0.008  | C  |
| HETATM | 13        | C  | 0 | -2.976 | -1.912 | -1.203 | C  |
| HETATM | 14        | C  | 0 | -2.835 | -1.490 | 1.215  | C  |
| HETATM | 15        | C  | 0 | -4.251 | -1.341 | -1.202 | C  |
| HETATM | 16        | C  | 0 | -4.114 | -0.926 | 1.165  | C  |
| HETATM | 17        | C  | 0 | -4.822 | -0.817 | -0.037 | C  |
| HETATM | 18        | H  | 0 | -4.805 | -1.288 | -2.148 | H  |
| HETATM | 19        | H  | 0 | -4.562 | -0.554 | 2.095  | H  |
| HETATM | 20        | C  | 0 | 2.586  | -1.640 | -0.107 | C  |
| HETATM | 21        | C  | 0 | 3.064  | -1.068 | -1.302 | C  |
| HETATM | 22        | C  | 0 | 3.349  | -1.605 | 1.079  | C  |
| HETATM | 23        | C  | 0 | 4.282  | -0.376 | -1.263 | C  |
| HETATM | 24        | C  | 0 | 4.558  | -0.911 | 1.067  | C  |
| HETATM | 25        | C  | 0 | 5.028  | -0.269 | -0.088 | C  |
| HETATM | 26        | H  | 0 | 4.657  | 0.082  | -2.187 | H  |
| HETATM | 27        | H  | 0 | 5.145  | -0.856 | 1.992  | H  |
| HETATM | 28        | C  | 0 | -2.417 | -2.509 | -2.458 | C  |



|        |    |    |   |        |        |        |    |
|--------|----|----|---|--------|--------|--------|----|
| HETATM | 29 | H  | 0 | -2.834 | -2.016 | -3.351 | H  |
| HETATM | 30 | H  | 0 | -1.321 | -2.405 | -2.520 | H  |
| HETATM | 31 | H  | 0 | -2.668 | -3.586 | -2.535 | H  |
| HETATM | 32 | C  | 0 | -2.119 | -1.633 | 2.522  | C  |
| HETATM | 33 | H  | 0 | -1.741 | -2.661 | 2.673  | H  |
| HETATM | 34 | H  | 0 | -1.242 | -0.963 | 2.608  | H  |
| HETATM | 35 | H  | 0 | -2.791 | -1.398 | 3.364  | H  |
| HETATM | 36 | C  | 0 | -6.151 | -0.129 | -0.080 | C  |
| HETATM | 37 | H  | 0 | -6.025 | 0.953  | -0.279 | H  |
| HETATM | 38 | H  | 0 | -6.798 | -0.525 | -0.881 | H  |
| HETATM | 39 | H  | 0 | -6.693 | -0.213 | 0.877  | H  |
| HETATM | 40 | C  | 0 | 2.338  | -1.197 | -2.606 | C  |
| HETATM | 41 | H  | 0 | 3.049  | -1.424 | -3.419 | H  |
| HETATM | 42 | H  | 0 | 1.566  | -1.984 | -2.595 | H  |
| HETATM | 43 | H  | 0 | 1.811  | -0.267 | -2.884 | H  |
| HETATM | 44 | C  | 0 | 2.902  | -2.316 | 2.320  | C  |
| HETATM | 45 | H  | 0 | 3.281  | -3.357 | 2.345  | H  |
| HETATM | 46 | H  | 0 | 3.284  | -1.812 | 3.223  | H  |
| HETATM | 47 | H  | 0 | 1.805  | -2.347 | 2.412  | H  |
| HETATM | 48 | C  | 0 | 6.297  | 0.526  | -0.051 | C  |
| HETATM | 49 | H  | 0 | 6.115  | 1.542  | 0.346  | H  |
| HETATM | 50 | H  | 0 | 7.056  | 0.065  | 0.605  | H  |
| HETATM | 51 | H  | 0 | 6.738  | 0.648  | -1.055 | H  |
| HETATM | 52 | H  | 0 | -0.962 | -4.337 | -0.826 | H  |
| HETATM | 53 | H  | 0 | 1.414  | -4.100 | -1.112 | H  |
| HETATM | 54 | C  | 0 | -0.127 | 2.732  | 0.070  | C  |
| HETATM | 55 | C  | 0 | -1.367 | 1.783  | 0.417  | C  |
| HETATM | 56 | F  | 0 | 2.251  | 2.262  | 0.414  | F  |
| HETATM | 57 | F  | 0 | 1.642  | 2.190  | -1.626 | F  |
| HETATM | 58 | F  | 0 | 0.226  | 3.427  | 1.167  | F  |
| HETATM | 59 | F  | 0 | -2.394 | 1.917  | -0.421 | F  |
| HETATM | 60 | Cl | 0 | -1.998 | 2.002  | 2.048  | Cl |
| HETATM | 61 | Cl | 0 | -0.592 | 3.857  | -1.223 | Cl |

END

### at5g.pdb

| TITLE  | at5g.pdb |    |   |        |        |        |    |
|--------|----------|----|---|--------|--------|--------|----|
| HETATM | 1        | Ru | 0 | 0.017  | 0.510  | -0.021 | Ru |
| HETATM | 2        | Cl | 0 | -0.733 | 0.381  | -2.308 | Cl |
| HETATM | 3        | Cl | 0 | 0.837  | 0.370  | 2.258  | Cl |
| HETATM | 4        | C  | 0 | 0.159  | -1.548 | -0.013 | C  |
| HETATM | 5        | N  | 0 | -0.882 | -2.386 | 0.032  | N  |
| HETATM | 6        | C  | 0 | -0.454 | -3.790 | 0.040  | C  |
| HETATM | 7        | C  | 0 | 1.072  | -3.684 | -0.063 | C  |
| HETATM | 8        | N  | 0 | 1.306  | -2.235 | -0.056 | N  |
| HETATM | 9        | C  | 0 | -2.243 | -1.940 | 0.006  | C  |
| HETATM | 10       | C  | 0 | -2.947 | -1.938 | -1.214 | C  |
| HETATM | 11       | C  | 0 | -4.235 | -1.398 | -1.231 | C  |
| HETATM | 12       | C  | 0 | -4.833 | -0.885 | -0.074 | C  |
| HETATM | 13       | C  | 0 | -4.135 | -0.966 | 1.135  | C  |
| HETATM | 14       | C  | 0 | -2.843 | -1.499 | 1.202  | C  |
| HETATM | 15       | C  | 0 | 2.602  | -1.629 | -0.078 | C  |
| HETATM | 16       | C  | 0 | 3.357  | -1.564 | 1.109  | C  |
| HETATM | 17       | C  | 0 | 4.578  | -0.886 | 1.080  | C  |
| HETATM | 18       | C  | 0 | 5.065  | -0.295 | -0.092 | C  |
| HETATM | 19       | C  | 0 | 4.325  | -0.435 | -1.270 | C  |
| HETATM | 20       | C  | 0 | 3.098  | -1.108 | -1.290 | C  |
| HETATM | 21       | C  | 0 | -2.356 | -2.521 | -2.461 | C  |
| HETATM | 22       | C  | 0 | -6.183 | -0.240 | -0.135 | C  |
| HETATM | 23       | C  | 0 | -2.136 | -1.621 | 2.518  | C  |
| HETATM | 24       | C  | 0 | 2.901  | -2.231 | 2.371  | C  |

|        |    |    |   |        |        |        |    |
|--------|----|----|---|--------|--------|--------|----|
| HETATM | 25 | C  | 0 | 6.347  | 0.480  | -0.080 | C  |
| HETATM | 26 | C  | 0 | 2.359  | -1.278 | -2.582 | C  |
| HETATM | 27 | H  | 0 | -0.910 | -4.329 | -0.809 | H  |
| HETATM | 28 | H  | 0 | -0.794 | -4.284 | 0.969  | H  |
| HETATM | 29 | H  | 0 | 1.477  | -4.127 | -0.992 | H  |
| HETATM | 30 | H  | 0 | 1.598  | -4.156 | 0.787  | H  |
| HETATM | 31 | H  | 0 | -4.780 | -1.363 | -2.183 | H  |
| HETATM | 32 | H  | 0 | -4.602 | -0.599 | 2.058  | H  |
| HETATM | 33 | H  | 0 | 5.160  | -0.808 | 2.007  | H  |
| HETATM | 34 | H  | 0 | 4.715  | -0.021 | -2.208 | H  |
| HETATM | 35 | H  | 0 | -2.774 | -2.040 | -3.360 | H  |
| HETATM | 36 | H  | 0 | -1.263 | -2.388 | -2.509 | H  |
| HETATM | 37 | H  | 0 | -2.577 | -3.605 | -2.541 | H  |
| HETATM | 38 | H  | 0 | -6.093 | 0.840  | -0.360 | H  |
| HETATM | 39 | H  | 0 | -6.816 | -0.677 | -0.926 | H  |
| HETATM | 40 | H  | 0 | -6.724 | -0.320 | 0.823  | H  |
| HETATM | 41 | H  | 0 | -2.812 | -1.367 | 3.350  | H  |
| HETATM | 42 | H  | 0 | -1.255 | -0.957 | 2.596  | H  |
| HETATM | 43 | H  | 0 | -1.768 | -2.650 | 2.690  | H  |
| HETATM | 44 | H  | 0 | 1.803  | -2.290 | 2.442  | H  |
| HETATM | 45 | H  | 0 | 3.247  | -1.677 | 3.259  | H  |
| HETATM | 46 | H  | 0 | 3.310  | -3.258 | 2.449  | H  |
| HETATM | 47 | H  | 0 | 6.166  | 1.541  | 0.176  | H  |
| HETATM | 48 | H  | 0 | 6.844  | 0.471  | -1.065 | H  |
| HETATM | 49 | H  | 0 | 7.059  | 0.092  | 0.668  | H  |
| HETATM | 50 | H  | 0 | 1.573  | -0.512 | -2.727 | H  |
| HETATM | 51 | H  | 0 | 3.049  | -1.207 | -3.438 | H  |
| HETATM | 52 | H  | 0 | 1.840  | -2.251 | -2.645 | H  |
| HETATM | 53 | C  | 0 | 1.342  | 1.809  | -0.419 | C  |
| HETATM | 54 | F  | 0 | 1.701  | 2.126  | -1.642 | F  |
| HETATM | 55 | F  | 0 | 2.278  | 2.246  | 0.386  | F  |
| HETATM | 56 | C  | 0 | -0.270 | 2.763  | 0.099  | C  |
| HETATM | 57 | C  | 0 | -1.419 | 1.864  | 0.440  | C  |
| HETATM | 58 | Cl | 0 | -0.583 | 3.846  | -1.249 | Cl |
| HETATM | 59 | F  | 0 | 0.219  | 3.432  | 1.150  | F  |
| HETATM | 60 | F  | 0 | -2.449 | 1.902  | -0.411 | F  |
| HETATM | 61 | Cl | 0 | -2.052 | 1.975  | 2.076  | Cl |

END

## at5h.pdb

| TITLE  | at5h.pdb |    |   |        |        |        |    |
|--------|----------|----|---|--------|--------|--------|----|
| HETATM | 1        | Ru | 0 | -0.173 | 0.349  | 0.033  | Ru |
| HETATM | 2        | C  | 0 | 0.681  | -3.713 | 0.118  | C  |
| HETATM | 3        | C  | 0 | 2.137  | -3.242 | 0.072  | C  |
| HETATM | 4        | H  | 0 | 0.416  | -4.376 | -0.726 | H  |
| HETATM | 5        | H  | 0 | 2.661  | -3.550 | -0.853 | H  |
| HETATM | 6        | C  | 0 | 0.745  | -1.364 | 0.054  | C  |
| HETATM | 7        | N  | 0 | 2.028  | -1.779 | 0.115  | N  |
| HETATM | 8        | N  | 0 | -0.059 | -2.460 | 0.041  | N  |
| HETATM | 9        | Cl | 0 | -0.688 | 0.595  | -2.285 | Cl |
| HETATM | 10       | Cl | 0 | -0.222 | 0.398  | 2.430  | Cl |
| HETATM | 11       | C  | 0 | -2.867 | 2.097  | 0.210  | C  |
| HETATM | 12       | C  | 0 | 3.194  | -0.964 | 0.026  | C  |
| HETATM | 13       | C  | 0 | 3.916  | -0.672 | 1.196  | C  |
| HETATM | 14       | C  | 0 | 3.616  | -0.498 | -1.233 | C  |
| HETATM | 15       | C  | 0 | 5.083  | 0.088  | 1.085  | C  |
| HETATM | 16       | C  | 0 | 4.782  | 0.273  | -1.298 | C  |
| HETATM | 17       | C  | 0 | 5.527  | 0.572  | -0.152 | C  |
| HETATM | 18       | H  | 0 | 5.651  | 0.326  | 1.995  | H  |
| HETATM | 19       | H  | 0 | 5.119  | 0.643  | -2.275 | H  |
| HETATM | 20       | C  | 0 | -1.474 | -2.331 | -0.103 | C  |

|        |    |    |   |        |        |        |    |
|--------|----|----|---|--------|--------|--------|----|
| HETATM | 21 | C  | 0 | -2.297 | -2.233 | 1.039  | C  |
| HETATM | 22 | C  | 0 | -2.027 | -2.296 | -1.404 | C  |
| HETATM | 23 | C  | 0 | -3.659 | -1.975 | 0.850  | C  |
| HETATM | 24 | C  | 0 | -3.390 | -2.027 | -1.541 | C  |
| HETATM | 25 | C  | 0 | -4.212 | -1.828 | -0.425 | C  |
| HETATM | 26 | H  | 0 | -4.302 | -1.866 | 1.734  | H  |
| HETATM | 27 | H  | 0 | -3.816 | -1.952 | -2.549 | H  |
| HETATM | 28 | C  | 0 | 3.388  | -1.091 | 2.532  | C  |
| HETATM | 29 | H  | 0 | 4.069  | -0.794 | 3.346  | H  |
| HETATM | 30 | H  | 0 | 2.402  | -0.624 | 2.725  | H  |
| HETATM | 31 | H  | 0 | 3.235  | -2.184 | 2.610  | H  |
| HETATM | 32 | C  | 0 | 2.822  | -0.798 | -2.468 | C  |
| HETATM | 33 | H  | 0 | 2.543  | -1.866 | -2.537 | H  |
| HETATM | 34 | H  | 0 | 1.870  | -0.230 | -2.497 | H  |
| HETATM | 35 | H  | 0 | 3.387  | -0.539 | -3.378 | H  |
| HETATM | 36 | C  | 0 | 6.759  | 1.422  | -0.240 | C  |
| HETATM | 37 | H  | 0 | 6.523  | 2.490  | -0.071 | H  |
| HETATM | 38 | H  | 0 | 7.509  | 1.142  | 0.519  | H  |
| HETATM | 39 | H  | 0 | 7.235  | 1.356  | -1.233 | H  |
| HETATM | 40 | C  | 0 | -1.776 | -2.475 | 2.422  | C  |
| HETATM | 41 | H  | 0 | -2.212 | -1.765 | 3.143  | H  |
| HETATM | 42 | H  | 0 | -2.049 | -3.496 | 2.758  | H  |
| HETATM | 43 | H  | 0 | -0.684 | -2.368 | 2.495  | H  |
| HETATM | 44 | C  | 0 | -1.190 | -2.590 | -2.610 | C  |
| HETATM | 45 | H  | 0 | -1.147 | -3.682 | -2.799 | H  |
| HETATM | 46 | H  | 0 | -1.609 | -2.116 | -3.511 | H  |
| HETATM | 47 | H  | 0 | -0.155 | -2.227 | -2.507 | H  |
| HETATM | 48 | C  | 0 | -5.645 | -1.427 | -0.593 | C  |
| HETATM | 49 | H  | 0 | -5.732 | -0.325 | -0.652 | H  |
| HETATM | 50 | H  | 0 | -6.084 | -1.829 | -1.522 | H  |
| HETATM | 51 | H  | 0 | -6.271 | -1.751 | 0.256  | H  |
| HETATM | 52 | H  | 0 | 2.737  | -3.607 | 0.924  | H  |
| HETATM | 53 | H  | 0 | 0.432  | -4.251 | 1.053  | H  |
| HETATM | 54 | C  | 0 | -1.906 | 3.049  | 0.251  | C  |
| HETATM | 55 | C  | 0 | 1.294  | 1.435  | -0.022 | C  |
| HETATM | 56 | F  | 0 | -3.435 | 1.745  | -0.925 | F  |
| HETATM | 57 | F  | 0 | -1.394 | 3.451  | 1.396  | F  |
| HETATM | 58 | F  | 0 | 2.181  | 1.638  | 0.926  | F  |
| HETATM | 59 | F  | 0 | 1.610  | 2.270  | -0.992 | F  |
| HETATM | 60 | Cl | 0 | -1.392 | 3.917  | -1.120 | Cl |
| HETATM | 61 | Cl | 0 | -3.553 | 1.406  | 1.609  | Cl |

END
